# Supplementary material for: Metabolite Biomarkers for Early Ischemic Hypoxic Encephalopathy: An Experimental Study Using the NeoBase 2 MSMS Kit in a Rat Model
Source: Preprints.org preprint supplement (doi:10.20944/preprints202312.0281.v1), 2023-12-05
Supplement: Supplementary file 1 [file supplementary]

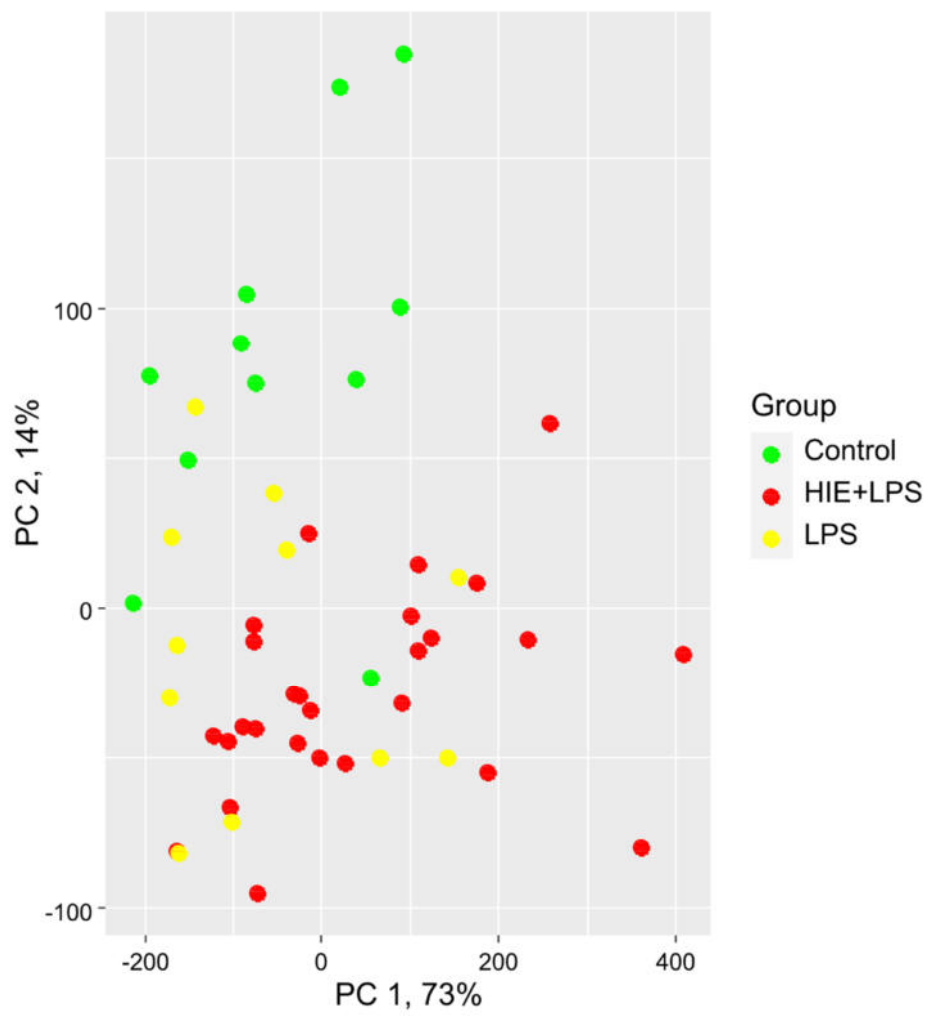

Figure S1. Principal component analysis (PCA) for the study of the effect inflammation influence on ischemia/hypoxia DBS metabolites, whose levels are statistically significantly different when comparing pairwise groups.

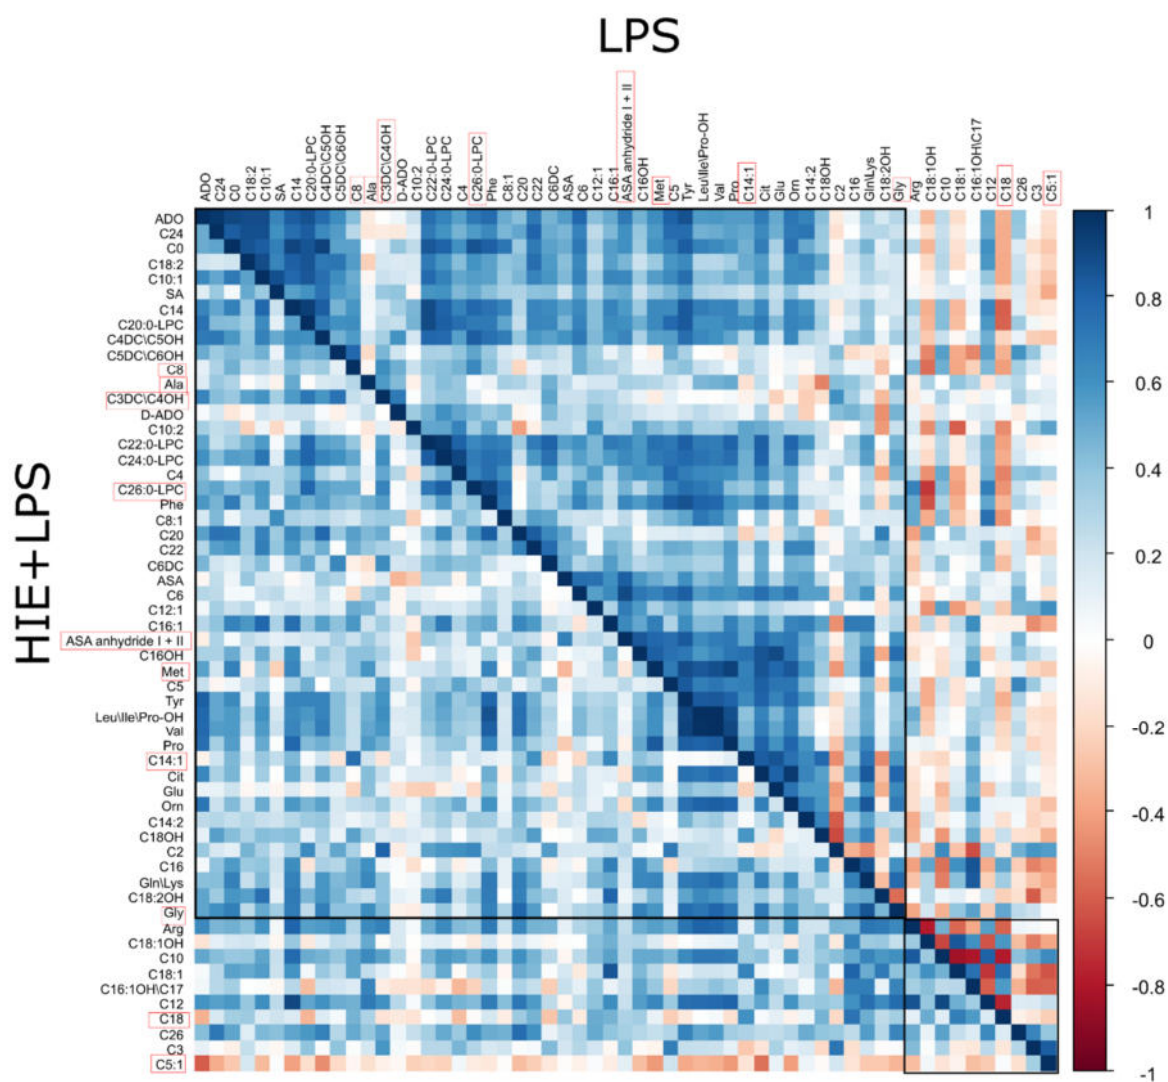

Figure S2. Comparison of correlations for the group with inflammation and the group with inflammation and hypoxia/ischemia. Compounds with a statistically significant difference in levels are highlighted in red, clusters of compounds are highlighted in black squares.

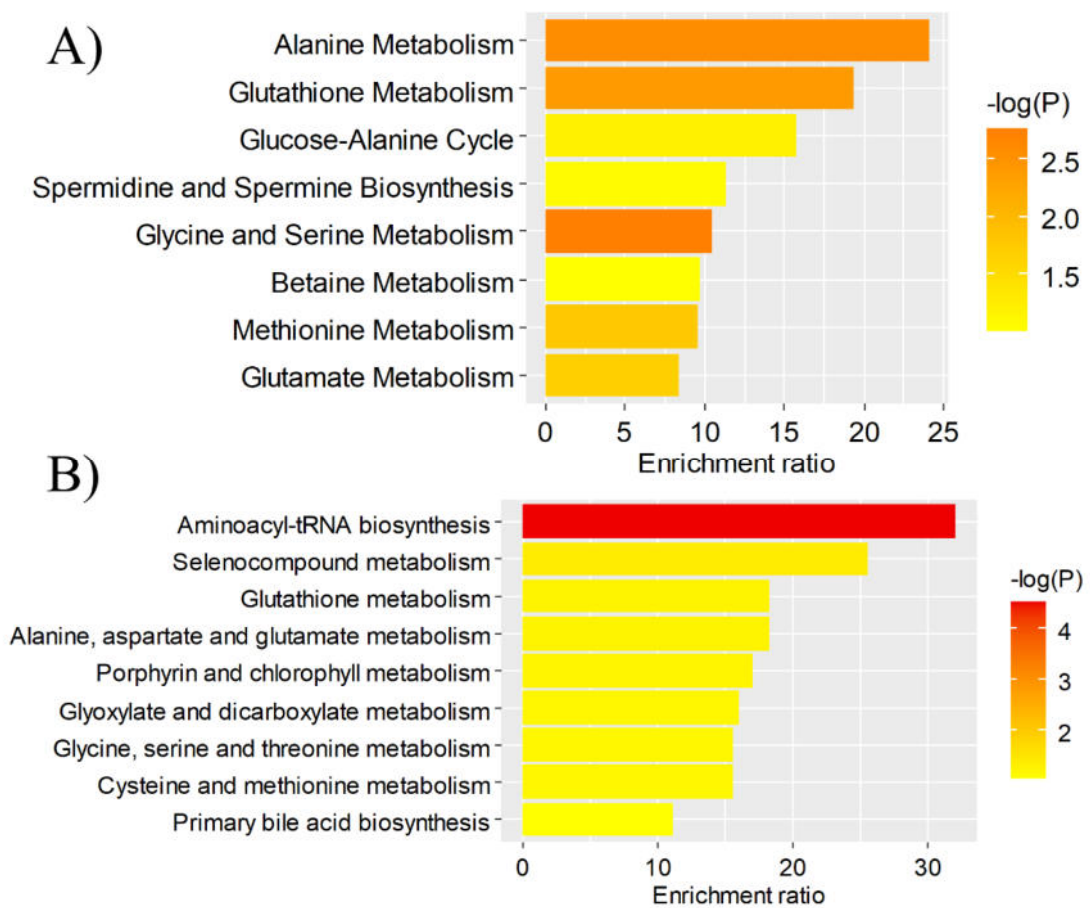

Figure S3. Enrichment levels of statistically significantly enriched pathways during ischemia/hypoxia against the inflammation according to a) the SMPDB library, b) the KEGG library.

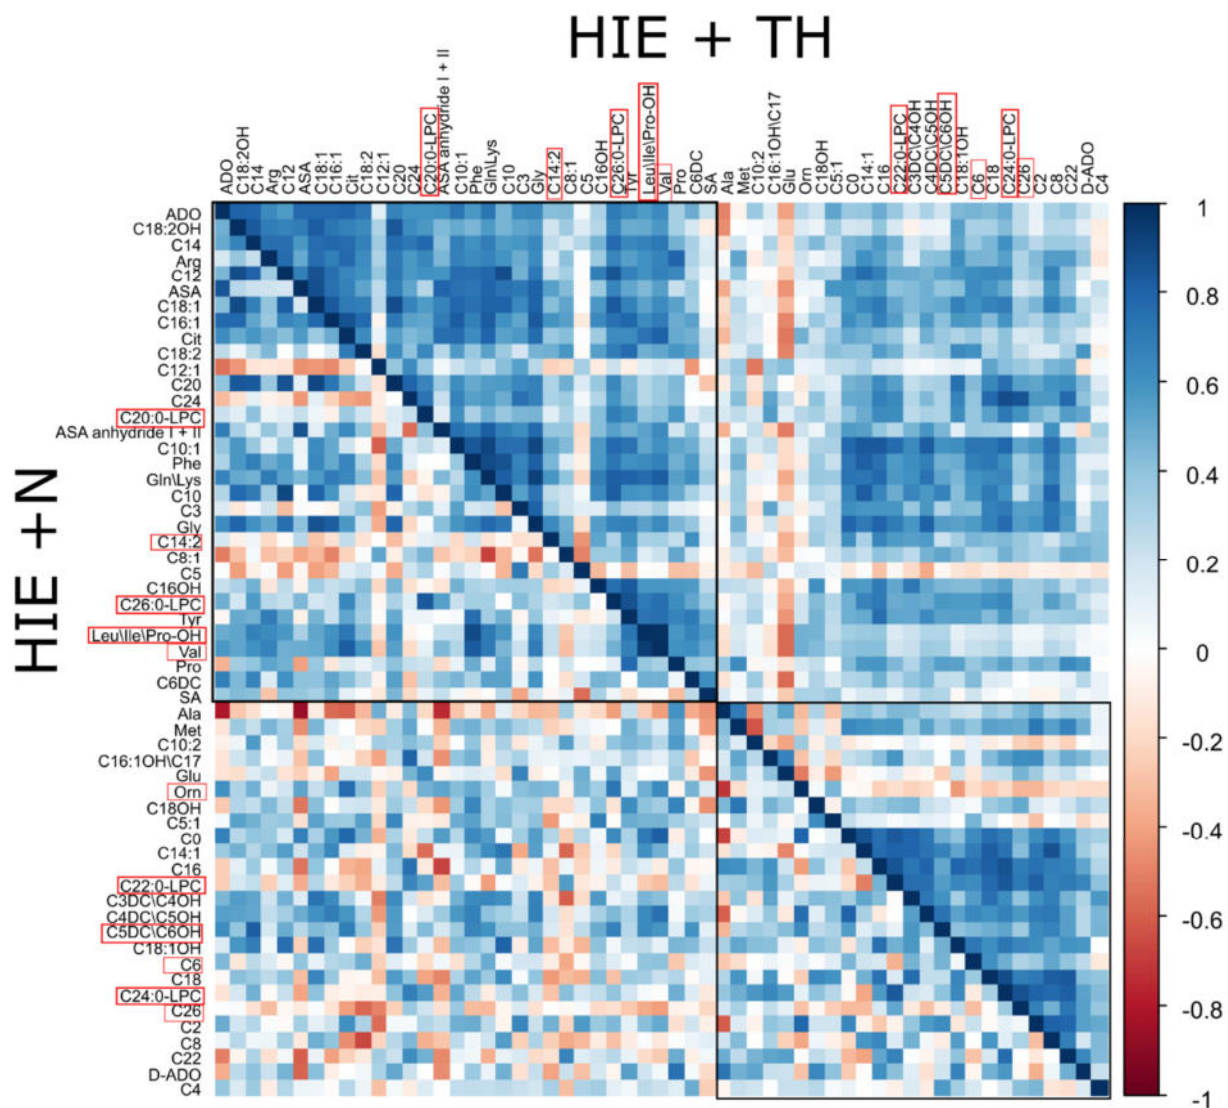

Figure S4. Comparison of correlations for the group with normothermia and the group with hypothermia after hypoxia/ischemia. Compounds with a statistically significant difference in levels are highlighted in red, clusters of compounds are highlighted in black squares.

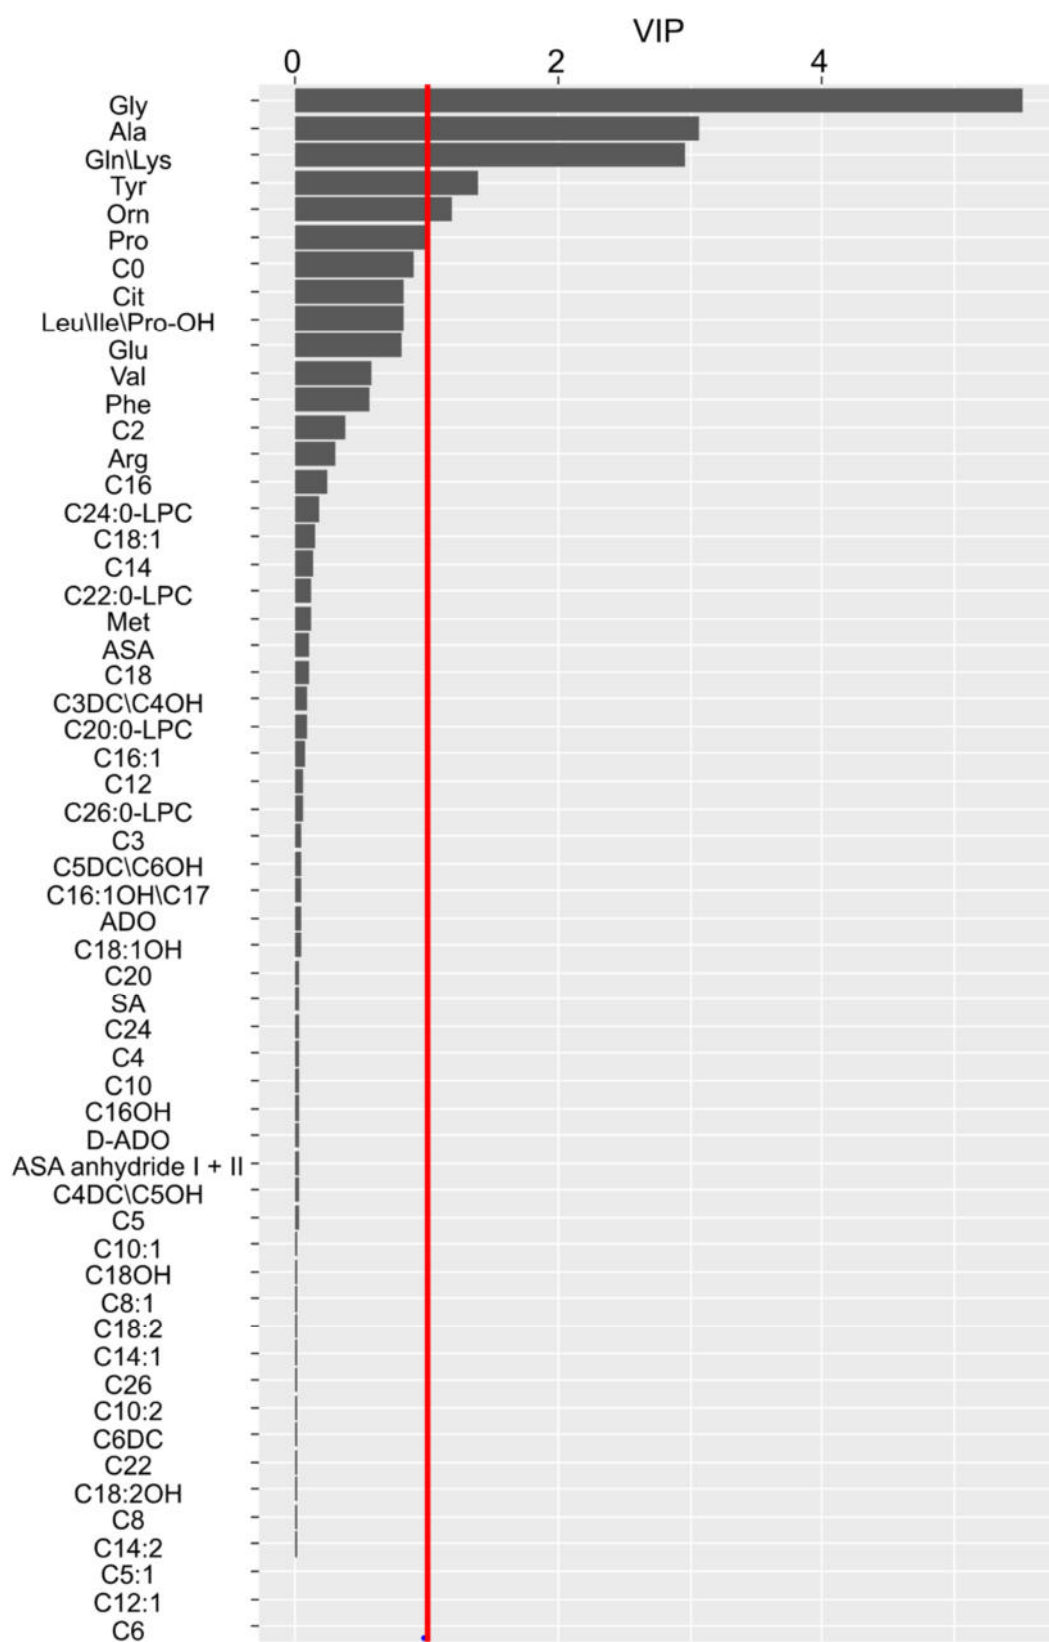

Figure S5. Distribution of variable projection values (VIP) in the OPLS-DA model for diagnosing hypoxia using a blood profile three hours after injury.

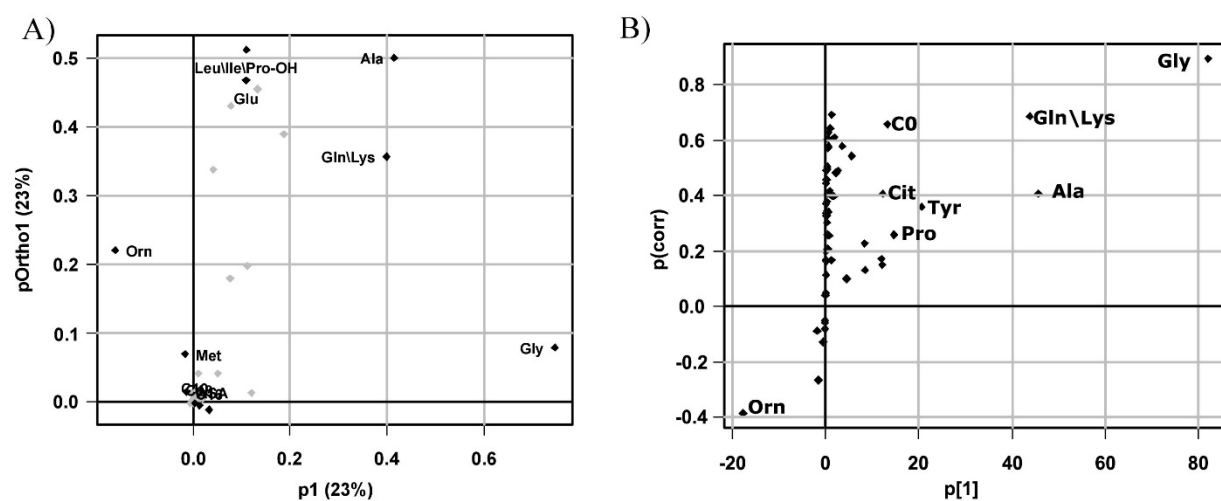

Figure S6. Loading plot a) and S-plot (b) of compounds, which are included in the OPLS model for hypoxia detection 3 hours after damage.

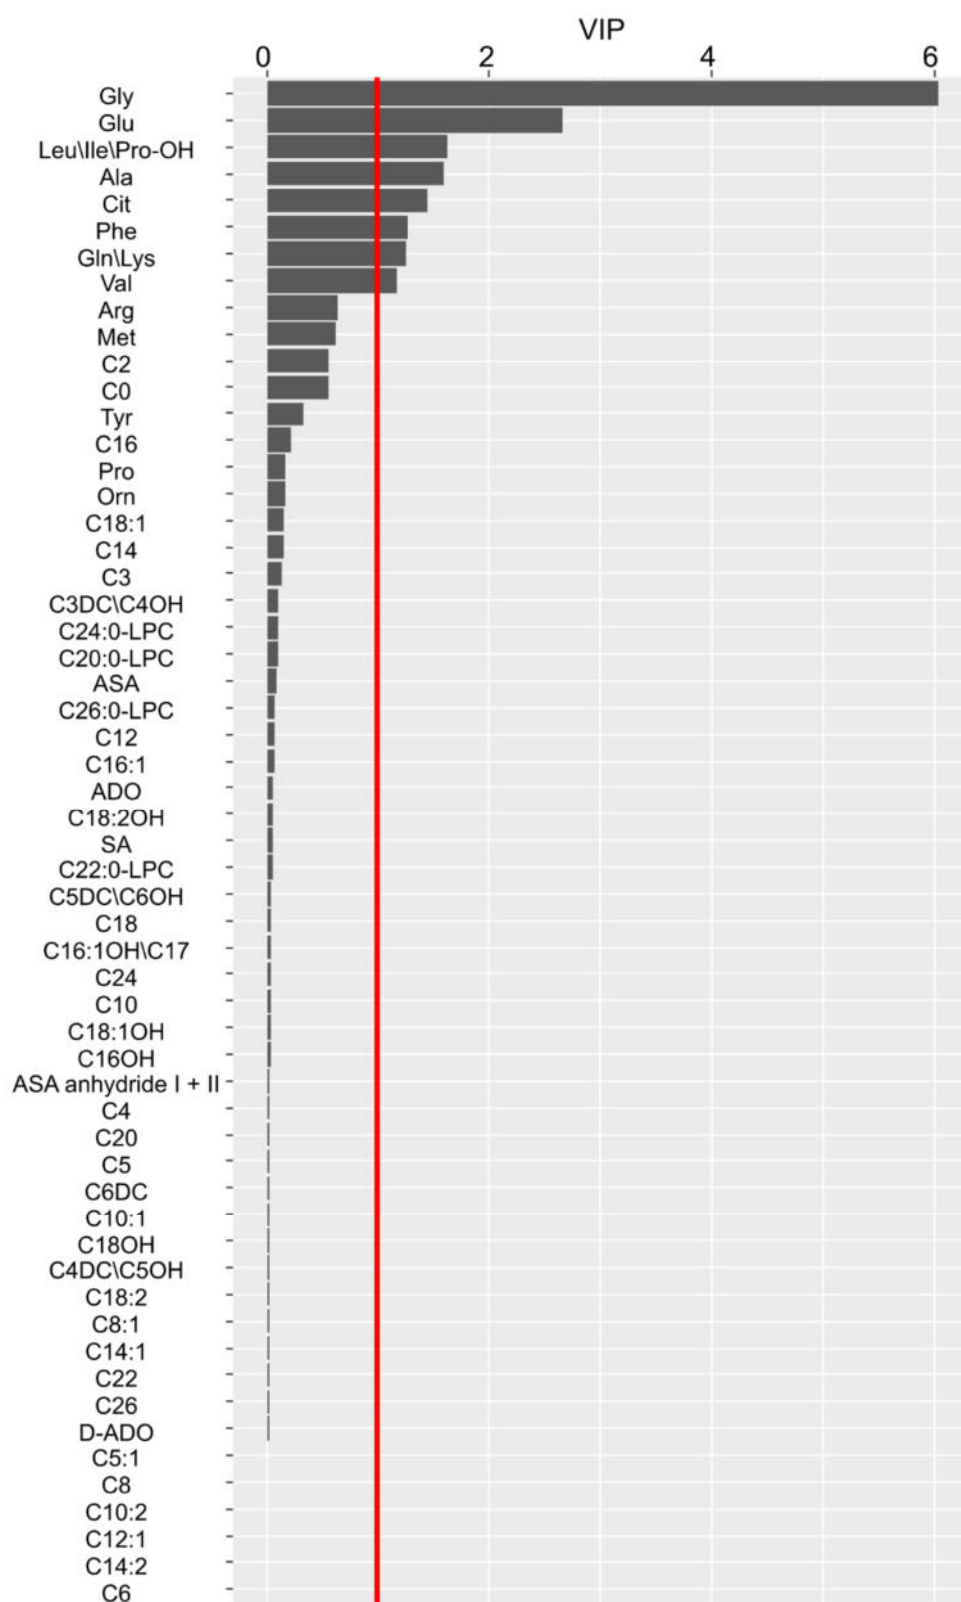

Рисунок S7. Distribution of variable projection values (VIP) in the OPLS-DA model for diagnosing hypoxia using a blood profile six hours after injury.

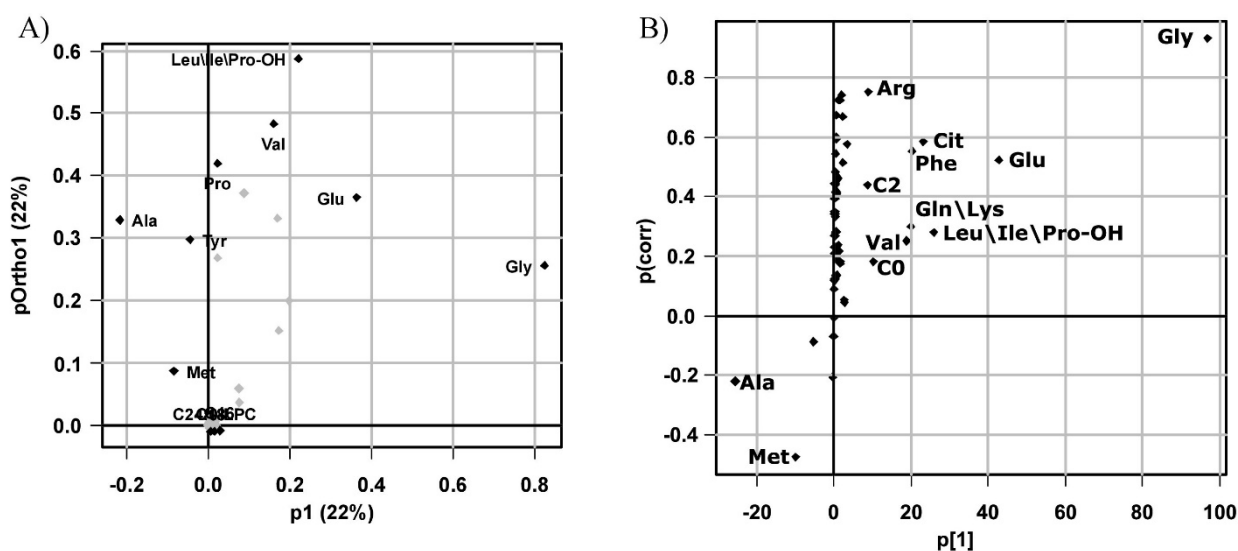

Figure S8. Loading plot (a) and S-plot (b) of compounds, which are included in the OPLS model for hypoxia detection 6 hours after damage.

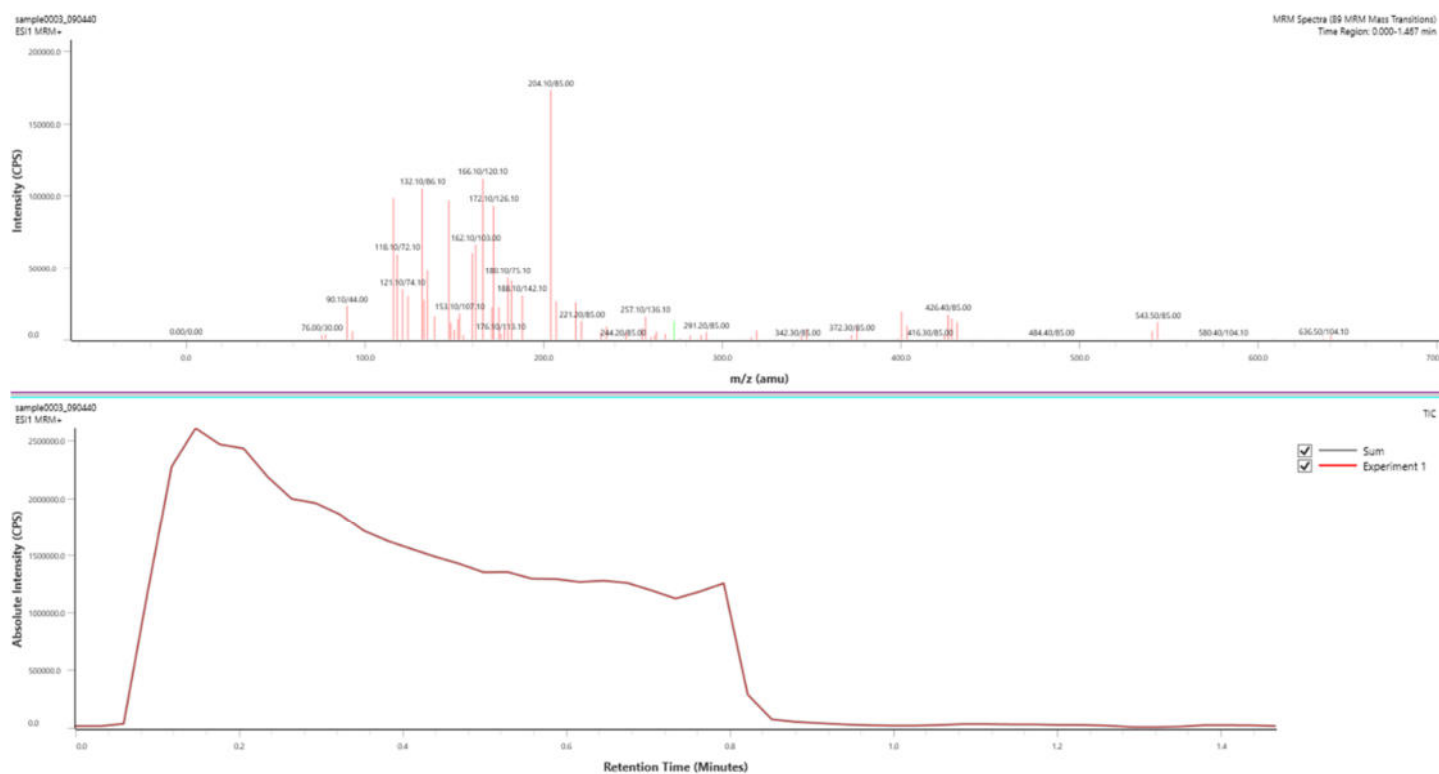

Figure S9. Example of a typical flow injection chromatogram obtained for a low quality control (LC) provided by NeoBase™ 2 Non-derivatized MSMS kit on the QSight 225MD tandem mass spectrometer.

Table S1. Differences in the molecular profile of blood 3 hours after hypoxia compared to control. Changes with FDR < 0.05 are marked bold.

| Species | control             | 3h                  | P                | FDR          | FC          |
|---------|---------------------|---------------------|------------------|--------------|-------------|
| Gly     | <b>237(217;279)</b> | <b>359(322;384)</b> | <b>&lt;0.001</b> | <b>0.004</b> | <b>1.51</b> |



|           |                      |                    |       |      |      |
|-----------|----------------------|--------------------|-------|------|------|
| C3DC\C4OH | 0.093(0.082;0.12)    | 0.15(0.12;0.16)    | 0.003 | 0.08 | 1.61 |
| C5DC\C6OH | 0.022(0.019;0.028)   | 0.034(0.026;0.042) | 0.02  | 0.21 | 1.55 |
| C10:2     | 0.002(0.002;0.0028)  | 0.004(0.003;0.004) | 0.02  | 0.21 | 2.00 |
| Gln\Lys   | 149(126;188)         | 202(187;211)       | 0.02  | 0.21 | 1.36 |
| C26       | 0.004(0.004;0.005)   | 0.005(0.005;0.006) | 0.02  | 0.21 | 1.25 |
| C2        | 3.9(3.2;4.5)         | 4.3(4.1;5.6)       | 0.03  | 0.21 | 1.10 |
| C18:2     | 0.005(0.0042;0.0068) | 0.009(0.006;0.01)  | 0.03  | 0.21 | 1.80 |
| C14       | 0.32(0.28;0.36)      | 0.42(0.35;0.44)    | 0.04  | 0.27 | 1.31 |
| C24       | 0.034(0.03;0.035)    | 0.039(0.035;0.045) | 0.05  | 0.27 | 1.15 |

Table S2. Differences in the molecular profile of blood 6 hours after hypoxia compared to control. Changes with FDR < 0.05 are marked bold.

| Species          | control                     | 6h                          | P                | FDR          | FC          |
|------------------|-----------------------------|-----------------------------|------------------|--------------|-------------|
| <b>Gly</b>       | <b>237(217;279)</b>         | <b>376(327;448)</b>         | <b>&lt;0.001</b> | <b>0.002</b> | <b>1.59</b> |
| <b>C26</b>       | <b>0.004(0.004;0.005)</b>   | <b>0.0075(0.0058;0.009)</b> | <b>&lt;0.001</b> | <b>0.009</b> | <b>1.88</b> |
| <b>Met</b>       | <b>20(18;22)</b>            | <b>15(13;17)</b>            | <b>0.002</b>     | <b>0.03</b>  | <b>0.75</b> |
| <b>C3DC\C4OH</b> | <b>0.093(0.082;0.12)</b>    | <b>0.16(0.12;0.18)</b>      | <b>0.002</b>     | <b>0.03</b>  | <b>1.72</b> |
| <b>C3</b>        | <b>0.15(0.13;0.16)</b>      | <b>0.22(0.18;0.28)</b>      | <b>0.002</b>     | <b>0.03</b>  | <b>1.47</b> |
| <b>C4</b>        | <b>0.042(0.04;0.048)</b>    | <b>0.053(0.05;0.061)</b>    | <b>0.004</b>     | <b>0.04</b>  | <b>1.26</b> |
| <b>C18:2</b>     | <b>0.005(0.0042;0.0068)</b> | <b>0.008(0.007;0.009)</b>   | <b>0.006</b>     | <b>0.05</b>  | <b>1.60</b> |
| C2               | 3.9(3.2;4.5)                | 5(4.6;5.8)                  | 0.009            | 0.06         | 1.28        |
| C5DC\C6OH        | 0.022(0.019;0.028)          | 0.031(0.029;0.038)          | 0.01             | 0.07         | 1.41        |
| C24              | 0.034(0.03;0.035)           | 0.040(0.037;0.046)          | 0.01             | 0.07         | 1.18        |
| C8:1             | 0.0075(0.0055;0.008)        | 0.012(0.0097;0.015)         | 0.01             | 0.07         | 1.60        |
| C20              | 0.024(0.022;0.03)           | 0.032(0.029;0.039)          | 0.02             | 0.08         | 1.33        |
| C5               | 0.03(0.025;0.037)           | 0.039(0.036;0.045)          | 0.02             | 0.11         | 1.30        |
| SA               | 0.33(0.32;0.36)             | 0.37(0.35;0.38)             | 0.03             | 0.11         | 1.12        |
| C10:2            | 0.002(0.002;0.0028)         | 0.0035(0.0028;0.0052)       | 0.03             | 0.13         | 1.75        |

Table S3. Pathways enriched with markers for a three-hour time period after ischemia/hypoxia relative to the control using the SMPDB and KEGG libraries, the number of compounds in them, the degree of enrichment, the number of markers in them, the probability of a random hit.

| Library | Pathway                                       | Total | Enrichment, mean | Hits, median | P, mean |
|---------|-----------------------------------------------|-------|------------------|--------------|---------|
| SMPDB   | Ammonia Recycling                             | 32    | 15.99            | 2            | 0.03    |
| SMPDB   | Beta Oxidation of Very Long Chain Fatty Acids | 17    | 18.41            | 1            | 0.05    |
| SMPDB   | Alanine Metabolism                            | 17    | 18.41            | 1            | 0.05    |
| SMPDB   | Carnitine Synthesis                           | 22    | 23.26            | 2            | 0.02    |
| KEGG    | Glyoxylate and dicarboxylate metabolism       | 32    | 34.65            | 2            | 0.01    |
| KEGG    | Aminoacyl-tRNA biosynthesis                   | 48    | 31.99            | 2            | 0.001   |
| KEGG    | Glutathione metabolism                        | 28    | 24.36            | 1            | 0.04    |

|      |                                          |    |       |   |       |
|------|------------------------------------------|----|-------|---|-------|
| KEGG | Porphyrin and chlorophyll metabolism     | 30 | 22.74 | 1 | 0.04  |
| KEGG | Glycine, serine and threonine metabolism | 33 | 20.67 | 1 | 0.049 |

Table S4. Pathways enriched with markers for a six-hour time period after ischemia/hypoxia relative to the control using the SMPDB and KEGG libraries, the number of compounds in them, the degree of enrichment, the number of markers in them, the probability of a random hit.

| Library | Pathway                                  | Total | Enrichment, mean | Hits, median | P, mean |
|---------|------------------------------------------|-------|------------------|--------------|---------|
| SMPDB   | Oxidation of Branched Chain Fatty Acids  | 26    | 19.61            | 2            | 0.004   |
| SMPDB   | Methionine Metabolism                    | 43    | 11.90            | 2            | 0.01    |
| SMPDB   | Glycine and Serine Metabolism            | 59    | 8.70             | 2            | 0.02    |
| KEGG    | Aminoacyl-tRNA biosynthesis              | 48    | 32.00            | 2            | <0.001  |
| KEGG    | Glutathione metabolism                   | 28    | 27.40            | 1            | 0.04    |
| KEGG    | Porphyrin and chlorophyll metabolism     | 30    | 25.58            | 1            | 0.04    |
| KEGG    | Glyoxylate and dicarboxylate metabolism  | 32    | 23.98            | 1            | 0.04    |
| KEGG    | Glycine, serine and threonine metabolism | 33    | 23.26            | 1            | 0.04    |
| KEGG    | Cysteine and methionine metabolism       | 33    | 23.26            | 1            | 0.04    |

Table S6. Differences in the molecular profile of blood after hypothermic regimen compared to normothermic regimen in a rat model of hypoxic-ischemic injury.

| Compounds      | Normotermia          | Hypotermia          | P     | FDR  | FC   |
|----------------|----------------------|---------------------|-------|------|------|
| C22:0-LPC      | 1.5(1.3;1.7)         | 1.2(1.1;1.4)        | 0.006 | 0.20 | 0.80 |
| C24:0-LPC      | 2.3(2.1;2.7)         | 1.9(1.8;2.2)        | 0.007 | 0.20 | 0.83 |
| Orn            | 17(13;21)            | 25(20;41)           | 0.01  | 0.23 | 1.47 |
| C26            | 0.007(0.0062;0.008)  | 0.006(0.005;0.007)  | 0.02  | 0.25 | 0.86 |
| Val            | 110(104;124)         | 146(120;171)        | 0.02  | 0.25 | 1.33 |
| C20:0-LPC      | 2.8(1.9;3.2)         | 2.1(1.7;2.5)        | 0.03  | 0.25 | 0.75 |
| C26:0-LPC      | 0.49(0.42;0.52)      | 0.39(0.36;0.44)     | 0.04  | 0.25 | 0.80 |
| C5DC\C6OH      | 0.043(0.034;0.048)   | 0.029(0.027;0.041)  | 0.04  | 0.25 | 0.67 |
| Leu\Ile\Pro-OH | 160(154;188)         | 209(177;229)        | 0.04  | 0.25 | 1.31 |
| C6             | 0.004(0.003;0.005)   | 0.003(0.002;0.0032) | 0.04  | 0.25 | 0.75 |
| C14:2          | 0.007(0.0062;0.0087) | 0.006(0.005;0.007)  | 0.05  | 0.25 | 0.86 |

Table S5. Parameters of the logistic regression model for the diagnosis of ischemia/hypoxia after 3 hours. Coefficient  $\beta$ , confidence interval CI  $\beta$ , Wald criteria Z, coefficient zero-probability P are provided.

| Variable             | $\beta$               | CI $\beta$                                    | Z     | P    |
|----------------------|-----------------------|-----------------------------------------------|-------|------|
| Intercept            | -6.64                 | -14.06 - -2.52                                | -2.43 | 0.02 |
| Glycine <sup>2</sup> | $7.37 \times 10^{-5}$ | $3.01 \times 10^{-5}$ - $1.56 \times 10^{-4}$ | 2.49  | 0.01 |

Table S6. Parameters of the logistic regression model for the diagnosis of ischemia/hypoxia after 6 hours. Coefficient  $\beta$ , confidence interval CI  $\beta$ , Wald criteria Z, coefficient zero-probability P are provided

| Variable             | $\beta$               | CI $\beta$                                    | Z     | P     |
|----------------------|-----------------------|-----------------------------------------------|-------|-------|
| Intercept            | -9.13                 | -23.50 - -3.14                                | -1.96 | 0.05  |
| Glycine <sup>2</sup> | $9.54 \times 10^{-5}$ | $3.36 \times 10^{-5}$ - $2.43 \times 10^{-4}$ | 1.98  | 0.048 |

Table S7. MS parameters used for FIA-MS/MS analysis by NeoBase™ 2 Non-derivatized MSMS kit. For each compound, MRM transition (Q1 and Q3), entrance voltage, collision cell lens 2, collision energy, and dwell time are shown. IS - internal standard.

| Compound          | Q1    | Q3    | Entrance voltage | Dwell time | Collision Cell Lens 2 | Collision Energy |
|-------------------|-------|-------|------------------|------------|-----------------------|------------------|
| Gly               | 76    | 30    | 30               | 15         | -100                  | -50              |
| Gly IS            | 78    | 32    | 30               | 15         | -100                  | -50              |
| Ala               | 90,1  | 44    | 30               | 15         | -100                  | -50              |
| Ala IS            | 93,1  | 47,1  | 30               | 15         | -100                  | -50              |
| Pro               | 116,1 | 70,1  | 30               | 15         | -100                  | -50              |
| Pro IS            | 121,1 | 74,1  | 30               | 15         | -100                  | -50              |
| Val               | 118,1 | 72,1  | 30               | 15         | -100                  | -50              |
| Val IS            | 124,1 | 77,1  | 30               | 15         | -100                  | -50              |
| Leu\Ile\Pro-OH    | 132,1 | 86,1  | 30               | 15         | -100                  | -50              |
| Leu\Ile\Pro-OH IS | 135,1 | 89,1  | 30               | 15         | -100                  | -50              |
| Orn               | 133,1 | 70,1  | 30               | 15         | -100                  | -50              |
| Orn IS            | 139,1 | 76,1  | 30               | 15         | -100                  | -50              |
| Gln\Lys           | 147,1 | 84    | 30               | 15         | -100                  | -50              |
| Glu               | 148,1 | 84    | 30               | 15         | -100                  | -50              |
| Gln\Lys IS        | 152,1 | 88,1  | 30               | 15         | -100                  | -50              |
| Met               | 150,1 | 104,1 | 30               | 15         | -100                  | -50              |
| Met IS            | 153,1 | 107,1 | 30               | 15         | -100                  | -50              |
| SA                | 155,1 | 109,1 | 30               | 15         | -100                  | -50              |
| SA IS             | 160,1 | 114,1 | 30               | 15         | -100                  | -50              |
| Phe               | 166,1 | 120,1 | 30               | 15         | -100                  | -50              |
| Phe IS            | 172,1 | 126,1 | 30               | 15         | -100                  | -50              |
| Arg               | 175,1 | 70,1  | 30               | 15         | -100                  | -50              |
| Arg IS            | 180,1 | 75,1  | 30               | 15         | -100                  | -50              |
| Cit               | 176,1 | 113,1 | 30               | 15         | -100                  | -50              |
| Cit IS            | 178,1 | 115,1 | 30               | 15         | -100                  | -50              |
| Tyr               | 182,1 | 136,1 | 30               | 15         | -100                  | -50              |
| Tyr IS            | 188,1 | 142,1 | 30               | 15         | -100                  | -50              |

|                      |       |       |    |    |      |     |
|----------------------|-------|-------|----|----|------|-----|
| D-ADO                | 252,1 | 136,1 | 30 | 15 | -100 | -50 |
| D-ADO IS             | 257,1 | 136,1 | 30 | 15 | -100 | -50 |
| ADO                  | 268,1 | 136,1 | 30 | 15 | -100 | -50 |
| ADO IS               | 273,1 | 136,1 | 30 | 15 | -100 | -50 |
| ASA anhydride I + II | 273,1 | 70,1  | 30 | 15 | -100 | -50 |
| ASA                  | 291,1 | 70,1  | 30 | 15 | -100 | -50 |
| C0                   | 162,1 | 103   | 30 | 15 | -100 | -50 |
| C0 IS                | 171,2 | 103   | 30 | 15 | -100 | -50 |
| C2                   | 204,1 | 85    | 30 | 15 | -100 | -50 |
| C2 IS                | 207,1 | 85    | 30 | 15 | -100 | -50 |
| C3                   | 218,1 | 85    | 30 | 15 | -100 | -50 |
| C3 IS                | 221,2 | 85    | 30 | 15 | -100 | -50 |
| C3DC\C4OH            | 248,1 | 85    | 30 | 15 | -100 | -50 |
| C4                   | 232,2 | 85    | 30 | 15 | -100 | -50 |
| C4 IS                | 235,2 | 85    | 30 | 15 | -100 | -50 |
| C5:1                 | 244,2 | 85    | 30 | 15 | -100 | -50 |
| C5                   | 246,2 | 85    | 30 | 15 | -100 | -50 |
| C4DC\C5OH            | 262,2 | 85    | 30 | 15 | -100 | -50 |
| C5 IS                | 255,2 | 85    | 30 | 15 | -100 | -50 |
| C6                   | 260,2 | 85    | 30 | 15 | -100 | -50 |
| C6 IS                | 263,2 | 85    | 30 | 15 | -100 | -50 |
| C5DC\C6OH            | 276,2 | 85    | 30 | 15 | -100 | -50 |
| C6DC                 | 290,2 | 85    | 30 | 15 | -100 | -50 |
| C5DC\C6OH IS         | 282,2 | 85    | 30 | 15 | -100 | -50 |
| C8:1                 | 286,2 | 85    | 30 | 15 | -100 | -50 |
| C8                   | 288,2 | 85    | 30 | 15 | -100 | -50 |
| C8 IS                | 291,2 | 85    | 30 | 15 | -100 | -50 |
| C10:2                | 312,2 | 85    | 30 | 15 | -100 | -50 |
| C10:1                | 314,2 | 85    | 30 | 15 | -100 | -50 |
| C10                  | 316,2 | 85    | 30 | 15 | -100 | -50 |
| C10 IS               | 319,3 | 85    | 30 | 15 | -100 | -50 |
| C12:1                | 342,3 | 85    | 30 | 15 | -100 | -50 |
| C12                  | 344,3 | 85    | 30 | 15 | -100 | -50 |
| C12 IS               | 347,3 | 85    | 30 | 15 | -100 | -50 |
| C14:2                | 368,3 | 85    | 30 | 15 | -100 | -50 |
| C14:1                | 370,3 | 85    | 30 | 15 | -100 | -50 |
| C14                  | 372,3 | 85    | 30 | 15 | -100 | -50 |
| C14OH                | 388,3 | 85    | 30 | 15 | -100 | -50 |
| C14 IS               | 375,3 | 85    | 30 | 15 | -100 | -50 |
| C16:1                | 398,3 | 85    | 30 | 15 | -100 | -50 |
| C16                  | 400,3 | 85    | 30 | 15 | -100 | -50 |
| C16:1OH\C17          | 414,3 | 85    | 30 | 15 | -100 | -50 |
| C16OH                | 416,3 | 85    | 30 | 15 | -100 | -50 |
| C16 IS               | 403,4 | 85    | 30 | 15 | -100 | -50 |
| C18:2                | 424,3 | 85    | 30 | 15 | -100 | -50 |
| C18:1                | 426,4 | 85    | 30 | 15 | -100 | -50 |

|              |       |       |    |    |      |     |
|--------------|-------|-------|----|----|------|-----|
| C18          | 428,4 | 85    | 30 | 15 | -100 | -50 |
| C18:2OH      | 440,3 | 85    | 30 | 15 | -100 | -50 |
| C18:1OH      | 442,4 | 85    | 30 | 15 | -100 | -50 |
| C18OH        | 444,4 | 85    | 30 | 15 | -100 | -50 |
| C18 IS       | 431,4 | 85    | 30 | 15 | -100 | -50 |
| C20          | 456,4 | 85    | 30 | 15 | -100 | -50 |
| C22          | 484,4 | 85    | 30 | 15 | -100 | -50 |
| C24          | 512,5 | 85    | 30 | 15 | -100 | -50 |
| C26          | 540,5 | 85    | 30 | 15 | -100 | -50 |
| C26 IS       | 543,5 | 85    | 30 | 15 | -100 | -50 |
| C20:0-LPC    | 552,4 | 104,1 | 30 | 15 | -100 | -50 |
| C22:0-LPC    | 580,4 | 104,1 | 30 | 15 | -100 | -50 |
| C24:0-LPC    | 608,5 | 104,1 | 30 | 15 | -100 | -50 |
| C26:0-LPC    | 636,5 | 104,1 | 30 | 15 | -100 | -50 |
| C26:0-LPC IS | 640,5 | 104,1 | 30 | 15 | -100 | -50 |
