# Supplementary material for: Metabolite Biomarkers for Early Ischemic Hypoxic Encephalopathy: An Experimental Study Using the NeoBase 2 MSMS Kit in a Rat Model
Source: Preprints.org preprint supplement (doi:10.20944/preprints202312.0281.v1), 2023-12-05
Supplement: Supplementary file 1 [file supplementary]

## Sheet: supplementary_with_group
case	group	Ion Source	Experiment	Analyte Name	Sample Name	Sample ID	Sample Type	Scan Type	Mass Transition Q1/Q3	Analyte Type	Internal Standard	Internal Standard Concentration	Measured Value	Peak Area	Peak Height	Qualifier / Quantifier _x000D_ Area Ratios	Qualifier / Quantifier _x000D_ Height Ratios	Internal Standard Peak Area	Internal Standard Peak Height	Smoothing	Retention Time Search Window (min)	Retention Time	Thresholds	Integrate By	Target Value	Low Limit	High Limit
IS	IS	ESI1	1	Ala	sample0001_132128	IS	IS	MRM+	90.10/44.00	Qualifier	Ala IS	0	2.814	9979	346	0	0	485255	13771	Savitzky-Golay,7,2	0.13/0.80	0.557	NBS: ISConc=115; Initial: LimitLow=0, LimitHigh=10000; Retest: LimitLow=0, LimitHigh=10000; Recall: LimitLow=0, LimitHigh=10000; Recall retest: LimitLow=0, LimitHigh=10000; LC: TargetConc=479, Stdev=57; HC: TargetConc=967, Stdev=116	Peak Area	0	0	0
IS	IS	ESI1	1	Ala IS	sample0001_132128	IS	IS	MRM+	93.10/47.10	IS		115	0	485255	13771	0	0	0	0	Savitzky-Golay,7,2	0.13/0.80	0.323	NBS: Internal Standard;	Peak Area	0	0	0
IS	IS	ESI1	1	Arg	sample0001_132128	IS	IS	MRM+	175.10/70.10	Qualifier	Arg IS	0	0.322	44322	1411	0	0	6586750	174257	Savitzky-Golay,7,2	0.13/0.80	0.616	NBS: ISConc=47.4; Initial: LimitLow=0, LimitHigh=70; Retest: LimitLow=0, LimitHigh=70; Recall: LimitLow=0, LimitHigh=70; Recall retest: LimitLow=0, LimitHigh=70; LC: TargetConc=24.2, Stdev=2.9; HC: TargetConc=136, Stdev=16	Peak Area	0	0	0
IS	IS	ESI1	1	Arg IS	sample0001_132128	IS	IS	MRM+	180.10/75.10	IS		47.4	0	6586750	174257	0	0	0	0	Savitzky-Golay,7,2	0.13/0.80	0.499	NBS: Internal Standard;	Peak Area	0	0	0
IS	IS	ESI1	1	Cit	sample0001_132128	IS	IS	MRM+	176.10/113.10	Qualifier	Cit IS	0	0.269	8373	365	0	0	2881950	79258	Savitzky-Golay,7,2	0.13/0.80	0.352	NBS: ISConc=81.8; Initial: LimitLow=0, LimitHigh=80; Retest: LimitLow=0, LimitHigh=80; Recall: LimitLow=0, LimitHigh=80; Recall retest: LimitLow=0, LimitHigh=80; LC: TargetConc=33.1, Stdev=4; HC: TargetConc=147, Stdev=18	Peak Area	0	0	0
IS	IS	ESI1	1	Cit IS	sample0001_132128	IS	IS	MRM+	178.10/115.10	IS		81.8	0	2881950	79258	0	0	0	0	Savitzky-Golay,7,2	0.13/0.80	0.499	NBS: Internal Standard;	Peak Area	0	0	0
IS	IS	ESI1	1	Gln\Lys	sample0001_132128	IS	IS	MRM+	147.10/84.00	Qualifier	Gln\Lys IS	0	1.114	68644	2252	0	0	5508177	159401	Savitzky-Golay,7,2	0.13/0.80	0.499	NBS: ISConc=99.3; LC: TargetConc=635, Stdev=76; HC: TargetConc=1350, Stdev=160	Peak Area	0	0	0
IS	IS	ESI1	1	Gln\Lys IS	sample0001_132128	IS	IS	MRM+	152.10/88.10	IS		99.3	0	5508177	159401	0	0	0	0	Savitzky-Golay,7,2	0.13/0.80	0.469	NBS: Internal Standard;	Peak Area	0	0	0
IS	IS	ESI1	1	Glu	sample0001_132128	IS	IS	MRM+	148.10/84.00	Qualifier	Gln\Lys IS	0	0.231	12832	398	0	0	5508177	159401	Savitzky-Golay,7,2	0.13/0.80	0.499	NBS: ISConc=-1;	Peak Area	0	0	0
IS	IS	ESI1	1	Gly	sample0001_132128	IS	IS	MRM+	76.00/30.00	Qualifier	Gly IS	0	35.547	37155	1097	0	0	624256	17304	Savitzky-Golay,7,2	0.13/0.80	0.557	NBS: ISConc=553; LC: TargetConc=549, Stdev=66; HC: TargetConc=1320, Stdev=160	Peak Area	0	0	0
IS	IS	ESI1	1	Gly IS	sample0001_132128	IS	IS	MRM+	78.00/32.00	IS		553	0	624256	17304	0	0	0	0	Savitzky-Golay,7,2	0.13/0.80	0.381	NBS: Internal Standard;	Peak Area	0	0	0
IS	IS	ESI1	1	Leu\Ile\Pro-OH	sample0001_132128	IS	IS	MRM+	132.10/86.10	Qualifier	Leu\Ile\Pro-OH IS	0	0.639	27626	919	0	0	4411462	121661	Savitzky-Golay,7,2	0.13/0.80	0.733	NBS: ISConc=101; Initial: LimitLow=0, LimitHigh=380; Retest: LimitLow=0, LimitHigh=380; Recall: LimitLow=0, LimitHigh=380; Recall retest: LimitLow=0, LimitHigh=380; LC: TargetConc=183, Stdev=22; HC: TargetConc=772, Stdev=93	Peak Area	0	0	0
IS	IS	ESI1	1	Leu\Ile\Pro-OH IS	sample0001_132128	IS	IS	MRM+	135.10/89.10	IS		101	0	4411462	121661	0	0	0	0	Savitzky-Golay,7,2	0.13/0.80	0.323	NBS: Internal Standard;	Peak Area	0	0	0
IS	IS	ESI1	1	Met	sample0001_132128	IS	IS	MRM+	150.10/104.10	Qualifier	Met IS	0	1.078	19612	642	0	0	2104414	57309	Savitzky-Golay,7,2	0.13/0.80	0.323	NBS: ISConc=99.7; Initial: LimitLow=7, LimitHigh=80; Retest: LimitLow=7, LimitHigh=80; Recall: LimitLow=7, LimitHigh=80; Recall retest: LimitLow=7, LimitHigh=80; LC: TargetConc=36, Stdev=4.3; HC: TargetConc=177, Stdev=21	Peak Area	0	0	0
IS	IS	ESI1	1	Met IS	sample0001_132128	IS	IS	MRM+	153.10/107.10	IS		99.7	0	2104414	57309	0	0	0	0	Savitzky-Golay,7,2	0.13/0.80	0.293	NBS: Internal Standard;	Peak Area	0	0	0
IS	IS	ESI1	1	Orn	sample0001_132128	IS	IS	MRM+	133.10/70.10	Qualifier	Orn IS	0	2.941	169318	5382	0	0	6275043	167576	Savitzky-Golay,7,2	0.13/0.80	0.763	NBS: ISConc=109; LC: TargetConc=154, Stdev=18; HC: TargetConc=488, Stdev=59	Peak Area	0	0	0
IS	IS	ESI1	1	Orn IS	sample0001_132128	IS	IS	MRM+	139.10/76.10	IS		109	0	6275043	167576	0	0	0	0	Savitzky-Golay,7,2	0.13/0.80	0.44	NBS: Internal Standard;	Peak Area	0	0	0
IS	IS	ESI1	1	Phe	sample0001_132128	IS	IS	MRM+	166.10/120.10	Qualifier	Phe IS	0	0.165	12327	448	0	0	5785767	160153	Savitzky-Golay,7,2	0.13/0.80	0.381	NBS: ISConc=71.8; Initial: LimitLow=0, LimitHigh=120; Retest: LimitLow=0, LimitHigh=120; Recall: LimitLow=0, LimitHigh=120; Recall retest: LimitLow=0, LimitHigh=120; LC: TargetConc=79.4, Stdev=9.5; HC: TargetConc=264, Stdev=32	Peak Area	0	0	0
IS	IS	ESI1	1	Phe IS	sample0001_132128	IS	IS	MRM+	172.10/126.10	IS		71.8	0	5785767	160153	0	0	0	0	Savitzky-Golay,7,2	0.13/0.80	0.381	NBS: Internal Standard;	Peak Area	0	0	0
IS	IS	ESI1	1	Pro	sample0001_132128	IS	IS	MRM+	116.10/70.10	Qualifier	Pro IS	0	1.48	114830	3515	0	0	6077987	174065	Savitzky-Golay,7,2	0.13/0.80	0.352	NBS: ISConc=88; LC: TargetConc=235, Stdev=28; HC: TargetConc=683, Stdev=82	Peak Area	0	0	0
IS	IS	ESI1	1	Pro IS	sample0001_132128	IS	IS	MRM+	121.10/74.10	IS		88	0	6077987	174065	0	0	0	0	Savitzky-Golay,7,2	0.13/0.80	0.499	NBS: Internal Standard;	Peak Area	0	0	0
IS	IS	ESI1	1	Tyr	sample0001_132128	IS	IS	MRM+	182.10/136.10	Qualifier	Tyr IS	0	0.707	14436	500	0	0	2882198	76960	Savitzky-Golay,7,2	0.13/0.80	0.205	NBS: ISConc=113; LC: TargetConc=136, Stdev=16; HC: TargetConc=549, Stdev=66	Peak Area	0	0	0
IS	IS	ESI1	1	Tyr IS	sample0001_132128	IS	IS	MRM+	188.10/142.10	IS		113	0	2882198	76960	0	0	0	0	Savitzky-Golay,7,2	0.13/0.80	0.469	NBS: Internal Standard;	Peak Area	0	0	0
IS	IS	ESI1	1	Val	sample0001_132128	IS	IS	MRM+	118.10/72.10	Qualifier	Val IS	0	2.761	77346	2276	0	0	3389117	95322	Savitzky-Golay,7,2	0.13/0.80	0.352	NBS: ISConc=108; LC: TargetConc=213, Stdev=26; HC: TargetConc=470, Stdev=56	Peak Area	0	0	0
IS	IS	ESI1	1	Val IS	sample0001_132128	IS	IS	MRM+	124.10/77.10	IS		108	0	3389117	95322	0	0	0	0	Savitzky-Golay,7,2	0.13/0.80	0.411	NBS: Internal Standard;	Peak Area	0	0	0
IS	IS	ESI1	1	C0	sample0001_132128	IS	IS	MRM+	162.10/103.00	Qualifier	C0 IS	0	0.25	16753	605	0	0	987117	27652	Savitzky-Golay,7,2	0.13/0.80	0.587	NBS: ISConc=11.5; Initial: LimitLow=8, LimitHigh=90; Retest: LimitLow=8, LimitHigh=90; Recall: LimitLow=8, LimitHigh=90; Recall retest: LimitLow=8, LimitHigh=90; LC: TargetConc=41, Stdev=4.9; HC: TargetConc=151, Stdev=18	Peak Area	0	0	0
IS	IS	ESI1	1	C0 IS	sample0001_132128	IS	IS	MRM+	171.20/103.00	IS		11.5	0	987117	27652	0	0	0	0	Savitzky-Golay,7,2	0.13/0.80	0.381	NBS: Internal Standard;	Peak Area	0	0	0
IS	IS	ESI1	1	C2	sample0001_132128	IS	IS	MRM+	204.10/85.00	Qualifier	C2 IS	0	0.059	15203	500	0	0	1361106	37569	Savitzky-Golay,7,2	0.13/0.80	0.235	NBS: ISConc=4.78; Initial: LimitLow=0, LimitHigh=115; Retest: LimitLow=0, LimitHigh=115; Recall: LimitLow=0, LimitHigh=115; Recall retest: LimitLow=0, LimitHigh=115; LC: TargetConc=27.6, Stdev=3.3; HC: TargetConc=82.4, Stdev=9.9	Peak Area	0	0	0
IS	IS	ESI1	1	C2 IS	sample0001_132128	IS	IS	MRM+	207.10/85.00	IS		4.78	0	1361106	37569	0	0	0	0	Savitzky-Golay,7,2	0.13/0.80	0.411	NBS: Internal Standard;	Peak Area	0	0	0
IS	IS	ESI1	1	C3	sample0001_132128	IS	IS	MRM+	218.10/85.00	Qualifier	C3 IS	0	0.013	4191	202	0	0	639256	19273	Savitzky-Golay,7,2	0.13/0.80	0.704	NBS: ISConc=2.03; Initial: LimitLow=0, LimitHigh=6.8; Retest: LimitLow=0, LimitHigh=6.8; Recall: LimitLow=0, LimitHigh=6.8; Recall retest: LimitLow=0, LimitHigh=6.8; LC: TargetConc=4.63, Stdev=0.56; HC: TargetConc=13.3, Stdev=1.6	Peak Area	0	0	0
IS	IS	ESI1	1	C3 IS	sample0001_132128	IS	IS	MRM+	221.20/85.00	IS		2.03	0	639256	19273	0	0	0	0	Savitzky-Golay,7,2	0.13/0.80	0.499	NBS: Internal Standard;	Peak Area	0	0	0
IS	IS	ESI1	1	C3DC\C4OH	sample0001_132128	IS	IS	MRM+	248.10/85.00	Qualifier	C4 IS	0	0.003	1068	75	0	0	595367	17294	Savitzky-Golay,7,2	0.13/0.80	0.235	NBS: ISConc=-1; Initial: LimitLow=0, LimitHigh=10; Retest: LimitLow=0.04, LimitHigh=10; Recall: LimitLow=0.04, LimitHigh=10; Recall retest: LimitLow=0.04, LimitHigh=10	Peak Area	0	0	0
IS	IS	ESI1	1	C4	sample0001_132128	IS	IS	MRM+	232.20/85.00	Qualifier	C4 IS	0	0.144	59266	1847	0	0	595367	17294	Savitzky-Golay,7,2	0.13/0.80	0.293	NBS: ISConc=1.45; Initial: LimitLow=0, LimitHigh=1.5; Retest: LimitLow=0, LimitHigh=1.5; Recall: LimitLow=0, LimitHigh=1.5; Recall retest: LimitLow=0, LimitHigh=1.5; LC: TargetConc=0.74, Stdev=0.1; HC: TargetConc=2.74, Stdev=0.33	Peak Area	0	0	0
IS	IS	ESI1	1	C4 IS	sample0001_132128	IS	IS	MRM+	235.20/85.00	IS		1.45	0	595367	17294	0	0	0	0	Savitzky-Golay,7,2	0.13/0.80	0.352	NBS: Internal Standard;	Peak Area	0	0	0
IS	IS	ESI1	1	C4DC\C5OH	sample0001_132128	IS	IS	MRM+	262.20/85.00	Qualifier	C5 IS	0	0.008	3629	194	0	0	726993	19923	Savitzky-Golay,7,2	0.13/0.80	0.147	NBS: ISConc=-1; Initial: LimitLow=0, LimitHigh=0.5; Retest: LimitLow=0, LimitHigh=0.5; Recall: LimitLow=0, LimitHigh=0.5; Recall retest: LimitLow=0, LimitHigh=0.5	Peak Area	0	0	0
IS	IS	ESI1	1	C5	sample0001_132128	IS	IS	MRM+	246.20/85.00	Qualifier	C5 IS	0	0.003	1701	123	0	0	726993	19923	Savitzky-Golay,7,2	0.13/0.80	0.587	NBS: ISConc=1.52; Initial: LimitLow=0, LimitHigh=0.56; Retest: LimitLow=0, LimitHigh=0.56; Recall: LimitLow=0, LimitHigh=0.56; Recall retest: LimitLow=0, LimitHigh=0.56; LC: TargetConc=0.63, Stdev=0.08; HC: TargetConc=2.46, Stdev=0.3	Peak Area	0	0	0
IS	IS	ESI1	1	C5 IS	sample0001_132128	IS	IS	MRM+	255.20/85.00	IS		1.52	0	726993	19923	0	0	0	0	Savitzky-Golay,7,2	0.13/0.80	0.499	NBS: Internal Standard;	Peak Area	0	0	0
IS	IS	ESI1	1	C5:1	sample0001_132128	IS	IS	MRM+	244.20/85.00	Qualifier	C5 IS	0	0.001	550	42	0	0	726993	19923	Savitzky-Golay,7,2	0.13/0.80	0.235	NBS: ISConc=-1; Initial: LimitLow=0, LimitHigh=0.15; Retest: LimitLow=0, LimitHigh=0.15; Recall: LimitLow=0, LimitHigh=0.15; Recall retest: LimitLow=0, LimitHigh=0.15	Peak Area	0	0	0
IS	IS	ESI1	1	C5DC\C6OH	sample0001_132128	IS	IS	MRM+	276.20/85.00	Qualifier	C5DC\C6OH IS	0	0.003	712	42	0	0	390828	10818	Savitzky-Golay,7,2	0.13/0.80	0.205	NBS: ISConc=1.49; Initial: LimitLow=0, LimitHigh=0.3; Retest: LimitLow=0, LimitHigh=0.3; Recall: LimitLow=0, LimitHigh=0.3; Recall retest: LimitLow=0, LimitHigh=0.3; LC: TargetConc=0.39, Stdev=0.09; HC: TargetConc=1.98, Stdev=0.24	Peak Area	0	0	0
IS	IS	ESI1	1	C5DC\C6OH IS	sample0001_132128	IS	IS	MRM+	282.20/85.00	IS		1.49	0	390828	10818	0	0	0	0	Savitzky-Golay,7,2	0.13/0.80	0.352	NBS: Internal Standard;	Peak Area	0	0	0
IS	IS	ESI1	1	C6	sample0001_132128	IS	IS	MRM+	260.20/85.00	Qualifier	C6 IS	0	0.001	438	38	0	0	764662	21737	Savitzky-Golay,7,2	0.13/0.80	0.587	NBS: ISConc=1.03; Initial: LimitLow=0, LimitHigh=0.2; Retest: LimitLow=0, LimitHigh=0.2; Recall: LimitLow=0, LimitHigh=0.2; Recall retest: LimitLow=0, LimitHigh=0.2; LC: TargetConc=0.29, Stdev=0.09; HC: TargetConc=1.4, Stdev=0.17	Peak Area	0	0	0
IS	IS	ESI1	1	C6 IS	sample0001_132128	IS	IS	MRM+	263.20/85.00	IS		1.03	0	764662	21737	0	0	0	0	Savitzky-Golay,7,2	0.13/0.80	0.528	NBS: Internal Standard;	Peak Area	0	0	0
IS	IS	ESI1	1	C6DC	sample0001_132128	IS	IS	MRM+	290.20/85.00	Qualifier	C5DC\C6OH IS	0	0.013	3437	120	0	0	390828	10818	Savitzky-Golay,7,2	0.13/0.80	0.147	NBS: ISConc=-1;	Peak Area	0	0	0
IS	IS	ESI1	1	C8	sample0001_132128	IS	IS	MRM+	288.20/85.00	Qualifier	C8 IS	0	0.001	617	83	0	0	594172	16195	Savitzky-Golay,7,2	0.13/0.80	0.147	NBS: ISConc=1.04; Initial: LimitLow=0, LimitHigh=0.4; Retest: LimitLow=0, LimitHigh=0.4; Recall: LimitLow=0, LimitHigh=0.4; Recall retest: LimitLow=0, LimitHigh=0.4; LC: TargetConc=0.55, Stdev=0.08; HC: TargetConc=2.76, Stdev=0.33	Peak Area	0	0	0
IS	IS	ESI1	1	C8 IS	sample0001_132128	IS	IS	MRM+	291.20/85.00	IS		1.04	0	594172	16195	0	0	0	0	Savitzky-Golay,7,2	0.13/0.80	0.469	NBS: Internal Standard;	Peak Area	0	0	0
IS	IS	ESI1	1	C8:1	sample0001_132128	IS	IS	MRM+	286.20/85.00	Qualifier	C8 IS	0	0.001	561	43	0	0	594172	16195	Savitzky-Golay,7,2	0.13/0.80	0.675	NBS: ISConc=-1;	Peak Area	0	0	0
IS	IS	ESI1	1	C10	sample0001_132128	IS	IS	MRM+	316.20/85.00	Qualifier	C10 IS	0	0.002	1138	95	0	0	522610	15481	Savitzky-Golay,7,2	0.13/0.80	0.235	NBS: ISConc=0.91; Initial: LimitLow=0, LimitHigh=0.29; Retest: LimitLow=0, LimitHigh=0.29; Recall: LimitLow=0, LimitHigh=0.29; Recall retest: LimitLow=0, LimitHigh=0.29; LC: TargetConc=0.31, Stdev=0.09; HC: TargetConc=2.02, Stdev=0.24	Peak Area	0	0	0
IS	IS	ESI1	1	C10 IS	sample0001_132128	IS	IS	MRM+	319.30/85.00	IS		0.91	0	522610	15481	0	0	0	0	Savitzky-Golay,7,2	0.13/0.80	0.469	NBS: Internal Standard;	Peak Area	0	0	0
IS	IS	ESI1	1	C10:1	sample0001_132128	IS	IS	MRM+	314.20/85.00	Qualifier	C10 IS	0	0	0	0	0	0	522610	15481	Savitzky-Golay,7,2	0.13/0.80	0.763	NBS: ISConc=-1; Initial: LimitLow=0, LimitHigh=0.3; Retest: LimitLow=0, LimitHigh=0.3; Recall: LimitLow=0, LimitHigh=0.3; Recall retest: LimitLow=0, LimitHigh=0.3	Peak Area	0	0	0
IS	IS	ESI1	1	C10:2	sample0001_132128	IS	IS	MRM+	312.20/85.00	Qualifier	C10 IS	0	0	253	38	0	0	522610	15481	Savitzky-Golay,7,2	0.13/0.80	0.733	NBS: ISConc=-1; Initial: LimitLow=0, LimitHigh=100; Retest: LimitLow=0, LimitHigh=100; Recall: LimitLow=0, LimitHigh=100; Recall retest: LimitLow=0, LimitHigh=100	Peak Area	0	0	0
IS	IS	ESI1	1	C12	sample0001_132128	IS	IS	MRM+	344.30/85.00	Qualifier	C12 IS	0	0.002	996	50	0	0	584666	16603	Savitzky-Golay,7,2	0.13/0.80	0.469	NBS: ISConc=1; Initial: LimitLow=0, LimitHigh=0.33; Retest: LimitLow=0, LimitHigh=0.33; Recall: LimitLow=0, LimitHigh=0.33; Recall retest: LimitLow=0, LimitHigh=0.33; LC: TargetConc=0.28, Stdev=0.09; HC: TargetConc=1.36, Stdev=0.16	Peak Area	0	0	0
IS	IS	ESI1	1	C12 IS	sample0001_132128	IS	IS	MRM+	347.30/85.00	IS		1	0	584666	16603	0	0	0	0	Savitzky-Golay,7,2	0.13/0.80	0.293	NBS: Internal Standard;	Peak Area	0	0	0
IS	IS	ESI1	1	C12:1	sample0001_132128	IS	IS	MRM+	342.30/85.00	Qualifier	C12 IS	0	0.001	626	57	0	0	584666	16603	Savitzky-Golay,7,2	0.13/0.80	0.557	NBS: ISConc=-1; Initial: LimitLow=0, LimitHigh=1000; Retest: LimitLow=0, LimitHigh=1000; Recall: LimitLow=0, LimitHigh=1000; Recall retest: LimitLow=0, LimitHigh=10000	Peak Area	0	0	0
IS	IS	ESI1	1	C14	sample0001_132128	IS	IS	MRM+	372.30/85.00	Qualifier	C14 IS	0	0.001	493	25	0	0	627690	18720	Savitzky-Golay,7,2	0.13/0.80	0.557	NBS: ISConc=1.02; Initial: LimitLow=0, LimitHigh=0.59; Retest: LimitLow=0, LimitHigh=0.59; Recall: LimitLow=0, LimitHigh=0.59; Recall retest: LimitLow=0, LimitHigh=0.59; LC: TargetConc=0.33, Stdev=0.09; HC: TargetConc=1.9, Stdev=0.23	Peak Area	0	0	0
IS	IS	ESI1	1	C14 IS	sample0001_132128	IS	IS	MRM+	375.30/85.00	IS		1.02	0	627690	18720	0	0	0	0	Savitzky-Golay,7,2	0.13/0.80	0.499	NBS: Internal Standard;	Peak Area	0	0	0
IS	IS	ESI1	1	C14:1	sample0001_132128	IS	IS	MRM+	370.30/85.00	Qualifier	C14 IS	0	0.001	492	73	0	0	627690	18720	Savitzky-Golay,7,2	0.13/0.80	0.147	NBS: ISConc=-1; Initial: LimitLow=0, LimitHigh=0.32; Retest: LimitLow=0, LimitHigh=0.32; Recall: LimitLow=0, LimitHigh=0.32; Recall retest: LimitLow=0, LimitHigh=0.32	Peak Area	0	0	0
IS	IS	ESI1	1	C14:2	sample0001_132128	IS	IS	MRM+	368.30/85.00	Qualifier	C14 IS	0	0	295	30	0	0	627690	18720	Savitzky-Golay,7,2	0.13/0.80	0.763	NBS: ISConc=-1;	Peak Area	0	0	0
IS	IS	ESI1	1	C14OH	sample0001_132128	IS	IS	MRM+	388.30/85.00	Qualifier	C14 IS	0	0	0	0	0	0	627690	18720	Savitzky-Golay,7,2	0.13/0.80	0.763	NBS: ISConc=-1; Initial: LimitLow=0, LimitHigh=0.2; Retest: LimitLow=0, LimitHigh=0.2; Recall: LimitLow=0, LimitHigh=0.2; Recall retest: LimitLow=0, LimitHigh=0.2	Peak Area	0	0	0
IS	IS	ESI1	1	C16	sample0001_132128	IS	IS	MRM+	400.30/85.00	Qualifier	C16 IS	0	0.007	3492	228	0	0	470395	13992	Savitzky-Golay,7,2	0.13/0.80	0.264	NBS: ISConc=0.89; Initial: LimitLow=0.3, LimitHigh=8.5; Retest: LimitLow=0.3, LimitHigh=8.5; Recall: LimitLow=0.3, LimitHigh=8.5; Recall retest: LimitLow=0.3, LimitHigh=8.5; LC: TargetConc=2.02, Stdev=0.24; HC: TargetConc=11.7, Stdev=1.4	Peak Area	0	0	0
IS	IS	ESI1	1	C16 IS	sample0001_132128	IS	IS	MRM+	403.40/85.00	IS		0.89	0	470395	13992	0	0	0	0	Savitzky-Golay,7,2	0.13/0.80	0.352	NBS: Internal Standard;	Peak Area	0	0	0
IS	IS	ESI1	1	C16:1	sample0001_132128	IS	IS	MRM+	398.30/85.00	Qualifier	C16 IS	0	0.001	395	24	0	0	470395	13992	Savitzky-Golay,7,2	0.13/0.80	0.557	NBS: ISConc=-1;	Peak Area	0	0	0
IS	IS	ESI1	1	C16OH	sample0001_132128	IS	IS	MRM+	416.30/85.00	Qualifier	C16 IS	0	0.002	859	40	0	0	470395	13992	Savitzky-Golay,7,2	0.13/0.80	0.557	NBS: ISConc=-1; Initial: LimitLow=0, LimitHigh=0.19; Retest: LimitLow=0, LimitHigh=0.19; Recall: LimitLow=0, LimitHigh=0.19; Recall retest: LimitLow=0, LimitHigh=0.19	Peak Area	0	0	0
IS	IS	ESI1	1	C16:1OH\C17	sample0001_132128	IS	IS	MRM+	414.30/85.00	Qualifier	C16 IS	0	0	0	0	0	0	470395	13992	Savitzky-Golay,7,2	0.13/0.80	0.763	NBS: ISConc=-1; Initial: LimitLow=0, LimitHigh=0.22; Retest: LimitLow=0, LimitHigh=0.22; Recall: LimitLow=0, LimitHigh=0.22; Recall retest: LimitLow=0, LimitHigh=0.22	Peak Area	0	0	0
IS	IS	ESI1	1	C18	sample0001_132128	IS	IS	MRM+	428.40/85.00	Qualifier	C18 IS	0	0.002	786	79	0	0	434918	14249	Savitzky-Golay,7,2	0.13/0.80	0.763	NBS: ISConc=0.92; Initial: LimitLow=0.13, LimitHigh=2.5; Retest: LimitLow=0.13, LimitHigh=2.5; Recall: LimitLow=0.13, LimitHigh=2.5; Recall retest: LimitLow=0.13, LimitHigh=2.5; LC: TargetConc=1.14, Stdev=0.14; HC: TargetConc=4.32, Stdev=0.52	Peak Area	0	0	0
IS	IS	ESI1	1	C18 IS	sample0001_132128	IS	IS	MRM+	431.40/85.00	IS		0.92	0	434918	14249	0	0	0	0	Savitzky-Golay,7,2	0.13/0.80	0.323	NBS: Internal Standard;	Peak Area	0	0	0
IS	IS	ESI1	1	C18:1	sample0001_132128	IS	IS	MRM+	426.40/85.00	Qualifier	C18 IS	0	0.002	788	40	0	0	434918	14249	Savitzky-Golay,7,2	0.13/0.80	0.616	NBS: ISConc=-1; Initial: LimitLow=0.15, LimitHigh=3.35; Retest: LimitLow=0.15, LimitHigh=3.35; Recall: LimitLow=0.15, LimitHigh=3.35; Recall retest: LimitLow=0.15, LimitHigh=3.35	Peak Area	0	0	0
IS	IS	ESI1	1	C18:2	sample0001_132128	IS	IS	MRM+	424.30/85.00	Qualifier	C18 IS	0	0.003	1352	141	0	0	434918	14249	Savitzky-Golay,7,2	0.13/0.80	0.147	NBS: ISConc=-1;	Peak Area	0	0	0
IS	IS	ESI1	1	C18OH	sample0001_132128	IS	IS	MRM+	444.40/85.00	Qualifier	C18 IS	0	0	142	21	0	0	434918	14249	Savitzky-Golay,7,2	0.13/0.80	0.323	NBS: ISConc=-1; Initial: LimitLow=0, LimitHigh=0.14; Retest: LimitLow=0, LimitHigh=0.14; Recall: LimitLow=0, LimitHigh=0.14; Recall retest: LimitLow=0, LimitHigh=0.14	Peak Area	0	0	0
IS	IS	ESI1	1	C18:1OH	sample0001_132128	IS	IS	MRM+	442.40/85.00	Qualifier	C18 IS	0	0.001	595	69	0	0	434918	14249	Savitzky-Golay,7,2	0.13/0.80	0.293	NBS: ISConc=-1; Initial: LimitLow=0, LimitHigh=0.16; Retest: LimitLow=0, LimitHigh=0.16; Recall: LimitLow=0, LimitHigh=0.16; Recall retest: LimitLow=0, LimitHigh=0.16	Peak Area	0	0	0
IS	IS	ESI1	1	C18:2OH	sample0001_132128	IS	IS	MRM+	440.30/85.00	Qualifier	C18 IS	0	0.001	384	36	0	0	434918	14249	Savitzky-Golay,7,2	0.13/0.80	0.147	NBS: ISConc=-1;	Peak Area	0	0	0
IS	IS	ESI1	1	C20	sample0001_132128	IS	IS	MRM+	456.40/85.00	Qualifier	C26 IS	0	0	18	0	0	0	100176	4384	Savitzky-Golay,7,2	0.13/0.80	0.763	NBS: ISConc=-1;	Peak Area	0	0	0
IS	IS	ESI1	1	C22	sample0001_132128	IS	IS	MRM+	484.40/85.00	Qualifier	C26 IS	0	0.005	484	33	0	0	100176	4384	Savitzky-Golay,7,2	0.13/0.80	0.499	NBS: ISConc=-1;	Peak Area	0	0	0
IS	IS	ESI1	1	C24	sample0001_132128	IS	IS	MRM+	512.50/85.00	Qualifier	C26 IS	0	0.005	497	66	0	0	100176	4384	Savitzky-Golay,7,2	0.13/0.80	0.557	NBS: ISConc=-1;	Peak Area	0	0	0
IS	IS	ESI1	1	C26	sample0001_132128	IS	IS	MRM+	540.50/85.00	Qualifier	C26 IS	0	0.002	142	21	0	0	100176	4384	Savitzky-Golay,7,2	0.13/0.80	0.352	NBS: ISConc=1.09; LC: TargetConc=0.61, Stdev=0.09; HC: TargetConc=1.66, Stdev=0.2	Peak Area	0	0	0
IS	IS	ESI1	1	C26 IS	sample0001_132128	IS	IS	MRM+	543.50/85.00	IS		1.09	0	100176	4384	0	0	0	0	Savitzky-Golay,7,2	0.13/0.80	0.147	NBS: Internal Standard;	Peak Area	0	0	0
IS	IS	ESI1	1	SA	sample0001_132128	IS	IS	MRM+	155.10/109.10	Qualifier	SA IS	0	0.202	17024	540	0	0	4885852	135787	Savitzky-Golay,7,2	0.13/0.80	0.411	NBS: ISConc=58.1; Initial: LimitLow=0, LimitHigh=2; Retest: LimitLow=0, LimitHigh=2; Recall: LimitLow=0, LimitHigh=2; Recall retest: LimitLow=0, LimitHigh=2; LC: TargetConc=2.57, Stdev=0.38; HC: TargetConc=10.4, Stdev=1.2	Peak Area	0	0	0
IS	IS	ESI1	1	SA IS	sample0001_132128	IS	IS	MRM+	160.10/114.10	IS		58.1	0	4885852	135787	0	0	0	0	Savitzky-Golay,7,2	0.13/0.80	0.499	NBS: Internal Standard;	Peak Area	0	0	0
IS	IS	ESI1	1	ADO	sample0001_132128	IS	IS	MRM+	268.10/136.10	Qualifier	ADO IS	0	0.006	2969	116	0	0	3518105	100974	Savitzky-Golay,7,2	0.13/0.80	0.147	NBS: ISConc=9.44; LC: TargetConc=2.51, Stdev=0.34; HC: TargetConc=6.91, Stdev=0.83	Peak Area	0	0	0
IS	IS	ESI1	1	ADO IS	sample0001_132128	IS	IS	MRM+	273.10/136.10	IS		9.44	0	3518105	100974	0	0	0	0	Savitzky-Golay,7,2	0.13/0.80	0.44	NBS: Internal Standard;	Peak Area	0	0	0
IS	IS	ESI1	1	D-ADO	sample0001_132128	IS	IS	MRM+	252.10/136.10	Qualifier	D-ADO IS	0	0.002	434	21	0	0	2773196	78501	Savitzky-Golay,7,2	0.13/0.80	0.587	NBS: ISConc=9.82;	Peak Area	0	0	0
IS	IS	ESI1	1	D-ADO IS	sample0001_132128	IS	IS	MRM+	257.10/136.10	IS		9.82	0	2773196	78501	0	0	0	0	Savitzky-Golay,7,2	0.13/0.80	0.381	NBS: Internal Standard;	Peak Area	0	0	0
IS	IS	ESI1	1	C20:0-LPC	sample0001_132128	IS	IS	MRM+	552.40/104.10	Qualifier	C26:0-LPC IS	0	0.024	277	42	0	0	51088	3220	Savitzky-Golay,7,2	0.13/0.80	0.205	NBS: ISConc=-1;	Peak Area	0	0	0
IS	IS	ESI1	1	C22:0-LPC	sample0001_132128	IS	IS	MRM+	580.40/104.10	Qualifier	C26:0-LPC IS	0	0	0	0	0	0	51088	3220	Savitzky-Golay,7,2	0.13/0.80	0.763	NBS: ISConc=-1;	Peak Area	0	0	0
IS	IS	ESI1	1	C24:0-LPC	sample0001_132128	IS	IS	MRM+	608.50/104.10	Qualifier	C26:0-LPC IS	0	0	0	0	0	0	51088	3220	Savitzky-Golay,7,2	0.13/0.80	0.763	NBS: ISConc=-1;	Peak Area	0	0	0
IS	IS	ESI1	1	C26:0-LPC	sample0001_132128	IS	IS	MRM+	636.50/104.10	Qualifier	C26:0-LPC IS	0	0.04	516	59	0	0	51088	3220	Savitzky-Golay,7,2	0.13/0.80	0.411	NBS: ISConc=4.4; LC: TargetConc=0.92, Stdev=0.11; HC: TargetConc=3.04, Stdev=0.36	Peak Area	0	0	0
IS	IS	ESI1	1	C26:0-LPC IS	sample0001_132128	IS	IS	MRM+	640.50/104.10	IS		4.4	0	51088	3220	0	0	0	0	Savitzky-Golay,7,2	0.13/0.80	0.147	NBS: Internal Standard;	Peak Area	0	0	0
IS	IS	ESI1	1	ASA	sample0001_132128	IS	IS	MRM+	291.10/70.10	Qualifier	Arg IS	0	0.301	41843	1312	0	0	6586750	174257	Savitzky-Golay,7,2	0.13/0.80	0.352	NBS: --	Peak Area	0	0	0
IS	IS	ESI1	1	ASA anhydride I + II	sample0001_132128	IS	IS	MRM+	273.10/70.10	Qualifier	Arg IS	0	0.011	1554	110	0	0	6586750	174257	Savitzky-Golay,7,2	0.13/0.80	0.352	NBS: --	Peak Area	0	0	0
IS	IS			ASATotal	sample0001_132128	IS	IS	N/A	0.00/0.00	Qualifier	Arg IS	0	0.315	43397	1422	0	0	6586750	174257	Savitzky-Golay,7,2	0.13/0.80	0	NBS: ISConc=-1; Initial: LimitLow=0, LimitHigh=1.5; Retest: LimitLow=0, LimitHigh=1.5; Recall: LimitLow=0, LimitHigh=1.5; Recall retest: LimitLow=0, LimitHigh=1.5; LC: TargetConc=2.22, Stdev=0.38; HC: TargetConc=39, Stdev=4.7	Peak Area	0	0	0
IS	IS	ESI1	1	Ala	sample0002_132441	IS	IS	MRM+	90.10/44.00	Qualifier	Ala IS	0	2.919	11105	353	0	0	520600	15114	Savitzky-Golay,7,2	0.13/0.80	0.587	NBS: ISConc=115; Initial: LimitLow=0, LimitHigh=10000; Retest: LimitLow=0, LimitHigh=10000; Recall: LimitLow=0, LimitHigh=10000; Recall retest: LimitLow=0, LimitHigh=10000; LC: TargetConc=479, Stdev=57; HC: TargetConc=967, Stdev=116	Peak Area	0	0	0
IS	IS	ESI1	1	Ala IS	sample0002_132441	IS	IS	MRM+	93.10/47.10	IS		115	0	520600	15114	0	0	0	0	Savitzky-Golay,7,2	0.13/0.80	0.264	NBS: Internal Standard;	Peak Area	0	0	0
IS	IS	ESI1	1	Arg	sample0002_132441	IS	IS	MRM+	175.10/70.10	Qualifier	Arg IS	0	0.16	23735	736	0	0	7108313	222295	Savitzky-Golay,7,2	0.13/0.80	0.587	NBS: ISConc=47.4; Initial: LimitLow=0, LimitHigh=70; Retest: LimitLow=0, LimitHigh=70; Recall: LimitLow=0, LimitHigh=70; Recall retest: LimitLow=0, LimitHigh=70; LC: TargetConc=24.2, Stdev=2.9; HC: TargetConc=136, Stdev=16	Peak Area	0	0	0
IS	IS	ESI1	1	Arg IS	sample0002_132441	IS	IS	MRM+	180.10/75.10	IS		47.4	0	7108313	222295	0	0	0	0	Savitzky-Golay,7,2	0.13/0.80	0.147	NBS: Internal Standard;	Peak Area	0	0	0
IS	IS	ESI1	1	Cit	sample0002_132441	IS	IS	MRM+	176.10/113.10	Qualifier	Cit IS	0	0.25	8792	361	0	0	3247961	94943	Savitzky-Golay,7,2	0.13/0.80	0.147	NBS: ISConc=81.8; Initial: LimitLow=0, LimitHigh=80; Retest: LimitLow=0, LimitHigh=80; Recall: LimitLow=0, LimitHigh=80; Recall retest: LimitLow=0, LimitHigh=80; LC: TargetConc=33.1, Stdev=4; HC: TargetConc=147, Stdev=18	Peak Area	0	0	0
IS	IS	ESI1	1	Cit IS	sample0002_132441	IS	IS	MRM+	178.10/115.10	IS		81.8	0	3247961	94943	0	0	0	0	Savitzky-Golay,7,2	0.13/0.80	0.293	NBS: Internal Standard;	Peak Area	0	0	0
IS	IS	ESI1	1	Gln\Lys	sample0002_132441	IS	IS	MRM+	147.10/84.00	Qualifier	Gln\Lys IS	0	0.298	21373	690	0	0	6401649	181109	Savitzky-Golay,7,2	0.13/0.80	0.499	NBS: ISConc=99.3; LC: TargetConc=635, Stdev=76; HC: TargetConc=1350, Stdev=160	Peak Area	0	0	0
IS	IS	ESI1	1	Gln\Lys IS	sample0002_132441	IS	IS	MRM+	152.10/88.10	IS		99.3	0	6401649	181109	0	0	0	0	Savitzky-Golay,7,2	0.13/0.80	0.352	NBS: Internal Standard;	Peak Area	0	0	0
IS	IS	ESI1	1	Glu	sample0002_132441	IS	IS	MRM+	148.10/84.00	Qualifier	Gln\Lys IS	0	0.101	6480	224	0	0	6401649	181109	Savitzky-Golay,7,2	0.13/0.80	0.557	NBS: ISConc=-1;	Peak Area	0	0	0
IS	IS	ESI1	1	Gly	sample0002_132441	IS	IS	MRM+	76.00/30.00	Qualifier	Gly IS	0	36.686	40234	1253	0	0	654994	20494	Savitzky-Golay,7,2	0.13/0.80	0.352	NBS: ISConc=553; LC: TargetConc=549, Stdev=66; HC: TargetConc=1320, Stdev=160	Peak Area	0	0	0
IS	IS	ESI1	1	Gly IS	sample0002_132441	IS	IS	MRM+	78.00/32.00	IS		553	0	654994	20494	0	0	0	0	Savitzky-Golay,7,2	0.13/0.80	0.264	NBS: Internal Standard;	Peak Area	0	0	0
IS	IS	ESI1	1	Leu\Ile\Pro-OH	sample0002_132441	IS	IS	MRM+	132.10/86.10	Qualifier	Leu\Ile\Pro-OH IS	0	0.428	18783	727	0	0	4473647	124074	Savitzky-Golay,7,2	0.13/0.80	0.323	NBS: ISConc=101; Initial: LimitLow=0, LimitHigh=380; Retest: LimitLow=0, LimitHigh=380; Recall: LimitLow=0, LimitHigh=380; Recall retest: LimitLow=0, LimitHigh=380; LC: TargetConc=183, Stdev=22; HC: TargetConc=772, Stdev=93	Peak Area	0	0	0
IS	IS	ESI1	1	Leu\Ile\Pro-OH IS	sample0002_132441	IS	IS	MRM+	135.10/89.10	IS		101	0	4473647	124074	0	0	0	0	Savitzky-Golay,7,2	0.13/0.80	0.323	NBS: Internal Standard;	Peak Area	0	0	0
IS	IS	ESI1	1	Met	sample0002_132441	IS	IS	MRM+	150.10/104.10	Qualifier	Met IS	0	1.009	20795	730	0	0	2384117	67828	Savitzky-Golay,7,2	0.13/0.80	0.411	NBS: ISConc=99.7; Initial: LimitLow=7, LimitHigh=80; Retest: LimitLow=7, LimitHigh=80; Recall: LimitLow=7, LimitHigh=80; Recall retest: LimitLow=7, LimitHigh=80; LC: TargetConc=36, Stdev=4.3; HC: TargetConc=177, Stdev=21	Peak Area	0	0	0
IS	IS	ESI1	1	Met IS	sample0002_132441	IS	IS	MRM+	153.10/107.10	IS		99.7	0	2384117	67828	0	0	0	0	Savitzky-Golay,7,2	0.13/0.80	0.293	NBS: Internal Standard;	Peak Area	0	0	0
IS	IS	ESI1	1	Orn	sample0002_132441	IS	IS	MRM+	133.10/70.10	Qualifier	Orn IS	0	0.778	47440	1614	0	0	6643300	198711	Savitzky-Golay,7,2	0.13/0.80	0.176	NBS: ISConc=109; LC: TargetConc=154, Stdev=18; HC: TargetConc=488, Stdev=59	Peak Area	0	0	0
IS	IS	ESI1	1	Orn IS	sample0002_132441	IS	IS	MRM+	139.10/76.10	IS		109	0	6643300	198711	0	0	0	0	Savitzky-Golay,7,2	0.13/0.80	0.147	NBS: Internal Standard;	Peak Area	0	0	0
IS	IS	ESI1	1	Phe	sample0002_132441	IS	IS	MRM+	166.10/120.10	Qualifier	Phe IS	0	0.065	4891	240	0	0	5872197	163837	Savitzky-Golay,7,2	0.13/0.80	0.264	NBS: ISConc=71.8; Initial: LimitLow=0, LimitHigh=120; Retest: LimitLow=0, LimitHigh=120; Recall: LimitLow=0, LimitHigh=120; Recall retest: LimitLow=0, LimitHigh=120; LC: TargetConc=79.4, Stdev=9.5; HC: TargetConc=264, Stdev=32	Peak Area	0	0	0
IS	IS	ESI1	1	Phe IS	sample0002_132441	IS	IS	MRM+	172.10/126.10	IS		71.8	0	5872197	163837	0	0	0	0	Savitzky-Golay,7,2	0.13/0.80	0.411	NBS: Internal Standard;	Peak Area	0	0	0
IS	IS	ESI1	1	Pro	sample0002_132441	IS	IS	MRM+	116.10/70.10	Qualifier	Pro IS	0	0.461	39651	1250	0	0	6730657	206841	Savitzky-Golay,7,2	0.13/0.80	0.147	NBS: ISConc=88; LC: TargetConc=235, Stdev=28; HC: TargetConc=683, Stdev=82	Peak Area	0	0	0
IS	IS	ESI1	1	Pro IS	sample0002_132441	IS	IS	MRM+	121.10/74.10	IS		88	0	6730657	206841	0	0	0	0	Savitzky-Golay,7,2	0.13/0.80	0.323	NBS: Internal Standard;	Peak Area	0	0	0
IS	IS	ESI1	1	Tyr	sample0002_132441	IS	IS	MRM+	182.10/136.10	Qualifier	Tyr IS	0	0.54	11462	477	0	0	2996586	80209	Savitzky-Golay,7,2	0.13/0.80	0.528	NBS: ISConc=113; LC: TargetConc=136, Stdev=16; HC: TargetConc=549, Stdev=66	Peak Area	0	0	0
IS	IS	ESI1	1	Tyr IS	sample0002_132441	IS	IS	MRM+	188.10/142.10	IS		113	0	2996586	80209	0	0	0	0	Savitzky-Golay,7,2	0.13/0.80	0.323	NBS: Internal Standard;	Peak Area	0	0	0
IS	IS	ESI1	1	Val	sample0002_132441	IS	IS	MRM+	118.10/72.10	Qualifier	Val IS	0	2.915	82094	2381	0	0	3406175	97381	Savitzky-Golay,7,2	0.13/0.80	0.293	NBS: ISConc=108; LC: TargetConc=213, Stdev=26; HC: TargetConc=470, Stdev=56	Peak Area	0	0	0
IS	IS	ESI1	1	Val IS	sample0002_132441	IS	IS	MRM+	124.10/77.10	IS		108	0	3406175	97381	0	0	0	0	Savitzky-Golay,7,2	0.13/0.80	0.352	NBS: Internal Standard;	Peak Area	0	0	0
IS	IS	ESI1	1	C0	sample0002_132441	IS	IS	MRM+	162.10/103.00	Qualifier	C0 IS	0	0.157	9612	366	0	0	901478	26089	Savitzky-Golay,7,2	0.13/0.80	0.352	NBS: ISConc=11.5; Initial: LimitLow=8, LimitHigh=90; Retest: LimitLow=8, LimitHigh=90; Recall: LimitLow=8, LimitHigh=90; Recall retest: LimitLow=8, LimitHigh=90; LC: TargetConc=41, Stdev=4.9; HC: TargetConc=151, Stdev=18	Peak Area	0	0	0
IS	IS	ESI1	1	C0 IS	sample0002_132441	IS	IS	MRM+	171.20/103.00	IS		11.5	0	901478	26089	0	0	0	0	Savitzky-Golay,7,2	0.13/0.80	0.381	NBS: Internal Standard;	Peak Area	0	0	0
IS	IS	ESI1	1	C2	sample0002_132441	IS	IS	MRM+	204.10/85.00	Qualifier	C2 IS	0	0.022	5458	216	0	0	1308543	36339	Savitzky-Golay,7,2	0.13/0.80	0.205	NBS: ISConc=4.78; Initial: LimitLow=0, LimitHigh=115; Retest: LimitLow=0, LimitHigh=115; Recall: LimitLow=0, LimitHigh=115; Recall retest: LimitLow=0, LimitHigh=115; LC: TargetConc=27.6, Stdev=3.3; HC: TargetConc=82.4, Stdev=9.9	Peak Area	0	0	0
IS	IS	ESI1	1	C2 IS	sample0002_132441	IS	IS	MRM+	207.10/85.00	IS		4.78	0	1308543	36339	0	0	0	0	Savitzky-Golay,7,2	0.13/0.80	0.381	NBS: Internal Standard;	Peak Area	0	0	0
IS	IS	ESI1	1	C3	sample0002_132441	IS	IS	MRM+	218.10/85.00	Qualifier	C3 IS	0	0.011	3441	153	0	0	647450	19242	Savitzky-Golay,7,2	0.13/0.80	0.675	NBS: ISConc=2.03; Initial: LimitLow=0, LimitHigh=6.8; Retest: LimitLow=0, LimitHigh=6.8; Recall: LimitLow=0, LimitHigh=6.8; Recall retest: LimitLow=0, LimitHigh=6.8; LC: TargetConc=4.63, Stdev=0.56; HC: TargetConc=13.3, Stdev=1.6	Peak Area	0	0	0
IS	IS	ESI1	1	C3 IS	sample0002_132441	IS	IS	MRM+	221.20/85.00	IS		2.03	0	647450	19242	0	0	0	0	Savitzky-Golay,7,2	0.13/0.80	0.411	NBS: Internal Standard;	Peak Area	0	0	0
IS	IS	ESI1	1	C3DC\C4OH	sample0002_132441	IS	IS	MRM+	248.10/85.00	Qualifier	C4 IS	0	0.004	1530	135	0	0	578104	15805	Savitzky-Golay,7,2	0.13/0.80	0.147	NBS: ISConc=-1; Initial: LimitLow=0, LimitHigh=10; Retest: LimitLow=0.04, LimitHigh=10; Recall: LimitLow=0.04, LimitHigh=10; Recall retest: LimitLow=0.04, LimitHigh=10	Peak Area	0	0	0
IS	IS	ESI1	1	C4	sample0002_132441	IS	IS	MRM+	232.20/85.00	Qualifier	C4 IS	0	0.129	51435	1656	0	0	578104	15805	Savitzky-Golay,7,2	0.13/0.80	0.147	NBS: ISConc=1.45; Initial: LimitLow=0, LimitHigh=1.5; Retest: LimitLow=0, LimitHigh=1.5; Recall: LimitLow=0, LimitHigh=1.5; Recall retest: LimitLow=0, LimitHigh=1.5; LC: TargetConc=0.74, Stdev=0.1; HC: TargetConc=2.74, Stdev=0.33	Peak Area	0	0	0
IS	IS	ESI1	1	C4 IS	sample0002_132441	IS	IS	MRM+	235.20/85.00	IS		1.45	0	578104	15805	0	0	0	0	Savitzky-Golay,7,2	0.13/0.80	0.381	NBS: Internal Standard;	Peak Area	0	0	0
IS	IS	ESI1	1	C4DC\C5OH	sample0002_132441	IS	IS	MRM+	262.20/85.00	Qualifier	C5 IS	0	0.011	5030	248	0	0	677715	18952	Savitzky-Golay,7,2	0.13/0.80	0.499	NBS: ISConc=-1; Initial: LimitLow=0, LimitHigh=0.5; Retest: LimitLow=0, LimitHigh=0.5; Recall: LimitLow=0, LimitHigh=0.5; Recall retest: LimitLow=0, LimitHigh=0.5	Peak Area	0	0	0
IS	IS	ESI1	1	C5	sample0002_132441	IS	IS	MRM+	246.20/85.00	Qualifier	C5 IS	0	0.003	1166	105	0	0	677715	18952	Savitzky-Golay,7,2	0.13/0.80	0.264	NBS: ISConc=1.52; Initial: LimitLow=0, LimitHigh=0.56; Retest: LimitLow=0, LimitHigh=0.56; Recall: LimitLow=0, LimitHigh=0.56; Recall retest: LimitLow=0, LimitHigh=0.56; LC: TargetConc=0.63, Stdev=0.08; HC: TargetConc=2.46, Stdev=0.3	Peak Area	0	0	0
IS	IS	ESI1	1	C5 IS	sample0002_132441	IS	IS	MRM+	255.20/85.00	IS		1.52	0	677715	18952	0	0	0	0	Savitzky-Golay,7,2	0.13/0.80	0.44	NBS: Internal Standard;	Peak Area	0	0	0
IS	IS	ESI1	1	C5:1	sample0002_132441	IS	IS	MRM+	244.20/85.00	Qualifier	C5 IS	0	0.001	319	21	0	0	677715	18952	Savitzky-Golay,7,2	0.13/0.80	0.557	NBS: ISConc=-1; Initial: LimitLow=0, LimitHigh=0.15; Retest: LimitLow=0, LimitHigh=0.15; Recall: LimitLow=0, LimitHigh=0.15; Recall retest: LimitLow=0, LimitHigh=0.15	Peak Area	0	0	0
IS	IS	ESI1	1	C5DC\C6OH	sample0002_132441	IS	IS	MRM+	276.20/85.00	Qualifier	C5DC\C6OH IS	0	0.004	945	61	0	0	389677	11090	Savitzky-Golay,7,2	0.13/0.80	0.587	NBS: ISConc=1.49; Initial: LimitLow=0, LimitHigh=0.3; Retest: LimitLow=0, LimitHigh=0.3; Recall: LimitLow=0, LimitHigh=0.3; Recall retest: LimitLow=0, LimitHigh=0.3; LC: TargetConc=0.39, Stdev=0.09; HC: TargetConc=1.98, Stdev=0.24	Peak Area	0	0	0
IS	IS	ESI1	1	C5DC\C6OH IS	sample0002_132441	IS	IS	MRM+	282.20/85.00	IS		1.49	0	389677	11090	0	0	0	0	Savitzky-Golay,7,2	0.13/0.80	0.44	NBS: Internal Standard;	Peak Area	0	0	0
IS	IS	ESI1	1	C6	sample0002_132441	IS	IS	MRM+	260.20/85.00	Qualifier	C6 IS	0	0.002	1100	84	0	0	695054	20491	Savitzky-Golay,7,2	0.13/0.80	0.147	NBS: ISConc=1.03; Initial: LimitLow=0, LimitHigh=0.2; Retest: LimitLow=0, LimitHigh=0.2; Recall: LimitLow=0, LimitHigh=0.2; Recall retest: LimitLow=0, LimitHigh=0.2; LC: TargetConc=0.29, Stdev=0.09; HC: TargetConc=1.4, Stdev=0.17	Peak Area	0	0	0
IS	IS	ESI1	1	C6 IS	sample0002_132441	IS	IS	MRM+	263.20/85.00	IS		1.03	0	695054	20491	0	0	0	0	Savitzky-Golay,7,2	0.13/0.80	0.44	NBS: Internal Standard;	Peak Area	0	0	0
IS	IS	ESI1	1	C6DC	sample0002_132441	IS	IS	MRM+	290.20/85.00	Qualifier	C5DC\C6OH IS	0	0.012	3128	180	0	0	389677	11090	Savitzky-Golay,7,2	0.13/0.80	0.499	NBS: ISConc=-1;	Peak Area	0	0	0
IS	IS	ESI1	1	C8	sample0002_132441	IS	IS	MRM+	288.20/85.00	Qualifier	C8 IS	0	0.002	838	54	0	0	561213	16404	Savitzky-Golay,7,2	0.13/0.80	0.499	NBS: ISConc=1.04; Initial: LimitLow=0, LimitHigh=0.4; Retest: LimitLow=0, LimitHigh=0.4; Recall: LimitLow=0, LimitHigh=0.4; Recall retest: LimitLow=0, LimitHigh=0.4; LC: TargetConc=0.55, Stdev=0.08; HC: TargetConc=2.76, Stdev=0.33	Peak Area	0	0	0
IS	IS	ESI1	1	C8 IS	sample0002_132441	IS	IS	MRM+	291.20/85.00	IS		1.04	0	561213	16404	0	0	0	0	Savitzky-Golay,7,2	0.13/0.80	0.469	NBS: Internal Standard;	Peak Area	0	0	0
IS	IS	ESI1	1	C8:1	sample0002_132441	IS	IS	MRM+	286.20/85.00	Qualifier	C8 IS	0	0.002	1021	79	0	0	561213	16404	Savitzky-Golay,7,2	0.13/0.80	0.733	NBS: ISConc=-1;	Peak Area	0	0	0
IS	IS	ESI1	1	C10	sample0002_132441	IS	IS	MRM+	316.20/85.00	Qualifier	C10 IS	0	0	209	21	0	0	486397	13333	Savitzky-Golay,7,2	0.13/0.80	0.44	NBS: ISConc=0.91; Initial: LimitLow=0, LimitHigh=0.29; Retest: LimitLow=0, LimitHigh=0.29; Recall: LimitLow=0, LimitHigh=0.29; Recall retest: LimitLow=0, LimitHigh=0.29; LC: TargetConc=0.31, Stdev=0.09; HC: TargetConc=2.02, Stdev=0.24	Peak Area	0	0	0
IS	IS	ESI1	1	C10 IS	sample0002_132441	IS	IS	MRM+	319.30/85.00	IS		0.91	0	486397	13333	0	0	0	0	Savitzky-Golay,7,2	0.13/0.80	0.323	NBS: Internal Standard;	Peak Area	0	0	0
IS	IS	ESI1	1	C10:1	sample0002_132441	IS	IS	MRM+	314.20/85.00	Qualifier	C10 IS	0	0.001	330	21	0	0	486397	13333	Savitzky-Golay,7,2	0.13/0.80	0.557	NBS: ISConc=-1; Initial: LimitLow=0, LimitHigh=0.3; Retest: LimitLow=0, LimitHigh=0.3; Recall: LimitLow=0, LimitHigh=0.3; Recall retest: LimitLow=0, LimitHigh=0.3	Peak Area	0	0	0
IS	IS	ESI1	1	C10:2	sample0002_132441	IS	IS	MRM+	312.20/85.00	Qualifier	C10 IS	0	0.001	396	52	0	0	486397	13333	Savitzky-Golay,7,2	0.13/0.80	0.147	NBS: ISConc=-1; Initial: LimitLow=0, LimitHigh=100; Retest: LimitLow=0, LimitHigh=100; Recall: LimitLow=0, LimitHigh=100; Recall retest: LimitLow=0, LimitHigh=100	Peak Area	0	0	0
IS	IS	ESI1	1	C12	sample0002_132441	IS	IS	MRM+	344.30/85.00	Qualifier	C12 IS	0	0.001	384	21	0	0	550099	16803	Savitzky-Golay,7,2	0.13/0.80	0.176	NBS: ISConc=1; Initial: LimitLow=0, LimitHigh=0.33; Retest: LimitLow=0, LimitHigh=0.33; Recall: LimitLow=0, LimitHigh=0.33; Recall retest: LimitLow=0, LimitHigh=0.33; LC: TargetConc=0.28, Stdev=0.09; HC: TargetConc=1.36, Stdev=0.16	Peak Area	0	0	0
IS	IS	ESI1	1	C12 IS	sample0002_132441	IS	IS	MRM+	347.30/85.00	IS		1	0	550099	16803	0	0	0	0	Savitzky-Golay,7,2	0.13/0.80	0.323	NBS: Internal Standard;	Peak Area	0	0	0
IS	IS	ESI1	1	C12:1	sample0002_132441	IS	IS	MRM+	342.30/85.00	Qualifier	C12 IS	0	0.001	511	41	0	0	550099	16803	Savitzky-Golay,7,2	0.13/0.80	0.469	NBS: ISConc=-1; Initial: LimitLow=0, LimitHigh=1000; Retest: LimitLow=0, LimitHigh=1000; Recall: LimitLow=0, LimitHigh=1000; Recall retest: LimitLow=0, LimitHigh=10000	Peak Area	0	0	0
IS	IS	ESI1	1	C14	sample0002_132441	IS	IS	MRM+	372.30/85.00	Qualifier	C14 IS	0	0.001	366	51	0	0	542132	16366	Savitzky-Golay,7,2	0.13/0.80	0.264	NBS: ISConc=1.02; Initial: LimitLow=0, LimitHigh=0.59; Retest: LimitLow=0, LimitHigh=0.59; Recall: LimitLow=0, LimitHigh=0.59; Recall retest: LimitLow=0, LimitHigh=0.59; LC: TargetConc=0.33, Stdev=0.09; HC: TargetConc=1.9, Stdev=0.23	Peak Area	0	0	0
IS	IS	ESI1	1	C14 IS	sample0002_132441	IS	IS	MRM+	375.30/85.00	IS		1.02	0	542132	16366	0	0	0	0	Savitzky-Golay,7,2	0.13/0.80	0.411	NBS: Internal Standard;	Peak Area	0	0	0
IS	IS	ESI1	1	C14:1	sample0002_132441	IS	IS	MRM+	370.30/85.00	Qualifier	C14 IS	0	0.001	398	44	0	0	542132	16366	Savitzky-Golay,7,2	0.13/0.80	0.469	NBS: ISConc=-1; Initial: LimitLow=0, LimitHigh=0.32; Retest: LimitLow=0, LimitHigh=0.32; Recall: LimitLow=0, LimitHigh=0.32; Recall retest: LimitLow=0, LimitHigh=0.32	Peak Area	0	0	0
IS	IS	ESI1	1	C14:2	sample0002_132441	IS	IS	MRM+	368.30/85.00	Qualifier	C14 IS	0	0	106	21	0	0	542132	16366	Savitzky-Golay,7,2	0.13/0.80	0.763	NBS: ISConc=-1;	Peak Area	0	0	0
IS	IS	ESI1	1	C14OH	sample0002_132441	IS	IS	MRM+	388.30/85.00	Qualifier	C14 IS	0	0	0	0	0	0	542132	16366	Savitzky-Golay,7,2	0.13/0.80	0.763	NBS: ISConc=-1; Initial: LimitLow=0, LimitHigh=0.2; Retest: LimitLow=0, LimitHigh=0.2; Recall: LimitLow=0, LimitHigh=0.2; Recall retest: LimitLow=0, LimitHigh=0.2	Peak Area	0	0	0
IS	IS	ESI1	1	C16	sample0002_132441	IS	IS	MRM+	400.30/85.00	Qualifier	C16 IS	0	0.001	334	49	0	0	414728	13364	Savitzky-Golay,7,2	0.13/0.80	0.763	NBS: ISConc=0.89; Initial: LimitLow=0.3, LimitHigh=8.5; Retest: LimitLow=0.3, LimitHigh=8.5; Recall: LimitLow=0.3, LimitHigh=8.5; Recall retest: LimitLow=0.3, LimitHigh=8.5; LC: TargetConc=2.02, Stdev=0.24; HC: TargetConc=11.7, Stdev=1.4	Peak Area	0	0	0
IS	IS	ESI1	1	C16 IS	sample0002_132441	IS	IS	MRM+	403.40/85.00	IS		0.89	0	414728	13364	0	0	0	0	Savitzky-Golay,7,2	0.13/0.80	0.293	NBS: Internal Standard;	Peak Area	0	0	0
IS	IS	ESI1	1	C16:1	sample0002_132441	IS	IS	MRM+	398.30/85.00	Qualifier	C16 IS	0	0.001	405	40	0	0	414728	13364	Savitzky-Golay,7,2	0.13/0.80	0.704	NBS: ISConc=-1;	Peak Area	0	0	0
IS	IS	ESI1	1	C16OH	sample0002_132441	IS	IS	MRM+	416.30/85.00	Qualifier	C16 IS	0	0.001	361	44	0	0	414728	13364	Savitzky-Golay,7,2	0.13/0.80	0.675	NBS: ISConc=-1; Initial: LimitLow=0, LimitHigh=0.19; Retest: LimitLow=0, LimitHigh=0.19; Recall: LimitLow=0, LimitHigh=0.19; Recall retest: LimitLow=0, LimitHigh=0.19	Peak Area	0	0	0
IS	IS	ESI1	1	C16:1OH\C17	sample0002_132441	IS	IS	MRM+	414.30/85.00	Qualifier	C16 IS	0	0	142	21	0	0	414728	13364	Savitzky-Golay,7,2	0.13/0.80	0.675	NBS: ISConc=-1; Initial: LimitLow=0, LimitHigh=0.22; Retest: LimitLow=0, LimitHigh=0.22; Recall: LimitLow=0, LimitHigh=0.22; Recall retest: LimitLow=0, LimitHigh=0.22	Peak Area	0	0	0
IS	IS	ESI1	1	C18	sample0002_132441	IS	IS	MRM+	428.40/85.00	Qualifier	C18 IS	0	0.001	400	21	0	0	362645	14143	Savitzky-Golay,7,2	0.13/0.80	0.645	NBS: ISConc=0.92; Initial: LimitLow=0.13, LimitHigh=2.5; Retest: LimitLow=0.13, LimitHigh=2.5; Recall: LimitLow=0.13, LimitHigh=2.5; Recall retest: LimitLow=0.13, LimitHigh=2.5; LC: TargetConc=1.14, Stdev=0.14; HC: TargetConc=4.32, Stdev=0.52	Peak Area	0	0	0
IS	IS	ESI1	1	C18 IS	sample0002_132441	IS	IS	MRM+	431.40/85.00	IS		0.92	0	362645	14143	0	0	0	0	Savitzky-Golay,7,2	0.13/0.80	0.147	NBS: Internal Standard;	Peak Area	0	0	0
IS	IS	ESI1	1	C18:1	sample0002_132441	IS	IS	MRM+	426.40/85.00	Qualifier	C18 IS	0	0.002	726	44	0	0	362645	14143	Savitzky-Golay,7,2	0.13/0.80	0.704	NBS: ISConc=-1; Initial: LimitLow=0.15, LimitHigh=3.35; Retest: LimitLow=0.15, LimitHigh=3.35; Recall: LimitLow=0.15, LimitHigh=3.35; Recall retest: LimitLow=0.15, LimitHigh=3.35	Peak Area	0	0	0
IS	IS	ESI1	1	C18:2	sample0002_132441	IS	IS	MRM+	424.30/85.00	Qualifier	C18 IS	0	0.002	814	76	0	0	362645	14143	Savitzky-Golay,7,2	0.13/0.80	0.499	NBS: ISConc=-1;	Peak Area	0	0	0
IS	IS	ESI1	1	C18OH	sample0002_132441	IS	IS	MRM+	444.40/85.00	Qualifier	C18 IS	0	0	130	21	0	0	362645	14143	Savitzky-Golay,7,2	0.13/0.80	0.733	NBS: ISConc=-1; Initial: LimitLow=0, LimitHigh=0.14; Retest: LimitLow=0, LimitHigh=0.14; Recall: LimitLow=0, LimitHigh=0.14; Recall retest: LimitLow=0, LimitHigh=0.14	Peak Area	0	0	0
IS	IS	ESI1	1	C18:1OH	sample0002_132441	IS	IS	MRM+	442.40/85.00	Qualifier	C18 IS	0	0	0	0	0	0	362645	14143	Savitzky-Golay,7,2	0.13/0.80	0.763	NBS: ISConc=-1; Initial: LimitLow=0, LimitHigh=0.16; Retest: LimitLow=0, LimitHigh=0.16; Recall: LimitLow=0, LimitHigh=0.16; Recall retest: LimitLow=0, LimitHigh=0.16	Peak Area	0	0	0
IS	IS	ESI1	1	C18:2OH	sample0002_132441	IS	IS	MRM+	440.30/85.00	Qualifier	C18 IS	0	0	142	21	0	0	362645	14143	Savitzky-Golay,7,2	0.13/0.80	0.264	NBS: ISConc=-1;	Peak Area	0	0	0
IS	IS	ESI1	1	C20	sample0002_132441	IS	IS	MRM+	456.40/85.00	Qualifier	C26 IS	0	0.004	283	42	0	0	75505	4515	Savitzky-Golay,7,2	0.13/0.80	0.499	NBS: ISConc=-1;	Peak Area	0	0	0
IS	IS	ESI1	1	C22	sample0002_132441	IS	IS	MRM+	484.40/85.00	Qualifier	C26 IS	0	0.005	354	21	0	0	75505	4515	Savitzky-Golay,7,2	0.13/0.80	0.616	NBS: ISConc=-1;	Peak Area	0	0	0
IS	IS	ESI1	1	C24	sample0002_132441	IS	IS	MRM+	512.50/85.00	Qualifier	C26 IS	0	0	0	0	0	0	75505	4515	Savitzky-Golay,7,2	0.13/0.80	0.763	NBS: ISConc=-1;	Peak Area	0	0	0
IS	IS	ESI1	1	C26	sample0002_132441	IS	IS	MRM+	540.50/85.00	Qualifier	C26 IS	0	0.001	37	12	0	0	75505	4515	Savitzky-Golay,7,2	0.13/0.80	0.147	NBS: ISConc=1.09; LC: TargetConc=0.61, Stdev=0.09; HC: TargetConc=1.66, Stdev=0.2	Peak Area	0	0	0
IS	IS	ESI1	1	C26 IS	sample0002_132441	IS	IS	MRM+	543.50/85.00	IS		1.09	0	75505	4515	0	0	0	0	Savitzky-Golay,7,2	0.13/0.80	0.147	NBS: Internal Standard;	Peak Area	0	0	0
IS	IS	ESI1	1	SA	sample0002_132441	IS	IS	MRM+	155.10/109.10	Qualifier	SA IS	0	0.216	18094	677	0	0	4859433	138411	Savitzky-Golay,7,2	0.13/0.80	0.352	NBS: ISConc=58.1; Initial: LimitLow=0, LimitHigh=2; Retest: LimitLow=0, LimitHigh=2; Recall: LimitLow=0, LimitHigh=2; Recall retest: LimitLow=0, LimitHigh=2; LC: TargetConc=2.57, Stdev=0.38; HC: TargetConc=10.4, Stdev=1.2	Peak Area	0	0	0
IS	IS	ESI1	1	SA IS	sample0002_132441	IS	IS	MRM+	160.10/114.10	IS		58.1	0	4859433	138411	0	0	0	0	Savitzky-Golay,7,2	0.13/0.80	0.411	NBS: Internal Standard;	Peak Area	0	0	0
IS	IS	ESI1	1	ADO	sample0002_132441	IS	IS	MRM+	268.10/136.10	Qualifier	ADO IS	0	0.001	786	67	0	0	3756069	103542	Savitzky-Golay,7,2	0.13/0.80	0.616	NBS: ISConc=9.44; LC: TargetConc=2.51, Stdev=0.34; HC: TargetConc=6.91, Stdev=0.83	Peak Area	0	0	0
IS	IS	ESI1	1	ADO IS	sample0002_132441	IS	IS	MRM+	273.10/136.10	IS		9.44	0	3756069	103542	0	0	0	0	Savitzky-Golay,7,2	0.13/0.80	0.44	NBS: Internal Standard;	Peak Area	0	0	0
IS	IS	ESI1	1	D-ADO	sample0002_132441	IS	IS	MRM+	252.10/136.10	Qualifier	D-ADO IS	0	0	70	18	0	0	2888532	82909	Savitzky-Golay,7,2	0.13/0.80	0.147	NBS: ISConc=9.82;	Peak Area	0	0	0
IS	IS	ESI1	1	D-ADO IS	sample0002_132441	IS	IS	MRM+	257.10/136.10	IS		9.82	0	2888532	82909	0	0	0	0	Savitzky-Golay,7,2	0.13/0.80	0.147	NBS: Internal Standard;	Peak Area	0	0	0
IS	IS	ESI1	1	C20:0-LPC	sample0002_132441	IS	IS	MRM+	552.40/104.10	Qualifier	C26:0-LPC IS	0	0	0	0	0	0	50130	2940	Savitzky-Golay,7,2	0.13/0.80	0.763	NBS: ISConc=-1;	Peak Area	0	0	0
IS	IS	ESI1	1	C22:0-LPC	sample0002_132441	IS	IS	MRM+	580.40/104.10	Qualifier	C26:0-LPC IS	0	0	0	0	0	0	50130	2940	Savitzky-Golay,7,2	0.13/0.80	0.763	NBS: ISConc=-1;	Peak Area	0	0	0
IS	IS	ESI1	1	C24:0-LPC	sample0002_132441	IS	IS	MRM+	608.50/104.10	Qualifier	C26:0-LPC IS	0	0	0	0	0	0	50130	2940	Savitzky-Golay,7,2	0.13/0.80	0.763	NBS: ISConc=-1;	Peak Area	0	0	0
IS	IS	ESI1	1	C26:0-LPC	sample0002_132441	IS	IS	MRM+	636.50/104.10	Qualifier	C26:0-LPC IS	0	0	0	0	0	0	50130	2940	Savitzky-Golay,7,2	0.13/0.80	0.763	NBS: ISConc=4.4; LC: TargetConc=0.92, Stdev=0.11; HC: TargetConc=3.04, Stdev=0.36	Peak Area	0	0	0
IS	IS	ESI1	1	C26:0-LPC IS	sample0002_132441	IS	IS	MRM+	640.50/104.10	IS		4.4	0	50130	2940	0	0	0	0	Savitzky-Golay,7,2	0.13/0.80	0.205	NBS: Internal Standard;	Peak Area	0	0	0
IS	IS	ESI1	1	ASA	sample0002_132441	IS	IS	MRM+	291.10/70.10	Qualifier	Arg IS	0	0.01	1473	75	0	0	7108313	222295	Savitzky-Golay,7,2	0.13/0.80	0.469	NBS: --	Peak Area	0	0	0
IS	IS	ESI1	1	ASA anhydride I + II	sample0002_132441	IS	IS	MRM+	273.10/70.10	Qualifier	Arg IS	0	0.003	389	59	0	0	7108313	222295	Savitzky-Golay,7,2	0.13/0.80	0.293	NBS: --	Peak Area	0	0	0
IS	IS			ASATotal	sample0002_132441	IS	IS	N/A	0.00/0.00	Qualifier	Arg IS	0	0.013	1862	134	0	0	7108313	222295	Savitzky-Golay,7,2	0.13/0.80	0	NBS: ISConc=-1; Initial: LimitLow=0, LimitHigh=1.5; Retest: LimitLow=0, LimitHigh=1.5; Recall: LimitLow=0, LimitHigh=1.5; Recall retest: LimitLow=0, LimitHigh=1.5; LC: TargetConc=2.22, Stdev=0.38; HC: TargetConc=39, Stdev=4.7	Peak Area	0	0	0
LC	LC	ESI1	1	Ala	sample0003_132625	LC745464	LC	MRM+	90.10/44.00	Qualifier	Ala IS	0	510.68	967501	27277	0	0	259267	7930	Savitzky-Golay,7,2	0.13/0.80	0.44	NBS: ISConc=115; Initial: LimitLow=0, LimitHigh=10000; Retest: LimitLow=0, LimitHigh=10000; Recall: LimitLow=0, LimitHigh=10000; Recall retest: LimitLow=0, LimitHigh=10000; LC: TargetConc=479, Stdev=57; HC: TargetConc=967, Stdev=116	Peak Area	479	308	650
LC	LC	ESI1	1	Ala IS	sample0003_132625	LC745464	LC	MRM+	93.10/47.10	IS		115	0	259267	7930	0	0	0	0	Savitzky-Golay,7,2	0.13/0.80	0.469	NBS: Internal Standard;	Peak Area	0	0	0
LC	LC	ESI1	1	Arg	sample0003_132625	LC745464	LC	MRM+	175.10/70.10	Qualifier	Arg IS	0	25.942	784903	20477	0	0	1448477	38392	Savitzky-Golay,7,2	0.13/0.80	0.44	NBS: ISConc=47.4; Initial: LimitLow=0, LimitHigh=70; Retest: LimitLow=0, LimitHigh=70; Recall: LimitLow=0, LimitHigh=70; Recall retest: LimitLow=0, LimitHigh=70; LC: TargetConc=24.2, Stdev=2.9; HC: TargetConc=136, Stdev=16	Peak Area	24.2	15.5	32.9
LC	LC	ESI1	1	Arg IS	sample0003_132625	LC745464	LC	MRM+	180.10/75.10	IS		47.4	0	1448477	38392	0	0	0	0	Savitzky-Golay,7,2	0.13/0.80	0.293	NBS: Internal Standard;	Peak Area	0	0	0
LC	LC	ESI1	1	Cit	sample0003_132625	LC745464	LC	MRM+	176.10/113.10	Qualifier	Cit IS	0	44.093	145405	4021	0	0	304816	8097	Savitzky-Golay,7,2	0.13/0.80	0.469	NBS: ISConc=81.8; Initial: LimitLow=0, LimitHigh=80; Retest: LimitLow=0, LimitHigh=80; Recall: LimitLow=0, LimitHigh=80; Recall retest: LimitLow=0, LimitHigh=80; LC: TargetConc=33.1, Stdev=4; HC: TargetConc=147, Stdev=18	Peak Area	33.1	21.1	45.1
LC	LC	ESI1	1	Cit IS	sample0003_132625	LC745464	LC	MRM+	178.10/115.10	IS		81.8	0	304816	8097	0	0	0	0	Savitzky-Golay,7,2	0.13/0.80	0.205	NBS: Internal Standard;	Peak Area	0	0	0
LC	LC	ESI1	1	Gln\Lys	sample0003_132625	LC745464	LC	MRM+	147.10/84.00	Qualifier	Gln\Lys IS	0	780.252	4708776	121894	0	0	539343	14832	Savitzky-Golay,7,2	0.13/0.80	0.587	NBS: ISConc=99.3; LC: TargetConc=635, Stdev=76; HC: TargetConc=1350, Stdev=160	Peak Area	635	407	863
LC	LC	ESI1	1	Gln\Lys IS	sample0003_132625	LC745464	LC	MRM+	152.10/88.10	IS		99.3	0	539343	14832	0	0	0	0	Savitzky-Golay,7,2	0.13/0.80	0.176	NBS: Internal Standard;	Peak Area	0	0	0
LC	LC	ESI1	1	Glu	sample0003_132625	LC745464	LC	MRM+	148.10/84.00	Qualifier	Gln\Lys IS	0	104.817	569309	15746	0	0	539343	14832	Savitzky-Golay,7,2	0.13/0.80	0.557	NBS: ISConc=-1;	Peak Area	0	0	0
LC	LC	ESI1	1	Gly	sample0003_132625	LC745464	LC	MRM+	76.00/30.00	Qualifier	Gly IS	0	711.295	384089	11241	0	0	322501	8828	Savitzky-Golay,7,2	0.13/0.80	0.557	NBS: ISConc=553; LC: TargetConc=549, Stdev=66; HC: TargetConc=1320, Stdev=160	Peak Area	549	351	747
LC	LC	ESI1	1	Gly IS	sample0003_132625	LC745464	LC	MRM+	78.00/32.00	IS		553	0	322501	8828	0	0	0	0	Savitzky-Golay,7,2	0.13/0.80	0.235	NBS: Internal Standard;	Peak Area	0	0	0
LC	LC	ESI1	1	Leu\Ile\Pro-OH	sample0003_132625	LC745464	LC	MRM+	132.10/86.10	Qualifier	Leu\Ile\Pro-OH IS	0	229.179	4645615	125113	0	0	2067813	56580	Savitzky-Golay,7,2	0.13/0.80	0.411	NBS: ISConc=101; Initial: LimitLow=0, LimitHigh=380; Retest: LimitLow=0, LimitHigh=380; Recall: LimitLow=0, LimitHigh=380; Recall retest: LimitLow=0, LimitHigh=380; LC: TargetConc=183, Stdev=22; HC: TargetConc=772, Stdev=93	Peak Area	183	117	249
LC	LC	ESI1	1	Leu\Ile\Pro-OH IS	sample0003_132625	LC745464	LC	MRM+	135.10/89.10	IS		101	0	2067813	56580	0	0	0	0	Savitzky-Golay,7,2	0.13/0.80	0.44	NBS: Internal Standard;	Peak Area	0	0	0
LC	LC	ESI1	1	Met	sample0003_132625	LC745464	LC	MRM+	150.10/104.10	Qualifier	Met IS	0	45.429	240491	6688	0	0	612238	16813	Savitzky-Golay,7,2	0.13/0.80	0.528	NBS: ISConc=99.7; Initial: LimitLow=7, LimitHigh=80; Retest: LimitLow=7, LimitHigh=80; Recall: LimitLow=7, LimitHigh=80; Recall retest: LimitLow=7, LimitHigh=80; LC: TargetConc=36, Stdev=4.3; HC: TargetConc=177, Stdev=21	Peak Area	36	23.1	48.9
LC	LC	ESI1	1	Met IS	sample0003_132625	LC745464	LC	MRM+	153.10/107.10	IS		99.7	0	612238	16813	0	0	0	0	Savitzky-Golay,7,2	0.13/0.80	0.44	NBS: Internal Standard;	Peak Area	0	0	0
LC	LC	ESI1	1	Orn	sample0003_132625	LC745464	LC	MRM+	133.10/70.10	Qualifier	Orn IS	0	195.172	1540621	41026	0	0	860407	23921	Savitzky-Golay,7,2	0.13/0.80	0.293	NBS: ISConc=109; LC: TargetConc=154, Stdev=18; HC: TargetConc=488, Stdev=59	Peak Area	154	100	208
LC	LC	ESI1	1	Orn IS	sample0003_132625	LC745464	LC	MRM+	139.10/76.10	IS		109	0	860407	23921	0	0	0	0	Savitzky-Golay,7,2	0.13/0.80	0.645	NBS: Internal Standard;	Peak Area	0	0	0
LC	LC	ESI1	1	Phe	sample0003_132625	LC745464	LC	MRM+	166.10/120.10	Qualifier	Phe IS	0	93.825	3041748	81272	0	0	2513936	69213	Savitzky-Golay,7,2	0.13/0.80	0.499	NBS: ISConc=71.8; Initial: LimitLow=0, LimitHigh=120; Retest: LimitLow=0, LimitHigh=120; Recall: LimitLow=0, LimitHigh=120; Recall retest: LimitLow=0, LimitHigh=120; LC: TargetConc=79.4, Stdev=9.5; HC: TargetConc=264, Stdev=32	Peak Area	79.4	50.9	107.9
LC	LC	ESI1	1	Phe IS	sample0003_132625	LC745464	LC	MRM+	172.10/126.10	IS		71.8	0	2513936	69213	0	0	0	0	Savitzky-Golay,7,2	0.13/0.80	0.587	NBS: Internal Standard;	Peak Area	0	0	0
LC	LC	ESI1	1	Pro	sample0003_132625	LC745464	LC	MRM+	116.10/70.10	Qualifier	Pro IS	0	264.399	4988000	141375	0	0	1477543	41037	Savitzky-Golay,7,2	0.13/0.80	0.469	NBS: ISConc=88; LC: TargetConc=235, Stdev=28; HC: TargetConc=683, Stdev=82	Peak Area	235	151	319
LC	LC	ESI1	1	Pro IS	sample0003_132625	LC745464	LC	MRM+	121.10/74.10	IS		88	0	1477543	41037	0	0	0	0	Savitzky-Golay,7,2	0.13/0.80	0.469	NBS: Internal Standard;	Peak Area	0	0	0
LC	LC	ESI1	1	Tyr	sample0003_132625	LC745464	LC	MRM+	182.10/136.10	Qualifier	Tyr IS	0	164.611	1152141	32282	0	0	988636	27438	Savitzky-Golay,7,2	0.13/0.80	0.704	NBS: ISConc=113; LC: TargetConc=136, Stdev=16; HC: TargetConc=549, Stdev=66	Peak Area	136	88	184
LC	LC	ESI1	1	Tyr IS	sample0003_132625	LC745464	LC	MRM+	188.10/142.10	IS		113	0	988636	27438	0	0	0	0	Savitzky-Golay,7,2	0.13/0.80	0.411	NBS: Internal Standard;	Peak Area	0	0	0
LC	LC	ESI1	1	Val	sample0003_132625	LC745464	LC	MRM+	118.10/72.10	Qualifier	Val IS	0	278.689	3441393	97882	0	0	1493673	40879	Savitzky-Golay,7,2	0.13/0.80	0.469	NBS: ISConc=108; LC: TargetConc=213, Stdev=26; HC: TargetConc=470, Stdev=56	Peak Area	213	135	291
LC	LC	ESI1	1	Val IS	sample0003_132625	LC745464	LC	MRM+	124.10/77.10	IS		108	0	1493673	40879	0	0	0	0	Savitzky-Golay,7,2	0.13/0.80	0.44	NBS: Internal Standard;	Peak Area	0	0	0
LC	LC	ESI1	1	C0	sample0003_132625	LC745464	LC	MRM+	162.10/103.00	Qualifier	C0 IS	0	53.409	1609840	42734	0	0	443689	12249	Savitzky-Golay,7,2	0.13/0.80	0.411	NBS: ISConc=11.5; Initial: LimitLow=8, LimitHigh=90; Retest: LimitLow=8, LimitHigh=90; Recall: LimitLow=8, LimitHigh=90; Recall retest: LimitLow=8, LimitHigh=90; LC: TargetConc=41, Stdev=4.9; HC: TargetConc=151, Stdev=18	Peak Area	41	26.3	55.7
LC	LC	ESI1	1	C0 IS	sample0003_132625	LC745464	LC	MRM+	171.20/103.00	IS		11.5	0	443689	12249	0	0	0	0	Savitzky-Golay,7,2	0.13/0.80	0.587	NBS: Internal Standard;	Peak Area	0	0	0
LC	LC	ESI1	1	C2	sample0003_132625	LC745464	LC	MRM+	204.10/85.00	Qualifier	C2 IS	0	37.429	5159653	138533	0	0	724824	19822	Savitzky-Golay,7,2	0.13/0.80	0.469	NBS: ISConc=4.78; Initial: LimitLow=0, LimitHigh=115; Retest: LimitLow=0, LimitHigh=115; Recall: LimitLow=0, LimitHigh=115; Recall retest: LimitLow=0, LimitHigh=115; LC: TargetConc=27.6, Stdev=3.3; HC: TargetConc=82.4, Stdev=9.9	Peak Area	27.6	17.7	37.5
LC	LC	ESI1	1	C2 IS	sample0003_132625	LC745464	LC	MRM+	207.10/85.00	IS		4.78	0	724824	19822	0	0	0	0	Savitzky-Golay,7,2	0.13/0.80	0.381	NBS: Internal Standard;	Peak Area	0	0	0
LC	LC	ESI1	1	C3	sample0003_132625	LC745464	LC	MRM+	218.10/85.00	Qualifier	C3 IS	0	5.143	844846	23537	0	0	333502	9344	Savitzky-Golay,7,2	0.13/0.80	0.381	NBS: ISConc=2.03; Initial: LimitLow=0, LimitHigh=6.8; Retest: LimitLow=0, LimitHigh=6.8; Recall: LimitLow=0, LimitHigh=6.8; Recall retest: LimitLow=0, LimitHigh=6.8; LC: TargetConc=4.63, Stdev=0.56; HC: TargetConc=13.3, Stdev=1.6	Peak Area	4.63	2.95	6.31
LC	LC	ESI1	1	C3 IS	sample0003_132625	LC745464	LC	MRM+	221.20/85.00	IS		2.03	0	333502	9344	0	0	0	0	Savitzky-Golay,7,2	0.13/0.80	0.411	NBS: Internal Standard;	Peak Area	0	0	0
LC	LC	ESI1	1	C3DC\C4OH	sample0003_132625	LC745464	LC	MRM+	248.10/85.00	Qualifier	C4 IS	0	0.091	18213	641	0	0	291421	7852	Savitzky-Golay,7,2	0.13/0.80	0.411	NBS: ISConc=-1; Initial: LimitLow=0, LimitHigh=10; Retest: LimitLow=0.04, LimitHigh=10; Recall: LimitLow=0.04, LimitHigh=10; Recall retest: LimitLow=0.04, LimitHigh=10	Peak Area	0	0	0
LC	LC	ESI1	1	C4	sample0003_132625	LC745464	LC	MRM+	232.20/85.00	Qualifier	C4 IS	0	0.854	171704	4811	0	0	291421	7852	Savitzky-Golay,7,2	0.13/0.80	0.499	NBS: ISConc=1.45; Initial: LimitLow=0, LimitHigh=1.5; Retest: LimitLow=0, LimitHigh=1.5; Recall: LimitLow=0, LimitHigh=1.5; Recall retest: LimitLow=0, LimitHigh=1.5; LC: TargetConc=0.74, Stdev=0.1; HC: TargetConc=2.74, Stdev=0.33	Peak Area	0.74	0.44	1.04
LC	LC	ESI1	1	C4 IS	sample0003_132625	LC745464	LC	MRM+	235.20/85.00	IS		1.45	0	291421	7852	0	0	0	0	Savitzky-Golay,7,2	0.13/0.80	0.44	NBS: Internal Standard;	Peak Area	0	0	0
LC	LC	ESI1	1	C4DC\C5OH	sample0003_132625	LC745464	LC	MRM+	262.20/85.00	Qualifier	C5 IS	0	0.503	114778	3543	0	0	346666	9702	Savitzky-Golay,7,2	0.13/0.80	0.44	NBS: ISConc=-1; Initial: LimitLow=0, LimitHigh=0.5; Retest: LimitLow=0, LimitHigh=0.5; Recall: LimitLow=0, LimitHigh=0.5; Recall retest: LimitLow=0, LimitHigh=0.5	Peak Area	0	0	0
LC	LC	ESI1	1	C5	sample0003_132625	LC745464	LC	MRM+	246.20/85.00	Qualifier	C5 IS	0	0.72	171019	4921	0	0	346666	9702	Savitzky-Golay,7,2	0.13/0.80	0.557	NBS: ISConc=1.52; Initial: LimitLow=0, LimitHigh=0.56; Retest: LimitLow=0, LimitHigh=0.56; Recall: LimitLow=0, LimitHigh=0.56; Recall retest: LimitLow=0, LimitHigh=0.56; LC: TargetConc=0.63, Stdev=0.08; HC: TargetConc=2.46, Stdev=0.3	Peak Area	0.63	0.39	0.87
LC	LC	ESI1	1	C5 IS	sample0003_132625	LC745464	LC	MRM+	255.20/85.00	IS		1.52	0	346666	9702	0	0	0	0	Savitzky-Golay,7,2	0.13/0.80	0.411	NBS: Internal Standard;	Peak Area	0	0	0
LC	LC	ESI1	1	C5:1	sample0003_132625	LC745464	LC	MRM+	244.20/85.00	Qualifier	C5 IS	0	0.019	4266	170	0	0	346666	9702	Savitzky-Golay,7,2	0.13/0.80	0.235	NBS: ISConc=-1; Initial: LimitLow=0, LimitHigh=0.15; Retest: LimitLow=0, LimitHigh=0.15; Recall: LimitLow=0, LimitHigh=0.15; Recall retest: LimitLow=0, LimitHigh=0.15	Peak Area	0	0	0
LC	LC	ESI1	1	C5DC\C6OH	sample0003_132625	LC745464	LC	MRM+	276.20/85.00	Qualifier	C5DC\C6OH IS	0	0.543	46891	1354	0	0	128683	4365	Savitzky-Golay,7,2	0.13/0.80	0.528	NBS: ISConc=1.49; Initial: LimitLow=0, LimitHigh=0.3; Retest: LimitLow=0, LimitHigh=0.3; Recall: LimitLow=0, LimitHigh=0.3; Recall retest: LimitLow=0, LimitHigh=0.3; LC: TargetConc=0.39, Stdev=0.09; HC: TargetConc=1.98, Stdev=0.24	Peak Area	0.39	0.12	0.66
LC	LC	ESI1	1	C5DC\C6OH IS	sample0003_132625	LC745464	LC	MRM+	282.20/85.00	IS		1.49	0	128683	4365	0	0	0	0	Savitzky-Golay,7,2	0.13/0.80	0.147	NBS: Internal Standard;	Peak Area	0	0	0
LC	LC	ESI1	1	C6	sample0003_132625	LC745464	LC	MRM+	260.20/85.00	Qualifier	C6 IS	0	0.34	75094	2079	0	0	252541	7353	Savitzky-Golay,7,2	0.13/0.80	0.264	NBS: ISConc=1.03; Initial: LimitLow=0, LimitHigh=0.2; Retest: LimitLow=0, LimitHigh=0.2; Recall: LimitLow=0, LimitHigh=0.2; Recall retest: LimitLow=0, LimitHigh=0.2; LC: TargetConc=0.29, Stdev=0.09; HC: TargetConc=1.4, Stdev=0.17	Peak Area	0.29	0.02	0.56
LC	LC	ESI1	1	C6 IS	sample0003_132625	LC745464	LC	MRM+	263.20/85.00	IS		1.03	0	252541	7353	0	0	0	0	Savitzky-Golay,7,2	0.13/0.80	0.411	NBS: Internal Standard;	Peak Area	0	0	0
LC	LC	ESI1	1	C6DC	sample0003_132625	LC745464	LC	MRM+	290.20/85.00	Qualifier	C5DC\C6OH IS	0	0.064	5558	303	0	0	128683	4365	Savitzky-Golay,7,2	0.13/0.80	0.205	NBS: ISConc=-1;	Peak Area	0	0	0
LC	LC	ESI1	1	C8	sample0003_132625	LC745464	LC	MRM+	288.20/85.00	Qualifier	C8 IS	0	0.618	142915	3930	0	0	242919	6673	Savitzky-Golay,7,2	0.13/0.80	0.293	NBS: ISConc=1.04; Initial: LimitLow=0, LimitHigh=0.4; Retest: LimitLow=0, LimitHigh=0.4; Recall: LimitLow=0, LimitHigh=0.4; Recall retest: LimitLow=0, LimitHigh=0.4; LC: TargetConc=0.55, Stdev=0.08; HC: TargetConc=2.76, Stdev=0.33	Peak Area	0.55	0.31	0.79
LC	LC	ESI1	1	C8 IS	sample0003_132625	LC745464	LC	MRM+	291.20/85.00	IS		1.04	0	242919	6673	0	0	0	0	Savitzky-Golay,7,2	0.13/0.80	0.411	NBS: Internal Standard;	Peak Area	0	0	0
LC	LC	ESI1	1	C8:1	sample0003_132625	LC745464	LC	MRM+	286.20/85.00	Qualifier	C8 IS	0	0.069	16070	494	0	0	242919	6673	Savitzky-Golay,7,2	0.13/0.80	0.176	NBS: ISConc=-1;	Peak Area	0	0	0
LC	LC	ESI1	1	C10	sample0003_132625	LC745464	LC	MRM+	316.20/85.00	Qualifier	C10 IS	0	0.423	82928	2525	0	0	213878	6417	Savitzky-Golay,7,2	0.13/0.80	0.176	NBS: ISConc=0.91; Initial: LimitLow=0, LimitHigh=0.29; Retest: LimitLow=0, LimitHigh=0.29; Recall: LimitLow=0, LimitHigh=0.29; Recall retest: LimitLow=0, LimitHigh=0.29; LC: TargetConc=0.31, Stdev=0.09; HC: TargetConc=2.02, Stdev=0.24	Peak Area	0.31	0.04	0.58
LC	LC	ESI1	1	C10 IS	sample0003_132625	LC745464	LC	MRM+	319.30/85.00	IS		0.91	0	213878	6417	0	0	0	0	Savitzky-Golay,7,2	0.13/0.80	0.323	NBS: Internal Standard;	Peak Area	0	0	0
LC	LC	ESI1	1	C10:1	sample0003_132625	LC745464	LC	MRM+	314.20/85.00	Qualifier	C10 IS	0	0.026	6112	327	0	0	213878	6417	Savitzky-Golay,7,2	0.13/0.80	0.147	NBS: ISConc=-1; Initial: LimitLow=0, LimitHigh=0.3; Retest: LimitLow=0, LimitHigh=0.3; Recall: LimitLow=0, LimitHigh=0.3; Recall retest: LimitLow=0, LimitHigh=0.3	Peak Area	0	0	0
LC	LC	ESI1	1	C10:2	sample0003_132625	LC745464	LC	MRM+	312.20/85.00	Qualifier	C10 IS	0	0.012	2936	171	0	0	213878	6417	Savitzky-Golay,7,2	0.13/0.80	0.235	NBS: ISConc=-1; Initial: LimitLow=0, LimitHigh=100; Retest: LimitLow=0, LimitHigh=100; Recall: LimitLow=0, LimitHigh=100; Recall retest: LimitLow=0, LimitHigh=100	Peak Area	0	0	0
LC	LC	ESI1	1	C12	sample0003_132625	LC745464	LC	MRM+	344.30/85.00	Qualifier	C12 IS	0	0.356	79974	2545	0	0	233377	6590	Savitzky-Golay,7,2	0.13/0.80	0.44	NBS: ISConc=1; Initial: LimitLow=0, LimitHigh=0.33; Retest: LimitLow=0, LimitHigh=0.33; Recall: LimitLow=0, LimitHigh=0.33; Recall retest: LimitLow=0, LimitHigh=0.33; LC: TargetConc=0.28, Stdev=0.09; HC: TargetConc=1.36, Stdev=0.16	Peak Area	0.28	0.01	0.55
LC	LC	ESI1	1	C12 IS	sample0003_132625	LC745464	LC	MRM+	347.30/85.00	IS		1	0	233377	6590	0	0	0	0	Savitzky-Golay,7,2	0.13/0.80	0.147	NBS: Internal Standard;	Peak Area	0	0	0
LC	LC	ESI1	1	C12:1	sample0003_132625	LC745464	LC	MRM+	342.30/85.00	Qualifier	C12 IS	0	0.03	7025	407	0	0	233377	6590	Savitzky-Golay,7,2	0.13/0.80	0.235	NBS: ISConc=-1; Initial: LimitLow=0, LimitHigh=1000; Retest: LimitLow=0, LimitHigh=1000; Recall: LimitLow=0, LimitHigh=1000; Recall retest: LimitLow=0, LimitHigh=10000	Peak Area	0	0	0
LC	LC	ESI1	1	C14	sample0003_132625	LC745464	LC	MRM+	372.30/85.00	Qualifier	C14 IS	0	0.447	101683	3277	0	0	248467	7157	Savitzky-Golay,7,2	0.13/0.80	0.411	NBS: ISConc=1.02; Initial: LimitLow=0, LimitHigh=0.59; Retest: LimitLow=0, LimitHigh=0.59; Recall: LimitLow=0, LimitHigh=0.59; Recall retest: LimitLow=0, LimitHigh=0.59; LC: TargetConc=0.33, Stdev=0.09; HC: TargetConc=1.9, Stdev=0.23	Peak Area	0.33	0.06	0.6
LC	LC	ESI1	1	C14 IS	sample0003_132625	LC745464	LC	MRM+	375.30/85.00	IS		1.02	0	248467	7157	0	0	0	0	Savitzky-Golay,7,2	0.13/0.80	0.323	NBS: Internal Standard;	Peak Area	0	0	0
LC	LC	ESI1	1	C14:1	sample0003_132625	LC745464	LC	MRM+	370.30/85.00	Qualifier	C14 IS	0	0.053	13020	472	0	0	248467	7157	Savitzky-Golay,7,2	0.13/0.80	0.469	NBS: ISConc=-1; Initial: LimitLow=0, LimitHigh=0.32; Retest: LimitLow=0, LimitHigh=0.32; Recall: LimitLow=0, LimitHigh=0.32; Recall retest: LimitLow=0, LimitHigh=0.32	Peak Area	0	0	0
LC	LC	ESI1	1	C14:2	sample0003_132625	LC745464	LC	MRM+	368.30/85.00	Qualifier	C14 IS	0	0.023	5509	228	0	0	248467	7157	Savitzky-Golay,7,2	0.13/0.80	0.205	NBS: ISConc=-1;	Peak Area	0	0	0
LC	LC	ESI1	1	C14OH	sample0003_132625	LC745464	LC	MRM+	388.30/85.00	Qualifier	C14 IS	0	0	0	0	0	0	248467	7157	Savitzky-Golay,7,2	0.13/0.80	0.763	NBS: ISConc=-1; Initial: LimitLow=0, LimitHigh=0.2; Retest: LimitLow=0, LimitHigh=0.2; Recall: LimitLow=0, LimitHigh=0.2; Recall retest: LimitLow=0, LimitHigh=0.2	Peak Area	0	0	0
LC	LC	ESI1	1	C16	sample0003_132625	LC745464	LC	MRM+	400.30/85.00	Qualifier	C16 IS	0	2.246	457909	14224	0	0	194154	6207	Savitzky-Golay,7,2	0.13/0.80	0.381	NBS: ISConc=0.89; Initial: LimitLow=0.3, LimitHigh=8.5; Retest: LimitLow=0.3, LimitHigh=8.5; Recall: LimitLow=0.3, LimitHigh=8.5; Recall retest: LimitLow=0.3, LimitHigh=8.5; LC: TargetConc=2.02, Stdev=0.24; HC: TargetConc=11.7, Stdev=1.4	Peak Area	2.02	1.3	2.74
LC	LC	ESI1	1	C16 IS	sample0003_132625	LC745464	LC	MRM+	403.40/85.00	IS		0.89	0	194154	6207	0	0	0	0	Savitzky-Golay,7,2	0.13/0.80	0.381	NBS: Internal Standard;	Peak Area	0	0	0
LC	LC	ESI1	1	C16:1	sample0003_132625	LC745464	LC	MRM+	398.30/85.00	Qualifier	C16 IS	0	0.078	17053	592	0	0	194154	6207	Savitzky-Golay,7,2	0.13/0.80	0.381	NBS: ISConc=-1;	Peak Area	0	0	0
LC	LC	ESI1	1	C16OH	sample0003_132625	LC745464	LC	MRM+	416.30/85.00	Qualifier	C16 IS	0	0.016	3533	119	0	0	194154	6207	Savitzky-Golay,7,2	0.13/0.80	0.235	NBS: ISConc=-1; Initial: LimitLow=0, LimitHigh=0.19; Retest: LimitLow=0, LimitHigh=0.19; Recall: LimitLow=0, LimitHigh=0.19; Recall retest: LimitLow=0, LimitHigh=0.19	Peak Area	0	0	0
LC	LC	ESI1	1	C16:1OH\C17	sample0003_132625	LC745464	LC	MRM+	414.30/85.00	Qualifier	C16 IS	0	0.056	12119	394	0	0	194154	6207	Savitzky-Golay,7,2	0.13/0.80	0.352	NBS: ISConc=-1; Initial: LimitLow=0, LimitHigh=0.22; Retest: LimitLow=0, LimitHigh=0.22; Recall: LimitLow=0, LimitHigh=0.22; Recall retest: LimitLow=0, LimitHigh=0.22	Peak Area	0	0	0
LC	LC	ESI1	1	C18	sample0003_132625	LC745464	LC	MRM+	428.40/85.00	Qualifier	C18 IS	0	1.485	263149	8357	0	0	197282	6101	Savitzky-Golay,7,2	0.13/0.80	0.147	NBS: ISConc=0.92; Initial: LimitLow=0.13, LimitHigh=2.5; Retest: LimitLow=0.13, LimitHigh=2.5; Recall: LimitLow=0.13, LimitHigh=2.5; Recall retest: LimitLow=0.13, LimitHigh=2.5; LC: TargetConc=1.14, Stdev=0.14; HC: TargetConc=4.32, Stdev=0.52	Peak Area	1.14	0.72	1.56
LC	LC	ESI1	1	C18 IS	sample0003_132625	LC745464	LC	MRM+	431.40/85.00	IS		0.92	0	197282	6101	0	0	0	0	Savitzky-Golay,7,2	0.13/0.80	0.352	NBS: Internal Standard;	Peak Area	0	0	0
LC	LC	ESI1	1	C18:1	sample0003_132625	LC745464	LC	MRM+	426.40/85.00	Qualifier	C18 IS	0	1.532	328513	10446	0	0	197282	6101	Savitzky-Golay,7,2	0.13/0.80	0.293	NBS: ISConc=-1; Initial: LimitLow=0.15, LimitHigh=3.35; Retest: LimitLow=0.15, LimitHigh=3.35; Recall: LimitLow=0.15, LimitHigh=3.35; Recall retest: LimitLow=0.15, LimitHigh=3.35	Peak Area	0	0	0
LC	LC	ESI1	1	C18:2	sample0003_132625	LC745464	LC	MRM+	424.30/85.00	Qualifier	C18 IS	0	0.313	67071	2086	0	0	197282	6101	Savitzky-Golay,7,2	0.13/0.80	0.235	NBS: ISConc=-1;	Peak Area	0	0	0
LC	LC	ESI1	1	C18OH	sample0003_132625	LC745464	LC	MRM+	444.40/85.00	Qualifier	C18 IS	0	0.011	2367	110	0	0	197282	6101	Savitzky-Golay,7,2	0.13/0.80	0.293	NBS: ISConc=-1; Initial: LimitLow=0, LimitHigh=0.14; Retest: LimitLow=0, LimitHigh=0.14; Recall: LimitLow=0, LimitHigh=0.14; Recall retest: LimitLow=0, LimitHigh=0.14	Peak Area	0	0	0
LC	LC	ESI1	1	C18:1OH	sample0003_132625	LC745464	LC	MRM+	442.40/85.00	Qualifier	C18 IS	0	0.035	7399	279	0	0	197282	6101	Savitzky-Golay,7,2	0.13/0.80	0.587	NBS: ISConc=-1; Initial: LimitLow=0, LimitHigh=0.16; Retest: LimitLow=0, LimitHigh=0.16; Recall: LimitLow=0, LimitHigh=0.16; Recall retest: LimitLow=0, LimitHigh=0.16	Peak Area	0	0	0
LC	LC	ESI1	1	C18:2OH	sample0003_132625	LC745464	LC	MRM+	440.30/85.00	Qualifier	C18 IS	0	0.029	6215	239	0	0	197282	6101	Savitzky-Golay,7,2	0.13/0.80	0.264	NBS: ISConc=-1;	Peak Area	0	0	0
LC	LC	ESI1	1	C20	sample0003_132625	LC745464	LC	MRM+	456.40/85.00	Qualifier	C26 IS	0	0.069	4818	247	0	0	76561	3200	Savitzky-Golay,7,2	0.13/0.80	0.352	NBS: ISConc=-1;	Peak Area	0	0	0
LC	LC	ESI1	1	C22	sample0003_132625	LC745464	LC	MRM+	484.40/85.00	Qualifier	C26 IS	0	0.014	956	62	0	0	76561	3200	Savitzky-Golay,7,2	0.13/0.80	0.147	NBS: ISConc=-1;	Peak Area	0	0	0
LC	LC	ESI1	1	C24	sample0003_132625	LC745464	LC	MRM+	512.50/85.00	Qualifier	C26 IS	0	0.037	2580	135	0	0	76561	3200	Savitzky-Golay,7,2	0.13/0.80	0.235	NBS: ISConc=-1;	Peak Area	0	0	0
LC	LC	ESI1	1	C26	sample0003_132625	LC745464	LC	MRM+	540.50/85.00	Qualifier	C26 IS	0	0.598	38509	1689	0	0	76561	3200	Savitzky-Golay,7,2	0.13/0.80	0.176	NBS: ISConc=1.09; LC: TargetConc=0.61, Stdev=0.09; HC: TargetConc=1.66, Stdev=0.2	Peak Area	0.61	0.34	0.88
LC	LC	ESI1	1	C26 IS	sample0003_132625	LC745464	LC	MRM+	543.50/85.00	IS		1.09	0	76561	3200	0	0	0	0	Savitzky-Golay,7,2	0.13/0.80	0.205	NBS: Internal Standard;	Peak Area	0	0	0
LC	LC	ESI1	1	SA	sample0003_132625	LC745464	LC	MRM+	155.10/109.10	Qualifier	SA IS	0	2.973	68980	2123	0	0	1348072	36186	Savitzky-Golay,7,2	0.13/0.80	0.616	NBS: ISConc=58.1; Initial: LimitLow=0, LimitHigh=2; Retest: LimitLow=0, LimitHigh=2; Recall: LimitLow=0, LimitHigh=2; Recall retest: LimitLow=0, LimitHigh=2; LC: TargetConc=2.57, Stdev=0.38; HC: TargetConc=10.4, Stdev=1.2	Peak Area	2.57	1.43	3.71
LC	LC	ESI1	1	SA IS	sample0003_132625	LC745464	LC	MRM+	160.10/114.10	IS		58.1	0	1348072	36186	0	0	0	0	Savitzky-Golay,7,2	0.13/0.80	0.44	NBS: Internal Standard;	Peak Area	0	0	0
LC	LC	ESI1	1	ADO	sample0003_132625	LC745464	LC	MRM+	268.10/136.10	Qualifier	ADO IS	0	2.017	154225	4387	0	0	505256	13850	Savitzky-Golay,7,2	0.13/0.80	0.147	NBS: ISConc=9.44; LC: TargetConc=2.51, Stdev=0.34; HC: TargetConc=6.91, Stdev=0.83	Peak Area	2.51	1.49	3.53
LC	LC	ESI1	1	ADO IS	sample0003_132625	LC745464	LC	MRM+	273.10/136.10	IS		9.44	0	505256	13850	0	0	0	0	Savitzky-Golay,7,2	0.13/0.80	0.176	NBS: Internal Standard;	Peak Area	0	0	0
LC	LC	ESI1	1	D-ADO	sample0003_132625	LC745464	LC	MRM+	252.10/136.10	Qualifier	D-ADO IS	0	0.067	4201	218	0	0	614979	16179	Savitzky-Golay,7,2	0.13/0.80	0.235	NBS: ISConc=9.82;	Peak Area	0	0	0
LC	LC	ESI1	1	D-ADO IS	sample0003_132625	LC745464	LC	MRM+	257.10/136.10	IS		9.82	0	614979	16179	0	0	0	0	Savitzky-Golay,7,2	0.13/0.80	0.293	NBS: Internal Standard;	Peak Area	0	0	0
LC	LC	ESI1	1	C20:0-LPC	sample0003_132625	LC745464	LC	MRM+	552.40/104.10	Qualifier	C26:0-LPC IS	0	1.9	8963	364	0	0	20751	1135	Savitzky-Golay,7,2	0.13/0.80	0.147	NBS: ISConc=-1;	Peak Area	0	0	0
LC	LC	ESI1	1	C22:0-LPC	sample0003_132625	LC745464	LC	MRM+	580.40/104.10	Qualifier	C26:0-LPC IS	0	2.881	13589	538	0	0	20751	1135	Savitzky-Golay,7,2	0.13/0.80	0.352	NBS: ISConc=-1;	Peak Area	0	0	0
LC	LC	ESI1	1	C24:0-LPC	sample0003_132625	LC745464	LC	MRM+	608.50/104.10	Qualifier	C26:0-LPC IS	0	2.828	13335	466	0	0	20751	1135	Savitzky-Golay,7,2	0.13/0.80	0.293	NBS: ISConc=-1;	Peak Area	0	0	0
LC	LC	ESI1	1	C26:0-LPC	sample0003_132625	LC745464	LC	MRM+	636.50/104.10	Qualifier	C26:0-LPC IS	0	1.644	8617	426	0	0	20751	1135	Savitzky-Golay,7,2	0.13/0.80	0.293	NBS: ISConc=4.4; LC: TargetConc=0.92, Stdev=0.11; HC: TargetConc=3.04, Stdev=0.36	Peak Area	0.92	0.59	1.25
LC	LC	ESI1	1	C26:0-LPC IS	sample0003_132625	LC745464	LC	MRM+	640.50/104.10	IS		4.4	0	20751	1135	0	0	0	0	Savitzky-Golay,7,2	0.13/0.80	0.147	NBS: Internal Standard;	Peak Area	0	0	0
LC	LC	ESI1	1	ASA	sample0003_132625	LC745464	LC	MRM+	291.10/70.10	Qualifier	Arg IS	0	1.221	37309	1235	0	0	1448477	38392	Savitzky-Golay,7,2	0.13/0.80	0.293	NBS: --	Peak Area	0	0	0
LC	LC	ESI1	1	ASA anhydride I + II	sample0003_132625	LC745464	LC	MRM+	273.10/70.10	Qualifier	Arg IS	0	0.246	7524	365	0	0	1448477	38392	Savitzky-Golay,7,2	0.13/0.80	0.675	NBS: --	Peak Area	0	0	0
LC	LC			ASATotal	sample0003_132625	LC745464	LC	N/A	0.00/0.00	Qualifier	Arg IS	0	1.482	44833	1600	0	0	1448477	38392	Savitzky-Golay,7,2	0.13/0.80	0	NBS: ISConc=-1; Initial: LimitLow=0, LimitHigh=1.5; Retest: LimitLow=0, LimitHigh=1.5; Recall: LimitLow=0, LimitHigh=1.5; Recall retest: LimitLow=0, LimitHigh=1.5; LC: TargetConc=2.22, Stdev=0.38; HC: TargetConc=39, Stdev=4.7	Peak Area	2.22	1.08	3.36
HC	HC	ESI1	1	Ala	sample0004_132810	HC745464	HC	MRM+	90.10/44.00	Qualifier	Ala IS	0	965.101	1818233	52335	0	0	257823	6970	Savitzky-Golay,7,2	0.13/0.80	0.381	NBS: ISConc=115; Initial: LimitLow=0, LimitHigh=10000; Retest: LimitLow=0, LimitHigh=10000; Recall: LimitLow=0, LimitHigh=10000; Recall retest: LimitLow=0, LimitHigh=10000; LC: TargetConc=479, Stdev=57; HC: TargetConc=967, Stdev=116	Peak Area	967	619	1315
HC	HC	ESI1	1	Ala IS	sample0004_132810	HC745464	HC	MRM+	93.10/47.10	IS		115	0	257823	6970	0	0	0	0	Savitzky-Golay,7,2	0.13/0.80	0.44	NBS: Internal Standard;	Peak Area	0	0	0
HC	HC	ESI1	1	Arg	sample0004_132810	HC745464	HC	MRM+	175.10/70.10	Qualifier	Arg IS	0	143.431	3855475	100770	0	0	1286866	34138	Savitzky-Golay,7,2	0.13/0.80	0.469	NBS: ISConc=47.4; Initial: LimitLow=0, LimitHigh=70; Retest: LimitLow=0, LimitHigh=70; Recall: LimitLow=0, LimitHigh=70; Recall retest: LimitLow=0, LimitHigh=70; LC: TargetConc=24.2, Stdev=2.9; HC: TargetConc=136, Stdev=16	Peak Area	136	88	184
HC	HC	ESI1	1	Arg IS	sample0004_132810	HC745464	HC	MRM+	180.10/75.10	IS		47.4	0	1286866	34138	0	0	0	0	Savitzky-Golay,7,2	0.13/0.80	0.381	NBS: Internal Standard;	Peak Area	0	0	0
HC	HC	ESI1	1	Cit	sample0004_132810	HC745464	HC	MRM+	176.10/113.10	Qualifier	Cit IS	0	171.462	531130	14831	0	0	286329	7753	Savitzky-Golay,7,2	0.13/0.80	0.528	NBS: ISConc=81.8; Initial: LimitLow=0, LimitHigh=80; Retest: LimitLow=0, LimitHigh=80; Recall: LimitLow=0, LimitHigh=80; Recall retest: LimitLow=0, LimitHigh=80; LC: TargetConc=33.1, Stdev=4; HC: TargetConc=147, Stdev=18	Peak Area	147	93	201
HC	HC	ESI1	1	Cit IS	sample0004_132810	HC745464	HC	MRM+	178.10/115.10	IS		81.8	0	286329	7753	0	0	0	0	Savitzky-Golay,7,2	0.13/0.80	0.528	NBS: Internal Standard;	Peak Area	0	0	0
HC	HC	ESI1	1	Gln\Lys	sample0004_132810	HC745464	HC	MRM+	147.10/84.00	Qualifier	Gln\Lys IS	0	1508.46	8479323	228271	0	0	502365	13277	Savitzky-Golay,7,2	0.13/0.80	0.381	NBS: ISConc=99.3; LC: TargetConc=635, Stdev=76; HC: TargetConc=1350, Stdev=160	Peak Area	1350	870	1830
HC	HC	ESI1	1	Gln\Lys IS	sample0004_132810	HC745464	HC	MRM+	152.10/88.10	IS		99.3	0	502365	13277	0	0	0	0	Savitzky-Golay,7,2	0.13/0.80	0.469	NBS: Internal Standard;	Peak Area	0	0	0
HC	HC	ESI1	1	Glu	sample0004_132810	HC745464	HC	MRM+	148.10/84.00	Qualifier	Gln\Lys IS	0	112.052	566880	15530	0	0	502365	13277	Savitzky-Golay,7,2	0.13/0.80	0.411	NBS: ISConc=-1;	Peak Area	0	0	0
HC	HC	ESI1	1	Gly	sample0004_132810	HC745464	HC	MRM+	76.00/30.00	Qualifier	Gly IS	0	1660.46	938708	26750	0	0	337637	10879	Savitzky-Golay,7,2	0.13/0.80	0.264	NBS: ISConc=553; LC: TargetConc=549, Stdev=66; HC: TargetConc=1320, Stdev=160	Peak Area	1320	840	1800
HC	HC	ESI1	1	Gly IS	sample0004_132810	HC745464	HC	MRM+	78.00/32.00	IS		553	0	337637	10879	0	0	0	0	Savitzky-Golay,7,2	0.13/0.80	0.587	NBS: Internal Standard;	Peak Area	0	0	0
HC	HC	ESI1	1	Leu\Ile\Pro-OH	sample0004_132810	HC745464	HC	MRM+	132.10/86.10	Qualifier	Leu\Ile\Pro-OH IS	0	884.62	17246659	491687	0	0	1988799	52797	Savitzky-Golay,7,2	0.13/0.80	0.499	NBS: ISConc=101; Initial: LimitLow=0, LimitHigh=380; Retest: LimitLow=0, LimitHigh=380; Recall: LimitLow=0, LimitHigh=380; Recall retest: LimitLow=0, LimitHigh=380; LC: TargetConc=183, Stdev=22; HC: TargetConc=772, Stdev=93	Peak Area	772	493	1051
HC	HC	ESI1	1	Leu\Ile\Pro-OH IS	sample0004_132810	HC745464	HC	MRM+	135.10/89.10	IS		101	0	1988799	52797	0	0	0	0	Savitzky-Golay,7,2	0.13/0.80	0.704	NBS: Internal Standard;	Peak Area	0	0	0
HC	HC	ESI1	1	Met	sample0004_132810	HC745464	HC	MRM+	150.10/104.10	Qualifier	Met IS	0	205.978	1045362	29426	0	0	586946	16260	Savitzky-Golay,7,2	0.13/0.80	0.587	NBS: ISConc=99.7; Initial: LimitLow=7, LimitHigh=80; Retest: LimitLow=7, LimitHigh=80; Recall: LimitLow=7, LimitHigh=80; Recall retest: LimitLow=7, LimitHigh=80; LC: TargetConc=36, Stdev=4.3; HC: TargetConc=177, Stdev=21	Peak Area	177	114	240
HC	HC	ESI1	1	Met IS	sample0004_132810	HC745464	HC	MRM+	153.10/107.10	IS		99.7	0	586946	16260	0	0	0	0	Savitzky-Golay,7,2	0.13/0.80	0.528	NBS: Internal Standard;	Peak Area	0	0	0
HC	HC	ESI1	1	Orn	sample0004_132810	HC745464	HC	MRM+	133.10/70.10	Qualifier	Orn IS	0	611.391	4218606	110903	0	0	752102	20312	Savitzky-Golay,7,2	0.13/0.80	0.352	NBS: ISConc=109; LC: TargetConc=154, Stdev=18; HC: TargetConc=488, Stdev=59	Peak Area	488	311	665
HC	HC	ESI1	1	Orn IS	sample0004_132810	HC745464	HC	MRM+	139.10/76.10	IS		109	0	752102	20312	0	0	0	0	Savitzky-Golay,7,2	0.13/0.80	0.352	NBS: Internal Standard;	Peak Area	0	0	0
HC	HC	ESI1	1	Phe	sample0004_132810	HC745464	HC	MRM+	166.10/120.10	Qualifier	Phe IS	0	285.377	9065583	242367	0	0	2463347	66018	Savitzky-Golay,7,2	0.13/0.80	0.44	NBS: ISConc=71.8; Initial: LimitLow=0, LimitHigh=120; Retest: LimitLow=0, LimitHigh=120; Recall: LimitLow=0, LimitHigh=120; Recall retest: LimitLow=0, LimitHigh=120; LC: TargetConc=79.4, Stdev=9.5; HC: TargetConc=264, Stdev=32	Peak Area	264	168	360
HC	HC	ESI1	1	Phe IS	sample0004_132810	HC745464	HC	MRM+	172.10/126.10	IS		71.8	0	2463347	66018	0	0	0	0	Savitzky-Golay,7,2	0.13/0.80	0.352	NBS: Internal Standard;	Peak Area	0	0	0
HC	HC	ESI1	1	Pro	sample0004_132810	HC745464	HC	MRM+	116.10/70.10	Qualifier	Pro IS	0	746.964	13286291	354130	0	0	1393083	38299	Savitzky-Golay,7,2	0.13/0.80	0.44	NBS: ISConc=88; LC: TargetConc=235, Stdev=28; HC: TargetConc=683, Stdev=82	Peak Area	683	437	929
HC	HC	ESI1	1	Pro IS	sample0004_132810	HC745464	HC	MRM+	121.10/74.10	IS		88	0	1393083	38299	0	0	0	0	Savitzky-Golay,7,2	0.13/0.80	0.557	NBS: Internal Standard;	Peak Area	0	0	0
HC	HC	ESI1	1	Tyr	sample0004_132810	HC745464	HC	MRM+	182.10/136.10	Qualifier	Tyr IS	0	584.275	4256572	114287	0	0	1029038	28530	Savitzky-Golay,7,2	0.13/0.80	0.616	NBS: ISConc=113; LC: TargetConc=136, Stdev=16; HC: TargetConc=549, Stdev=66	Peak Area	549	351	747
HC	HC	ESI1	1	Tyr IS	sample0004_132810	HC745464	HC	MRM+	188.10/142.10	IS		113	0	1029038	28530	0	0	0	0	Savitzky-Golay,7,2	0.13/0.80	0.616	NBS: Internal Standard;	Peak Area	0	0	0
HC	HC	ESI1	1	Val	sample0004_132810	HC745464	HC	MRM+	118.10/72.10	Qualifier	Val IS	0	558.787	6854787	183019	0	0	1483849	40541	Savitzky-Golay,7,2	0.13/0.80	0.557	NBS: ISConc=108; LC: TargetConc=213, Stdev=26; HC: TargetConc=470, Stdev=56	Peak Area	470	302	638
HC	HC	ESI1	1	Val IS	sample0004_132810	HC745464	HC	MRM+	124.10/77.10	IS		108	0	1483849	40541	0	0	0	0	Savitzky-Golay,7,2	0.13/0.80	0.235	NBS: Internal Standard;	Peak Area	0	0	0
HC	HC	ESI1	1	C0	sample0004_132810	HC745464	HC	MRM+	162.10/103.00	Qualifier	C0 IS	0	177.8	4837940	126466	0	0	400531	11109	Savitzky-Golay,7,2	0.13/0.80	0.381	NBS: ISConc=11.5; Initial: LimitLow=8, LimitHigh=90; Retest: LimitLow=8, LimitHigh=90; Recall: LimitLow=8, LimitHigh=90; Recall retest: LimitLow=8, LimitHigh=90; LC: TargetConc=41, Stdev=4.9; HC: TargetConc=151, Stdev=18	Peak Area	151	97	205
HC	HC	ESI1	1	C0 IS	sample0004_132810	HC745464	HC	MRM+	171.20/103.00	IS		11.5	0	400531	11109	0	0	0	0	Savitzky-Golay,7,2	0.13/0.80	0.323	NBS: Internal Standard;	Peak Area	0	0	0
HC	HC	ESI1	1	C2	sample0004_132810	HC745464	HC	MRM+	204.10/85.00	Qualifier	C2 IS	0	104.514	13364858	352839	0	0	672372	18368	Savitzky-Golay,7,2	0.13/0.80	0.469	NBS: ISConc=4.78; Initial: LimitLow=0, LimitHigh=115; Retest: LimitLow=0, LimitHigh=115; Recall: LimitLow=0, LimitHigh=115; Recall retest: LimitLow=0, LimitHigh=115; LC: TargetConc=27.6, Stdev=3.3; HC: TargetConc=82.4, Stdev=9.9	Peak Area	82.4	52.7	112.1
HC	HC	ESI1	1	C2 IS	sample0004_132810	HC745464	HC	MRM+	207.10/85.00	IS		4.78	0	672372	18368	0	0	0	0	Savitzky-Golay,7,2	0.13/0.80	0.381	NBS: Internal Standard;	Peak Area	0	0	0
HC	HC	ESI1	1	C3	sample0004_132810	HC745464	HC	MRM+	218.10/85.00	Qualifier	C3 IS	0	13.64	1974665	53671	0	0	293888	7911	Savitzky-Golay,7,2	0.13/0.80	0.323	NBS: ISConc=2.03; Initial: LimitLow=0, LimitHigh=6.8; Retest: LimitLow=0, LimitHigh=6.8; Recall: LimitLow=0, LimitHigh=6.8; Recall retest: LimitLow=0, LimitHigh=6.8; LC: TargetConc=4.63, Stdev=0.56; HC: TargetConc=13.3, Stdev=1.6	Peak Area	13.3	8.5	18.1
HC	HC	ESI1	1	C3 IS	sample0004_132810	HC745464	HC	MRM+	221.20/85.00	IS		2.03	0	293888	7911	0	0	0	0	Savitzky-Golay,7,2	0.13/0.80	0.147	NBS: Internal Standard;	Peak Area	0	0	0
HC	HC	ESI1	1	C3DC\C4OH	sample0004_132810	HC745464	HC	MRM+	248.10/85.00	Qualifier	C4 IS	0	0.114	19586	765	0	0	249057	6722	Savitzky-Golay,7,2	0.13/0.80	0.557	NBS: ISConc=-1; Initial: LimitLow=0, LimitHigh=10; Retest: LimitLow=0.04, LimitHigh=10; Recall: LimitLow=0.04, LimitHigh=10; Recall retest: LimitLow=0.04, LimitHigh=10	Peak Area	0	0	0
HC	HC	ESI1	1	C4	sample0004_132810	HC745464	HC	MRM+	232.20/85.00	Qualifier	C4 IS	0	3.085	529859	15667	0	0	249057	6722	Savitzky-Golay,7,2	0.13/0.80	0.323	NBS: ISConc=1.45; Initial: LimitLow=0, LimitHigh=1.5; Retest: LimitLow=0, LimitHigh=1.5; Recall: LimitLow=0, LimitHigh=1.5; Recall retest: LimitLow=0, LimitHigh=1.5; LC: TargetConc=0.74, Stdev=0.1; HC: TargetConc=2.74, Stdev=0.33	Peak Area	2.74	1.75	3.73
HC	HC	ESI1	1	C4 IS	sample0004_132810	HC745464	HC	MRM+	235.20/85.00	IS		1.45	0	249057	6722	0	0	0	0	Savitzky-Golay,7,2	0.13/0.80	0.587	NBS: Internal Standard;	Peak Area	0	0	0
HC	HC	ESI1	1	C4DC\C5OH	sample0004_132810	HC745464	HC	MRM+	262.20/85.00	Qualifier	C5 IS	0	0.467	87974	2551	0	0	286553	7879	Savitzky-Golay,7,2	0.13/0.80	0.499	NBS: ISConc=-1; Initial: LimitLow=0, LimitHigh=0.5; Retest: LimitLow=0, LimitHigh=0.5; Recall: LimitLow=0, LimitHigh=0.5; Recall retest: LimitLow=0, LimitHigh=0.5	Peak Area	0	0	0
HC	HC	ESI1	1	C5	sample0004_132810	HC745464	HC	MRM+	246.20/85.00	Qualifier	C5 IS	0	2.691	528417	14389	0	0	286553	7879	Savitzky-Golay,7,2	0.13/0.80	0.264	NBS: ISConc=1.52; Initial: LimitLow=0, LimitHigh=0.56; Retest: LimitLow=0, LimitHigh=0.56; Recall: LimitLow=0, LimitHigh=0.56; Recall retest: LimitLow=0, LimitHigh=0.56; LC: TargetConc=0.63, Stdev=0.08; HC: TargetConc=2.46, Stdev=0.3	Peak Area	2.46	1.56	3.36
HC	HC	ESI1	1	C5 IS	sample0004_132810	HC745464	HC	MRM+	255.20/85.00	IS		1.52	0	286553	7879	0	0	0	0	Savitzky-Golay,7,2	0.13/0.80	0.44	NBS: Internal Standard;	Peak Area	0	0	0
HC	HC	ESI1	1	C5:1	sample0004_132810	HC745464	HC	MRM+	244.20/85.00	Qualifier	C5 IS	0	0.017	3159	144	0	0	286553	7879	Savitzky-Golay,7,2	0.13/0.80	0.763	NBS: ISConc=-1; Initial: LimitLow=0, LimitHigh=0.15; Retest: LimitLow=0, LimitHigh=0.15; Recall: LimitLow=0, LimitHigh=0.15; Recall retest: LimitLow=0, LimitHigh=0.15	Peak Area	0	0	0
HC	HC	ESI1	1	C5DC\C6OH	sample0004_132810	HC745464	HC	MRM+	276.20/85.00	Qualifier	C5DC\C6OH IS	0	2.525	161129	4472	0	0	95085	2907	Savitzky-Golay,7,2	0.13/0.80	0.411	NBS: ISConc=1.49; Initial: LimitLow=0, LimitHigh=0.3; Retest: LimitLow=0, LimitHigh=0.3; Recall: LimitLow=0, LimitHigh=0.3; Recall retest: LimitLow=0, LimitHigh=0.3; LC: TargetConc=0.39, Stdev=0.09; HC: TargetConc=1.98, Stdev=0.24	Peak Area	1.98	1.26	2.7
HC	HC	ESI1	1	C5DC\C6OH IS	sample0004_132810	HC745464	HC	MRM+	282.20/85.00	IS		1.49	0	95085	2907	0	0	0	0	Savitzky-Golay,7,2	0.13/0.80	0.147	NBS: Internal Standard;	Peak Area	0	0	0
HC	HC	ESI1	1	C6	sample0004_132810	HC745464	HC	MRM+	260.20/85.00	Qualifier	C6 IS	0	1.439	277208	7983	0	0	220305	6094	Savitzky-Golay,7,2	0.13/0.80	0.176	NBS: ISConc=1.03; Initial: LimitLow=0, LimitHigh=0.2; Retest: LimitLow=0, LimitHigh=0.2; Recall: LimitLow=0, LimitHigh=0.2; Recall retest: LimitLow=0, LimitHigh=0.2; LC: TargetConc=0.29, Stdev=0.09; HC: TargetConc=1.4, Stdev=0.17	Peak Area	1.4	0.89	1.91
HC	HC	ESI1	1	C6 IS	sample0004_132810	HC745464	HC	MRM+	263.20/85.00	IS		1.03	0	220305	6094	0	0	0	0	Savitzky-Golay,7,2	0.13/0.80	0.528	NBS: Internal Standard;	Peak Area	0	0	0
HC	HC	ESI1	1	C6DC	sample0004_132810	HC745464	HC	MRM+	290.20/85.00	Qualifier	C5DC\C6OH IS	0	0.14	8913	311	0	0	95085	2907	Savitzky-Golay,7,2	0.13/0.80	0.176	NBS: ISConc=-1;	Peak Area	0	0	0
HC	HC	ESI1	1	C8	sample0004_132810	HC745464	HC	MRM+	288.20/85.00	Qualifier	C8 IS	0	2.919	589737	15995	0	0	212213	5603	Savitzky-Golay,7,2	0.13/0.80	0.147	NBS: ISConc=1.04; Initial: LimitLow=0, LimitHigh=0.4; Retest: LimitLow=0, LimitHigh=0.4; Recall: LimitLow=0, LimitHigh=0.4; Recall retest: LimitLow=0, LimitHigh=0.4; LC: TargetConc=0.55, Stdev=0.08; HC: TargetConc=2.76, Stdev=0.33	Peak Area	2.76	1.77	3.75
HC	HC	ESI1	1	C8 IS	sample0004_132810	HC745464	HC	MRM+	291.20/85.00	IS		1.04	0	212213	5603	0	0	0	0	Savitzky-Golay,7,2	0.13/0.80	0.557	NBS: Internal Standard;	Peak Area	0	0	0
HC	HC	ESI1	1	C8:1	sample0004_132810	HC745464	HC	MRM+	286.20/85.00	Qualifier	C8 IS	0	0.048	9838	418	0	0	212213	5603	Savitzky-Golay,7,2	0.13/0.80	0.264	NBS: ISConc=-1;	Peak Area	0	0	0
HC	HC	ESI1	1	C10	sample0004_132810	HC745464	HC	MRM+	316.20/85.00	Qualifier	C10 IS	0	2.417	410805	10882	0	0	185635	5085	Savitzky-Golay,7,2	0.13/0.80	0.323	NBS: ISConc=0.91; Initial: LimitLow=0, LimitHigh=0.29; Retest: LimitLow=0, LimitHigh=0.29; Recall: LimitLow=0, LimitHigh=0.29; Recall retest: LimitLow=0, LimitHigh=0.29; LC: TargetConc=0.31, Stdev=0.09; HC: TargetConc=2.02, Stdev=0.24	Peak Area	2.02	1.3	2.74
HC	HC	ESI1	1	C10 IS	sample0004_132810	HC745464	HC	MRM+	319.30/85.00	IS		0.91	0	185635	5085	0	0	0	0	Savitzky-Golay,7,2	0.13/0.80	0.587	NBS: Internal Standard;	Peak Area	0	0	0
HC	HC	ESI1	1	C10:1	sample0004_132810	HC745464	HC	MRM+	314.20/85.00	Qualifier	C10 IS	0	0.04	8058	374	0	0	185635	5085	Savitzky-Golay,7,2	0.13/0.80	0.411	NBS: ISConc=-1; Initial: LimitLow=0, LimitHigh=0.3; Retest: LimitLow=0, LimitHigh=0.3; Recall: LimitLow=0, LimitHigh=0.3; Recall retest: LimitLow=0, LimitHigh=0.3	Peak Area	0	0	0
HC	HC	ESI1	1	C10:2	sample0004_132810	HC745464	HC	MRM+	312.20/85.00	Qualifier	C10 IS	0	0.01	2112	97	0	0	185635	5085	Savitzky-Golay,7,2	0.13/0.80	0.381	NBS: ISConc=-1; Initial: LimitLow=0, LimitHigh=100; Retest: LimitLow=0, LimitHigh=100; Recall: LimitLow=0, LimitHigh=100; Recall retest: LimitLow=0, LimitHigh=100	Peak Area	0	0	0
HC	HC	ESI1	1	C12	sample0004_132810	HC745464	HC	MRM+	344.30/85.00	Qualifier	C12 IS	0	1.496	301045	8438	0	0	209277	5964	Savitzky-Golay,7,2	0.13/0.80	0.381	NBS: ISConc=1; Initial: LimitLow=0, LimitHigh=0.33; Retest: LimitLow=0, LimitHigh=0.33; Recall: LimitLow=0, LimitHigh=0.33; Recall retest: LimitLow=0, LimitHigh=0.33; LC: TargetConc=0.28, Stdev=0.09; HC: TargetConc=1.36, Stdev=0.16	Peak Area	1.36	0.88	1.84
HC	HC	ESI1	1	C12 IS	sample0004_132810	HC745464	HC	MRM+	347.30/85.00	IS		1	0	209277	5964	0	0	0	0	Savitzky-Golay,7,2	0.13/0.80	0.147	NBS: Internal Standard;	Peak Area	0	0	0
HC	HC	ESI1	1	C12:1	sample0004_132810	HC745464	HC	MRM+	342.30/85.00	Qualifier	C12 IS	0	0.032	6765	276	0	0	209277	5964	Savitzky-Golay,7,2	0.13/0.80	0.176	NBS: ISConc=-1; Initial: LimitLow=0, LimitHigh=1000; Retest: LimitLow=0, LimitHigh=1000; Recall: LimitLow=0, LimitHigh=1000; Recall retest: LimitLow=0, LimitHigh=10000	Peak Area	0	0	0
HC	HC	ESI1	1	C14	sample0004_132810	HC745464	HC	MRM+	372.30/85.00	Qualifier	C14 IS	0	2.322	476234	13604	0	0	223887	6902	Savitzky-Golay,7,2	0.13/0.80	0.147	NBS: ISConc=1.02; Initial: LimitLow=0, LimitHigh=0.59; Retest: LimitLow=0, LimitHigh=0.59; Recall: LimitLow=0, LimitHigh=0.59; Recall retest: LimitLow=0, LimitHigh=0.59; LC: TargetConc=0.33, Stdev=0.09; HC: TargetConc=1.9, Stdev=0.23	Peak Area	1.9	1.21	2.59
HC	HC	ESI1	1	C14 IS	sample0004_132810	HC745464	HC	MRM+	375.30/85.00	IS		1.02	0	223887	6902	0	0	0	0	Savitzky-Golay,7,2	0.13/0.80	0.352	NBS: Internal Standard;	Peak Area	0	0	0
HC	HC	ESI1	1	C14:1	sample0004_132810	HC745464	HC	MRM+	370.30/85.00	Qualifier	C14 IS	0	0.061	13435	564	0	0	223887	6902	Savitzky-Golay,7,2	0.13/0.80	0.176	NBS: ISConc=-1; Initial: LimitLow=0, LimitHigh=0.32; Retest: LimitLow=0, LimitHigh=0.32; Recall: LimitLow=0, LimitHigh=0.32; Recall retest: LimitLow=0, LimitHigh=0.32	Peak Area	0	0	0
HC	HC	ESI1	1	C14:2	sample0004_132810	HC745464	HC	MRM+	368.30/85.00	Qualifier	C14 IS	0	0.026	5742	258	0	0	223887	6902	Savitzky-Golay,7,2	0.13/0.80	0.293	NBS: ISConc=-1;	Peak Area	0	0	0
HC	HC	ESI1	1	C14OH	sample0004_132810	HC745464	HC	MRM+	388.30/85.00	Qualifier	C14 IS	0	0	0	0	0	0	223887	6902	Savitzky-Golay,7,2	0.13/0.80	0.763	NBS: ISConc=-1; Initial: LimitLow=0, LimitHigh=0.2; Retest: LimitLow=0, LimitHigh=0.2; Recall: LimitLow=0, LimitHigh=0.2; Recall retest: LimitLow=0, LimitHigh=0.2	Peak Area	0	0	0
HC	HC	ESI1	1	C16	sample0004_132810	HC745464	HC	MRM+	400.30/85.00	Qualifier	C16 IS	0	11.446	2258083	65639	0	0	187871	5522	Savitzky-Golay,7,2	0.13/0.80	0.293	NBS: ISConc=0.89; Initial: LimitLow=0.3, LimitHigh=8.5; Retest: LimitLow=0.3, LimitHigh=8.5; Recall: LimitLow=0.3, LimitHigh=8.5; Recall retest: LimitLow=0.3, LimitHigh=8.5; LC: TargetConc=2.02, Stdev=0.24; HC: TargetConc=11.7, Stdev=1.4	Peak Area	11.7	7.5	15.9
HC	HC	ESI1	1	C16 IS	sample0004_132810	HC745464	HC	MRM+	403.40/85.00	IS		0.89	0	187871	5522	0	0	0	0	Savitzky-Golay,7,2	0.13/0.80	0.205	NBS: Internal Standard;	Peak Area	0	0	0
HC	HC	ESI1	1	C16:1	sample0004_132810	HC745464	HC	MRM+	398.30/85.00	Qualifier	C16 IS	0	0.09	18982	658	0	0	187871	5522	Savitzky-Golay,7,2	0.13/0.80	0.264	NBS: ISConc=-1;	Peak Area	0	0	0
HC	HC	ESI1	1	C16OH	sample0004_132810	HC745464	HC	MRM+	416.30/85.00	Qualifier	C16 IS	0	0.051	10734	329	0	0	187871	5522	Savitzky-Golay,7,2	0.13/0.80	0.528	NBS: ISConc=-1; Initial: LimitLow=0, LimitHigh=0.19; Retest: LimitLow=0, LimitHigh=0.19; Recall: LimitLow=0, LimitHigh=0.19; Recall retest: LimitLow=0, LimitHigh=0.19	Peak Area	0	0	0
HC	HC	ESI1	1	C16:1OH\C17	sample0004_132810	HC745464	HC	MRM+	414.30/85.00	Qualifier	C16 IS	0	0.069	14485	460	0	0	187871	5522	Savitzky-Golay,7,2	0.13/0.80	0.616	NBS: ISConc=-1; Initial: LimitLow=0, LimitHigh=0.22; Retest: LimitLow=0, LimitHigh=0.22; Recall: LimitLow=0, LimitHigh=0.22; Recall retest: LimitLow=0, LimitHigh=0.22	Peak Area	0	0	0
HC	HC	ESI1	1	C18	sample0004_132810	HC745464	HC	MRM+	428.40/85.00	Qualifier	C18 IS	0	5.368	843766	28266	0	0	174987	5485	Savitzky-Golay,7,2	0.13/0.80	0.352	NBS: ISConc=0.92; Initial: LimitLow=0.13, LimitHigh=2.5; Retest: LimitLow=0.13, LimitHigh=2.5; Recall: LimitLow=0.13, LimitHigh=2.5; Recall retest: LimitLow=0.13, LimitHigh=2.5; LC: TargetConc=1.14, Stdev=0.14; HC: TargetConc=4.32, Stdev=0.52	Peak Area	4.32	2.76	5.88
HC	HC	ESI1	1	C18 IS	sample0004_132810	HC745464	HC	MRM+	431.40/85.00	IS		0.92	0	174987	5485	0	0	0	0	Savitzky-Golay,7,2	0.13/0.80	0.352	NBS: Internal Standard;	Peak Area	0	0	0
HC	HC	ESI1	1	C18:1	sample0004_132810	HC745464	HC	MRM+	426.40/85.00	Qualifier	C18 IS	0	1.43	271961	8998	0	0	174987	5485	Savitzky-Golay,7,2	0.13/0.80	0.147	NBS: ISConc=-1; Initial: LimitLow=0.15, LimitHigh=3.35; Retest: LimitLow=0.15, LimitHigh=3.35; Recall: LimitLow=0.15, LimitHigh=3.35; Recall retest: LimitLow=0.15, LimitHigh=3.35	Peak Area	0	0	0
HC	HC	ESI1	1	C18:2	sample0004_132810	HC745464	HC	MRM+	424.30/85.00	Qualifier	C18 IS	0	0.276	52554	1705	0	0	174987	5485	Savitzky-Golay,7,2	0.13/0.80	0.293	NBS: ISConc=-1;	Peak Area	0	0	0
HC	HC	ESI1	1	C18OH	sample0004_132810	HC745464	HC	MRM+	444.40/85.00	Qualifier	C18 IS	0	0.026	4905	192	0	0	174987	5485	Savitzky-Golay,7,2	0.13/0.80	0.704	NBS: ISConc=-1; Initial: LimitLow=0, LimitHigh=0.14; Retest: LimitLow=0, LimitHigh=0.14; Recall: LimitLow=0, LimitHigh=0.14; Recall retest: LimitLow=0, LimitHigh=0.14	Peak Area	0	0	0
HC	HC	ESI1	1	C18:1OH	sample0004_132810	HC745464	HC	MRM+	442.40/85.00	Qualifier	C18 IS	0	0.099	18736	647	0	0	174987	5485	Savitzky-Golay,7,2	0.13/0.80	0.293	NBS: ISConc=-1; Initial: LimitLow=0, LimitHigh=0.16; Retest: LimitLow=0, LimitHigh=0.16; Recall: LimitLow=0, LimitHigh=0.16; Recall retest: LimitLow=0, LimitHigh=0.16	Peak Area	0	0	0
HC	HC	ESI1	1	C18:2OH	sample0004_132810	HC745464	HC	MRM+	440.30/85.00	Qualifier	C18 IS	0	0.017	3156	177	0	0	174987	5485	Savitzky-Golay,7,2	0.13/0.80	0.733	NBS: ISConc=-1;	Peak Area	0	0	0
HC	HC	ESI1	1	C20	sample0004_132810	HC745464	HC	MRM+	456.40/85.00	Qualifier	C26 IS	0	0.1	7149	315	0	0	77578	3512	Savitzky-Golay,7,2	0.13/0.80	0.411	NBS: ISConc=-1;	Peak Area	0	0	0
HC	HC	ESI1	1	C22	sample0004_132810	HC745464	HC	MRM+	484.40/85.00	Qualifier	C26 IS	0	0.014	970	73	0	0	77578	3512	Savitzky-Golay,7,2	0.13/0.80	0.147	NBS: ISConc=-1;	Peak Area	0	0	0
HC	HC	ESI1	1	C24	sample0004_132810	HC745464	HC	MRM+	512.50/85.00	Qualifier	C26 IS	0	0.033	2372	154	0	0	77578	3512	Savitzky-Golay,7,2	0.13/0.80	0.235	NBS: ISConc=-1;	Peak Area	0	0	0
HC	HC	ESI1	1	C26	sample0004_132810	HC745464	HC	MRM+	540.50/85.00	Qualifier	C26 IS	0	1.463	95536	4186	0	0	77578	3512	Savitzky-Golay,7,2	0.13/0.80	0.176	NBS: ISConc=1.09; LC: TargetConc=0.61, Stdev=0.09; HC: TargetConc=1.66, Stdev=0.2	Peak Area	1.66	1.06	2.26
HC	HC	ESI1	1	C26 IS	sample0004_132810	HC745464	HC	MRM+	543.50/85.00	IS		1.09	0	77578	3512	0	0	0	0	Savitzky-Golay,7,2	0.13/0.80	0.176	NBS: Internal Standard;	Peak Area	0	0	0
HC	HC	ESI1	1	SA	sample0004_132810	HC745464	HC	MRM+	155.10/109.10	Qualifier	SA IS	0	10.372	225639	6668	0	0	1263971	35081	Savitzky-Golay,7,2	0.13/0.80	0.352	NBS: ISConc=58.1; Initial: LimitLow=0, LimitHigh=2; Retest: LimitLow=0, LimitHigh=2; Recall: LimitLow=0, LimitHigh=2; Recall retest: LimitLow=0, LimitHigh=2; LC: TargetConc=2.57, Stdev=0.38; HC: TargetConc=10.4, Stdev=1.2	Peak Area	10.4	6.8	14
HC	HC	ESI1	1	SA IS	sample0004_132810	HC745464	HC	MRM+	160.10/114.10	IS		58.1	0	1263971	35081	0	0	0	0	Savitzky-Golay,7,2	0.13/0.80	0.499	NBS: Internal Standard;	Peak Area	0	0	0
HC	HC	ESI1	1	ADO	sample0004_132810	HC745464	HC	MRM+	268.10/136.10	Qualifier	ADO IS	0	5.103	310087	8517	0	0	401518	11185	Savitzky-Golay,7,2	0.13/0.80	0.411	NBS: ISConc=9.44; LC: TargetConc=2.51, Stdev=0.34; HC: TargetConc=6.91, Stdev=0.83	Peak Area	6.91	4.42	9.4
HC	HC	ESI1	1	ADO IS	sample0004_132810	HC745464	HC	MRM+	273.10/136.10	IS		9.44	0	401518	11185	0	0	0	0	Savitzky-Golay,7,2	0.13/0.80	0.147	NBS: Internal Standard;	Peak Area	0	0	0
HC	HC	ESI1	1	D-ADO	sample0004_132810	HC745464	HC	MRM+	252.10/136.10	Qualifier	D-ADO IS	0	0.087	3965	198	0	0	445725	12089	Savitzky-Golay,7,2	0.13/0.80	0.44	NBS: ISConc=9.82;	Peak Area	0	0	0
HC	HC	ESI1	1	D-ADO IS	sample0004_132810	HC745464	HC	MRM+	257.10/136.10	IS		9.82	0	445725	12089	0	0	0	0	Savitzky-Golay,7,2	0.13/0.80	0.381	NBS: Internal Standard;	Peak Area	0	0	0
HC	HC	ESI1	1	C20:0-LPC	sample0004_132810	HC745464	HC	MRM+	552.40/104.10	Qualifier	C26:0-LPC IS	0	2.132	11100	457	0	0	22911	1257	Savitzky-Golay,7,2	0.13/0.80	0.616	NBS: ISConc=-1;	Peak Area	0	0	0
HC	HC	ESI1	1	C22:0-LPC	sample0004_132810	HC745464	HC	MRM+	580.40/104.10	Qualifier	C26:0-LPC IS	0	2.219	11557	448	0	0	22911	1257	Savitzky-Golay,7,2	0.13/0.80	0.205	NBS: ISConc=-1;	Peak Area	0	0	0
HC	HC	ESI1	1	C24:0-LPC	sample0004_132810	HC745464	HC	MRM+	608.50/104.10	Qualifier	C26:0-LPC IS	0	2.153	11209	411	0	0	22911	1257	Savitzky-Golay,7,2	0.13/0.80	0.264	NBS: ISConc=-1;	Peak Area	0	0	0
HC	HC	ESI1	1	C26:0-LPC	sample0004_132810	HC745464	HC	MRM+	636.50/104.10	Qualifier	C26:0-LPC IS	0	2.652	15343	846	0	0	22911	1257	Savitzky-Golay,7,2	0.13/0.80	0.147	NBS: ISConc=4.4; LC: TargetConc=0.92, Stdev=0.11; HC: TargetConc=3.04, Stdev=0.36	Peak Area	3.04	1.96	4.12
HC	HC	ESI1	1	C26:0-LPC IS	sample0004_132810	HC745464	HC	MRM+	640.50/104.10	IS		4.4	0	22911	1257	0	0	0	0	Savitzky-Golay,7,2	0.13/0.80	0.176	NBS: Internal Standard;	Peak Area	0	0	0
HC	HC	ESI1	1	ASA	sample0004_132810	HC745464	HC	MRM+	291.10/70.10	Qualifier	Arg IS	0	19.902	540309	14907	0	0	1286866	34138	Savitzky-Golay,7,2	0.13/0.80	0.176	NBS: --	Peak Area	0	0	0
HC	HC	ESI1	1	ASA anhydride I + II	sample0004_132810	HC745464	HC	MRM+	273.10/70.10	Qualifier	Arg IS	0	3.398	92251	2864	0	0	1286866	34138	Savitzky-Golay,7,2	0.13/0.80	0.176	NBS: --	Peak Area	0	0	0
HC	HC			ASATotal	sample0004_132810	HC745464	HC	N/A	0.00/0.00	Qualifier	Arg IS	0	23.533	632560	17771	0	0	1286866	34138	Savitzky-Golay,7,2	0.13/0.80	0	NBS: ISConc=-1; Initial: LimitLow=0, LimitHigh=1.5; Retest: LimitLow=0, LimitHigh=1.5; Recall: LimitLow=0, LimitHigh=1.5; Recall retest: LimitLow=0, LimitHigh=1.5; LC: TargetConc=2.22, Stdev=0.38; HC: TargetConc=39, Stdev=4.7	Peak Area	39	24.9	53.1
HIE with sampling at different times (A)	HIE-6h	ESI1	1	Ala	sample0008_133506	8000086434	Initial	MRM+	90.10/44.00	Qualifier	Ala IS	0	403.532	853810	23957	0	0	289553	8292	Savitzky-Golay,7,2	0.13/0.80	0.205	NBS: ISConc=115; Initial: LimitLow=0, LimitHigh=10000; Retest: LimitLow=0, LimitHigh=10000; Recall: LimitLow=0, LimitHigh=10000; Recall retest: LimitLow=0, LimitHigh=10000; LC: TargetConc=479, Stdev=57; HC: TargetConc=967, Stdev=116	Peak Area	5000	0	10000
HIE with sampling at different times (A)	HIE-6h	ESI1	1	Ala IS	sample0008_133506	8000086434	Initial	MRM+	93.10/47.10	IS		115	0	289553	8292	0	0	0	0	Savitzky-Golay,7,2	0.13/0.80	0.381	NBS: Internal Standard;	Peak Area	0	0	0
HIE with sampling at different times (A)	HIE-6h	ESI1	1	Arg	sample0008_133506	8000086434	Initial	MRM+	175.10/70.10	Qualifier	Arg IS	0	126.134	3207058	86703	0	0	1217238	33871	Savitzky-Golay,7,2	0.13/0.80	0.499	NBS: ISConc=47.4; Initial: LimitLow=0, LimitHigh=70; Retest: LimitLow=0, LimitHigh=70; Recall: LimitLow=0, LimitHigh=70; Recall retest: LimitLow=0, LimitHigh=70; LC: TargetConc=24.2, Stdev=2.9; HC: TargetConc=136, Stdev=16	Peak Area	35	0	70
HIE with sampling at different times (A)	HIE-6h	ESI1	1	Arg IS	sample0008_133506	8000086434	Initial	MRM+	180.10/75.10	IS		47.4	0	1217238	33871	0	0	0	0	Savitzky-Golay,7,2	0.13/0.80	0.469	NBS: Internal Standard;	Peak Area	0	0	0
HIE with sampling at different times (A)	HIE-6h	ESI1	1	Cit	sample0008_133506	8000086434	Initial	MRM+	176.10/113.10	Qualifier	Cit IS	0	34.142	129356	3777	0	0	350215	10360	Savitzky-Golay,7,2	0.13/0.80	0.587	NBS: ISConc=81.8; Initial: LimitLow=0, LimitHigh=80; Retest: LimitLow=0, LimitHigh=80; Recall: LimitLow=0, LimitHigh=80; Recall retest: LimitLow=0, LimitHigh=80; LC: TargetConc=33.1, Stdev=4; HC: TargetConc=147, Stdev=18	Peak Area	40	0	80
HIE with sampling at different times (A)	HIE-6h	ESI1	1	Cit IS	sample0008_133506	8000086434	Initial	MRM+	178.10/115.10	IS		81.8	0	350215	10360	0	0	0	0	Savitzky-Golay,7,2	0.13/0.80	0.469	NBS: Internal Standard;	Peak Area	0	0	0
HIE with sampling at different times (A)	HIE-6h	ESI1	1	Gln\Lys	sample0008_133506	8000086434	Initial	MRM+	147.10/84.00	Qualifier	Gln\Lys IS	0	143.985	1028854	28520	0	0	638600	17547	Savitzky-Golay,7,2	0.13/0.80	0.205	NBS: ISConc=99.3; LC: TargetConc=635, Stdev=76; HC: TargetConc=1350, Stdev=160	Peak Area	0	0	0
HIE with sampling at different times (A)	HIE-6h	ESI1	1	Gln\Lys IS	sample0008_133506	8000086434	Initial	MRM+	152.10/88.10	IS		99.3	0	638600	17547	0	0	0	0	Savitzky-Golay,7,2	0.13/0.80	0.205	NBS: Internal Standard;	Peak Area	0	0	0
HIE with sampling at different times (A)	HIE-6h	ESI1	1	Glu	sample0008_133506	8000086434	Initial	MRM+	148.10/84.00	Qualifier	Gln\Lys IS	0	133.754	860174	24365	0	0	638600	17547	Savitzky-Golay,7,2	0.13/0.80	0.205	NBS: ISConc=-1;	Peak Area	0	0	0
HIE with sampling at different times (A)	HIE-6h	ESI1	1	Gly	sample0008_133506	8000086434	Initial	MRM+	76.00/30.00	Qualifier	Gly IS	0	311.477	214675	5997	0	0	411627	11960	Savitzky-Golay,7,2	0.13/0.80	0.235	NBS: ISConc=553; LC: TargetConc=549, Stdev=66; HC: TargetConc=1320, Stdev=160	Peak Area	0	0	0
HIE with sampling at different times (A)	HIE-6h	ESI1	1	Gly IS	sample0008_133506	8000086434	Initial	MRM+	78.00/32.00	IS		553	0	411627	11960	0	0	0	0	Savitzky-Golay,7,2	0.13/0.80	0.205	NBS: Internal Standard;	Peak Area	0	0	0
HIE with sampling at different times (A)	HIE-6h	ESI1	1	Leu\Ile\Pro-OH	sample0008_133506	8000086434	Initial	MRM+	132.10/86.10	Qualifier	Leu\Ile\Pro-OH IS	0	230.825	6019956	174227	0	0	2660442	79547	Savitzky-Golay,7,2	0.13/0.80	0.205	NBS: ISConc=101; Initial: LimitLow=0, LimitHigh=380; Retest: LimitLow=0, LimitHigh=380; Recall: LimitLow=0, LimitHigh=380; Recall retest: LimitLow=0, LimitHigh=380; LC: TargetConc=183, Stdev=22; HC: TargetConc=772, Stdev=93	Peak Area	190	0	380
HIE with sampling at different times (A)	HIE-6h	ESI1	1	Leu\Ile\Pro-OH IS	sample0008_133506	8000086434	Initial	MRM+	135.10/89.10	IS		101	0	2660442	79547	0	0	0	0	Savitzky-Golay,7,2	0.13/0.80	0.176	NBS: Internal Standard;	Peak Area	0	0	0
HIE with sampling at different times (A)	HIE-6h	ESI1	1	Met	sample0008_133506	8000086434	Initial	MRM+	150.10/104.10	Qualifier	Met IS	0	13.884	69733	1941	0	0	580847	16728	Savitzky-Golay,7,2	0.13/0.80	0.323	NBS: ISConc=99.7; Initial: LimitLow=7, LimitHigh=80; Retest: LimitLow=7, LimitHigh=80; Recall: LimitLow=7, LimitHigh=80; Recall retest: LimitLow=7, LimitHigh=80; LC: TargetConc=36, Stdev=4.3; HC: TargetConc=177, Stdev=21	Peak Area	43.5	7	80
HIE with sampling at different times (A)	HIE-6h	ESI1	1	Met IS	sample0008_133506	8000086434	Initial	MRM+	153.10/107.10	IS		99.7	0	580847	16728	0	0	0	0	Savitzky-Golay,7,2	0.13/0.80	0.205	NBS: Internal Standard;	Peak Area	0	0	0
HIE with sampling at different times (A)	HIE-6h	ESI1	1	Orn	sample0008_133506	8000086434	Initial	MRM+	133.10/70.10	Qualifier	Orn IS	0	12.39	91290	2888	0	0	803091	23265	Savitzky-Golay,7,2	0.13/0.80	0.352	NBS: ISConc=109; LC: TargetConc=154, Stdev=18; HC: TargetConc=488, Stdev=59	Peak Area	0	0	0
HIE with sampling at different times (A)	HIE-6h	ESI1	1	Orn IS	sample0008_133506	8000086434	Initial	MRM+	139.10/76.10	IS		109	0	803091	23265	0	0	0	0	Savitzky-Golay,7,2	0.13/0.80	0.205	NBS: Internal Standard;	Peak Area	0	0	0
HIE with sampling at different times (A)	HIE-6h	ESI1	1	Phe	sample0008_133506	8000086434	Initial	MRM+	166.10/120.10	Qualifier	Phe IS	0	62.275	2514037	70320	0	0	3130426	85774	Savitzky-Golay,7,2	0.13/0.80	0.381	NBS: ISConc=71.8; Initial: LimitLow=0, LimitHigh=120; Retest: LimitLow=0, LimitHigh=120; Recall: LimitLow=0, LimitHigh=120; Recall retest: LimitLow=0, LimitHigh=120; LC: TargetConc=79.4, Stdev=9.5; HC: TargetConc=264, Stdev=32	Peak Area	60	0	120
HIE with sampling at different times (A)	HIE-6h	ESI1	1	Phe IS	sample0008_133506	8000086434	Initial	MRM+	172.10/126.10	IS		71.8	0	3130426	85774	0	0	0	0	Savitzky-Golay,7,2	0.13/0.80	0.205	NBS: Internal Standard;	Peak Area	0	0	0
HIE with sampling at different times (A)	HIE-6h	ESI1	1	Pro	sample0008_133506	8000086434	Initial	MRM+	116.10/70.10	Qualifier	Pro IS	0	106.094	2436285	68896	0	0	1798490	50132	Savitzky-Golay,7,2	0.13/0.80	0.323	NBS: ISConc=88; LC: TargetConc=235, Stdev=28; HC: TargetConc=683, Stdev=82	Peak Area	0	0	0
HIE with sampling at different times (A)	HIE-6h	ESI1	1	Pro IS	sample0008_133506	8000086434	Initial	MRM+	121.10/74.10	IS		88	0	1798490	50132	0	0	0	0	Savitzky-Golay,7,2	0.13/0.80	0.205	NBS: Internal Standard;	Peak Area	0	0	0
HIE with sampling at different times (A)	HIE-6h	ESI1	1	Tyr	sample0008_133506	8000086434	Initial	MRM+	182.10/136.10	Qualifier	Tyr IS	0	101.047	841850	23509	0	0	1176793	31457	Savitzky-Golay,7,2	0.13/0.80	0.44	NBS: ISConc=113; LC: TargetConc=136, Stdev=16; HC: TargetConc=549, Stdev=66	Peak Area	0	0	0
HIE with sampling at different times (A)	HIE-6h	ESI1	1	Tyr IS	sample0008_133506	8000086434	Initial	MRM+	188.10/142.10	IS		113	0	1176793	31457	0	0	0	0	Savitzky-Golay,7,2	0.13/0.80	0.205	NBS: Internal Standard;	Peak Area	0	0	0
HIE with sampling at different times (A)	HIE-6h	ESI1	1	Val	sample0008_133506	8000086434	Initial	MRM+	118.10/72.10	Qualifier	Val IS	0	151.598	2301450	69464	0	0	1836322	55649	Savitzky-Golay,7,2	0.13/0.80	0.205	NBS: ISConc=108; LC: TargetConc=213, Stdev=26; HC: TargetConc=470, Stdev=56	Peak Area	0	0	0
HIE with sampling at different times (A)	HIE-6h	ESI1	1	Val IS	sample0008_133506	8000086434	Initial	MRM+	124.10/77.10	IS		108	0	1836322	55649	0	0	0	0	Savitzky-Golay,7,2	0.13/0.80	0.205	NBS: Internal Standard;	Peak Area	0	0	0
HIE with sampling at different times (A)	HIE-6h	ESI1	1	C0	sample0008_133506	8000086434	Initial	MRM+	162.10/103.00	Qualifier	C0 IS	0	12.124	423586	12617	0	0	514270	14570	Savitzky-Golay,7,2	0.13/0.80	0.763	NBS: ISConc=11.5; Initial: LimitLow=8, LimitHigh=90; Retest: LimitLow=8, LimitHigh=90; Recall: LimitLow=8, LimitHigh=90; Recall retest: LimitLow=8, LimitHigh=90; LC: TargetConc=41, Stdev=4.9; HC: TargetConc=151, Stdev=18	Peak Area	49	8	90
HIE with sampling at different times (A)	HIE-6h	ESI1	1	C0 IS	sample0008_133506	8000086434	Initial	MRM+	171.20/103.00	IS		11.5	0	514270	14570	0	0	0	0	Savitzky-Golay,7,2	0.13/0.80	0.763	NBS: Internal Standard;	Peak Area	0	0	0
HIE with sampling at different times (A)	HIE-6h	ESI1	1	C2	sample0008_133506	8000086434	Initial	MRM+	204.10/85.00	Qualifier	C2 IS	0	2.989	599467	17756	0	0	1054410	28979	Savitzky-Golay,7,2	0.13/0.80	0.763	NBS: ISConc=4.78; Initial: LimitLow=0, LimitHigh=115; Retest: LimitLow=0, LimitHigh=115; Recall: LimitLow=0, LimitHigh=115; Recall retest: LimitLow=0, LimitHigh=115; LC: TargetConc=27.6, Stdev=3.3; HC: TargetConc=82.4, Stdev=9.9	Peak Area	57.5	0	115
HIE with sampling at different times (A)	HIE-6h	ESI1	1	C2 IS	sample0008_133506	8000086434	Initial	MRM+	207.10/85.00	IS		4.78	0	1054410	28979	0	0	0	0	Savitzky-Golay,7,2	0.13/0.80	0.352	NBS: Internal Standard;	Peak Area	0	0	0
HIE with sampling at different times (A)	HIE-6h	ESI1	1	C3	sample0008_133506	8000086434	Initial	MRM+	218.10/85.00	Qualifier	C3 IS	0	0.16	35603	1174	0	0	450491	13841	Savitzky-Golay,7,2	0.13/0.80	0.381	NBS: ISConc=2.03; Initial: LimitLow=0, LimitHigh=6.8; Retest: LimitLow=0, LimitHigh=6.8; Recall: LimitLow=0, LimitHigh=6.8; Recall retest: LimitLow=0, LimitHigh=6.8; LC: TargetConc=4.63, Stdev=0.56; HC: TargetConc=13.3, Stdev=1.6	Peak Area	3.4	0	6.8
HIE with sampling at different times (A)	HIE-6h	ESI1	1	C3 IS	sample0008_133506	8000086434	Initial	MRM+	221.20/85.00	IS		2.03	0	450491	13841	0	0	0	0	Savitzky-Golay,7,2	0.13/0.80	0.763	NBS: Internal Standard;	Peak Area	0	0	0
HIE with sampling at different times (A)	HIE-6h	ESI1	1	C3DC\C4OH	sample0008_133506	8000086434	Initial	MRM+	248.10/85.00	Qualifier	C4 IS	0	0.111	30135	943	0	0	394641	10496	Savitzky-Golay,7,2	0.13/0.80	0.763	NBS: ISConc=-1; Initial: LimitLow=0, LimitHigh=10; Retest: LimitLow=0.04, LimitHigh=10; Recall: LimitLow=0.04, LimitHigh=10; Recall retest: LimitLow=0.04, LimitHigh=10	Peak Area	5	0	10
HIE with sampling at different times (A)	HIE-6h	ESI1	1	C4	sample0008_133506	8000086434	Initial	MRM+	232.20/85.00	Qualifier	C4 IS	0	0.05	13613	426	0	0	394641	10496	Savitzky-Golay,7,2	0.13/0.80	0.587	NBS: ISConc=1.45; Initial: LimitLow=0, LimitHigh=1.5; Retest: LimitLow=0, LimitHigh=1.5; Recall: LimitLow=0, LimitHigh=1.5; Recall retest: LimitLow=0, LimitHigh=1.5; LC: TargetConc=0.74, Stdev=0.1; HC: TargetConc=2.74, Stdev=0.33	Peak Area	0.75	0	1.5
HIE with sampling at different times (A)	HIE-6h	ESI1	1	C4 IS	sample0008_133506	8000086434	Initial	MRM+	235.20/85.00	IS		1.45	0	394641	10496	0	0	0	0	Savitzky-Golay,7,2	0.13/0.80	0.381	NBS: Internal Standard;	Peak Area	0	0	0
HIE with sampling at different times (A)	HIE-6h	ESI1	1	C4DC\C5OH	sample0008_133506	8000086434	Initial	MRM+	262.20/85.00	Qualifier	C5 IS	0	0.031	8870	285	0	0	441915	12651	Savitzky-Golay,7,2	0.13/0.80	0.176	NBS: ISConc=-1; Initial: LimitLow=0, LimitHigh=0.5; Retest: LimitLow=0, LimitHigh=0.5; Recall: LimitLow=0, LimitHigh=0.5; Recall retest: LimitLow=0, LimitHigh=0.5	Peak Area	0.25	0	0.5
HIE with sampling at different times (A)	HIE-6h	ESI1	1	C5	sample0008_133506	8000086434	Initial	MRM+	246.20/85.00	Qualifier	C5 IS	0	0.027	8305	296	0	0	441915	12651	Savitzky-Golay,7,2	0.13/0.80	0.147	NBS: ISConc=1.52; Initial: LimitLow=0, LimitHigh=0.56; Retest: LimitLow=0, LimitHigh=0.56; Recall: LimitLow=0, LimitHigh=0.56; Recall retest: LimitLow=0, LimitHigh=0.56; LC: TargetConc=0.63, Stdev=0.08; HC: TargetConc=2.46, Stdev=0.3	Peak Area	0.28	0	0.56
HIE with sampling at different times (A)	HIE-6h	ESI1	1	C5 IS	sample0008_133506	8000086434	Initial	MRM+	255.20/85.00	IS		1.52	0	441915	12651	0	0	0	0	Savitzky-Golay,7,2	0.13/0.80	0.763	NBS: Internal Standard;	Peak Area	0	0	0
HIE with sampling at different times (A)	HIE-6h	ESI1	1	C5:1	sample0008_133506	8000086434	Initial	MRM+	244.20/85.00	Qualifier	C5 IS	0	0.017	5044	201	0	0	441915	12651	Savitzky-Golay,7,2	0.13/0.80	0.528	NBS: ISConc=-1; Initial: LimitLow=0, LimitHigh=0.15; Retest: LimitLow=0, LimitHigh=0.15; Recall: LimitLow=0, LimitHigh=0.15; Recall retest: LimitLow=0, LimitHigh=0.15	Peak Area	0.075	0	0.15
HIE with sampling at different times (A)	HIE-6h	ESI1	1	C5DC\C6OH	sample0008_133506	8000086434	Initial	MRM+	276.20/85.00	Qualifier	C5DC\C6OH IS	0	0.017	1943	120	0	0	166992	4859	Savitzky-Golay,7,2	0.13/0.80	0.352	NBS: ISConc=1.49; Initial: LimitLow=0, LimitHigh=0.3; Retest: LimitLow=0, LimitHigh=0.3; Recall: LimitLow=0, LimitHigh=0.3; Recall retest: LimitLow=0, LimitHigh=0.3; LC: TargetConc=0.39, Stdev=0.09; HC: TargetConc=1.98, Stdev=0.24	Peak Area	0.15	0	0.3
HIE with sampling at different times (A)	HIE-6h	ESI1	1	C5DC\C6OH IS	sample0008_133506	8000086434	Initial	MRM+	282.20/85.00	IS		1.49	0	166992	4859	0	0	0	0	Savitzky-Golay,7,2	0.13/0.80	0.763	NBS: Internal Standard;	Peak Area	0	0	0
HIE with sampling at different times (A)	HIE-6h	ESI1	1	C6	sample0008_133506	8000086434	Initial	MRM+	260.20/85.00	Qualifier	C6 IS	0	0.005	1513	102	0	0	350187	9503	Savitzky-Golay,7,2	0.13/0.80	0.557	NBS: ISConc=1.03; Initial: LimitLow=0, LimitHigh=0.2; Retest: LimitLow=0, LimitHigh=0.2; Recall: LimitLow=0, LimitHigh=0.2; Recall retest: LimitLow=0, LimitHigh=0.2; LC: TargetConc=0.29, Stdev=0.09; HC: TargetConc=1.4, Stdev=0.17	Peak Area	0.1	0	0.2
HIE with sampling at different times (A)	HIE-6h	ESI1	1	C6 IS	sample0008_133506	8000086434	Initial	MRM+	263.20/85.00	IS		1.03	0	350187	9503	0	0	0	0	Savitzky-Golay,7,2	0.13/0.80	0.616	NBS: Internal Standard;	Peak Area	0	0	0
HIE with sampling at different times (A)	HIE-6h	ESI1	1	C6DC	sample0008_133506	8000086434	Initial	MRM+	290.20/85.00	Qualifier	C5DC\C6OH IS	0	0.027	3055	166	0	0	166992	4859	Savitzky-Golay,7,2	0.13/0.80	0.147	NBS: ISConc=-1;	Peak Area	0	0	0
HIE with sampling at different times (A)	HIE-6h	ESI1	1	C8	sample0008_133506	8000086434	Initial	MRM+	288.20/85.00	Qualifier	C8 IS	0	0.045	12784	493	0	0	298108	9354	Savitzky-Golay,7,2	0.13/0.80	0.469	NBS: ISConc=1.04; Initial: LimitLow=0, LimitHigh=0.4; Retest: LimitLow=0, LimitHigh=0.4; Recall: LimitLow=0, LimitHigh=0.4; Recall retest: LimitLow=0, LimitHigh=0.4; LC: TargetConc=0.55, Stdev=0.08; HC: TargetConc=2.76, Stdev=0.33	Peak Area	0.2	0	0.4
HIE with sampling at different times (A)	HIE-6h	ESI1	1	C8 IS	sample0008_133506	8000086434	Initial	MRM+	291.20/85.00	IS		1.04	0	298108	9354	0	0	0	0	Savitzky-Golay,7,2	0.13/0.80	0.147	NBS: Internal Standard;	Peak Area	0	0	0
HIE with sampling at different times (A)	HIE-6h	ESI1	1	C8:1	sample0008_133506	8000086434	Initial	MRM+	286.20/85.00	Qualifier	C8 IS	0	0.015	4199	195	0	0	298108	9354	Savitzky-Golay,7,2	0.13/0.80	0.176	NBS: ISConc=-1;	Peak Area	0	0	0
HIE with sampling at different times (A)	HIE-6h	ESI1	1	C10	sample0008_133506	8000086434	Initial	MRM+	316.20/85.00	Qualifier	C10 IS	0	0.081	25230	806	0	0	339416	9826	Savitzky-Golay,7,2	0.13/0.80	0.235	NBS: ISConc=0.91; Initial: LimitLow=0, LimitHigh=0.29; Retest: LimitLow=0, LimitHigh=0.29; Recall: LimitLow=0, LimitHigh=0.29; Recall retest: LimitLow=0, LimitHigh=0.29; LC: TargetConc=0.31, Stdev=0.09; HC: TargetConc=2.02, Stdev=0.24	Peak Area	0.145	0	0.29
HIE with sampling at different times (A)	HIE-6h	ESI1	1	C10 IS	sample0008_133506	8000086434	Initial	MRM+	319.30/85.00	IS		0.91	0	339416	9826	0	0	0	0	Savitzky-Golay,7,2	0.13/0.80	0.176	NBS: Internal Standard;	Peak Area	0	0	0
HIE with sampling at different times (A)	HIE-6h	ESI1	1	C10:1	sample0008_133506	8000086434	Initial	MRM+	314.20/85.00	Qualifier	C10 IS	0	0.012	4539	206	0	0	339416	9826	Savitzky-Golay,7,2	0.13/0.80	0.381	NBS: ISConc=-1; Initial: LimitLow=0, LimitHigh=0.3; Retest: LimitLow=0, LimitHigh=0.3; Recall: LimitLow=0, LimitHigh=0.3; Recall retest: LimitLow=0, LimitHigh=0.3	Peak Area	0.15	0	0.3
HIE with sampling at different times (A)	HIE-6h	ESI1	1	C10:2	sample0008_133506	8000086434	Initial	MRM+	312.20/85.00	Qualifier	C10 IS	0	0.002	687	43	0	0	339416	9826	Savitzky-Golay,7,2	0.13/0.80	0.235	NBS: ISConc=-1; Initial: LimitLow=0, LimitHigh=100; Retest: LimitLow=0, LimitHigh=100; Recall: LimitLow=0, LimitHigh=100; Recall retest: LimitLow=0, LimitHigh=100	Peak Area	50	0	100
HIE with sampling at different times (A)	HIE-6h	ESI1	1	C12	sample0008_133506	8000086434	Initial	MRM+	344.30/85.00	Qualifier	C12 IS	0	0.118	48134	1389	0	0	423959	12213	Savitzky-Golay,7,2	0.13/0.80	0.528	NBS: ISConc=1; Initial: LimitLow=0, LimitHigh=0.33; Retest: LimitLow=0, LimitHigh=0.33; Recall: LimitLow=0, LimitHigh=0.33; Recall retest: LimitLow=0, LimitHigh=0.33; LC: TargetConc=0.28, Stdev=0.09; HC: TargetConc=1.36, Stdev=0.16	Peak Area	0.165	0	0.33
HIE with sampling at different times (A)	HIE-6h	ESI1	1	C12 IS	sample0008_133506	8000086434	Initial	MRM+	347.30/85.00	IS		1	0	423959	12213	0	0	0	0	Savitzky-Golay,7,2	0.13/0.80	0.205	NBS: Internal Standard;	Peak Area	0	0	0
HIE with sampling at different times (A)	HIE-6h	ESI1	1	C12:1	sample0008_133506	8000086434	Initial	MRM+	342.30/85.00	Qualifier	C12 IS	0	0.011	4595	179	0	0	423959	12213	Savitzky-Golay,7,2	0.13/0.80	0.528	NBS: ISConc=-1; Initial: LimitLow=0, LimitHigh=1000; Retest: LimitLow=0, LimitHigh=1000; Recall: LimitLow=0, LimitHigh=1000; Recall retest: LimitLow=0, LimitHigh=10000	Peak Area	500	0	1000
HIE with sampling at different times (A)	HIE-6h	ESI1	1	C14	sample0008_133506	8000086434	Initial	MRM+	372.30/85.00	Qualifier	C14 IS	0	0.276	140312	3969	0	0	555105	15099	Savitzky-Golay,7,2	0.13/0.80	0.499	NBS: ISConc=1.02; Initial: LimitLow=0, LimitHigh=0.59; Retest: LimitLow=0, LimitHigh=0.59; Recall: LimitLow=0, LimitHigh=0.59; Recall retest: LimitLow=0, LimitHigh=0.59; LC: TargetConc=0.33, Stdev=0.09; HC: TargetConc=1.9, Stdev=0.23	Peak Area	0.295	0	0.59
HIE with sampling at different times (A)	HIE-6h	ESI1	1	C14 IS	sample0008_133506	8000086434	Initial	MRM+	375.30/85.00	IS		1.02	0	555105	15099	0	0	0	0	Savitzky-Golay,7,2	0.13/0.80	0.205	NBS: Internal Standard;	Peak Area	0	0	0
HIE with sampling at different times (A)	HIE-6h	ESI1	1	C14:1	sample0008_133506	8000086434	Initial	MRM+	370.30/85.00	Qualifier	C14 IS	0	0.028	14990	520	0	0	555105	15099	Savitzky-Golay,7,2	0.13/0.80	0.293	NBS: ISConc=-1; Initial: LimitLow=0, LimitHigh=0.32; Retest: LimitLow=0, LimitHigh=0.32; Recall: LimitLow=0, LimitHigh=0.32; Recall retest: LimitLow=0, LimitHigh=0.32	Peak Area	0.16	0	0.32
HIE with sampling at different times (A)	HIE-6h	ESI1	1	C14:2	sample0008_133506	8000086434	Initial	MRM+	368.30/85.00	Qualifier	C14 IS	0	0.003	1793	94	0	0	555105	15099	Savitzky-Golay,7,2	0.13/0.80	0.205	NBS: ISConc=-1;	Peak Area	0	0	0
HIE with sampling at different times (A)	HIE-6h	ESI1	1	C14OH	sample0008_133506	8000086434	Initial	MRM+	388.30/85.00	Qualifier	C14 IS	0	0	0	0	0	0	555105	15099	Savitzky-Golay,7,2	0.13/0.80	0.763	NBS: ISConc=-1; Initial: LimitLow=0, LimitHigh=0.2; Retest: LimitLow=0, LimitHigh=0.2; Recall: LimitLow=0, LimitHigh=0.2; Recall retest: LimitLow=0, LimitHigh=0.2	Peak Area	0.1	0	0.2
HIE with sampling at different times (A)	HIE-6h	ESI1	1	C16	sample0008_133506	8000086434	Initial	MRM+	400.30/85.00	Qualifier	C16 IS	0	1.574	830708	23368	0	0	502475	13480	Savitzky-Golay,7,2	0.13/0.80	0.352	NBS: ISConc=0.89; Initial: LimitLow=0.3, LimitHigh=8.5; Retest: LimitLow=0.3, LimitHigh=8.5; Recall: LimitLow=0.3, LimitHigh=8.5; Recall retest: LimitLow=0.3, LimitHigh=8.5; LC: TargetConc=2.02, Stdev=0.24; HC: TargetConc=11.7, Stdev=1.4	Peak Area	4.4	0.3	8.5
HIE with sampling at different times (A)	HIE-6h	ESI1	1	C16 IS	sample0008_133506	8000086434	Initial	MRM+	403.40/85.00	IS		0.89	0	502475	13480	0	0	0	0	Savitzky-Golay,7,2	0.13/0.80	0.411	NBS: Internal Standard;	Peak Area	0	0	0
HIE with sampling at different times (A)	HIE-6h	ESI1	1	C16:1	sample0008_133506	8000086434	Initial	MRM+	398.30/85.00	Qualifier	C16 IS	0	0.043	24153	794	0	0	502475	13480	Savitzky-Golay,7,2	0.13/0.80	0.235	NBS: ISConc=-1;	Peak Area	0	0	0
HIE with sampling at different times (A)	HIE-6h	ESI1	1	C16OH	sample0008_133506	8000086434	Initial	MRM+	416.30/85.00	Qualifier	C16 IS	0	0.017	9795	358	0	0	502475	13480	Savitzky-Golay,7,2	0.13/0.80	0.147	NBS: ISConc=-1; Initial: LimitLow=0, LimitHigh=0.19; Retest: LimitLow=0, LimitHigh=0.19; Recall: LimitLow=0, LimitHigh=0.19; Recall retest: LimitLow=0, LimitHigh=0.19	Peak Area	0.095	0	0.19
HIE with sampling at different times (A)	HIE-6h	ESI1	1	C16:1OH\C17	sample0008_133506	8000086434	Initial	MRM+	414.30/85.00	Qualifier	C16 IS	0	0.054	30454	974	0	0	502475	13480	Savitzky-Golay,7,2	0.13/0.80	0.235	NBS: ISConc=-1; Initial: LimitLow=0, LimitHigh=0.22; Retest: LimitLow=0, LimitHigh=0.22; Recall: LimitLow=0, LimitHigh=0.22; Recall retest: LimitLow=0, LimitHigh=0.22	Peak Area	0.11	0	0.22
HIE with sampling at different times (A)	HIE-6h	ESI1	1	C18	sample0008_133506	8000086434	Initial	MRM+	428.40/85.00	Qualifier	C18 IS	0	0.552	299270	8213	0	0	603427	17127	Savitzky-Golay,7,2	0.13/0.80	0.704	NBS: ISConc=0.92; Initial: LimitLow=0.13, LimitHigh=2.5; Retest: LimitLow=0.13, LimitHigh=2.5; Recall: LimitLow=0.13, LimitHigh=2.5; Recall retest: LimitLow=0.13, LimitHigh=2.5; LC: TargetConc=1.14, Stdev=0.14; HC: TargetConc=4.32, Stdev=0.52	Peak Area	1.315	0.13	2.5
HIE with sampling at different times (A)	HIE-6h	ESI1	1	C18 IS	sample0008_133506	8000086434	Initial	MRM+	431.40/85.00	IS		0.92	0	603427	17127	0	0	0	0	Savitzky-Golay,7,2	0.13/0.80	0.352	NBS: Internal Standard;	Peak Area	0	0	0
HIE with sampling at different times (A)	HIE-6h	ESI1	1	C18:1	sample0008_133506	8000086434	Initial	MRM+	426.40/85.00	Qualifier	C18 IS	0	0.545	357599	9438	0	0	603427	17127	Savitzky-Golay,7,2	0.13/0.80	0.44	NBS: ISConc=-1; Initial: LimitLow=0.15, LimitHigh=3.35; Retest: LimitLow=0.15, LimitHigh=3.35; Recall: LimitLow=0.15, LimitHigh=3.35; Recall retest: LimitLow=0.15, LimitHigh=3.35	Peak Area	1.75	0.15	3.35
HIE with sampling at different times (A)	HIE-6h	ESI1	1	C18:2	sample0008_133506	8000086434	Initial	MRM+	424.30/85.00	Qualifier	C18 IS	0	0.006	3740	189	0	0	603427	17127	Savitzky-Golay,7,2	0.13/0.80	0.264	NBS: ISConc=-1;	Peak Area	0	0	0
HIE with sampling at different times (A)	HIE-6h	ESI1	1	C18OH	sample0008_133506	8000086434	Initial	MRM+	444.40/85.00	Qualifier	C18 IS	0	0.018	11669	488	0	0	603427	17127	Savitzky-Golay,7,2	0.13/0.80	0.616	NBS: ISConc=-1; Initial: LimitLow=0, LimitHigh=0.14; Retest: LimitLow=0, LimitHigh=0.14; Recall: LimitLow=0, LimitHigh=0.14; Recall retest: LimitLow=0, LimitHigh=0.14	Peak Area	0.07	0	0.14
HIE with sampling at different times (A)	HIE-6h	ESI1	1	C18:1OH	sample0008_133506	8000086434	Initial	MRM+	442.40/85.00	Qualifier	C18 IS	0	0.036	23498	786	0	0	603427	17127	Savitzky-Golay,7,2	0.13/0.80	0.704	NBS: ISConc=-1; Initial: LimitLow=0, LimitHigh=0.16; Retest: LimitLow=0, LimitHigh=0.16; Recall: LimitLow=0, LimitHigh=0.16; Recall retest: LimitLow=0, LimitHigh=0.16	Peak Area	0.08	0	0.16
HIE with sampling at different times (A)	HIE-6h	ESI1	1	C18:2OH	sample0008_133506	8000086434	Initial	MRM+	440.30/85.00	Qualifier	C18 IS	0	0.038	25028	1013	0	0	603427	17127	Savitzky-Golay,7,2	0.13/0.80	0.469	NBS: ISConc=-1;	Peak Area	0	0	0
HIE with sampling at different times (A)	HIE-6h	ESI1	1	C20	sample0008_133506	8000086434	Initial	MRM+	456.40/85.00	Qualifier	C26 IS	0	0.028	21769	641	0	0	852350	24573	Savitzky-Golay,7,2	0.13/0.80	0.733	NBS: ISConc=-1;	Peak Area	0	0	0
HIE with sampling at different times (A)	HIE-6h	ESI1	1	C22	sample0008_133506	8000086434	Initial	MRM+	484.40/85.00	Qualifier	C26 IS	0	0.01	7848	314	0	0	852350	24573	Savitzky-Golay,7,2	0.13/0.80	0.205	NBS: ISConc=-1;	Peak Area	0	0	0
HIE with sampling at different times (A)	HIE-6h	ESI1	1	C24	sample0008_133506	8000086434	Initial	MRM+	512.50/85.00	Qualifier	C26 IS	0	0.031	23858	794	0	0	852350	24573	Savitzky-Golay,7,2	0.13/0.80	0.381	NBS: ISConc=-1;	Peak Area	0	0	0
HIE with sampling at different times (A)	HIE-6h	ESI1	1	C26	sample0008_133506	8000086434	Initial	MRM+	540.50/85.00	Qualifier	C26 IS	0	0.007	5320	310	0	0	852350	24573	Savitzky-Golay,7,2	0.13/0.80	0.587	NBS: ISConc=1.09; LC: TargetConc=0.61, Stdev=0.09; HC: TargetConc=1.66, Stdev=0.2	Peak Area	0	0	0
HIE with sampling at different times (A)	HIE-6h	ESI1	1	C26 IS	sample0008_133506	8000086434	Initial	MRM+	543.50/85.00	IS		1.09	0	852350	24573	0	0	0	0	Savitzky-Golay,7,2	0.13/0.80	0.44	NBS: Internal Standard;	Peak Area	0	0	0
HIE with sampling at different times (A)	HIE-6h	ESI1	1	SA	sample0008_133506	8000086434	Initial	MRM+	155.10/109.10	Qualifier	SA IS	0	0.373	11442	581	0	0	1781087	46528	Savitzky-Golay,7,2	0.13/0.80	0.176	NBS: ISConc=58.1; Initial: LimitLow=0, LimitHigh=2; Retest: LimitLow=0, LimitHigh=2; Recall: LimitLow=0, LimitHigh=2; Recall retest: LimitLow=0, LimitHigh=2; LC: TargetConc=2.57, Stdev=0.38; HC: TargetConc=10.4, Stdev=1.2	Peak Area	1	0	2
HIE with sampling at different times (A)	HIE-6h	ESI1	1	SA IS	sample0008_133506	8000086434	Initial	MRM+	160.10/114.10	IS		58.1	0	1781087	46528	0	0	0	0	Savitzky-Golay,7,2	0.13/0.80	0.44	NBS: Internal Standard;	Peak Area	0	0	0
HIE with sampling at different times (A)	HIE-6h	ESI1	1	ADO	sample0008_133506	8000086434	Initial	MRM+	268.10/136.10	Qualifier	ADO IS	0	0.057	4598	172	0	0	529709	14819	Savitzky-Golay,7,2	0.13/0.80	0.205	NBS: ISConc=9.44; LC: TargetConc=2.51, Stdev=0.34; HC: TargetConc=6.91, Stdev=0.83	Peak Area	0	0	0
HIE with sampling at different times (A)	HIE-6h	ESI1	1	ADO IS	sample0008_133506	8000086434	Initial	MRM+	273.10/136.10	IS		9.44	0	529709	14819	0	0	0	0	Savitzky-Golay,7,2	0.13/0.80	0.381	NBS: Internal Standard;	Peak Area	0	0	0
HIE with sampling at different times (A)	HIE-6h	ESI1	1	D-ADO	sample0008_133506	8000086434	Initial	MRM+	252.10/136.10	Qualifier	D-ADO IS	0	0.032	2255	135	0	0	682407	18580	Savitzky-Golay,7,2	0.13/0.80	0.176	NBS: ISConc=9.82;	Peak Area	0	0	0
HIE with sampling at different times (A)	HIE-6h	ESI1	1	D-ADO IS	sample0008_133506	8000086434	Initial	MRM+	257.10/136.10	IS		9.82	0	682407	18580	0	0	0	0	Savitzky-Golay,7,2	0.13/0.80	0.176	NBS: Internal Standard;	Peak Area	0	0	0
HIE with sampling at different times (A)	HIE-6h	ESI1	1	C20:0-LPC	sample0008_133506	8000086434	Initial	MRM+	552.40/104.10	Qualifier	C26:0-LPC IS	0	2.113	144180	4253	0	0	300288	8458	Savitzky-Golay,7,2	0.13/0.80	0.176	NBS: ISConc=-1;	Peak Area	0	0	0
HIE with sampling at different times (A)	HIE-6h	ESI1	1	C22:0-LPC	sample0008_133506	8000086434	Initial	MRM+	580.40/104.10	Qualifier	C26:0-LPC IS	0	1.032	70444	2086	0	0	300288	8458	Savitzky-Golay,7,2	0.13/0.80	0.264	NBS: ISConc=-1;	Peak Area	0	0	0
HIE with sampling at different times (A)	HIE-6h	ESI1	1	C24:0-LPC	sample0008_133506	8000086434	Initial	MRM+	608.50/104.10	Qualifier	C26:0-LPC IS	0	1.813	123729	3495	0	0	300288	8458	Savitzky-Golay,7,2	0.13/0.80	0.499	NBS: ISConc=-1;	Peak Area	0	0	0
HIE with sampling at different times (A)	HIE-6h	ESI1	1	C26:0-LPC	sample0008_133506	8000086434	Initial	MRM+	636.50/104.10	Qualifier	C26:0-LPC IS	0	0.396	30026	1060	0	0	300288	8458	Savitzky-Golay,7,2	0.13/0.80	0.704	NBS: ISConc=4.4; LC: TargetConc=0.92, Stdev=0.11; HC: TargetConc=3.04, Stdev=0.36	Peak Area	0	0	0
HIE with sampling at different times (A)	HIE-6h	ESI1	1	C26:0-LPC IS	sample0008_133506	8000086434	Initial	MRM+	640.50/104.10	IS		4.4	0	300288	8458	0	0	0	0	Savitzky-Golay,7,2	0.13/0.80	0.704	NBS: Internal Standard;	Peak Area	0	0	0
HIE with sampling at different times (A)	HIE-6h	ESI1	1	ASA	sample0008_133506	8000086434	Initial	MRM+	291.10/70.10	Qualifier	Arg IS	0	0.638	16395	584	0	0	1217238	33871	Savitzky-Golay,7,2	0.13/0.80	0.205	NBS: --	Peak Area	0	0	0
HIE with sampling at different times (A)	HIE-6h	ESI1	1	ASA anhydride I + II	sample0008_133506	8000086434	Initial	MRM+	273.10/70.10	Qualifier	Arg IS	0	0.234	6009	237	0	0	1217238	33871	Savitzky-Golay,7,2	0.13/0.80	0.205	NBS: --	Peak Area	0	0	0
HIE with sampling at different times (A)	HIE-6h			ASATotal	sample0008_133506	8000086434	Initial	N/A	0.00/0.00	Qualifier	Arg IS	0	0.881	22404	821	0	0	1217238	33871	Savitzky-Golay,7,2	0.13/0.80	0	NBS: ISConc=-1; Initial: LimitLow=0, LimitHigh=1.5; Retest: LimitLow=0, LimitHigh=1.5; Recall: LimitLow=0, LimitHigh=1.5; Recall retest: LimitLow=0, LimitHigh=1.5; LC: TargetConc=2.22, Stdev=0.38; HC: TargetConc=39, Stdev=4.7	Peak Area	0.75	0	1.5
HIE with sampling at different times (A)	HIE-6h	ESI1	1	Ala	sample0010_133834	8000086435	Initial	MRM+	90.10/44.00	Qualifier	Ala IS	0	449.303	1000470	30759	0	0	304726	9448	Savitzky-Golay,7,2	0.13/0.80	0.176	NBS: ISConc=115; Initial: LimitLow=0, LimitHigh=10000; Retest: LimitLow=0, LimitHigh=10000; Recall: LimitLow=0, LimitHigh=10000; Recall retest: LimitLow=0, LimitHigh=10000; LC: TargetConc=479, Stdev=57; HC: TargetConc=967, Stdev=116	Peak Area	5000	0	10000
HIE with sampling at different times (A)	HIE-6h	ESI1	1	Ala IS	sample0010_133834	8000086435	Initial	MRM+	93.10/47.10	IS		115	0	304726	9448	0	0	0	0	Savitzky-Golay,7,2	0.13/0.80	0.205	NBS: Internal Standard;	Peak Area	0	0	0
HIE with sampling at different times (A)	HIE-6h	ESI1	1	Arg	sample0010_133834	8000086435	Initial	MRM+	175.10/70.10	Qualifier	Arg IS	0	128.798	2982839	81061	0	0	1108714	29390	Savitzky-Golay,7,2	0.13/0.80	0.411	NBS: ISConc=47.4; Initial: LimitLow=0, LimitHigh=70; Retest: LimitLow=0, LimitHigh=70; Recall: LimitLow=0, LimitHigh=70; Recall retest: LimitLow=0, LimitHigh=70; LC: TargetConc=24.2, Stdev=2.9; HC: TargetConc=136, Stdev=16	Peak Area	35	0	70
HIE with sampling at different times (A)	HIE-6h	ESI1	1	Arg IS	sample0010_133834	8000086435	Initial	MRM+	180.10/75.10	IS		47.4	0	1108714	29390	0	0	0	0	Savitzky-Golay,7,2	0.13/0.80	0.205	NBS: Internal Standard;	Peak Area	0	0	0
HIE with sampling at different times (A)	HIE-6h	ESI1	1	Cit	sample0010_133834	8000086435	Initial	MRM+	176.10/113.10	Qualifier	Cit IS	0	40.794	156776	4674	0	0	355231	10251	Savitzky-Golay,7,2	0.13/0.80	0.176	NBS: ISConc=81.8; Initial: LimitLow=0, LimitHigh=80; Retest: LimitLow=0, LimitHigh=80; Recall: LimitLow=0, LimitHigh=80; Recall retest: LimitLow=0, LimitHigh=80; LC: TargetConc=33.1, Stdev=4; HC: TargetConc=147, Stdev=18	Peak Area	40	0	80
HIE with sampling at different times (A)	HIE-6h	ESI1	1	Cit IS	sample0010_133834	8000086435	Initial	MRM+	178.10/115.10	IS		81.8	0	355231	10251	0	0	0	0	Savitzky-Golay,7,2	0.13/0.80	0.352	NBS: Internal Standard;	Peak Area	0	0	0
HIE with sampling at different times (A)	HIE-6h	ESI1	1	Gln\Lys	sample0010_133834	8000086435	Initial	MRM+	147.10/84.00	Qualifier	Gln\Lys IS	0	147.067	1046794	29389	0	0	636120	17563	Savitzky-Golay,7,2	0.13/0.80	0.176	NBS: ISConc=99.3; LC: TargetConc=635, Stdev=76; HC: TargetConc=1350, Stdev=160	Peak Area	0	0	0
HIE with sampling at different times (A)	HIE-6h	ESI1	1	Gln\Lys IS	sample0010_133834	8000086435	Initial	MRM+	152.10/88.10	IS		99.3	0	636120	17563	0	0	0	0	Savitzky-Golay,7,2	0.13/0.80	0.44	NBS: Internal Standard;	Peak Area	0	0	0
HIE with sampling at different times (A)	HIE-6h	ESI1	1	Glu	sample0010_133834	8000086435	Initial	MRM+	148.10/84.00	Qualifier	Gln\Lys IS	0	103.471	662842	17905	0	0	636120	17563	Savitzky-Golay,7,2	0.13/0.80	0.205	NBS: ISConc=-1;	Peak Area	0	0	0
HIE with sampling at different times (A)	HIE-6h	ESI1	1	Gly	sample0010_133834	8000086435	Initial	MRM+	76.00/30.00	Qualifier	Gly IS	0	327.032	249884	7130	0	0	456349	13154	Savitzky-Golay,7,2	0.13/0.80	0.205	NBS: ISConc=553; LC: TargetConc=549, Stdev=66; HC: TargetConc=1320, Stdev=160	Peak Area	0	0	0
HIE with sampling at different times (A)	HIE-6h	ESI1	1	Gly IS	sample0010_133834	8000086435	Initial	MRM+	78.00/32.00	IS		553	0	456349	13154	0	0	0	0	Savitzky-Golay,7,2	0.13/0.80	0.205	NBS: Internal Standard;	Peak Area	0	0	0
HIE with sampling at different times (A)	HIE-6h	ESI1	1	Leu\Ile\Pro-OH	sample0010_133834	8000086435	Initial	MRM+	132.10/86.10	Qualifier	Leu\Ile\Pro-OH IS	0	235.368	6491537	199410	0	0	2813472	85688	Savitzky-Golay,7,2	0.13/0.80	0.176	NBS: ISConc=101; Initial: LimitLow=0, LimitHigh=380; Retest: LimitLow=0, LimitHigh=380; Recall: LimitLow=0, LimitHigh=380; Recall retest: LimitLow=0, LimitHigh=380; LC: TargetConc=183, Stdev=22; HC: TargetConc=772, Stdev=93	Peak Area	190	0	380
HIE with sampling at different times (A)	HIE-6h	ESI1	1	Leu\Ile\Pro-OH IS	sample0010_133834	8000086435	Initial	MRM+	135.10/89.10	IS		101	0	2813472	85688	0	0	0	0	Savitzky-Golay,7,2	0.13/0.80	0.176	NBS: Internal Standard;	Peak Area	0	0	0
HIE with sampling at different times (A)	HIE-6h	ESI1	1	Met	sample0010_133834	8000086435	Initial	MRM+	150.10/104.10	Qualifier	Met IS	0	13.052	70640	2386	0	0	625935	17585	Savitzky-Golay,7,2	0.13/0.80	0.205	NBS: ISConc=99.7; Initial: LimitLow=7, LimitHigh=80; Retest: LimitLow=7, LimitHigh=80; Recall: LimitLow=7, LimitHigh=80; Recall retest: LimitLow=7, LimitHigh=80; LC: TargetConc=36, Stdev=4.3; HC: TargetConc=177, Stdev=21	Peak Area	43.5	7	80
HIE with sampling at different times (A)	HIE-6h	ESI1	1	Met IS	sample0010_133834	8000086435	Initial	MRM+	153.10/107.10	IS		99.7	0	625935	17585	0	0	0	0	Savitzky-Golay,7,2	0.13/0.80	0.205	NBS: Internal Standard;	Peak Area	0	0	0
HIE with sampling at different times (A)	HIE-6h	ESI1	1	Orn	sample0010_133834	8000086435	Initial	MRM+	133.10/70.10	Qualifier	Orn IS	0	13.724	100207	3650	0	0	795889	24693	Savitzky-Golay,7,2	0.13/0.80	0.176	NBS: ISConc=109; LC: TargetConc=154, Stdev=18; HC: TargetConc=488, Stdev=59	Peak Area	0	0	0
HIE with sampling at different times (A)	HIE-6h	ESI1	1	Orn IS	sample0010_133834	8000086435	Initial	MRM+	139.10/76.10	IS		109	0	795889	24693	0	0	0	0	Savitzky-Golay,7,2	0.13/0.80	0.205	NBS: Internal Standard;	Peak Area	0	0	0
HIE with sampling at different times (A)	HIE-6h	ESI1	1	Phe	sample0010_133834	8000086435	Initial	MRM+	166.10/120.10	Qualifier	Phe IS	0	65.946	2724313	79042	0	0	3203441	94158	Savitzky-Golay,7,2	0.13/0.80	0.205	NBS: ISConc=71.8; Initial: LimitLow=0, LimitHigh=120; Retest: LimitLow=0, LimitHigh=120; Recall: LimitLow=0, LimitHigh=120; Recall retest: LimitLow=0, LimitHigh=120; LC: TargetConc=79.4, Stdev=9.5; HC: TargetConc=264, Stdev=32	Peak Area	60	0	120
HIE with sampling at different times (A)	HIE-6h	ESI1	1	Phe IS	sample0010_133834	8000086435	Initial	MRM+	172.10/126.10	IS		71.8	0	3203441	94158	0	0	0	0	Savitzky-Golay,7,2	0.13/0.80	0.205	NBS: Internal Standard;	Peak Area	0	0	0
HIE with sampling at different times (A)	HIE-6h	ESI1	1	Pro	sample0010_133834	8000086435	Initial	MRM+	116.10/70.10	Qualifier	Pro IS	0	100.632	2301379	70565	0	0	1791128	54149	Savitzky-Golay,7,2	0.13/0.80	0.205	NBS: ISConc=88; LC: TargetConc=235, Stdev=28; HC: TargetConc=683, Stdev=82	Peak Area	0	0	0
HIE with sampling at different times (A)	HIE-6h	ESI1	1	Pro IS	sample0010_133834	8000086435	Initial	MRM+	121.10/74.10	IS		88	0	1791128	54149	0	0	0	0	Savitzky-Golay,7,2	0.13/0.80	0.205	NBS: Internal Standard;	Peak Area	0	0	0
HIE with sampling at different times (A)	HIE-6h	ESI1	1	Tyr	sample0010_133834	8000086435	Initial	MRM+	182.10/136.10	Qualifier	Tyr IS	0	103.675	910929	26415	0	0	1241082	35961	Savitzky-Golay,7,2	0.13/0.80	0.205	NBS: ISConc=113; LC: TargetConc=136, Stdev=16; HC: TargetConc=549, Stdev=66	Peak Area	0	0	0
HIE with sampling at different times (A)	HIE-6h	ESI1	1	Tyr IS	sample0010_133834	8000086435	Initial	MRM+	188.10/142.10	IS		113	0	1241082	35961	0	0	0	0	Savitzky-Golay,7,2	0.13/0.80	0.205	NBS: Internal Standard;	Peak Area	0	0	0
HIE with sampling at different times (A)	HIE-6h	ESI1	1	Val	sample0010_133834	8000086435	Initial	MRM+	118.10/72.10	Qualifier	Val IS	0	149.498	2393781	78541	0	0	1936829	61680	Savitzky-Golay,7,2	0.13/0.80	0.205	NBS: ISConc=108; LC: TargetConc=213, Stdev=26; HC: TargetConc=470, Stdev=56	Peak Area	0	0	0
HIE with sampling at different times (A)	HIE-6h	ESI1	1	Val IS	sample0010_133834	8000086435	Initial	MRM+	124.10/77.10	IS		108	0	1936829	61680	0	0	0	0	Savitzky-Golay,7,2	0.13/0.80	0.176	NBS: Internal Standard;	Peak Area	0	0	0
HIE with sampling at different times (A)	HIE-6h	ESI1	1	C0	sample0010_133834	8000086435	Initial	MRM+	162.10/103.00	Qualifier	C0 IS	0	16.165	502399	15232	0	0	457486	13554	Savitzky-Golay,7,2	0.13/0.80	0.763	NBS: ISConc=11.5; Initial: LimitLow=8, LimitHigh=90; Retest: LimitLow=8, LimitHigh=90; Recall: LimitLow=8, LimitHigh=90; Recall retest: LimitLow=8, LimitHigh=90; LC: TargetConc=41, Stdev=4.9; HC: TargetConc=151, Stdev=18	Peak Area	49	8	90
HIE with sampling at different times (A)	HIE-6h	ESI1	1	C0 IS	sample0010_133834	8000086435	Initial	MRM+	171.20/103.00	IS		11.5	0	457486	13554	0	0	0	0	Savitzky-Golay,7,2	0.13/0.80	0.763	NBS: Internal Standard;	Peak Area	0	0	0
HIE with sampling at different times (A)	HIE-6h	ESI1	1	C2	sample0010_133834	8000086435	Initial	MRM+	204.10/85.00	Qualifier	C2 IS	0	4.712	872776	24006	0	0	973830	28417	Savitzky-Golay,7,2	0.13/0.80	0.469	NBS: ISConc=4.78; Initial: LimitLow=0, LimitHigh=115; Retest: LimitLow=0, LimitHigh=115; Recall: LimitLow=0, LimitHigh=115; Recall retest: LimitLow=0, LimitHigh=115; LC: TargetConc=27.6, Stdev=3.3; HC: TargetConc=82.4, Stdev=9.9	Peak Area	57.5	0	115
HIE with sampling at different times (A)	HIE-6h	ESI1	1	C2 IS	sample0010_133834	8000086435	Initial	MRM+	207.10/85.00	IS		4.78	0	973830	28417	0	0	0	0	Savitzky-Golay,7,2	0.13/0.80	0.763	NBS: Internal Standard;	Peak Area	0	0	0
HIE with sampling at different times (A)	HIE-6h	ESI1	1	C3	sample0010_133834	8000086435	Initial	MRM+	218.10/85.00	Qualifier	C3 IS	0	0.216	44997	1445	0	0	423677	11951	Savitzky-Golay,7,2	0.13/0.80	0.469	NBS: ISConc=2.03; Initial: LimitLow=0, LimitHigh=6.8; Retest: LimitLow=0, LimitHigh=6.8; Recall: LimitLow=0, LimitHigh=6.8; Recall retest: LimitLow=0, LimitHigh=6.8; LC: TargetConc=4.63, Stdev=0.56; HC: TargetConc=13.3, Stdev=1.6	Peak Area	3.4	0	6.8
HIE with sampling at different times (A)	HIE-6h	ESI1	1	C3 IS	sample0010_133834	8000086435	Initial	MRM+	221.20/85.00	IS		2.03	0	423677	11951	0	0	0	0	Savitzky-Golay,7,2	0.13/0.80	0.44	NBS: Internal Standard;	Peak Area	0	0	0
HIE with sampling at different times (A)	HIE-6h	ESI1	1	C3DC\C4OH	sample0010_133834	8000086435	Initial	MRM+	248.10/85.00	Qualifier	C4 IS	0	0.147	36732	1114	0	0	361420	10598	Savitzky-Golay,7,2	0.13/0.80	0.293	NBS: ISConc=-1; Initial: LimitLow=0, LimitHigh=10; Retest: LimitLow=0.04, LimitHigh=10; Recall: LimitLow=0.04, LimitHigh=10; Recall retest: LimitLow=0.04, LimitHigh=10	Peak Area	5	0	10
HIE with sampling at different times (A)	HIE-6h	ESI1	1	C4	sample0010_133834	8000086435	Initial	MRM+	232.20/85.00	Qualifier	C4 IS	0	0.046	11571	455	0	0	361420	10598	Savitzky-Golay,7,2	0.13/0.80	0.528	NBS: ISConc=1.45; Initial: LimitLow=0, LimitHigh=1.5; Retest: LimitLow=0, LimitHigh=1.5; Recall: LimitLow=0, LimitHigh=1.5; Recall retest: LimitLow=0, LimitHigh=1.5; LC: TargetConc=0.74, Stdev=0.1; HC: TargetConc=2.74, Stdev=0.33	Peak Area	0.75	0	1.5
HIE with sampling at different times (A)	HIE-6h	ESI1	1	C4 IS	sample0010_133834	8000086435	Initial	MRM+	235.20/85.00	IS		1.45	0	361420	10598	0	0	0	0	Savitzky-Golay,7,2	0.13/0.80	0.528	NBS: Internal Standard;	Peak Area	0	0	0
HIE with sampling at different times (A)	HIE-6h	ESI1	1	C4DC\C5OH	sample0010_133834	8000086435	Initial	MRM+	262.20/85.00	Qualifier	C5 IS	0	0.037	10755	390	0	0	438336	11730	Savitzky-Golay,7,2	0.13/0.80	0.411	NBS: ISConc=-1; Initial: LimitLow=0, LimitHigh=0.5; Retest: LimitLow=0, LimitHigh=0.5; Recall: LimitLow=0, LimitHigh=0.5; Recall retest: LimitLow=0, LimitHigh=0.5	Peak Area	0.25	0	0.5
HIE with sampling at different times (A)	HIE-6h	ESI1	1	C5	sample0010_133834	8000086435	Initial	MRM+	246.20/85.00	Qualifier	C5 IS	0	0.037	11150	393	0	0	438336	11730	Savitzky-Golay,7,2	0.13/0.80	0.763	NBS: ISConc=1.52; Initial: LimitLow=0, LimitHigh=0.56; Retest: LimitLow=0, LimitHigh=0.56; Recall: LimitLow=0, LimitHigh=0.56; Recall retest: LimitLow=0, LimitHigh=0.56; LC: TargetConc=0.63, Stdev=0.08; HC: TargetConc=2.46, Stdev=0.3	Peak Area	0.28	0	0.56
HIE with sampling at different times (A)	HIE-6h	ESI1	1	C5 IS	sample0010_133834	8000086435	Initial	MRM+	255.20/85.00	IS		1.52	0	438336	11730	0	0	0	0	Savitzky-Golay,7,2	0.13/0.80	0.176	NBS: Internal Standard;	Peak Area	0	0	0
HIE with sampling at different times (A)	HIE-6h	ESI1	1	C5:1	sample0010_133834	8000086435	Initial	MRM+	244.20/85.00	Qualifier	C5 IS	0	0.021	6043	263	0	0	438336	11730	Savitzky-Golay,7,2	0.13/0.80	0.469	NBS: ISConc=-1; Initial: LimitLow=0, LimitHigh=0.15; Retest: LimitLow=0, LimitHigh=0.15; Recall: LimitLow=0, LimitHigh=0.15; Recall retest: LimitLow=0, LimitHigh=0.15	Peak Area	0.075	0	0.15
HIE with sampling at different times (A)	HIE-6h	ESI1	1	C5DC\C6OH	sample0010_133834	8000086435	Initial	MRM+	276.20/85.00	Qualifier	C5DC\C6OH IS	0	0.03	2847	157	0	0	141206	4674	Savitzky-Golay,7,2	0.13/0.80	0.616	NBS: ISConc=1.49; Initial: LimitLow=0, LimitHigh=0.3; Retest: LimitLow=0, LimitHigh=0.3; Recall: LimitLow=0, LimitHigh=0.3; Recall retest: LimitLow=0, LimitHigh=0.3; LC: TargetConc=0.39, Stdev=0.09; HC: TargetConc=1.98, Stdev=0.24	Peak Area	0.15	0	0.3
HIE with sampling at different times (A)	HIE-6h	ESI1	1	C5DC\C6OH IS	sample0010_133834	8000086435	Initial	MRM+	282.20/85.00	IS		1.49	0	141206	4674	0	0	0	0	Savitzky-Golay,7,2	0.13/0.80	0.763	NBS: Internal Standard;	Peak Area	0	0	0
HIE with sampling at different times (A)	HIE-6h	ESI1	1	C6	sample0010_133834	8000086435	Initial	MRM+	260.20/85.00	Qualifier	C6 IS	0	0.005	1460	67	0	0	343096	10581	Savitzky-Golay,7,2	0.13/0.80	0.616	NBS: ISConc=1.03; Initial: LimitLow=0, LimitHigh=0.2; Retest: LimitLow=0, LimitHigh=0.2; Recall: LimitLow=0, LimitHigh=0.2; Recall retest: LimitLow=0, LimitHigh=0.2; LC: TargetConc=0.29, Stdev=0.09; HC: TargetConc=1.4, Stdev=0.17	Peak Area	0.1	0	0.2
HIE with sampling at different times (A)	HIE-6h	ESI1	1	C6 IS	sample0010_133834	8000086435	Initial	MRM+	263.20/85.00	IS		1.03	0	343096	10581	0	0	0	0	Savitzky-Golay,7,2	0.13/0.80	0.147	NBS: Internal Standard;	Peak Area	0	0	0
HIE with sampling at different times (A)	HIE-6h	ESI1	1	C6DC	sample0010_133834	8000086435	Initial	MRM+	290.20/85.00	Qualifier	C5DC\C6OH IS	0	0.04	3782	205	0	0	141206	4674	Savitzky-Golay,7,2	0.13/0.80	0.469	NBS: ISConc=-1;	Peak Area	0	0	0
HIE with sampling at different times (A)	HIE-6h	ESI1	1	C8	sample0010_133834	8000086435	Initial	MRM+	288.20/85.00	Qualifier	C8 IS	0	0.097	26213	920	0	0	284042	9151	Savitzky-Golay,7,2	0.13/0.80	0.205	NBS: ISConc=1.04; Initial: LimitLow=0, LimitHigh=0.4; Retest: LimitLow=0, LimitHigh=0.4; Recall: LimitLow=0, LimitHigh=0.4; Recall retest: LimitLow=0, LimitHigh=0.4; LC: TargetConc=0.55, Stdev=0.08; HC: TargetConc=2.76, Stdev=0.33	Peak Area	0.2	0	0.4
HIE with sampling at different times (A)	HIE-6h	ESI1	1	C8 IS	sample0010_133834	8000086435	Initial	MRM+	291.20/85.00	IS		1.04	0	284042	9151	0	0	0	0	Savitzky-Golay,7,2	0.13/0.80	0.176	NBS: Internal Standard;	Peak Area	0	0	0
HIE with sampling at different times (A)	HIE-6h	ESI1	1	C8:1	sample0010_133834	8000086435	Initial	MRM+	286.20/85.00	Qualifier	C8 IS	0	0.01	2616	104	0	0	284042	9151	Savitzky-Golay,7,2	0.13/0.80	0.411	NBS: ISConc=-1;	Peak Area	0	0	0
HIE with sampling at different times (A)	HIE-6h	ESI1	1	C10	sample0010_133834	8000086435	Initial	MRM+	316.20/85.00	Qualifier	C10 IS	0	0.189	54931	2143	0	0	317347	9600	Savitzky-Golay,7,2	0.13/0.80	0.147	NBS: ISConc=0.91; Initial: LimitLow=0, LimitHigh=0.29; Retest: LimitLow=0, LimitHigh=0.29; Recall: LimitLow=0, LimitHigh=0.29; Recall retest: LimitLow=0, LimitHigh=0.29; LC: TargetConc=0.31, Stdev=0.09; HC: TargetConc=2.02, Stdev=0.24	Peak Area	0.145	0	0.29
HIE with sampling at different times (A)	HIE-6h	ESI1	1	C10 IS	sample0010_133834	8000086435	Initial	MRM+	319.30/85.00	IS		0.91	0	317347	9600	0	0	0	0	Savitzky-Golay,7,2	0.13/0.80	0.147	NBS: Internal Standard;	Peak Area	0	0	0
HIE with sampling at different times (A)	HIE-6h	ESI1	1	C10:1	sample0010_133834	8000086435	Initial	MRM+	314.20/85.00	Qualifier	C10 IS	0	0.021	7351	437	0	0	317347	9600	Savitzky-Golay,7,2	0.13/0.80	0.176	NBS: ISConc=-1; Initial: LimitLow=0, LimitHigh=0.3; Retest: LimitLow=0, LimitHigh=0.3; Recall: LimitLow=0, LimitHigh=0.3; Recall retest: LimitLow=0, LimitHigh=0.3	Peak Area	0.15	0	0.3
HIE with sampling at different times (A)	HIE-6h	ESI1	1	C10:2	sample0010_133834	8000086435	Initial	MRM+	312.20/85.00	Qualifier	C10 IS	0	0.007	2432	128	0	0	317347	9600	Savitzky-Golay,7,2	0.13/0.80	0.323	NBS: ISConc=-1; Initial: LimitLow=0, LimitHigh=100; Retest: LimitLow=0, LimitHigh=100; Recall: LimitLow=0, LimitHigh=100; Recall retest: LimitLow=0, LimitHigh=100	Peak Area	50	0	100
HIE with sampling at different times (A)	HIE-6h	ESI1	1	C12	sample0010_133834	8000086435	Initial	MRM+	344.30/85.00	Qualifier	C12 IS	0	0.245	95203	2872	0	0	404450	11541	Savitzky-Golay,7,2	0.13/0.80	0.528	NBS: ISConc=1; Initial: LimitLow=0, LimitHigh=0.33; Retest: LimitLow=0, LimitHigh=0.33; Recall: LimitLow=0, LimitHigh=0.33; Recall retest: LimitLow=0, LimitHigh=0.33; LC: TargetConc=0.28, Stdev=0.09; HC: TargetConc=1.36, Stdev=0.16	Peak Area	0.165	0	0.33
HIE with sampling at different times (A)	HIE-6h	ESI1	1	C12 IS	sample0010_133834	8000086435	Initial	MRM+	347.30/85.00	IS		1	0	404450	11541	0	0	0	0	Savitzky-Golay,7,2	0.13/0.80	0.176	NBS: Internal Standard;	Peak Area	0	0	0
HIE with sampling at different times (A)	HIE-6h	ESI1	1	C12:1	sample0010_133834	8000086435	Initial	MRM+	342.30/85.00	Qualifier	C12 IS	0	0.014	5763	254	0	0	404450	11541	Savitzky-Golay,7,2	0.13/0.80	0.176	NBS: ISConc=-1; Initial: LimitLow=0, LimitHigh=1000; Retest: LimitLow=0, LimitHigh=1000; Recall: LimitLow=0, LimitHigh=1000; Recall retest: LimitLow=0, LimitHigh=10000	Peak Area	500	0	1000
HIE with sampling at different times (A)	HIE-6h	ESI1	1	C14	sample0010_133834	8000086435	Initial	MRM+	372.30/85.00	Qualifier	C14 IS	0	0.358	176580	5357	0	0	538125	14956	Savitzky-Golay,7,2	0.13/0.80	0.205	NBS: ISConc=1.02; Initial: LimitLow=0, LimitHigh=0.59; Retest: LimitLow=0, LimitHigh=0.59; Recall: LimitLow=0, LimitHigh=0.59; Recall retest: LimitLow=0, LimitHigh=0.59; LC: TargetConc=0.33, Stdev=0.09; HC: TargetConc=1.9, Stdev=0.23	Peak Area	0.295	0	0.59
HIE with sampling at different times (A)	HIE-6h	ESI1	1	C14 IS	sample0010_133834	8000086435	Initial	MRM+	375.30/85.00	IS		1.02	0	538125	14956	0	0	0	0	Savitzky-Golay,7,2	0.13/0.80	0.176	NBS: Internal Standard;	Peak Area	0	0	0
HIE with sampling at different times (A)	HIE-6h	ESI1	1	C14:1	sample0010_133834	8000086435	Initial	MRM+	370.30/85.00	Qualifier	C14 IS	0	0.074	39194	1128	0	0	538125	14956	Savitzky-Golay,7,2	0.13/0.80	0.675	NBS: ISConc=-1; Initial: LimitLow=0, LimitHigh=0.32; Retest: LimitLow=0, LimitHigh=0.32; Recall: LimitLow=0, LimitHigh=0.32; Recall retest: LimitLow=0, LimitHigh=0.32	Peak Area	0.16	0	0.32
HIE with sampling at different times (A)	HIE-6h	ESI1	1	C14:2	sample0010_133834	8000086435	Initial	MRM+	368.30/85.00	Qualifier	C14 IS	0	0.005	2543	135	0	0	538125	14956	Savitzky-Golay,7,2	0.13/0.80	0.205	NBS: ISConc=-1;	Peak Area	0	0	0
HIE with sampling at different times (A)	HIE-6h	ESI1	1	C14OH	sample0010_133834	8000086435	Initial	MRM+	388.30/85.00	Qualifier	C14 IS	0	0	0	0	0	0	538125	14956	Savitzky-Golay,7,2	0.13/0.80	0.763	NBS: ISConc=-1; Initial: LimitLow=0, LimitHigh=0.2; Retest: LimitLow=0, LimitHigh=0.2; Recall: LimitLow=0, LimitHigh=0.2; Recall retest: LimitLow=0, LimitHigh=0.2	Peak Area	0.1	0	0.2
HIE with sampling at different times (A)	HIE-6h	ESI1	1	C16	sample0010_133834	8000086435	Initial	MRM+	400.30/85.00	Qualifier	C16 IS	0	1.853	917853	26944	0	0	471753	13408	Savitzky-Golay,7,2	0.13/0.80	0.176	NBS: ISConc=0.89; Initial: LimitLow=0.3, LimitHigh=8.5; Retest: LimitLow=0.3, LimitHigh=8.5; Recall: LimitLow=0.3, LimitHigh=8.5; Recall retest: LimitLow=0.3, LimitHigh=8.5; LC: TargetConc=2.02, Stdev=0.24; HC: TargetConc=11.7, Stdev=1.4	Peak Area	4.4	0.3	8.5
HIE with sampling at different times (A)	HIE-6h	ESI1	1	C16 IS	sample0010_133834	8000086435	Initial	MRM+	403.40/85.00	IS		0.89	0	471753	13408	0	0	0	0	Savitzky-Golay,7,2	0.13/0.80	0.147	NBS: Internal Standard;	Peak Area	0	0	0
HIE with sampling at different times (A)	HIE-6h	ESI1	1	C16:1	sample0010_133834	8000086435	Initial	MRM+	398.30/85.00	Qualifier	C16 IS	0	0.056	29434	1054	0	0	471753	13408	Savitzky-Golay,7,2	0.13/0.80	0.763	NBS: ISConc=-1;	Peak Area	0	0	0
HIE with sampling at different times (A)	HIE-6h	ESI1	1	C16OH	sample0010_133834	8000086435	Initial	MRM+	416.30/85.00	Qualifier	C16 IS	0	0.02	10620	380	0	0	471753	13408	Savitzky-Golay,7,2	0.13/0.80	0.616	NBS: ISConc=-1; Initial: LimitLow=0, LimitHigh=0.19; Retest: LimitLow=0, LimitHigh=0.19; Recall: LimitLow=0, LimitHigh=0.19; Recall retest: LimitLow=0, LimitHigh=0.19	Peak Area	0.095	0	0.19
HIE with sampling at different times (A)	HIE-6h	ESI1	1	C16:1OH\C17	sample0010_133834	8000086435	Initial	MRM+	414.30/85.00	Qualifier	C16 IS	0	0.067	35466	1092	0	0	471753	13408	Savitzky-Golay,7,2	0.13/0.80	0.733	NBS: ISConc=-1; Initial: LimitLow=0, LimitHigh=0.22; Retest: LimitLow=0, LimitHigh=0.22; Recall: LimitLow=0, LimitHigh=0.22; Recall retest: LimitLow=0, LimitHigh=0.22	Peak Area	0.11	0	0.22
HIE with sampling at different times (A)	HIE-6h	ESI1	1	C18	sample0010_133834	8000086435	Initial	MRM+	428.40/85.00	Qualifier	C18 IS	0	0.625	336355	9027	0	0	598727	16459	Savitzky-Golay,7,2	0.13/0.80	0.176	NBS: ISConc=0.92; Initial: LimitLow=0.13, LimitHigh=2.5; Retest: LimitLow=0.13, LimitHigh=2.5; Recall: LimitLow=0.13, LimitHigh=2.5; Recall retest: LimitLow=0.13, LimitHigh=2.5; LC: TargetConc=1.14, Stdev=0.14; HC: TargetConc=4.32, Stdev=0.52	Peak Area	1.315	0.13	2.5
HIE with sampling at different times (A)	HIE-6h	ESI1	1	C18 IS	sample0010_133834	8000086435	Initial	MRM+	431.40/85.00	IS		0.92	0	598727	16459	0	0	0	0	Savitzky-Golay,7,2	0.13/0.80	0.147	NBS: Internal Standard;	Peak Area	0	0	0
HIE with sampling at different times (A)	HIE-6h	ESI1	1	C18:1	sample0010_133834	8000086435	Initial	MRM+	426.40/85.00	Qualifier	C18 IS	0	0.714	464979	13738	0	0	598727	16459	Savitzky-Golay,7,2	0.13/0.80	0.176	NBS: ISConc=-1; Initial: LimitLow=0.15, LimitHigh=3.35; Retest: LimitLow=0.15, LimitHigh=3.35; Recall: LimitLow=0.15, LimitHigh=3.35; Recall retest: LimitLow=0.15, LimitHigh=3.35	Peak Area	1.75	0.15	3.35
HIE with sampling at different times (A)	HIE-6h	ESI1	1	C18:2	sample0010_133834	8000086435	Initial	MRM+	424.30/85.00	Qualifier	C18 IS	0	0.008	5036	214	0	0	598727	16459	Savitzky-Golay,7,2	0.13/0.80	0.44	NBS: ISConc=-1;	Peak Area	0	0	0
HIE with sampling at different times (A)	HIE-6h	ESI1	1	C18OH	sample0010_133834	8000086435	Initial	MRM+	444.40/85.00	Qualifier	C18 IS	0	0.017	10856	422	0	0	598727	16459	Savitzky-Golay,7,2	0.13/0.80	0.528	NBS: ISConc=-1; Initial: LimitLow=0, LimitHigh=0.14; Retest: LimitLow=0, LimitHigh=0.14; Recall: LimitLow=0, LimitHigh=0.14; Recall retest: LimitLow=0, LimitHigh=0.14	Peak Area	0.07	0	0.14
HIE with sampling at different times (A)	HIE-6h	ESI1	1	C18:1OH	sample0010_133834	8000086435	Initial	MRM+	442.40/85.00	Qualifier	C18 IS	0	0.043	27940	840	0	0	598727	16459	Savitzky-Golay,7,2	0.13/0.80	0.323	NBS: ISConc=-1; Initial: LimitLow=0, LimitHigh=0.16; Retest: LimitLow=0, LimitHigh=0.16; Recall: LimitLow=0, LimitHigh=0.16; Recall retest: LimitLow=0, LimitHigh=0.16	Peak Area	0.08	0	0.16
HIE with sampling at different times (A)	HIE-6h	ESI1	1	C18:2OH	sample0010_133834	8000086435	Initial	MRM+	440.30/85.00	Qualifier	C18 IS	0	0.051	33357	1023	0	0	598727	16459	Savitzky-Golay,7,2	0.13/0.80	0.147	NBS: ISConc=-1;	Peak Area	0	0	0
HIE with sampling at different times (A)	HIE-6h	ESI1	1	C20	sample0010_133834	8000086435	Initial	MRM+	456.40/85.00	Qualifier	C26 IS	0	0.03	24657	916	0	0	907983	23507	Savitzky-Golay,7,2	0.13/0.80	0.147	NBS: ISConc=-1;	Peak Area	0	0	0
HIE with sampling at different times (A)	HIE-6h	ESI1	1	C22	sample0010_133834	8000086435	Initial	MRM+	484.40/85.00	Qualifier	C26 IS	0	0.013	10817	360	0	0	907983	23507	Savitzky-Golay,7,2	0.13/0.80	0.176	NBS: ISConc=-1;	Peak Area	0	0	0
HIE with sampling at different times (A)	HIE-6h	ESI1	1	C24	sample0010_133834	8000086435	Initial	MRM+	512.50/85.00	Qualifier	C26 IS	0	0.036	30170	931	0	0	907983	23507	Savitzky-Golay,7,2	0.13/0.80	0.557	NBS: ISConc=-1;	Peak Area	0	0	0
HIE with sampling at different times (A)	HIE-6h	ESI1	1	C26	sample0010_133834	8000086435	Initial	MRM+	540.50/85.00	Qualifier	C26 IS	0	0.007	5079	168	0	0	907983	23507	Savitzky-Golay,7,2	0.13/0.80	0.264	NBS: ISConc=1.09; LC: TargetConc=0.61, Stdev=0.09; HC: TargetConc=1.66, Stdev=0.2	Peak Area	0	0	0
HIE with sampling at different times (A)	HIE-6h	ESI1	1	C26 IS	sample0010_133834	8000086435	Initial	MRM+	543.50/85.00	IS		1.09	0	907983	23507	0	0	0	0	Savitzky-Golay,7,2	0.13/0.80	0.733	NBS: Internal Standard;	Peak Area	0	0	0
HIE with sampling at different times (A)	HIE-6h	ESI1	1	SA	sample0010_133834	8000086435	Initial	MRM+	155.10/109.10	Qualifier	SA IS	0	0.381	11398	490	0	0	1738499	46879	Savitzky-Golay,7,2	0.13/0.80	0.176	NBS: ISConc=58.1; Initial: LimitLow=0, LimitHigh=2; Retest: LimitLow=0, LimitHigh=2; Recall: LimitLow=0, LimitHigh=2; Recall retest: LimitLow=0, LimitHigh=2; LC: TargetConc=2.57, Stdev=0.38; HC: TargetConc=10.4, Stdev=1.2	Peak Area	1	0	2
HIE with sampling at different times (A)	HIE-6h	ESI1	1	SA IS	sample0010_133834	8000086435	Initial	MRM+	160.10/114.10	IS		58.1	0	1738499	46879	0	0	0	0	Savitzky-Golay,7,2	0.13/0.80	0.205	NBS: Internal Standard;	Peak Area	0	0	0
HIE with sampling at different times (A)	HIE-6h	ESI1	1	ADO	sample0010_133834	8000086435	Initial	MRM+	268.10/136.10	Qualifier	ADO IS	0	0.137	11468	392	0	0	552778	17829	Savitzky-Golay,7,2	0.13/0.80	0.44	NBS: ISConc=9.44; LC: TargetConc=2.51, Stdev=0.34; HC: TargetConc=6.91, Stdev=0.83	Peak Area	0	0	0
HIE with sampling at different times (A)	HIE-6h	ESI1	1	ADO IS	sample0010_133834	8000086435	Initial	MRM+	273.10/136.10	IS		9.44	0	552778	17829	0	0	0	0	Savitzky-Golay,7,2	0.13/0.80	0.176	NBS: Internal Standard;	Peak Area	0	0	0
HIE with sampling at different times (A)	HIE-6h	ESI1	1	D-ADO	sample0010_133834	8000086435	Initial	MRM+	252.10/136.10	Qualifier	D-ADO IS	0	0.028	1865	85	0	0	659605	19603	Savitzky-Golay,7,2	0.13/0.80	0.44	NBS: ISConc=9.82;	Peak Area	0	0	0
HIE with sampling at different times (A)	HIE-6h	ESI1	1	D-ADO IS	sample0010_133834	8000086435	Initial	MRM+	257.10/136.10	IS		9.82	0	659605	19603	0	0	0	0	Savitzky-Golay,7,2	0.13/0.80	0.176	NBS: Internal Standard;	Peak Area	0	0	0
HIE with sampling at different times (A)	HIE-6h	ESI1	1	C20:0-LPC	sample0010_133834	8000086435	Initial	MRM+	552.40/104.10	Qualifier	C26:0-LPC IS	0	1.994	134979	3980	0	0	297808	7989	Savitzky-Golay,7,2	0.13/0.80	0.557	NBS: ISConc=-1;	Peak Area	0	0	0
HIE with sampling at different times (A)	HIE-6h	ESI1	1	C22:0-LPC	sample0010_133834	8000086435	Initial	MRM+	580.40/104.10	Qualifier	C26:0-LPC IS	0	1.088	73653	2525	0	0	297808	7989	Savitzky-Golay,7,2	0.13/0.80	0.323	NBS: ISConc=-1;	Peak Area	0	0	0
HIE with sampling at different times (A)	HIE-6h	ESI1	1	C24:0-LPC	sample0010_133834	8000086435	Initial	MRM+	608.50/104.10	Qualifier	C26:0-LPC IS	0	1.644	111244	3129	0	0	297808	7989	Savitzky-Golay,7,2	0.13/0.80	0.147	NBS: ISConc=-1;	Peak Area	0	0	0
HIE with sampling at different times (A)	HIE-6h	ESI1	1	C26:0-LPC	sample0010_133834	8000086435	Initial	MRM+	636.50/104.10	Qualifier	C26:0-LPC IS	0	0.388	29168	891	0	0	297808	7989	Savitzky-Golay,7,2	0.13/0.80	0.675	NBS: ISConc=4.4; LC: TargetConc=0.92, Stdev=0.11; HC: TargetConc=3.04, Stdev=0.36	Peak Area	0	0	0
HIE with sampling at different times (A)	HIE-6h	ESI1	1	C26:0-LPC IS	sample0010_133834	8000086435	Initial	MRM+	640.50/104.10	IS		4.4	0	297808	7989	0	0	0	0	Savitzky-Golay,7,2	0.13/0.80	0.528	NBS: Internal Standard;	Peak Area	0	0	0
HIE with sampling at different times (A)	HIE-6h	ESI1	1	ASA	sample0010_133834	8000086435	Initial	MRM+	291.10/70.10	Qualifier	Arg IS	0	1.39	32524	1164	0	0	1108714	29390	Savitzky-Golay,7,2	0.13/0.80	0.411	NBS: --	Peak Area	0	0	0
HIE with sampling at different times (A)	HIE-6h	ESI1	1	ASA anhydride I + II	sample0010_133834	8000086435	Initial	MRM+	273.10/70.10	Qualifier	Arg IS	0	0.425	9944	396	0	0	1108714	29390	Savitzky-Golay,7,2	0.13/0.80	0.528	NBS: --	Peak Area	0	0	0
HIE with sampling at different times (A)	HIE-6h			ASATotal	sample0010_133834	8000086435	Initial	N/A	0.00/0.00	Qualifier	Arg IS	0	1.834	42468	1560	0	0	1108714	29390	Savitzky-Golay,7,2	0.13/0.80	0	NBS: ISConc=-1; Initial: LimitLow=0, LimitHigh=1.5; Retest: LimitLow=0, LimitHigh=1.5; Recall: LimitLow=0, LimitHigh=1.5; Recall retest: LimitLow=0, LimitHigh=1.5; LC: TargetConc=2.22, Stdev=0.38; HC: TargetConc=39, Stdev=4.7	Peak Area	0.75	0	1.5
HIE with sampling at different times (A)	HIE-6h	ESI1	1	Ala	sample0011_134018	8000086436	Initial	MRM+	90.10/44.00	Qualifier	Ala IS	0	610.222	1268259	34694	0	0	284423	8862	Savitzky-Golay,7,2	0.13/0.80	0.176	NBS: ISConc=115; Initial: LimitLow=0, LimitHigh=10000; Retest: LimitLow=0, LimitHigh=10000; Recall: LimitLow=0, LimitHigh=10000; Recall retest: LimitLow=0, LimitHigh=10000; LC: TargetConc=479, Stdev=57; HC: TargetConc=967, Stdev=116	Peak Area	5000	0	10000
HIE with sampling at different times (A)	HIE-6h	ESI1	1	Ala IS	sample0011_134018	8000086436	Initial	MRM+	93.10/47.10	IS		115	0	284423	8862	0	0	0	0	Savitzky-Golay,7,2	0.13/0.80	0.176	NBS: Internal Standard;	Peak Area	0	0	0
HIE with sampling at different times (A)	HIE-6h	ESI1	1	Arg	sample0011_134018	8000086436	Initial	MRM+	175.10/70.10	Qualifier	Arg IS	0	184.446	4029769	111503	0	0	1045951	30078	Savitzky-Golay,7,2	0.13/0.80	0.205	NBS: ISConc=47.4; Initial: LimitLow=0, LimitHigh=70; Retest: LimitLow=0, LimitHigh=70; Recall: LimitLow=0, LimitHigh=70; Recall retest: LimitLow=0, LimitHigh=70; LC: TargetConc=24.2, Stdev=2.9; HC: TargetConc=136, Stdev=16	Peak Area	35	0	70
HIE with sampling at different times (A)	HIE-6h	ESI1	1	Arg IS	sample0011_134018	8000086436	Initial	MRM+	180.10/75.10	IS		47.4	0	1045951	30078	0	0	0	0	Savitzky-Golay,7,2	0.13/0.80	0.205	NBS: Internal Standard;	Peak Area	0	0	0
HIE with sampling at different times (A)	HIE-6h	ESI1	1	Cit	sample0011_134018	8000086436	Initial	MRM+	176.10/113.10	Qualifier	Cit IS	0	75.682	249928	6813	0	0	305247	8942	Savitzky-Golay,7,2	0.13/0.80	0.352	NBS: ISConc=81.8; Initial: LimitLow=0, LimitHigh=80; Retest: LimitLow=0, LimitHigh=80; Recall: LimitLow=0, LimitHigh=80; Recall retest: LimitLow=0, LimitHigh=80; LC: TargetConc=33.1, Stdev=4; HC: TargetConc=147, Stdev=18	Peak Area	40	0	80
HIE with sampling at different times (A)	HIE-6h	ESI1	1	Cit IS	sample0011_134018	8000086436	Initial	MRM+	178.10/115.10	IS		81.8	0	305247	8942	0	0	0	0	Savitzky-Golay,7,2	0.13/0.80	0.235	NBS: Internal Standard;	Peak Area	0	0	0
HIE with sampling at different times (A)	HIE-6h	ESI1	1	Gln\Lys	sample0011_134018	8000086436	Initial	MRM+	147.10/84.00	Qualifier	Gln\Lys IS	0	275.906	1758493	51669	0	0	569601	16448	Savitzky-Golay,7,2	0.13/0.80	0.176	NBS: ISConc=99.3; LC: TargetConc=635, Stdev=76; HC: TargetConc=1350, Stdev=160	Peak Area	0	0	0
HIE with sampling at different times (A)	HIE-6h	ESI1	1	Gln\Lys IS	sample0011_134018	8000086436	Initial	MRM+	152.10/88.10	IS		99.3	0	569601	16448	0	0	0	0	Savitzky-Golay,7,2	0.13/0.80	0.176	NBS: Internal Standard;	Peak Area	0	0	0
HIE with sampling at different times (A)	HIE-6h	ESI1	1	Glu	sample0011_134018	8000086436	Initial	MRM+	148.10/84.00	Qualifier	Gln\Lys IS	0	170.935	980509	27234	0	0	569601	16448	Savitzky-Golay,7,2	0.13/0.80	0.205	NBS: ISConc=-1;	Peak Area	0	0	0
HIE with sampling at different times (A)	HIE-6h	ESI1	1	Gly	sample0011_134018	8000086436	Initial	MRM+	76.00/30.00	Qualifier	Gly IS	0	443.943	314773	9892	0	0	423467	11813	Savitzky-Golay,7,2	0.13/0.80	0.176	NBS: ISConc=553; LC: TargetConc=549, Stdev=66; HC: TargetConc=1320, Stdev=160	Peak Area	0	0	0
HIE with sampling at different times (A)	HIE-6h	ESI1	1	Gly IS	sample0011_134018	8000086436	Initial	MRM+	78.00/32.00	IS		553	0	423467	11813	0	0	0	0	Savitzky-Golay,7,2	0.13/0.80	0.352	NBS: Internal Standard;	Peak Area	0	0	0
HIE with sampling at different times (A)	HIE-6h	ESI1	1	Leu\Ile\Pro-OH	sample0011_134018	8000086436	Initial	MRM+	132.10/86.10	Qualifier	Leu\Ile\Pro-OH IS	0	403.056	10927422	339990	0	0	2765635	81644	Savitzky-Golay,7,2	0.13/0.80	0.176	NBS: ISConc=101; Initial: LimitLow=0, LimitHigh=380; Retest: LimitLow=0, LimitHigh=380; Recall: LimitLow=0, LimitHigh=380; Recall retest: LimitLow=0, LimitHigh=380; LC: TargetConc=183, Stdev=22; HC: TargetConc=772, Stdev=93	Peak Area	190	0	380
HIE with sampling at different times (A)	HIE-6h	ESI1	1	Leu\Ile\Pro-OH IS	sample0011_134018	8000086436	Initial	MRM+	135.10/89.10	IS		101	0	2765635	81644	0	0	0	0	Savitzky-Golay,7,2	0.13/0.80	0.205	NBS: Internal Standard;	Peak Area	0	0	0
HIE with sampling at different times (A)	HIE-6h	ESI1	1	Met	sample0011_134018	8000086436	Initial	MRM+	150.10/104.10	Qualifier	Met IS	0	20.808	100005	3009	0	0	555842	17018	Savitzky-Golay,7,2	0.13/0.80	0.352	NBS: ISConc=99.7; Initial: LimitLow=7, LimitHigh=80; Retest: LimitLow=7, LimitHigh=80; Recall: LimitLow=7, LimitHigh=80; Recall retest: LimitLow=7, LimitHigh=80; LC: TargetConc=36, Stdev=4.3; HC: TargetConc=177, Stdev=21	Peak Area	43.5	7	80
HIE with sampling at different times (A)	HIE-6h	ESI1	1	Met IS	sample0011_134018	8000086436	Initial	MRM+	153.10/107.10	IS		99.7	0	555842	17018	0	0	0	0	Savitzky-Golay,7,2	0.13/0.80	0.205	NBS: Internal Standard;	Peak Area	0	0	0
HIE with sampling at different times (A)	HIE-6h	ESI1	1	Orn	sample0011_134018	8000086436	Initial	MRM+	133.10/70.10	Qualifier	Orn IS	0	49.185	307804	8848	0	0	682128	21601	Savitzky-Golay,7,2	0.13/0.80	0.176	NBS: ISConc=109; LC: TargetConc=154, Stdev=18; HC: TargetConc=488, Stdev=59	Peak Area	0	0	0
HIE with sampling at different times (A)	HIE-6h	ESI1	1	Orn IS	sample0011_134018	8000086436	Initial	MRM+	139.10/76.10	IS		109	0	682128	21601	0	0	0	0	Savitzky-Golay,7,2	0.13/0.80	0.176	NBS: Internal Standard;	Peak Area	0	0	0
HIE with sampling at different times (A)	HIE-6h	ESI1	1	Phe	sample0011_134018	8000086436	Initial	MRM+	166.10/120.10	Qualifier	Phe IS	0	66.842	2654871	75891	0	0	3079924	86265	Savitzky-Golay,7,2	0.13/0.80	0.176	NBS: ISConc=71.8; Initial: LimitLow=0, LimitHigh=120; Retest: LimitLow=0, LimitHigh=120; Recall: LimitLow=0, LimitHigh=120; Recall retest: LimitLow=0, LimitHigh=120; LC: TargetConc=79.4, Stdev=9.5; HC: TargetConc=264, Stdev=32	Peak Area	60	0	120
HIE with sampling at different times (A)	HIE-6h	ESI1	1	Phe IS	sample0011_134018	8000086436	Initial	MRM+	172.10/126.10	IS		71.8	0	3079924	86265	0	0	0	0	Savitzky-Golay,7,2	0.13/0.80	0.205	NBS: Internal Standard;	Peak Area	0	0	0
HIE with sampling at different times (A)	HIE-6h	ESI1	1	Pro	sample0011_134018	8000086436	Initial	MRM+	116.10/70.10	Qualifier	Pro IS	0	174.449	3812650	110941	0	0	1711709	47753	Savitzky-Golay,7,2	0.13/0.80	0.205	NBS: ISConc=88; LC: TargetConc=235, Stdev=28; HC: TargetConc=683, Stdev=82	Peak Area	0	0	0
HIE with sampling at different times (A)	HIE-6h	ESI1	1	Pro IS	sample0011_134018	8000086436	Initial	MRM+	121.10/74.10	IS		88	0	1711709	47753	0	0	0	0	Savitzky-Golay,7,2	0.13/0.80	0.205	NBS: Internal Standard;	Peak Area	0	0	0
HIE with sampling at different times (A)	HIE-6h	ESI1	1	Tyr	sample0011_134018	8000086436	Initial	MRM+	182.10/136.10	Qualifier	Tyr IS	0	190.149	1509225	43229	0	0	1121109	31724	Savitzky-Golay,7,2	0.13/0.80	0.176	NBS: ISConc=113; LC: TargetConc=136, Stdev=16; HC: TargetConc=549, Stdev=66	Peak Area	0	0	0
HIE with sampling at different times (A)	HIE-6h	ESI1	1	Tyr IS	sample0011_134018	8000086436	Initial	MRM+	188.10/142.10	IS		113	0	1121109	31724	0	0	0	0	Savitzky-Golay,7,2	0.13/0.80	0.205	NBS: Internal Standard;	Peak Area	0	0	0
HIE with sampling at different times (A)	HIE-6h	ESI1	1	Val	sample0011_134018	8000086436	Initial	MRM+	118.10/72.10	Qualifier	Val IS	0	276.006	4318883	129750	0	0	1892754	60749	Savitzky-Golay,7,2	0.13/0.80	0.176	NBS: ISConc=108; LC: TargetConc=213, Stdev=26; HC: TargetConc=470, Stdev=56	Peak Area	0	0	0
HIE with sampling at different times (A)	HIE-6h	ESI1	1	Val IS	sample0011_134018	8000086436	Initial	MRM+	124.10/77.10	IS		108	0	1892754	60749	0	0	0	0	Savitzky-Golay,7,2	0.13/0.80	0.176	NBS: Internal Standard;	Peak Area	0	0	0
HIE with sampling at different times (A)	HIE-6h	ESI1	1	C0	sample0011_134018	8000086436	Initial	MRM+	162.10/103.00	Qualifier	C0 IS	0	22.96	676362	18339	0	0	433634	11560	Savitzky-Golay,7,2	0.13/0.80	0.469	NBS: ISConc=11.5; Initial: LimitLow=8, LimitHigh=90; Retest: LimitLow=8, LimitHigh=90; Recall: LimitLow=8, LimitHigh=90; Recall retest: LimitLow=8, LimitHigh=90; LC: TargetConc=41, Stdev=4.9; HC: TargetConc=151, Stdev=18	Peak Area	49	8	90
HIE with sampling at different times (A)	HIE-6h	ESI1	1	C0 IS	sample0011_134018	8000086436	Initial	MRM+	171.20/103.00	IS		11.5	0	433634	11560	0	0	0	0	Savitzky-Golay,7,2	0.13/0.80	0.411	NBS: Internal Standard;	Peak Area	0	0	0
HIE with sampling at different times (A)	HIE-6h	ESI1	1	C2	sample0011_134018	8000086436	Initial	MRM+	204.10/85.00	Qualifier	C2 IS	0	6.084	1048885	29081	0	0	906532	25229	Savitzky-Golay,7,2	0.13/0.80	0.763	NBS: ISConc=4.78; Initial: LimitLow=0, LimitHigh=115; Retest: LimitLow=0, LimitHigh=115; Recall: LimitLow=0, LimitHigh=115; Recall retest: LimitLow=0, LimitHigh=115; LC: TargetConc=27.6, Stdev=3.3; HC: TargetConc=82.4, Stdev=9.9	Peak Area	57.5	0	115
HIE with sampling at different times (A)	HIE-6h	ESI1	1	C2 IS	sample0011_134018	8000086436	Initial	MRM+	207.10/85.00	IS		4.78	0	906532	25229	0	0	0	0	Savitzky-Golay,7,2	0.13/0.80	0.763	NBS: Internal Standard;	Peak Area	0	0	0
HIE with sampling at different times (A)	HIE-6h	ESI1	1	C3	sample0011_134018	8000086436	Initial	MRM+	218.10/85.00	Qualifier	C3 IS	0	0.334	68121	2011	0	0	414053	11279	Savitzky-Golay,7,2	0.13/0.80	0.763	NBS: ISConc=2.03; Initial: LimitLow=0, LimitHigh=6.8; Retest: LimitLow=0, LimitHigh=6.8; Recall: LimitLow=0, LimitHigh=6.8; Recall retest: LimitLow=0, LimitHigh=6.8; LC: TargetConc=4.63, Stdev=0.56; HC: TargetConc=13.3, Stdev=1.6	Peak Area	3.4	0	6.8
HIE with sampling at different times (A)	HIE-6h	ESI1	1	C3 IS	sample0011_134018	8000086436	Initial	MRM+	221.20/85.00	IS		2.03	0	414053	11279	0	0	0	0	Savitzky-Golay,7,2	0.13/0.80	0.44	NBS: Internal Standard;	Peak Area	0	0	0
HIE with sampling at different times (A)	HIE-6h	ESI1	1	C3DC\C4OH	sample0011_134018	8000086436	Initial	MRM+	248.10/85.00	Qualifier	C4 IS	0	0.187	47474	1504	0	0	368756	9795	Savitzky-Golay,7,2	0.13/0.80	0.763	NBS: ISConc=-1; Initial: LimitLow=0, LimitHigh=10; Retest: LimitLow=0.04, LimitHigh=10; Recall: LimitLow=0.04, LimitHigh=10; Recall retest: LimitLow=0.04, LimitHigh=10	Peak Area	5	0	10
HIE with sampling at different times (A)	HIE-6h	ESI1	1	C4	sample0011_134018	8000086436	Initial	MRM+	232.20/85.00	Qualifier	C4 IS	0	0.073	18677	660	0	0	368756	9795	Savitzky-Golay,7,2	0.13/0.80	0.733	NBS: ISConc=1.45; Initial: LimitLow=0, LimitHigh=1.5; Retest: LimitLow=0, LimitHigh=1.5; Recall: LimitLow=0, LimitHigh=1.5; Recall retest: LimitLow=0, LimitHigh=1.5; LC: TargetConc=0.74, Stdev=0.1; HC: TargetConc=2.74, Stdev=0.33	Peak Area	0.75	0	1.5
HIE with sampling at different times (A)	HIE-6h	ESI1	1	C4 IS	sample0011_134018	8000086436	Initial	MRM+	235.20/85.00	IS		1.45	0	368756	9795	0	0	0	0	Savitzky-Golay,7,2	0.13/0.80	0.293	NBS: Internal Standard;	Peak Area	0	0	0
HIE with sampling at different times (A)	HIE-6h	ESI1	1	C4DC\C5OH	sample0011_134018	8000086436	Initial	MRM+	262.20/85.00	Qualifier	C5 IS	0	0.049	12872	531	0	0	401255	11711	Savitzky-Golay,7,2	0.13/0.80	0.499	NBS: ISConc=-1; Initial: LimitLow=0, LimitHigh=0.5; Retest: LimitLow=0, LimitHigh=0.5; Recall: LimitLow=0, LimitHigh=0.5; Recall retest: LimitLow=0, LimitHigh=0.5	Peak Area	0.25	0	0.5
HIE with sampling at different times (A)	HIE-6h	ESI1	1	C5	sample0011_134018	8000086436	Initial	MRM+	246.20/85.00	Qualifier	C5 IS	0	0.083	22944	838	0	0	401255	11711	Savitzky-Golay,7,2	0.13/0.80	0.147	NBS: ISConc=1.52; Initial: LimitLow=0, LimitHigh=0.56; Retest: LimitLow=0, LimitHigh=0.56; Recall: LimitLow=0, LimitHigh=0.56; Recall retest: LimitLow=0, LimitHigh=0.56; LC: TargetConc=0.63, Stdev=0.08; HC: TargetConc=2.46, Stdev=0.3	Peak Area	0.28	0	0.56
HIE with sampling at different times (A)	HIE-6h	ESI1	1	C5 IS	sample0011_134018	8000086436	Initial	MRM+	255.20/85.00	IS		1.52	0	401255	11711	0	0	0	0	Savitzky-Golay,7,2	0.13/0.80	0.147	NBS: Internal Standard;	Peak Area	0	0	0
HIE with sampling at different times (A)	HIE-6h	ESI1	1	C5:1	sample0011_134018	8000086436	Initial	MRM+	244.20/85.00	Qualifier	C5 IS	0	0.031	8158	259	0	0	401255	11711	Savitzky-Golay,7,2	0.13/0.80	0.293	NBS: ISConc=-1; Initial: LimitLow=0, LimitHigh=0.15; Retest: LimitLow=0, LimitHigh=0.15; Recall: LimitLow=0, LimitHigh=0.15; Recall retest: LimitLow=0, LimitHigh=0.15	Peak Area	0.075	0	0.15
HIE with sampling at different times (A)	HIE-6h	ESI1	1	C5DC\C6OH	sample0011_134018	8000086436	Initial	MRM+	276.20/85.00	Qualifier	C5DC\C6OH IS	0	0.059	4702	207	0	0	118290	3576	Savitzky-Golay,7,2	0.13/0.80	0.44	NBS: ISConc=1.49; Initial: LimitLow=0, LimitHigh=0.3; Retest: LimitLow=0, LimitHigh=0.3; Recall: LimitLow=0, LimitHigh=0.3; Recall retest: LimitLow=0, LimitHigh=0.3; LC: TargetConc=0.39, Stdev=0.09; HC: TargetConc=1.98, Stdev=0.24	Peak Area	0.15	0	0.3
HIE with sampling at different times (A)	HIE-6h	ESI1	1	C5DC\C6OH IS	sample0011_134018	8000086436	Initial	MRM+	282.20/85.00	IS		1.49	0	118290	3576	0	0	0	0	Savitzky-Golay,7,2	0.13/0.80	0.411	NBS: Internal Standard;	Peak Area	0	0	0
HIE with sampling at different times (A)	HIE-6h	ESI1	1	C6	sample0011_134018	8000086436	Initial	MRM+	260.20/85.00	Qualifier	C6 IS	0	0.003	798	84	0	0	309263	9202	Savitzky-Golay,7,2	0.13/0.80	0.205	NBS: ISConc=1.03; Initial: LimitLow=0, LimitHigh=0.2; Retest: LimitLow=0, LimitHigh=0.2; Recall: LimitLow=0, LimitHigh=0.2; Recall retest: LimitLow=0, LimitHigh=0.2; LC: TargetConc=0.29, Stdev=0.09; HC: TargetConc=1.4, Stdev=0.17	Peak Area	0.1	0	0.2
HIE with sampling at different times (A)	HIE-6h	ESI1	1	C6 IS	sample0011_134018	8000086436	Initial	MRM+	263.20/85.00	IS		1.03	0	309263	9202	0	0	0	0	Savitzky-Golay,7,2	0.13/0.80	0.147	NBS: Internal Standard;	Peak Area	0	0	0
HIE with sampling at different times (A)	HIE-6h	ESI1	1	C6DC	sample0011_134018	8000086436	Initial	MRM+	290.20/85.00	Qualifier	C5DC\C6OH IS	0	0.041	3245	138	0	0	118290	3576	Savitzky-Golay,7,2	0.13/0.80	0.147	NBS: ISConc=-1;	Peak Area	0	0	0
HIE with sampling at different times (A)	HIE-6h	ESI1	1	C8	sample0011_134018	8000086436	Initial	MRM+	288.20/85.00	Qualifier	C8 IS	0	0.09	24902	789	0	0	290753	9429	Savitzky-Golay,7,2	0.13/0.80	0.264	NBS: ISConc=1.04; Initial: LimitLow=0, LimitHigh=0.4; Retest: LimitLow=0, LimitHigh=0.4; Recall: LimitLow=0, LimitHigh=0.4; Recall retest: LimitLow=0, LimitHigh=0.4; LC: TargetConc=0.55, Stdev=0.08; HC: TargetConc=2.76, Stdev=0.33	Peak Area	0.2	0	0.4
HIE with sampling at different times (A)	HIE-6h	ESI1	1	C8 IS	sample0011_134018	8000086436	Initial	MRM+	291.20/85.00	IS		1.04	0	290753	9429	0	0	0	0	Savitzky-Golay,7,2	0.13/0.80	0.147	NBS: Internal Standard;	Peak Area	0	0	0
HIE with sampling at different times (A)	HIE-6h	ESI1	1	C8:1	sample0011_134018	8000086436	Initial	MRM+	286.20/85.00	Qualifier	C8 IS	0	0.01	2722	100	0	0	290753	9429	Savitzky-Golay,7,2	0.13/0.80	0.411	NBS: ISConc=-1;	Peak Area	0	0	0
HIE with sampling at different times (A)	HIE-6h	ESI1	1	C10	sample0011_134018	8000086436	Initial	MRM+	316.20/85.00	Qualifier	C10 IS	0	0.207	60940	2179	0	0	321885	10093	Savitzky-Golay,7,2	0.13/0.80	0.147	NBS: ISConc=0.91; Initial: LimitLow=0, LimitHigh=0.29; Retest: LimitLow=0, LimitHigh=0.29; Recall: LimitLow=0, LimitHigh=0.29; Recall retest: LimitLow=0, LimitHigh=0.29; LC: TargetConc=0.31, Stdev=0.09; HC: TargetConc=2.02, Stdev=0.24	Peak Area	0.145	0	0.29
HIE with sampling at different times (A)	HIE-6h	ESI1	1	C10 IS	sample0011_134018	8000086436	Initial	MRM+	319.30/85.00	IS		0.91	0	321885	10093	0	0	0	0	Savitzky-Golay,7,2	0.13/0.80	0.176	NBS: Internal Standard;	Peak Area	0	0	0
HIE with sampling at different times (A)	HIE-6h	ESI1	1	C10:1	sample0011_134018	8000086436	Initial	MRM+	314.20/85.00	Qualifier	C10 IS	0	0.014	5111	250	0	0	321885	10093	Savitzky-Golay,7,2	0.13/0.80	0.293	NBS: ISConc=-1; Initial: LimitLow=0, LimitHigh=0.3; Retest: LimitLow=0, LimitHigh=0.3; Recall: LimitLow=0, LimitHigh=0.3; Recall retest: LimitLow=0, LimitHigh=0.3	Peak Area	0.15	0	0.3
HIE with sampling at different times (A)	HIE-6h	ESI1	1	C10:2	sample0011_134018	8000086436	Initial	MRM+	312.20/85.00	Qualifier	C10 IS	0	0.003	1202	70	0	0	321885	10093	Savitzky-Golay,7,2	0.13/0.80	0.675	NBS: ISConc=-1; Initial: LimitLow=0, LimitHigh=100; Retest: LimitLow=0, LimitHigh=100; Recall: LimitLow=0, LimitHigh=100; Recall retest: LimitLow=0, LimitHigh=100	Peak Area	50	0	100
HIE with sampling at different times (A)	HIE-6h	ESI1	1	C12	sample0011_134018	8000086436	Initial	MRM+	344.30/85.00	Qualifier	C12 IS	0	0.286	119153	3860	0	0	433617	14166	Savitzky-Golay,7,2	0.13/0.80	0.147	NBS: ISConc=1; Initial: LimitLow=0, LimitHigh=0.33; Retest: LimitLow=0, LimitHigh=0.33; Recall: LimitLow=0, LimitHigh=0.33; Recall retest: LimitLow=0, LimitHigh=0.33; LC: TargetConc=0.28, Stdev=0.09; HC: TargetConc=1.36, Stdev=0.16	Peak Area	0.165	0	0.33
HIE with sampling at different times (A)	HIE-6h	ESI1	1	C12 IS	sample0011_134018	8000086436	Initial	MRM+	347.30/85.00	IS		1	0	433617	14166	0	0	0	0	Savitzky-Golay,7,2	0.13/0.80	0.176	NBS: Internal Standard;	Peak Area	0	0	0
HIE with sampling at different times (A)	HIE-6h	ESI1	1	C12:1	sample0011_134018	8000086436	Initial	MRM+	342.30/85.00	Qualifier	C12 IS	0	0.021	8970	380	0	0	433617	14166	Savitzky-Golay,7,2	0.13/0.80	0.733	NBS: ISConc=-1; Initial: LimitLow=0, LimitHigh=1000; Retest: LimitLow=0, LimitHigh=1000; Recall: LimitLow=0, LimitHigh=1000; Recall retest: LimitLow=0, LimitHigh=10000	Peak Area	500	0	1000
HIE with sampling at different times (A)	HIE-6h	ESI1	1	C14	sample0011_134018	8000086436	Initial	MRM+	372.30/85.00	Qualifier	C14 IS	0	0.449	229646	6727	0	0	558231	17237	Savitzky-Golay,7,2	0.13/0.80	0.176	NBS: ISConc=1.02; Initial: LimitLow=0, LimitHigh=0.59; Retest: LimitLow=0, LimitHigh=0.59; Recall: LimitLow=0, LimitHigh=0.59; Recall retest: LimitLow=0, LimitHigh=0.59; LC: TargetConc=0.33, Stdev=0.09; HC: TargetConc=1.9, Stdev=0.23	Peak Area	0.295	0	0.59
HIE with sampling at different times (A)	HIE-6h	ESI1	1	C14 IS	sample0011_134018	8000086436	Initial	MRM+	375.30/85.00	IS		1.02	0	558231	17237	0	0	0	0	Savitzky-Golay,7,2	0.13/0.80	0.147	NBS: Internal Standard;	Peak Area	0	0	0
HIE with sampling at different times (A)	HIE-6h	ESI1	1	C14:1	sample0011_134018	8000086436	Initial	MRM+	370.30/85.00	Qualifier	C14 IS	0	0.049	26826	855	0	0	558231	17237	Savitzky-Golay,7,2	0.13/0.80	0.381	NBS: ISConc=-1; Initial: LimitLow=0, LimitHigh=0.32; Retest: LimitLow=0, LimitHigh=0.32; Recall: LimitLow=0, LimitHigh=0.32; Recall retest: LimitLow=0, LimitHigh=0.32	Peak Area	0.16	0	0.32
HIE with sampling at different times (A)	HIE-6h	ESI1	1	C14:2	sample0011_134018	8000086436	Initial	MRM+	368.30/85.00	Qualifier	C14 IS	0	0.007	3753	199	0	0	558231	17237	Savitzky-Golay,7,2	0.13/0.80	0.264	NBS: ISConc=-1;	Peak Area	0	0	0
HIE with sampling at different times (A)	HIE-6h	ESI1	1	C14OH	sample0011_134018	8000086436	Initial	MRM+	388.30/85.00	Qualifier	C14 IS	0	0	0	0	0	0	558231	17237	Savitzky-Golay,7,2	0.13/0.80	0.763	NBS: ISConc=-1; Initial: LimitLow=0, LimitHigh=0.2; Retest: LimitLow=0, LimitHigh=0.2; Recall: LimitLow=0, LimitHigh=0.2; Recall retest: LimitLow=0, LimitHigh=0.2	Peak Area	0.1	0	0.2
HIE with sampling at different times (A)	HIE-6h	ESI1	1	C16	sample0011_134018	8000086436	Initial	MRM+	400.30/85.00	Qualifier	C16 IS	0	1.661	899164	28138	0	0	515390	15397	Savitzky-Golay,7,2	0.13/0.80	0.147	NBS: ISConc=0.89; Initial: LimitLow=0.3, LimitHigh=8.5; Retest: LimitLow=0.3, LimitHigh=8.5; Recall: LimitLow=0.3, LimitHigh=8.5; Recall retest: LimitLow=0.3, LimitHigh=8.5; LC: TargetConc=2.02, Stdev=0.24; HC: TargetConc=11.7, Stdev=1.4	Peak Area	4.4	0.3	8.5
HIE with sampling at different times (A)	HIE-6h	ESI1	1	C16 IS	sample0011_134018	8000086436	Initial	MRM+	403.40/85.00	IS		0.89	0	515390	15397	0	0	0	0	Savitzky-Golay,7,2	0.13/0.80	0.147	NBS: Internal Standard;	Peak Area	0	0	0
HIE with sampling at different times (A)	HIE-6h	ESI1	1	C16:1	sample0011_134018	8000086436	Initial	MRM+	398.30/85.00	Qualifier	C16 IS	0	0.063	36664	1208	0	0	515390	15397	Savitzky-Golay,7,2	0.13/0.80	0.176	NBS: ISConc=-1;	Peak Area	0	0	0
HIE with sampling at different times (A)	HIE-6h	ESI1	1	C16OH	sample0011_134018	8000086436	Initial	MRM+	416.30/85.00	Qualifier	C16 IS	0	0.017	9764	427	0	0	515390	15397	Savitzky-Golay,7,2	0.13/0.80	0.235	NBS: ISConc=-1; Initial: LimitLow=0, LimitHigh=0.19; Retest: LimitLow=0, LimitHigh=0.19; Recall: LimitLow=0, LimitHigh=0.19; Recall retest: LimitLow=0, LimitHigh=0.19	Peak Area	0.095	0	0.19
HIE with sampling at different times (A)	HIE-6h	ESI1	1	C16:1OH\C17	sample0011_134018	8000086436	Initial	MRM+	414.30/85.00	Qualifier	C16 IS	0	0.056	32231	1214	0	0	515390	15397	Savitzky-Golay,7,2	0.13/0.80	0.205	NBS: ISConc=-1; Initial: LimitLow=0, LimitHigh=0.22; Retest: LimitLow=0, LimitHigh=0.22; Recall: LimitLow=0, LimitHigh=0.22; Recall retest: LimitLow=0, LimitHigh=0.22	Peak Area	0.11	0	0.22
HIE with sampling at different times (A)	HIE-6h	ESI1	1	C18	sample0011_134018	8000086436	Initial	MRM+	428.40/85.00	Qualifier	C18 IS	0	0.539	303415	8541	0	0	626197	18622	Savitzky-Golay,7,2	0.13/0.80	0.176	NBS: ISConc=0.92; Initial: LimitLow=0.13, LimitHigh=2.5; Retest: LimitLow=0.13, LimitHigh=2.5; Recall: LimitLow=0.13, LimitHigh=2.5; Recall retest: LimitLow=0.13, LimitHigh=2.5; LC: TargetConc=1.14, Stdev=0.14; HC: TargetConc=4.32, Stdev=0.52	Peak Area	1.315	0.13	2.5
HIE with sampling at different times (A)	HIE-6h	ESI1	1	C18 IS	sample0011_134018	8000086436	Initial	MRM+	431.40/85.00	IS		0.92	0	626197	18622	0	0	0	0	Savitzky-Golay,7,2	0.13/0.80	0.147	NBS: Internal Standard;	Peak Area	0	0	0
HIE with sampling at different times (A)	HIE-6h	ESI1	1	C18:1	sample0011_134018	8000086436	Initial	MRM+	426.40/85.00	Qualifier	C18 IS	0	0.714	486270	13767	0	0	626197	18622	Savitzky-Golay,7,2	0.13/0.80	0.147	NBS: ISConc=-1; Initial: LimitLow=0.15, LimitHigh=3.35; Retest: LimitLow=0.15, LimitHigh=3.35; Recall: LimitLow=0.15, LimitHigh=3.35; Recall retest: LimitLow=0.15, LimitHigh=3.35	Peak Area	1.75	0.15	3.35
HIE with sampling at different times (A)	HIE-6h	ESI1	1	C18:2	sample0011_134018	8000086436	Initial	MRM+	424.30/85.00	Qualifier	C18 IS	0	0.009	5825	272	0	0	626197	18622	Savitzky-Golay,7,2	0.13/0.80	0.147	NBS: ISConc=-1;	Peak Area	0	0	0
HIE with sampling at different times (A)	HIE-6h	ESI1	1	C18OH	sample0011_134018	8000086436	Initial	MRM+	444.40/85.00	Qualifier	C18 IS	0	0.018	11997	448	0	0	626197	18622	Savitzky-Golay,7,2	0.13/0.80	0.352	NBS: ISConc=-1; Initial: LimitLow=0, LimitHigh=0.14; Retest: LimitLow=0, LimitHigh=0.14; Recall: LimitLow=0, LimitHigh=0.14; Recall retest: LimitLow=0, LimitHigh=0.14	Peak Area	0.07	0	0.14
HIE with sampling at different times (A)	HIE-6h	ESI1	1	C18:1OH	sample0011_134018	8000086436	Initial	MRM+	442.40/85.00	Qualifier	C18 IS	0	0.035	24150	799	0	0	626197	18622	Savitzky-Golay,7,2	0.13/0.80	0.293	NBS: ISConc=-1; Initial: LimitLow=0, LimitHigh=0.16; Retest: LimitLow=0, LimitHigh=0.16; Recall: LimitLow=0, LimitHigh=0.16; Recall retest: LimitLow=0, LimitHigh=0.16	Peak Area	0.08	0	0.16
HIE with sampling at different times (A)	HIE-6h	ESI1	1	C18:2OH	sample0011_134018	8000086436	Initial	MRM+	440.30/85.00	Qualifier	C18 IS	0	0.054	36930	1291	0	0	626197	18622	Savitzky-Golay,7,2	0.13/0.80	0.176	NBS: ISConc=-1;	Peak Area	0	0	0
HIE with sampling at different times (A)	HIE-6h	ESI1	1	C20	sample0011_134018	8000086436	Initial	MRM+	456.40/85.00	Qualifier	C26 IS	0	0.028	24752	813	0	0	947670	25322	Savitzky-Golay,7,2	0.13/0.80	0.147	NBS: ISConc=-1;	Peak Area	0	0	0
HIE with sampling at different times (A)	HIE-6h	ESI1	1	C22	sample0011_134018	8000086436	Initial	MRM+	484.40/85.00	Qualifier	C26 IS	0	0.012	10153	451	0	0	947670	25322	Savitzky-Golay,7,2	0.13/0.80	0.147	NBS: ISConc=-1;	Peak Area	0	0	0
HIE with sampling at different times (A)	HIE-6h	ESI1	1	C24	sample0011_134018	8000086436	Initial	MRM+	512.50/85.00	Qualifier	C26 IS	0	0.032	27391	913	0	0	947670	25322	Savitzky-Golay,7,2	0.13/0.80	0.147	NBS: ISConc=-1;	Peak Area	0	0	0
HIE with sampling at different times (A)	HIE-6h	ESI1	1	C26	sample0011_134018	8000086436	Initial	MRM+	540.50/85.00	Qualifier	C26 IS	0	0.008	6003	216	0	0	947670	25322	Savitzky-Golay,7,2	0.13/0.80	0.528	NBS: ISConc=1.09; LC: TargetConc=0.61, Stdev=0.09; HC: TargetConc=1.66, Stdev=0.2	Peak Area	0	0	0
HIE with sampling at different times (A)	HIE-6h	ESI1	1	C26 IS	sample0011_134018	8000086436	Initial	MRM+	543.50/85.00	IS		1.09	0	947670	25322	0	0	0	0	Savitzky-Golay,7,2	0.13/0.80	0.147	NBS: Internal Standard;	Peak Area	0	0	0
HIE with sampling at different times (A)	HIE-6h	ESI1	1	SA	sample0011_134018	8000086436	Initial	MRM+	155.10/109.10	Qualifier	SA IS	0	0.351	9736	349	0	0	1613678	46248	Savitzky-Golay,7,2	0.13/0.80	0.293	NBS: ISConc=58.1; Initial: LimitLow=0, LimitHigh=2; Retest: LimitLow=0, LimitHigh=2; Recall: LimitLow=0, LimitHigh=2; Recall retest: LimitLow=0, LimitHigh=2; LC: TargetConc=2.57, Stdev=0.38; HC: TargetConc=10.4, Stdev=1.2	Peak Area	1	0	2
HIE with sampling at different times (A)	HIE-6h	ESI1	1	SA IS	sample0011_134018	8000086436	Initial	MRM+	160.10/114.10	IS		58.1	0	1613678	46248	0	0	0	0	Savitzky-Golay,7,2	0.13/0.80	0.205	NBS: Internal Standard;	Peak Area	0	0	0
HIE with sampling at different times (A)	HIE-6h	ESI1	1	ADO	sample0011_134018	8000086436	Initial	MRM+	268.10/136.10	Qualifier	ADO IS	0	0.052	3816	196	0	0	489164	16380	Savitzky-Golay,7,2	0.13/0.80	0.205	NBS: ISConc=9.44; LC: TargetConc=2.51, Stdev=0.34; HC: TargetConc=6.91, Stdev=0.83	Peak Area	0	0	0
HIE with sampling at different times (A)	HIE-6h	ESI1	1	ADO IS	sample0011_134018	8000086436	Initial	MRM+	273.10/136.10	IS		9.44	0	489164	16380	0	0	0	0	Savitzky-Golay,7,2	0.13/0.80	0.176	NBS: Internal Standard;	Peak Area	0	0	0
HIE with sampling at different times (A)	HIE-6h	ESI1	1	D-ADO	sample0011_134018	8000086436	Initial	MRM+	252.10/136.10	Qualifier	D-ADO IS	0	0.032	1882	93	0	0	571940	18780	Savitzky-Golay,7,2	0.13/0.80	0.381	NBS: ISConc=9.82;	Peak Area	0	0	0
HIE with sampling at different times (A)	HIE-6h	ESI1	1	D-ADO IS	sample0011_134018	8000086436	Initial	MRM+	257.10/136.10	IS		9.82	0	571940	18780	0	0	0	0	Savitzky-Golay,7,2	0.13/0.80	0.176	NBS: Internal Standard;	Peak Area	0	0	0
HIE with sampling at different times (A)	HIE-6h	ESI1	1	C20:0-LPC	sample0011_134018	8000086436	Initial	MRM+	552.40/104.10	Qualifier	C26:0-LPC IS	0	2.439	159085	4347	0	0	287014	7936	Savitzky-Golay,7,2	0.13/0.80	0.381	NBS: ISConc=-1;	Peak Area	0	0	0
HIE with sampling at different times (A)	HIE-6h	ESI1	1	C22:0-LPC	sample0011_134018	8000086436	Initial	MRM+	580.40/104.10	Qualifier	C26:0-LPC IS	0	1.194	77879	2411	0	0	287014	7936	Savitzky-Golay,7,2	0.13/0.80	0.323	NBS: ISConc=-1;	Peak Area	0	0	0
HIE with sampling at different times (A)	HIE-6h	ESI1	1	C24:0-LPC	sample0011_134018	8000086436	Initial	MRM+	608.50/104.10	Qualifier	C26:0-LPC IS	0	1.738	113342	3521	0	0	287014	7936	Savitzky-Golay,7,2	0.13/0.80	0.176	NBS: ISConc=-1;	Peak Area	0	0	0
HIE with sampling at different times (A)	HIE-6h	ESI1	1	C26:0-LPC	sample0011_134018	8000086436	Initial	MRM+	636.50/104.10	Qualifier	C26:0-LPC IS	0	0.501	36344	1072	0	0	287014	7936	Savitzky-Golay,7,2	0.13/0.80	0.411	NBS: ISConc=4.4; LC: TargetConc=0.92, Stdev=0.11; HC: TargetConc=3.04, Stdev=0.36	Peak Area	0	0	0
HIE with sampling at different times (A)	HIE-6h	ESI1	1	C26:0-LPC IS	sample0011_134018	8000086436	Initial	MRM+	640.50/104.10	IS		4.4	0	287014	7936	0	0	0	0	Savitzky-Golay,7,2	0.13/0.80	0.469	NBS: Internal Standard;	Peak Area	0	0	0
HIE with sampling at different times (A)	HIE-6h	ESI1	1	ASA	sample0011_134018	8000086436	Initial	MRM+	291.10/70.10	Qualifier	Arg IS	0	1.393	30735	1403	0	0	1045951	30078	Savitzky-Golay,7,2	0.13/0.80	0.264	NBS: --	Peak Area	0	0	0
HIE with sampling at different times (A)	HIE-6h	ESI1	1	ASA anhydride I + II	sample0011_134018	8000086436	Initial	MRM+	273.10/70.10	Qualifier	Arg IS	0	0.402	8868	327	0	0	1045951	30078	Savitzky-Golay,7,2	0.13/0.80	0.381	NBS: --	Peak Area	0	0	0
HIE with sampling at different times (A)	HIE-6h			ASATotal	sample0011_134018	8000086436	Initial	N/A	0.00/0.00	Qualifier	Arg IS	0	1.813	39603	1730	0	0	1045951	30078	Savitzky-Golay,7,2	0.13/0.80	0	NBS: ISConc=-1; Initial: LimitLow=0, LimitHigh=1.5; Retest: LimitLow=0, LimitHigh=1.5; Recall: LimitLow=0, LimitHigh=1.5; Recall retest: LimitLow=0, LimitHigh=1.5; LC: TargetConc=2.22, Stdev=0.38; HC: TargetConc=39, Stdev=4.7	Peak Area	0.75	0	1.5
HIE with sampling at different times (A)	HIE-6h	ESI1	1	Ala	sample0012_134202	8000086445	Initial	MRM+	90.10/44.00	Qualifier	Ala IS	0	413.785	843457	24764	0	0	278954	8390	Savitzky-Golay,7,2	0.13/0.80	0.205	NBS: ISConc=115; Initial: LimitLow=0, LimitHigh=10000; Retest: LimitLow=0, LimitHigh=10000; Recall: LimitLow=0, LimitHigh=10000; Recall retest: LimitLow=0, LimitHigh=10000; LC: TargetConc=479, Stdev=57; HC: TargetConc=967, Stdev=116	Peak Area	5000	0	10000
HIE with sampling at different times (A)	HIE-6h	ESI1	1	Ala IS	sample0012_134202	8000086445	Initial	MRM+	93.10/47.10	IS		115	0	278954	8390	0	0	0	0	Savitzky-Golay,7,2	0.13/0.80	0.176	NBS: Internal Standard;	Peak Area	0	0	0
HIE with sampling at different times (A)	HIE-6h	ESI1	1	Arg	sample0012_134202	8000086445	Initial	MRM+	175.10/70.10	Qualifier	Arg IS	0	200.122	3957377	110605	0	0	946701	25819	Savitzky-Golay,7,2	0.13/0.80	0.205	NBS: ISConc=47.4; Initial: LimitLow=0, LimitHigh=70; Retest: LimitLow=0, LimitHigh=70; Recall: LimitLow=0, LimitHigh=70; Recall retest: LimitLow=0, LimitHigh=70; LC: TargetConc=24.2, Stdev=2.9; HC: TargetConc=136, Stdev=16	Peak Area	35	0	70
HIE with sampling at different times (A)	HIE-6h	ESI1	1	Arg IS	sample0012_134202	8000086445	Initial	MRM+	180.10/75.10	IS		47.4	0	946701	25819	0	0	0	0	Savitzky-Golay,7,2	0.13/0.80	0.205	NBS: Internal Standard;	Peak Area	0	0	0
HIE with sampling at different times (A)	HIE-6h	ESI1	1	Cit	sample0012_134202	8000086445	Initial	MRM+	176.10/113.10	Qualifier	Cit IS	0	74.643	210097	6140	0	0	260172	7595	Savitzky-Golay,7,2	0.13/0.80	0.205	NBS: ISConc=81.8; Initial: LimitLow=0, LimitHigh=80; Retest: LimitLow=0, LimitHigh=80; Recall: LimitLow=0, LimitHigh=80; Recall retest: LimitLow=0, LimitHigh=80; LC: TargetConc=33.1, Stdev=4; HC: TargetConc=147, Stdev=18	Peak Area	40	0	80
HIE with sampling at different times (A)	HIE-6h	ESI1	1	Cit IS	sample0012_134202	8000086445	Initial	MRM+	178.10/115.10	IS		81.8	0	260172	7595	0	0	0	0	Savitzky-Golay,7,2	0.13/0.80	0.205	NBS: Internal Standard;	Peak Area	0	0	0
HIE with sampling at different times (A)	HIE-6h	ESI1	1	Gln\Lys	sample0012_134202	8000086445	Initial	MRM+	147.10/84.00	Qualifier	Gln\Lys IS	0	198.405	1058827	31176	0	0	476940	12623	Savitzky-Golay,7,2	0.13/0.80	0.205	NBS: ISConc=99.3; LC: TargetConc=635, Stdev=76; HC: TargetConc=1350, Stdev=160	Peak Area	0	0	0
HIE with sampling at different times (A)	HIE-6h	ESI1	1	Gln\Lys IS	sample0012_134202	8000086445	Initial	MRM+	152.10/88.10	IS		99.3	0	476940	12623	0	0	0	0	Savitzky-Golay,7,2	0.13/0.80	0.205	NBS: Internal Standard;	Peak Area	0	0	0
HIE with sampling at different times (A)	HIE-6h	ESI1	1	Glu	sample0012_134202	8000086445	Initial	MRM+	148.10/84.00	Qualifier	Gln\Lys IS	0	314.809	1512034	43312	0	0	476940	12623	Savitzky-Golay,7,2	0.13/0.80	0.205	NBS: ISConc=-1;	Peak Area	0	0	0
HIE with sampling at different times (A)	HIE-6h	ESI1	1	Gly	sample0012_134202	8000086445	Initial	MRM+	76.00/30.00	Qualifier	Gly IS	0	492.703	336118	10213	0	0	407432	11858	Savitzky-Golay,7,2	0.13/0.80	0.205	NBS: ISConc=553; LC: TargetConc=549, Stdev=66; HC: TargetConc=1320, Stdev=160	Peak Area	0	0	0
HIE with sampling at different times (A)	HIE-6h	ESI1	1	Gly IS	sample0012_134202	8000086445	Initial	MRM+	78.00/32.00	IS		553	0	407432	11858	0	0	0	0	Savitzky-Golay,7,2	0.13/0.80	0.205	NBS: Internal Standard;	Peak Area	0	0	0
HIE with sampling at different times (A)	HIE-6h	ESI1	1	Leu\Ile\Pro-OH	sample0012_134202	8000086445	Initial	MRM+	132.10/86.10	Qualifier	Leu\Ile\Pro-OH IS	0	348.987	9162027	276692	0	0	2678086	80795	Savitzky-Golay,7,2	0.13/0.80	0.205	NBS: ISConc=101; Initial: LimitLow=0, LimitHigh=380; Retest: LimitLow=0, LimitHigh=380; Recall: LimitLow=0, LimitHigh=380; Recall retest: LimitLow=0, LimitHigh=380; LC: TargetConc=183, Stdev=22; HC: TargetConc=772, Stdev=93	Peak Area	190	0	380
HIE with sampling at different times (A)	HIE-6h	ESI1	1	Leu\Ile\Pro-OH IS	sample0012_134202	8000086445	Initial	MRM+	135.10/89.10	IS		101	0	2678086	80795	0	0	0	0	Savitzky-Golay,7,2	0.13/0.80	0.205	NBS: Internal Standard;	Peak Area	0	0	0
HIE with sampling at different times (A)	HIE-6h	ESI1	1	Met	sample0012_134202	8000086445	Initial	MRM+	150.10/104.10	Qualifier	Met IS	0	21.189	99349	2954	0	0	542254	14868	Savitzky-Golay,7,2	0.13/0.80	0.176	NBS: ISConc=99.7; Initial: LimitLow=7, LimitHigh=80; Retest: LimitLow=7, LimitHigh=80; Recall: LimitLow=7, LimitHigh=80; Recall retest: LimitLow=7, LimitHigh=80; LC: TargetConc=36, Stdev=4.3; HC: TargetConc=177, Stdev=21	Peak Area	43.5	7	80
HIE with sampling at different times (A)	HIE-6h	ESI1	1	Met IS	sample0012_134202	8000086445	Initial	MRM+	153.10/107.10	IS		99.7	0	542254	14868	0	0	0	0	Savitzky-Golay,7,2	0.13/0.80	0.176	NBS: Internal Standard;	Peak Area	0	0	0
HIE with sampling at different times (A)	HIE-6h	ESI1	1	Orn	sample0012_134202	8000086445	Initial	MRM+	133.10/70.10	Qualifier	Orn IS	0	73.914	438473	14010	0	0	646610	20438	Savitzky-Golay,7,2	0.13/0.80	0.205	NBS: ISConc=109; LC: TargetConc=154, Stdev=18; HC: TargetConc=488, Stdev=59	Peak Area	0	0	0
HIE with sampling at different times (A)	HIE-6h	ESI1	1	Orn IS	sample0012_134202	8000086445	Initial	MRM+	139.10/76.10	IS		109	0	646610	20438	0	0	0	0	Savitzky-Golay,7,2	0.13/0.80	0.205	NBS: Internal Standard;	Peak Area	0	0	0
HIE with sampling at different times (A)	HIE-6h	ESI1	1	Phe	sample0012_134202	8000086445	Initial	MRM+	166.10/120.10	Qualifier	Phe IS	0	81.29	3008120	85195	0	0	2869511	80792	Savitzky-Golay,7,2	0.13/0.80	0.205	NBS: ISConc=71.8; Initial: LimitLow=0, LimitHigh=120; Retest: LimitLow=0, LimitHigh=120; Recall: LimitLow=0, LimitHigh=120; Recall retest: LimitLow=0, LimitHigh=120; LC: TargetConc=79.4, Stdev=9.5; HC: TargetConc=264, Stdev=32	Peak Area	60	0	120
HIE with sampling at different times (A)	HIE-6h	ESI1	1	Phe IS	sample0012_134202	8000086445	Initial	MRM+	172.10/126.10	IS		71.8	0	2869511	80792	0	0	0	0	Savitzky-Golay,7,2	0.13/0.80	0.205	NBS: Internal Standard;	Peak Area	0	0	0
HIE with sampling at different times (A)	HIE-6h	ESI1	1	Pro	sample0012_134202	8000086445	Initial	MRM+	116.10/70.10	Qualifier	Pro IS	0	194.086	4145732	116194	0	0	1672935	47515	Savitzky-Golay,7,2	0.13/0.80	0.205	NBS: ISConc=88; LC: TargetConc=235, Stdev=28; HC: TargetConc=683, Stdev=82	Peak Area	0	0	0
HIE with sampling at different times (A)	HIE-6h	ESI1	1	Pro IS	sample0012_134202	8000086445	Initial	MRM+	121.10/74.10	IS		88	0	1672935	47515	0	0	0	0	Savitzky-Golay,7,2	0.13/0.80	0.205	NBS: Internal Standard;	Peak Area	0	0	0
HIE with sampling at different times (A)	HIE-6h	ESI1	1	Tyr	sample0012_134202	8000086445	Initial	MRM+	182.10/136.10	Qualifier	Tyr IS	0	147.378	1056381	30422	0	0	1012454	28463	Savitzky-Golay,7,2	0.13/0.80	0.205	NBS: ISConc=113; LC: TargetConc=136, Stdev=16; HC: TargetConc=549, Stdev=66	Peak Area	0	0	0
HIE with sampling at different times (A)	HIE-6h	ESI1	1	Tyr IS	sample0012_134202	8000086445	Initial	MRM+	188.10/142.10	IS		113	0	1012454	28463	0	0	0	0	Savitzky-Golay,7,2	0.13/0.80	0.176	NBS: Internal Standard;	Peak Area	0	0	0
HIE with sampling at different times (A)	HIE-6h	ESI1	1	Val	sample0012_134202	8000086445	Initial	MRM+	118.10/72.10	Qualifier	Val IS	0	224.22	3378832	99822	0	0	1822782	53621	Savitzky-Golay,7,2	0.13/0.80	0.205	NBS: ISConc=108; LC: TargetConc=213, Stdev=26; HC: TargetConc=470, Stdev=56	Peak Area	0	0	0
HIE with sampling at different times (A)	HIE-6h	ESI1	1	Val IS	sample0012_134202	8000086445	Initial	MRM+	124.10/77.10	IS		108	0	1822782	53621	0	0	0	0	Savitzky-Golay,7,2	0.13/0.80	0.205	NBS: Internal Standard;	Peak Area	0	0	0
HIE with sampling at different times (A)	HIE-6h	ESI1	1	C0	sample0012_134202	8000086445	Initial	MRM+	162.10/103.00	Qualifier	C0 IS	0	24.051	648862	17886	0	0	397132	12088	Savitzky-Golay,7,2	0.13/0.80	0.763	NBS: ISConc=11.5; Initial: LimitLow=8, LimitHigh=90; Retest: LimitLow=8, LimitHigh=90; Recall: LimitLow=8, LimitHigh=90; Recall retest: LimitLow=8, LimitHigh=90; LC: TargetConc=41, Stdev=4.9; HC: TargetConc=151, Stdev=18	Peak Area	49	8	90
HIE with sampling at different times (A)	HIE-6h	ESI1	1	C0 IS	sample0012_134202	8000086445	Initial	MRM+	171.20/103.00	IS		11.5	0	397132	12088	0	0	0	0	Savitzky-Golay,7,2	0.13/0.80	0.733	NBS: Internal Standard;	Peak Area	0	0	0
HIE with sampling at different times (A)	HIE-6h	ESI1	1	C2	sample0012_134202	8000086445	Initial	MRM+	204.10/85.00	Qualifier	C2 IS	0	5.814	956271	26727	0	0	864890	24354	Savitzky-Golay,7,2	0.13/0.80	0.733	NBS: ISConc=4.78; Initial: LimitLow=0, LimitHigh=115; Retest: LimitLow=0, LimitHigh=115; Recall: LimitLow=0, LimitHigh=115; Recall retest: LimitLow=0, LimitHigh=115; LC: TargetConc=27.6, Stdev=3.3; HC: TargetConc=82.4, Stdev=9.9	Peak Area	57.5	0	115
HIE with sampling at different times (A)	HIE-6h	ESI1	1	C2 IS	sample0012_134202	8000086445	Initial	MRM+	207.10/85.00	IS		4.78	0	864890	24354	0	0	0	0	Savitzky-Golay,7,2	0.13/0.80	0.763	NBS: Internal Standard;	Peak Area	0	0	0
HIE with sampling at different times (A)	HIE-6h	ESI1	1	C3	sample0012_134202	8000086445	Initial	MRM+	218.10/85.00	Qualifier	C3 IS	0	0.24	44643	1245	0	0	377437	10651	Savitzky-Golay,7,2	0.13/0.80	0.44	NBS: ISConc=2.03; Initial: LimitLow=0, LimitHigh=6.8; Retest: LimitLow=0, LimitHigh=6.8; Recall: LimitLow=0, LimitHigh=6.8; Recall retest: LimitLow=0, LimitHigh=6.8; LC: TargetConc=4.63, Stdev=0.56; HC: TargetConc=13.3, Stdev=1.6	Peak Area	3.4	0	6.8
HIE with sampling at different times (A)	HIE-6h	ESI1	1	C3 IS	sample0012_134202	8000086445	Initial	MRM+	221.20/85.00	IS		2.03	0	377437	10651	0	0	0	0	Savitzky-Golay,7,2	0.13/0.80	0.733	NBS: Internal Standard;	Peak Area	0	0	0
HIE with sampling at different times (A)	HIE-6h	ESI1	1	C3DC\C4OH	sample0012_134202	8000086445	Initial	MRM+	248.10/85.00	Qualifier	C4 IS	0	0.168	39486	1309	0	0	340549	9422	Savitzky-Golay,7,2	0.13/0.80	0.499	NBS: ISConc=-1; Initial: LimitLow=0, LimitHigh=10; Retest: LimitLow=0.04, LimitHigh=10; Recall: LimitLow=0.04, LimitHigh=10; Recall retest: LimitLow=0.04, LimitHigh=10	Peak Area	5	0	10
HIE with sampling at different times (A)	HIE-6h	ESI1	1	C4	sample0012_134202	8000086445	Initial	MRM+	232.20/85.00	Qualifier	C4 IS	0	0.046	10707	350	0	0	340549	9422	Savitzky-Golay,7,2	0.13/0.80	0.528	NBS: ISConc=1.45; Initial: LimitLow=0, LimitHigh=1.5; Retest: LimitLow=0, LimitHigh=1.5; Recall: LimitLow=0, LimitHigh=1.5; Recall retest: LimitLow=0, LimitHigh=1.5; LC: TargetConc=0.74, Stdev=0.1; HC: TargetConc=2.74, Stdev=0.33	Peak Area	0.75	0	1.5
HIE with sampling at different times (A)	HIE-6h	ESI1	1	C4 IS	sample0012_134202	8000086445	Initial	MRM+	235.20/85.00	IS		1.45	0	340549	9422	0	0	0	0	Savitzky-Golay,7,2	0.13/0.80	0.733	NBS: Internal Standard;	Peak Area	0	0	0
HIE with sampling at different times (A)	HIE-6h	ESI1	1	C4DC\C5OH	sample0012_134202	8000086445	Initial	MRM+	262.20/85.00	Qualifier	C5 IS	0	0.043	10732	488	0	0	380902	10498	Savitzky-Golay,7,2	0.13/0.80	0.264	NBS: ISConc=-1; Initial: LimitLow=0, LimitHigh=0.5; Retest: LimitLow=0, LimitHigh=0.5; Recall: LimitLow=0, LimitHigh=0.5; Recall retest: LimitLow=0, LimitHigh=0.5	Peak Area	0.25	0	0.5
HIE with sampling at different times (A)	HIE-6h	ESI1	1	C5	sample0012_134202	8000086445	Initial	MRM+	246.20/85.00	Qualifier	C5 IS	0	0.053	13880	545	0	0	380902	10498	Savitzky-Golay,7,2	0.13/0.80	0.381	NBS: ISConc=1.52; Initial: LimitLow=0, LimitHigh=0.56; Retest: LimitLow=0, LimitHigh=0.56; Recall: LimitLow=0, LimitHigh=0.56; Recall retest: LimitLow=0, LimitHigh=0.56; LC: TargetConc=0.63, Stdev=0.08; HC: TargetConc=2.46, Stdev=0.3	Peak Area	0.28	0	0.56
HIE with sampling at different times (A)	HIE-6h	ESI1	1	C5 IS	sample0012_134202	8000086445	Initial	MRM+	255.20/85.00	IS		1.52	0	380902	10498	0	0	0	0	Savitzky-Golay,7,2	0.13/0.80	0.264	NBS: Internal Standard;	Peak Area	0	0	0
HIE with sampling at different times (A)	HIE-6h	ESI1	1	C5:1	sample0012_134202	8000086445	Initial	MRM+	244.20/85.00	Qualifier	C5 IS	0	0.025	6211	256	0	0	380902	10498	Savitzky-Golay,7,2	0.13/0.80	0.323	NBS: ISConc=-1; Initial: LimitLow=0, LimitHigh=0.15; Retest: LimitLow=0, LimitHigh=0.15; Recall: LimitLow=0, LimitHigh=0.15; Recall retest: LimitLow=0, LimitHigh=0.15	Peak Area	0.075	0	0.15
HIE with sampling at different times (A)	HIE-6h	ESI1	1	C5DC\C6OH	sample0012_134202	8000086445	Initial	MRM+	276.20/85.00	Qualifier	C5DC\C6OH IS	0	0.045	3452	155	0	0	114850	3544	Savitzky-Golay,7,2	0.13/0.80	0.147	NBS: ISConc=1.49; Initial: LimitLow=0, LimitHigh=0.3; Retest: LimitLow=0, LimitHigh=0.3; Recall: LimitLow=0, LimitHigh=0.3; Recall retest: LimitLow=0, LimitHigh=0.3; LC: TargetConc=0.39, Stdev=0.09; HC: TargetConc=1.98, Stdev=0.24	Peak Area	0.15	0	0.3
HIE with sampling at different times (A)	HIE-6h	ESI1	1	C5DC\C6OH IS	sample0012_134202	8000086445	Initial	MRM+	282.20/85.00	IS		1.49	0	114850	3544	0	0	0	0	Savitzky-Golay,7,2	0.13/0.80	0.205	NBS: Internal Standard;	Peak Area	0	0	0
HIE with sampling at different times (A)	HIE-6h	ESI1	1	C6	sample0012_134202	8000086445	Initial	MRM+	260.20/85.00	Qualifier	C6 IS	0	0.004	1123	58	0	0	294370	8013	Savitzky-Golay,7,2	0.13/0.80	0.381	NBS: ISConc=1.03; Initial: LimitLow=0, LimitHigh=0.2; Retest: LimitLow=0, LimitHigh=0.2; Recall: LimitLow=0, LimitHigh=0.2; Recall retest: LimitLow=0, LimitHigh=0.2; LC: TargetConc=0.29, Stdev=0.09; HC: TargetConc=1.4, Stdev=0.17	Peak Area	0.1	0	0.2
HIE with sampling at different times (A)	HIE-6h	ESI1	1	C6 IS	sample0012_134202	8000086445	Initial	MRM+	263.20/85.00	IS		1.03	0	294370	8013	0	0	0	0	Savitzky-Golay,7,2	0.13/0.80	0.176	NBS: Internal Standard;	Peak Area	0	0	0
HIE with sampling at different times (A)	HIE-6h	ESI1	1	C6DC	sample0012_134202	8000086445	Initial	MRM+	290.20/85.00	Qualifier	C5DC\C6OH IS	0	0.06	4657	244	0	0	114850	3544	Savitzky-Golay,7,2	0.13/0.80	0.469	NBS: ISConc=-1;	Peak Area	0	0	0
HIE with sampling at different times (A)	HIE-6h	ESI1	1	C8	sample0012_134202	8000086445	Initial	MRM+	288.20/85.00	Qualifier	C8 IS	0	0.093	23454	976	0	0	266134	8059	Savitzky-Golay,7,2	0.13/0.80	0.147	NBS: ISConc=1.04; Initial: LimitLow=0, LimitHigh=0.4; Retest: LimitLow=0, LimitHigh=0.4; Recall: LimitLow=0, LimitHigh=0.4; Recall retest: LimitLow=0, LimitHigh=0.4; LC: TargetConc=0.55, Stdev=0.08; HC: TargetConc=2.76, Stdev=0.33	Peak Area	0.2	0	0.4
HIE with sampling at different times (A)	HIE-6h	ESI1	1	C8 IS	sample0012_134202	8000086445	Initial	MRM+	291.20/85.00	IS		1.04	0	266134	8059	0	0	0	0	Savitzky-Golay,7,2	0.13/0.80	0.176	NBS: Internal Standard;	Peak Area	0	0	0
HIE with sampling at different times (A)	HIE-6h	ESI1	1	C8:1	sample0012_134202	8000086445	Initial	MRM+	286.20/85.00	Qualifier	C8 IS	0	0.015	3749	255	0	0	266134	8059	Savitzky-Golay,7,2	0.13/0.80	0.352	NBS: ISConc=-1;	Peak Area	0	0	0
HIE with sampling at different times (A)	HIE-6h	ESI1	1	C10	sample0012_134202	8000086445	Initial	MRM+	316.20/85.00	Qualifier	C10 IS	0	0.2	61004	2174	0	0	333772	10079	Savitzky-Golay,7,2	0.13/0.80	0.176	NBS: ISConc=0.91; Initial: LimitLow=0, LimitHigh=0.29; Retest: LimitLow=0, LimitHigh=0.29; Recall: LimitLow=0, LimitHigh=0.29; Recall retest: LimitLow=0, LimitHigh=0.29; LC: TargetConc=0.31, Stdev=0.09; HC: TargetConc=2.02, Stdev=0.24	Peak Area	0.145	0	0.29
HIE with sampling at different times (A)	HIE-6h	ESI1	1	C10 IS	sample0012_134202	8000086445	Initial	MRM+	319.30/85.00	IS		0.91	0	333772	10079	0	0	0	0	Savitzky-Golay,7,2	0.13/0.80	0.176	NBS: Internal Standard;	Peak Area	0	0	0
HIE with sampling at different times (A)	HIE-6h	ESI1	1	C10:1	sample0012_134202	8000086445	Initial	MRM+	314.20/85.00	Qualifier	C10 IS	0	0.03	10870	448	0	0	333772	10079	Savitzky-Golay,7,2	0.13/0.80	0.147	NBS: ISConc=-1; Initial: LimitLow=0, LimitHigh=0.3; Retest: LimitLow=0, LimitHigh=0.3; Recall: LimitLow=0, LimitHigh=0.3; Recall retest: LimitLow=0, LimitHigh=0.3	Peak Area	0.15	0	0.3
HIE with sampling at different times (A)	HIE-6h	ESI1	1	C10:2	sample0012_134202	8000086445	Initial	MRM+	312.20/85.00	Qualifier	C10 IS	0	0.003	1093	69	0	0	333772	10079	Savitzky-Golay,7,2	0.13/0.80	0.147	NBS: ISConc=-1; Initial: LimitLow=0, LimitHigh=100; Retest: LimitLow=0, LimitHigh=100; Recall: LimitLow=0, LimitHigh=100; Recall retest: LimitLow=0, LimitHigh=100	Peak Area	50	0	100
HIE with sampling at different times (A)	HIE-6h	ESI1	1	C12	sample0012_134202	8000086445	Initial	MRM+	344.30/85.00	Qualifier	C12 IS	0	0.312	124501	4158	0	0	415433	11604	Savitzky-Golay,7,2	0.13/0.80	0.176	NBS: ISConc=1; Initial: LimitLow=0, LimitHigh=0.33; Retest: LimitLow=0, LimitHigh=0.33; Recall: LimitLow=0, LimitHigh=0.33; Recall retest: LimitLow=0, LimitHigh=0.33; LC: TargetConc=0.28, Stdev=0.09; HC: TargetConc=1.36, Stdev=0.16	Peak Area	0.165	0	0.33
HIE with sampling at different times (A)	HIE-6h	ESI1	1	C12 IS	sample0012_134202	8000086445	Initial	MRM+	347.30/85.00	IS		1	0	415433	11604	0	0	0	0	Savitzky-Golay,7,2	0.13/0.80	0.176	NBS: Internal Standard;	Peak Area	0	0	0
HIE with sampling at different times (A)	HIE-6h	ESI1	1	C12:1	sample0012_134202	8000086445	Initial	MRM+	342.30/85.00	Qualifier	C12 IS	0	0.02	8343	309	0	0	415433	11604	Savitzky-Golay,7,2	0.13/0.80	0.381	NBS: ISConc=-1; Initial: LimitLow=0, LimitHigh=1000; Retest: LimitLow=0, LimitHigh=1000; Recall: LimitLow=0, LimitHigh=1000; Recall retest: LimitLow=0, LimitHigh=10000	Peak Area	500	0	1000
HIE with sampling at different times (A)	HIE-6h	ESI1	1	C14	sample0012_134202	8000086445	Initial	MRM+	372.30/85.00	Qualifier	C14 IS	0	0.657	317487	8875	0	0	527317	14351	Savitzky-Golay,7,2	0.13/0.80	0.235	NBS: ISConc=1.02; Initial: LimitLow=0, LimitHigh=0.59; Retest: LimitLow=0, LimitHigh=0.59; Recall: LimitLow=0, LimitHigh=0.59; Recall retest: LimitLow=0, LimitHigh=0.59; LC: TargetConc=0.33, Stdev=0.09; HC: TargetConc=1.9, Stdev=0.23	Peak Area	0.295	0	0.59
HIE with sampling at different times (A)	HIE-6h	ESI1	1	C14 IS	sample0012_134202	8000086445	Initial	MRM+	375.30/85.00	IS		1.02	0	527317	14351	0	0	0	0	Savitzky-Golay,7,2	0.13/0.80	0.176	NBS: Internal Standard;	Peak Area	0	0	0
HIE with sampling at different times (A)	HIE-6h	ESI1	1	C14:1	sample0012_134202	8000086445	Initial	MRM+	370.30/85.00	Qualifier	C14 IS	0	0.065	33822	1434	0	0	527317	14351	Savitzky-Golay,7,2	0.13/0.80	0.147	NBS: ISConc=-1; Initial: LimitLow=0, LimitHigh=0.32; Retest: LimitLow=0, LimitHigh=0.32; Recall: LimitLow=0, LimitHigh=0.32; Recall retest: LimitLow=0, LimitHigh=0.32	Peak Area	0.16	0	0.32
HIE with sampling at different times (A)	HIE-6h	ESI1	1	C14:2	sample0012_134202	8000086445	Initial	MRM+	368.30/85.00	Qualifier	C14 IS	0	0.01	4913	227	0	0	527317	14351	Savitzky-Golay,7,2	0.13/0.80	0.176	NBS: ISConc=-1;	Peak Area	0	0	0
HIE with sampling at different times (A)	HIE-6h	ESI1	1	C14OH	sample0012_134202	8000086445	Initial	MRM+	388.30/85.00	Qualifier	C14 IS	0	0	0	0	0	0	527317	14351	Savitzky-Golay,7,2	0.13/0.80	0.763	NBS: ISConc=-1; Initial: LimitLow=0, LimitHigh=0.2; Retest: LimitLow=0, LimitHigh=0.2; Recall: LimitLow=0, LimitHigh=0.2; Recall retest: LimitLow=0, LimitHigh=0.2	Peak Area	0.1	0	0.2
HIE with sampling at different times (A)	HIE-6h	ESI1	1	C16	sample0012_134202	8000086445	Initial	MRM+	400.30/85.00	Qualifier	C16 IS	0	2.16	1154425	32611	0	0	508962	14667	Savitzky-Golay,7,2	0.13/0.80	0.176	NBS: ISConc=0.89; Initial: LimitLow=0.3, LimitHigh=8.5; Retest: LimitLow=0.3, LimitHigh=8.5; Recall: LimitLow=0.3, LimitHigh=8.5; Recall retest: LimitLow=0.3, LimitHigh=8.5; LC: TargetConc=2.02, Stdev=0.24; HC: TargetConc=11.7, Stdev=1.4	Peak Area	4.4	0.3	8.5
HIE with sampling at different times (A)	HIE-6h	ESI1	1	C16 IS	sample0012_134202	8000086445	Initial	MRM+	403.40/85.00	IS		0.89	0	508962	14667	0	0	0	0	Savitzky-Golay,7,2	0.13/0.80	0.147	NBS: Internal Standard;	Peak Area	0	0	0
HIE with sampling at different times (A)	HIE-6h	ESI1	1	C16:1	sample0012_134202	8000086445	Initial	MRM+	398.30/85.00	Qualifier	C16 IS	0	0.115	65606	1917	0	0	508962	14667	Savitzky-Golay,7,2	0.13/0.80	0.381	NBS: ISConc=-1;	Peak Area	0	0	0
HIE with sampling at different times (A)	HIE-6h	ESI1	1	C16OH	sample0012_134202	8000086445	Initial	MRM+	416.30/85.00	Qualifier	C16 IS	0	0.026	15052	511	0	0	508962	14667	Savitzky-Golay,7,2	0.13/0.80	0.176	NBS: ISConc=-1; Initial: LimitLow=0, LimitHigh=0.19; Retest: LimitLow=0, LimitHigh=0.19; Recall: LimitLow=0, LimitHigh=0.19; Recall retest: LimitLow=0, LimitHigh=0.19	Peak Area	0.095	0	0.19
HIE with sampling at different times (A)	HIE-6h	ESI1	1	C16:1OH\C17	sample0012_134202	8000086445	Initial	MRM+	414.30/85.00	Qualifier	C16 IS	0	0.065	37349	1159	0	0	508962	14667	Savitzky-Golay,7,2	0.13/0.80	0.176	NBS: ISConc=-1; Initial: LimitLow=0, LimitHigh=0.22; Retest: LimitLow=0, LimitHigh=0.22; Recall: LimitLow=0, LimitHigh=0.22; Recall retest: LimitLow=0, LimitHigh=0.22	Peak Area	0.11	0	0.22
HIE with sampling at different times (A)	HIE-6h	ESI1	1	C18	sample0012_134202	8000086445	Initial	MRM+	428.40/85.00	Qualifier	C18 IS	0	0.553	301320	8660	0	0	606024	17128	Savitzky-Golay,7,2	0.13/0.80	0.176	NBS: ISConc=0.92; Initial: LimitLow=0.13, LimitHigh=2.5; Retest: LimitLow=0.13, LimitHigh=2.5; Recall: LimitLow=0.13, LimitHigh=2.5; Recall retest: LimitLow=0.13, LimitHigh=2.5; LC: TargetConc=1.14, Stdev=0.14; HC: TargetConc=4.32, Stdev=0.52	Peak Area	1.315	0.13	2.5
HIE with sampling at different times (A)	HIE-6h	ESI1	1	C18 IS	sample0012_134202	8000086445	Initial	MRM+	431.40/85.00	IS		0.92	0	606024	17128	0	0	0	0	Savitzky-Golay,7,2	0.13/0.80	0.176	NBS: Internal Standard;	Peak Area	0	0	0
HIE with sampling at different times (A)	HIE-6h	ESI1	1	C18:1	sample0012_134202	8000086445	Initial	MRM+	426.40/85.00	Qualifier	C18 IS	0	1.062	699350	20347	0	0	606024	17128	Savitzky-Golay,7,2	0.13/0.80	0.205	NBS: ISConc=-1; Initial: LimitLow=0.15, LimitHigh=3.35; Retest: LimitLow=0.15, LimitHigh=3.35; Recall: LimitLow=0.15, LimitHigh=3.35; Recall retest: LimitLow=0.15, LimitHigh=3.35	Peak Area	1.75	0.15	3.35
HIE with sampling at different times (A)	HIE-6h	ESI1	1	C18:2	sample0012_134202	8000086445	Initial	MRM+	424.30/85.00	Qualifier	C18 IS	0	0.009	5859	203	0	0	606024	17128	Savitzky-Golay,7,2	0.13/0.80	0.411	NBS: ISConc=-1;	Peak Area	0	0	0
HIE with sampling at different times (A)	HIE-6h	ESI1	1	C18OH	sample0012_134202	8000086445	Initial	MRM+	444.40/85.00	Qualifier	C18 IS	0	0.023	15413	442	0	0	606024	17128	Savitzky-Golay,7,2	0.13/0.80	0.411	NBS: ISConc=-1; Initial: LimitLow=0, LimitHigh=0.14; Retest: LimitLow=0, LimitHigh=0.14; Recall: LimitLow=0, LimitHigh=0.14; Recall retest: LimitLow=0, LimitHigh=0.14	Peak Area	0.07	0	0.14
HIE with sampling at different times (A)	HIE-6h	ESI1	1	C18:1OH	sample0012_134202	8000086445	Initial	MRM+	442.40/85.00	Qualifier	C18 IS	0	0.051	33564	1054	0	0	606024	17128	Savitzky-Golay,7,2	0.13/0.80	0.205	NBS: ISConc=-1; Initial: LimitLow=0, LimitHigh=0.16; Retest: LimitLow=0, LimitHigh=0.16; Recall: LimitLow=0, LimitHigh=0.16; Recall retest: LimitLow=0, LimitHigh=0.16	Peak Area	0.08	0	0.16
HIE with sampling at different times (A)	HIE-6h	ESI1	1	C18:2OH	sample0012_134202	8000086445	Initial	MRM+	440.30/85.00	Qualifier	C18 IS	0	0.168	110551	3009	0	0	606024	17128	Savitzky-Golay,7,2	0.13/0.80	0.733	NBS: ISConc=-1;	Peak Area	0	0	0
HIE with sampling at different times (A)	HIE-6h	ESI1	1	C20	sample0012_134202	8000086445	Initial	MRM+	456.40/85.00	Qualifier	C26 IS	0	0.039	32982	964	0	0	918966	25578	Savitzky-Golay,7,2	0.13/0.80	0.616	NBS: ISConc=-1;	Peak Area	0	0	0
HIE with sampling at different times (A)	HIE-6h	ESI1	1	C22	sample0012_134202	8000086445	Initial	MRM+	484.40/85.00	Qualifier	C26 IS	0	0.02	17071	526	0	0	918966	25578	Savitzky-Golay,7,2	0.13/0.80	0.469	NBS: ISConc=-1;	Peak Area	0	0	0
HIE with sampling at different times (A)	HIE-6h	ESI1	1	C24	sample0012_134202	8000086445	Initial	MRM+	512.50/85.00	Qualifier	C26 IS	0	0.061	51068	1549	0	0	918966	25578	Savitzky-Golay,7,2	0.13/0.80	0.469	NBS: ISConc=-1;	Peak Area	0	0	0
HIE with sampling at different times (A)	HIE-6h	ESI1	1	C26	sample0012_134202	8000086445	Initial	MRM+	540.50/85.00	Qualifier	C26 IS	0	0.009	7016	306	0	0	918966	25578	Savitzky-Golay,7,2	0.13/0.80	0.528	NBS: ISConc=1.09; LC: TargetConc=0.61, Stdev=0.09; HC: TargetConc=1.66, Stdev=0.2	Peak Area	0	0	0
HIE with sampling at different times (A)	HIE-6h	ESI1	1	C26 IS	sample0012_134202	8000086445	Initial	MRM+	543.50/85.00	IS		1.09	0	918966	25578	0	0	0	0	Savitzky-Golay,7,2	0.13/0.80	0.176	NBS: Internal Standard;	Peak Area	0	0	0
HIE with sampling at different times (A)	HIE-6h	ESI1	1	SA	sample0012_134202	8000086445	Initial	MRM+	155.10/109.10	Qualifier	SA IS	0	0.37	10269	515	0	0	1612360	43180	Savitzky-Golay,7,2	0.13/0.80	0.352	NBS: ISConc=58.1; Initial: LimitLow=0, LimitHigh=2; Retest: LimitLow=0, LimitHigh=2; Recall: LimitLow=0, LimitHigh=2; Recall retest: LimitLow=0, LimitHigh=2; LC: TargetConc=2.57, Stdev=0.38; HC: TargetConc=10.4, Stdev=1.2	Peak Area	1	0	2
HIE with sampling at different times (A)	HIE-6h	ESI1	1	SA IS	sample0012_134202	8000086445	Initial	MRM+	160.10/114.10	IS		58.1	0	1612360	43180	0	0	0	0	Savitzky-Golay,7,2	0.13/0.80	0.205	NBS: Internal Standard;	Peak Area	0	0	0
HIE with sampling at different times (A)	HIE-6h	ESI1	1	ADO	sample0012_134202	8000086445	Initial	MRM+	268.10/136.10	Qualifier	ADO IS	0	0.349	26355	980	0	0	498859	16075	Savitzky-Golay,7,2	0.13/0.80	0.235	NBS: ISConc=9.44; LC: TargetConc=2.51, Stdev=0.34; HC: TargetConc=6.91, Stdev=0.83	Peak Area	0	0	0
HIE with sampling at different times (A)	HIE-6h	ESI1	1	ADO IS	sample0012_134202	8000086445	Initial	MRM+	273.10/136.10	IS		9.44	0	498859	16075	0	0	0	0	Savitzky-Golay,7,2	0.13/0.80	0.205	NBS: Internal Standard;	Peak Area	0	0	0
HIE with sampling at different times (A)	HIE-6h	ESI1	1	D-ADO	sample0012_134202	8000086445	Initial	MRM+	252.10/136.10	Qualifier	D-ADO IS	0	0.014	894	88	0	0	626438	20535	Savitzky-Golay,7,2	0.13/0.80	0.381	NBS: ISConc=9.82;	Peak Area	0	0	0
HIE with sampling at different times (A)	HIE-6h	ESI1	1	D-ADO IS	sample0012_134202	8000086445	Initial	MRM+	257.10/136.10	IS		9.82	0	626438	20535	0	0	0	0	Savitzky-Golay,7,2	0.13/0.80	0.205	NBS: Internal Standard;	Peak Area	0	0	0
HIE with sampling at different times (A)	HIE-6h	ESI1	1	C20:0-LPC	sample0012_134202	8000086445	Initial	MRM+	552.40/104.10	Qualifier	C26:0-LPC IS	0	3.236	187044	5326	0	0	254304	7408	Savitzky-Golay,7,2	0.13/0.80	0.147	NBS: ISConc=-1;	Peak Area	0	0	0
HIE with sampling at different times (A)	HIE-6h	ESI1	1	C22:0-LPC	sample0012_134202	8000086445	Initial	MRM+	580.40/104.10	Qualifier	C26:0-LPC IS	0	1.469	84909	2607	0	0	254304	7408	Savitzky-Golay,7,2	0.13/0.80	0.147	NBS: ISConc=-1;	Peak Area	0	0	0
HIE with sampling at different times (A)	HIE-6h	ESI1	1	C24:0-LPC	sample0012_134202	8000086445	Initial	MRM+	608.50/104.10	Qualifier	C26:0-LPC IS	0	2.275	131469	3926	0	0	254304	7408	Savitzky-Golay,7,2	0.13/0.80	0.704	NBS: ISConc=-1;	Peak Area	0	0	0
HIE with sampling at different times (A)	HIE-6h	ESI1	1	C26:0-LPC	sample0012_134202	8000086445	Initial	MRM+	636.50/104.10	Qualifier	C26:0-LPC IS	0	0.546	35050	1119	0	0	254304	7408	Savitzky-Golay,7,2	0.13/0.80	0.704	NBS: ISConc=4.4; LC: TargetConc=0.92, Stdev=0.11; HC: TargetConc=3.04, Stdev=0.36	Peak Area	0	0	0
HIE with sampling at different times (A)	HIE-6h	ESI1	1	C26:0-LPC IS	sample0012_134202	8000086445	Initial	MRM+	640.50/104.10	IS		4.4	0	254304	7408	0	0	0	0	Savitzky-Golay,7,2	0.13/0.80	0.557	NBS: Internal Standard;	Peak Area	0	0	0
HIE with sampling at different times (A)	HIE-6h	ESI1	1	ASA	sample0012_134202	8000086445	Initial	MRM+	291.10/70.10	Qualifier	Arg IS	0	1.331	26575	854	0	0	946701	25819	Savitzky-Golay,7,2	0.13/0.80	0.235	NBS: --	Peak Area	0	0	0
HIE with sampling at different times (A)	HIE-6h	ESI1	1	ASA anhydride I + II	sample0012_134202	8000086445	Initial	MRM+	273.10/70.10	Qualifier	Arg IS	0	0.417	8335	326	0	0	946701	25819	Savitzky-Golay,7,2	0.13/0.80	0.176	NBS: --	Peak Area	0	0	0
HIE with sampling at different times (A)	HIE-6h			ASATotal	sample0012_134202	8000086445	Initial	N/A	0.00/0.00	Qualifier	Arg IS	0	1.765	34910	1180	0	0	946701	25819	Savitzky-Golay,7,2	0.13/0.80	0	NBS: ISConc=-1; Initial: LimitLow=0, LimitHigh=1.5; Retest: LimitLow=0, LimitHigh=1.5; Recall: LimitLow=0, LimitHigh=1.5; Recall retest: LimitLow=0, LimitHigh=1.5; LC: TargetConc=2.22, Stdev=0.38; HC: TargetConc=39, Stdev=4.7	Peak Area	0.75	0	1.5
HIE with sampling at different times (A)	HIE-6h	ESI1	1	Ala	sample0013_134346	8000086563	Initial	MRM+	90.10/44.00	Qualifier	Ala IS	0	268.733	537135	15226	0	0	273531	7578	Savitzky-Golay,7,2	0.13/0.80	0.205	NBS: ISConc=115; Initial: LimitLow=0, LimitHigh=10000; Retest: LimitLow=0, LimitHigh=10000; Recall: LimitLow=0, LimitHigh=10000; Recall retest: LimitLow=0, LimitHigh=10000; LC: TargetConc=479, Stdev=57; HC: TargetConc=967, Stdev=116	Peak Area	5000	0	10000
HIE with sampling at different times (A)	HIE-6h	ESI1	1	Ala IS	sample0013_134346	8000086563	Initial	MRM+	93.10/47.10	IS		115	0	273531	7578	0	0	0	0	Savitzky-Golay,7,2	0.13/0.80	0.675	NBS: Internal Standard;	Peak Area	0	0	0
HIE with sampling at different times (A)	HIE-6h	ESI1	1	Arg	sample0013_134346	8000086563	Initial	MRM+	175.10/70.10	Qualifier	Arg IS	0	132.561	2496792	67745	0	0	901709	25639	Savitzky-Golay,7,2	0.13/0.80	0.528	NBS: ISConc=47.4; Initial: LimitLow=0, LimitHigh=70; Retest: LimitLow=0, LimitHigh=70; Recall: LimitLow=0, LimitHigh=70; Recall retest: LimitLow=0, LimitHigh=70; LC: TargetConc=24.2, Stdev=2.9; HC: TargetConc=136, Stdev=16	Peak Area	35	0	70
HIE with sampling at different times (A)	HIE-6h	ESI1	1	Arg IS	sample0013_134346	8000086563	Initial	MRM+	180.10/75.10	IS		47.4	0	901709	25639	0	0	0	0	Savitzky-Golay,7,2	0.13/0.80	0.205	NBS: Internal Standard;	Peak Area	0	0	0
HIE with sampling at different times (A)	HIE-6h	ESI1	1	Cit	sample0013_134346	8000086563	Initial	MRM+	176.10/113.10	Qualifier	Cit IS	0	63.2	182558	5178	0	0	267003	7536	Savitzky-Golay,7,2	0.13/0.80	0.733	NBS: ISConc=81.8; Initial: LimitLow=0, LimitHigh=80; Retest: LimitLow=0, LimitHigh=80; Recall: LimitLow=0, LimitHigh=80; Recall retest: LimitLow=0, LimitHigh=80; LC: TargetConc=33.1, Stdev=4; HC: TargetConc=147, Stdev=18	Peak Area	40	0	80
HIE with sampling at different times (A)	HIE-6h	ESI1	1	Cit IS	sample0013_134346	8000086563	Initial	MRM+	178.10/115.10	IS		81.8	0	267003	7536	0	0	0	0	Savitzky-Golay,7,2	0.13/0.80	0.44	NBS: Internal Standard;	Peak Area	0	0	0
HIE with sampling at different times (A)	HIE-6h	ESI1	1	Gln\Lys	sample0013_134346	8000086563	Initial	MRM+	147.10/84.00	Qualifier	Gln\Lys IS	0	171.865	865810	25253	0	0	450221	12405	Savitzky-Golay,7,2	0.13/0.80	0.205	NBS: ISConc=99.3; LC: TargetConc=635, Stdev=76; HC: TargetConc=1350, Stdev=160	Peak Area	0	0	0
HIE with sampling at different times (A)	HIE-6h	ESI1	1	Gln\Lys IS	sample0013_134346	8000086563	Initial	MRM+	152.10/88.10	IS		99.3	0	450221	12405	0	0	0	0	Savitzky-Golay,7,2	0.13/0.80	0.235	NBS: Internal Standard;	Peak Area	0	0	0
HIE with sampling at different times (A)	HIE-6h	ESI1	1	Glu	sample0013_134346	8000086563	Initial	MRM+	148.10/84.00	Qualifier	Gln\Lys IS	0	182.183	826008	23019	0	0	450221	12405	Savitzky-Golay,7,2	0.13/0.80	0.176	NBS: ISConc=-1;	Peak Area	0	0	0
HIE with sampling at different times (A)	HIE-6h	ESI1	1	Gly	sample0013_134346	8000086563	Initial	MRM+	76.00/30.00	Qualifier	Gly IS	0	461.112	302378	8958	0	0	391645	10709	Savitzky-Golay,7,2	0.13/0.80	0.44	NBS: ISConc=553; LC: TargetConc=549, Stdev=66; HC: TargetConc=1320, Stdev=160	Peak Area	0	0	0
HIE with sampling at different times (A)	HIE-6h	ESI1	1	Gly IS	sample0013_134346	8000086563	Initial	MRM+	78.00/32.00	IS		553	0	391645	10709	0	0	0	0	Savitzky-Golay,7,2	0.13/0.80	0.264	NBS: Internal Standard;	Peak Area	0	0	0
HIE with sampling at different times (A)	HIE-6h	ESI1	1	Leu\Ile\Pro-OH	sample0013_134346	8000086563	Initial	MRM+	132.10/86.10	Qualifier	Leu\Ile\Pro-OH IS	0	231.144	6056955	196369	0	0	2673101	82600	Savitzky-Golay,7,2	0.13/0.80	0.176	NBS: ISConc=101; Initial: LimitLow=0, LimitHigh=380; Retest: LimitLow=0, LimitHigh=380; Recall: LimitLow=0, LimitHigh=380; Recall retest: LimitLow=0, LimitHigh=380; LC: TargetConc=183, Stdev=22; HC: TargetConc=772, Stdev=93	Peak Area	190	0	380
HIE with sampling at different times (A)	HIE-6h	ESI1	1	Leu\Ile\Pro-OH IS	sample0013_134346	8000086563	Initial	MRM+	135.10/89.10	IS		101	0	2673101	82600	0	0	0	0	Savitzky-Golay,7,2	0.13/0.80	0.176	NBS: Internal Standard;	Peak Area	0	0	0
HIE with sampling at different times (A)	HIE-6h	ESI1	1	Met	sample0013_134346	8000086563	Initial	MRM+	150.10/104.10	Qualifier	Met IS	0	12.621	55231	1685	0	0	506122	15328	Savitzky-Golay,7,2	0.13/0.80	0.205	NBS: ISConc=99.7; Initial: LimitLow=7, LimitHigh=80; Retest: LimitLow=7, LimitHigh=80; Recall: LimitLow=7, LimitHigh=80; Recall retest: LimitLow=7, LimitHigh=80; LC: TargetConc=36, Stdev=4.3; HC: TargetConc=177, Stdev=21	Peak Area	43.5	7	80
HIE with sampling at different times (A)	HIE-6h	ESI1	1	Met IS	sample0013_134346	8000086563	Initial	MRM+	153.10/107.10	IS		99.7	0	506122	15328	0	0	0	0	Savitzky-Golay,7,2	0.13/0.80	0.176	NBS: Internal Standard;	Peak Area	0	0	0
HIE with sampling at different times (A)	HIE-6h	ESI1	1	Orn	sample0013_134346	8000086563	Initial	MRM+	133.10/70.10	Qualifier	Orn IS	0	22.77	132670	3970	0	0	635083	18791	Savitzky-Golay,7,2	0.13/0.80	0.176	NBS: ISConc=109; LC: TargetConc=154, Stdev=18; HC: TargetConc=488, Stdev=59	Peak Area	0	0	0
HIE with sampling at different times (A)	HIE-6h	ESI1	1	Orn IS	sample0013_134346	8000086563	Initial	MRM+	139.10/76.10	IS		109	0	635083	18791	0	0	0	0	Savitzky-Golay,7,2	0.13/0.80	0.205	NBS: Internal Standard;	Peak Area	0	0	0
HIE with sampling at different times (A)	HIE-6h	ESI1	1	Phe	sample0013_134346	8000086563	Initial	MRM+	166.10/120.10	Qualifier	Phe IS	0	75.289	2675943	81823	0	0	2756100	81045	Savitzky-Golay,7,2	0.13/0.80	0.205	NBS: ISConc=71.8; Initial: LimitLow=0, LimitHigh=120; Retest: LimitLow=0, LimitHigh=120; Recall: LimitLow=0, LimitHigh=120; Recall retest: LimitLow=0, LimitHigh=120; LC: TargetConc=79.4, Stdev=9.5; HC: TargetConc=264, Stdev=32	Peak Area	60	0	120
HIE with sampling at different times (A)	HIE-6h	ESI1	1	Phe IS	sample0013_134346	8000086563	Initial	MRM+	172.10/126.10	IS		71.8	0	2756100	81045	0	0	0	0	Savitzky-Golay,7,2	0.13/0.80	0.205	NBS: Internal Standard;	Peak Area	0	0	0
HIE with sampling at different times (A)	HIE-6h	ESI1	1	Pro	sample0013_134346	8000086563	Initial	MRM+	116.10/70.10	Qualifier	Pro IS	0	101.58	2051189	58812	0	0	1581500	46134	Savitzky-Golay,7,2	0.13/0.80	0.205	NBS: ISConc=88; LC: TargetConc=235, Stdev=28; HC: TargetConc=683, Stdev=82	Peak Area	0	0	0
HIE with sampling at different times (A)	HIE-6h	ESI1	1	Pro IS	sample0013_134346	8000086563	Initial	MRM+	121.10/74.10	IS		88	0	1581500	46134	0	0	0	0	Savitzky-Golay,7,2	0.13/0.80	0.205	NBS: Internal Standard;	Peak Area	0	0	0
HIE with sampling at different times (A)	HIE-6h	ESI1	1	Tyr	sample0013_134346	8000086563	Initial	MRM+	182.10/136.10	Qualifier	Tyr IS	0	99.798	699249	21033	0	0	989691	28368	Savitzky-Golay,7,2	0.13/0.80	0.205	NBS: ISConc=113; LC: TargetConc=136, Stdev=16; HC: TargetConc=549, Stdev=66	Peak Area	0	0	0
HIE with sampling at different times (A)	HIE-6h	ESI1	1	Tyr IS	sample0013_134346	8000086563	Initial	MRM+	188.10/142.10	IS		113	0	989691	28368	0	0	0	0	Savitzky-Golay,7,2	0.13/0.80	0.205	NBS: Internal Standard;	Peak Area	0	0	0
HIE with sampling at different times (A)	HIE-6h	ESI1	1	Val	sample0013_134346	8000086563	Initial	MRM+	118.10/72.10	Qualifier	Val IS	0	148.907	2244575	72332	0	0	1823308	55350	Savitzky-Golay,7,2	0.13/0.80	0.176	NBS: ISConc=108; LC: TargetConc=213, Stdev=26; HC: TargetConc=470, Stdev=56	Peak Area	0	0	0
HIE with sampling at different times (A)	HIE-6h	ESI1	1	Val IS	sample0013_134346	8000086563	Initial	MRM+	124.10/77.10	IS		108	0	1823308	55350	0	0	0	0	Savitzky-Golay,7,2	0.13/0.80	0.205	NBS: Internal Standard;	Peak Area	0	0	0
HIE with sampling at different times (A)	HIE-6h	ESI1	1	C0	sample0013_134346	8000086563	Initial	MRM+	162.10/103.00	Qualifier	C0 IS	0	23.304	624634	17872	0	0	394548	10998	Savitzky-Golay,7,2	0.13/0.80	0.469	NBS: ISConc=11.5; Initial: LimitLow=8, LimitHigh=90; Retest: LimitLow=8, LimitHigh=90; Recall: LimitLow=8, LimitHigh=90; Recall retest: LimitLow=8, LimitHigh=90; LC: TargetConc=41, Stdev=4.9; HC: TargetConc=151, Stdev=18	Peak Area	49	8	90
HIE with sampling at different times (A)	HIE-6h	ESI1	1	C0 IS	sample0013_134346	8000086563	Initial	MRM+	171.20/103.00	IS		11.5	0	394548	10998	0	0	0	0	Savitzky-Golay,7,2	0.13/0.80	0.557	NBS: Internal Standard;	Peak Area	0	0	0
HIE with sampling at different times (A)	HIE-6h	ESI1	1	C2	sample0013_134346	8000086563	Initial	MRM+	204.10/85.00	Qualifier	C2 IS	0	7.245	1147844	32012	0	0	832996	23263	Savitzky-Golay,7,2	0.13/0.80	0.499	NBS: ISConc=4.78; Initial: LimitLow=0, LimitHigh=115; Retest: LimitLow=0, LimitHigh=115; Recall: LimitLow=0, LimitHigh=115; Recall retest: LimitLow=0, LimitHigh=115; LC: TargetConc=27.6, Stdev=3.3; HC: TargetConc=82.4, Stdev=9.9	Peak Area	57.5	0	115
HIE with sampling at different times (A)	HIE-6h	ESI1	1	C2 IS	sample0013_134346	8000086563	Initial	MRM+	207.10/85.00	IS		4.78	0	832996	23263	0	0	0	0	Savitzky-Golay,7,2	0.13/0.80	0.733	NBS: Internal Standard;	Peak Area	0	0	0
HIE with sampling at different times (A)	HIE-6h	ESI1	1	C3	sample0013_134346	8000086563	Initial	MRM+	218.10/85.00	Qualifier	C3 IS	0	0.339	64186	1696	0	0	384291	10535	Savitzky-Golay,7,2	0.13/0.80	0.763	NBS: ISConc=2.03; Initial: LimitLow=0, LimitHigh=6.8; Retest: LimitLow=0, LimitHigh=6.8; Recall: LimitLow=0, LimitHigh=6.8; Recall retest: LimitLow=0, LimitHigh=6.8; LC: TargetConc=4.63, Stdev=0.56; HC: TargetConc=13.3, Stdev=1.6	Peak Area	3.4	0	6.8
HIE with sampling at different times (A)	HIE-6h	ESI1	1	C3 IS	sample0013_134346	8000086563	Initial	MRM+	221.20/85.00	IS		2.03	0	384291	10535	0	0	0	0	Savitzky-Golay,7,2	0.13/0.80	0.557	NBS: Internal Standard;	Peak Area	0	0	0
HIE with sampling at different times (A)	HIE-6h	ESI1	1	C3DC\C4OH	sample0013_134346	8000086563	Initial	MRM+	248.10/85.00	Qualifier	C4 IS	0	0.247	56772	1588	0	0	333309	9333	Savitzky-Golay,7,2	0.13/0.80	0.499	NBS: ISConc=-1; Initial: LimitLow=0, LimitHigh=10; Retest: LimitLow=0.04, LimitHigh=10; Recall: LimitLow=0.04, LimitHigh=10; Recall retest: LimitLow=0.04, LimitHigh=10	Peak Area	5	0	10
HIE with sampling at different times (A)	HIE-6h	ESI1	1	C4	sample0013_134346	8000086563	Initial	MRM+	232.20/85.00	Qualifier	C4 IS	0	0.057	12995	625	0	0	333309	9333	Savitzky-Golay,7,2	0.13/0.80	0.176	NBS: ISConc=1.45; Initial: LimitLow=0, LimitHigh=1.5; Retest: LimitLow=0, LimitHigh=1.5; Recall: LimitLow=0, LimitHigh=1.5; Recall retest: LimitLow=0, LimitHigh=1.5; LC: TargetConc=0.74, Stdev=0.1; HC: TargetConc=2.74, Stdev=0.33	Peak Area	0.75	0	1.5
HIE with sampling at different times (A)	HIE-6h	ESI1	1	C4 IS	sample0013_134346	8000086563	Initial	MRM+	235.20/85.00	IS		1.45	0	333309	9333	0	0	0	0	Savitzky-Golay,7,2	0.13/0.80	0.469	NBS: Internal Standard;	Peak Area	0	0	0
HIE with sampling at different times (A)	HIE-6h	ESI1	1	C4DC\C5OH	sample0013_134346	8000086563	Initial	MRM+	262.20/85.00	Qualifier	C5 IS	0	0.037	9422	356	0	0	388016	10854	Savitzky-Golay,7,2	0.13/0.80	0.557	NBS: ISConc=-1; Initial: LimitLow=0, LimitHigh=0.5; Retest: LimitLow=0, LimitHigh=0.5; Recall: LimitLow=0, LimitHigh=0.5; Recall retest: LimitLow=0, LimitHigh=0.5	Peak Area	0.25	0	0.5
HIE with sampling at different times (A)	HIE-6h	ESI1	1	C5	sample0013_134346	8000086563	Initial	MRM+	246.20/85.00	Qualifier	C5 IS	0	0.045	11983	451	0	0	388016	10854	Savitzky-Golay,7,2	0.13/0.80	0.235	NBS: ISConc=1.52; Initial: LimitLow=0, LimitHigh=0.56; Retest: LimitLow=0, LimitHigh=0.56; Recall: LimitLow=0, LimitHigh=0.56; Recall retest: LimitLow=0, LimitHigh=0.56; LC: TargetConc=0.63, Stdev=0.08; HC: TargetConc=2.46, Stdev=0.3	Peak Area	0.28	0	0.56
HIE with sampling at different times (A)	HIE-6h	ESI1	1	C5 IS	sample0013_134346	8000086563	Initial	MRM+	255.20/85.00	IS		1.52	0	388016	10854	0	0	0	0	Savitzky-Golay,7,2	0.13/0.80	0.235	NBS: Internal Standard;	Peak Area	0	0	0
HIE with sampling at different times (A)	HIE-6h	ESI1	1	C5:1	sample0013_134346	8000086563	Initial	MRM+	244.20/85.00	Qualifier	C5 IS	0	0.027	6792	310	0	0	388016	10854	Savitzky-Golay,7,2	0.13/0.80	0.499	NBS: ISConc=-1; Initial: LimitLow=0, LimitHigh=0.15; Retest: LimitLow=0, LimitHigh=0.15; Recall: LimitLow=0, LimitHigh=0.15; Recall retest: LimitLow=0, LimitHigh=0.15	Peak Area	0.075	0	0.15
HIE with sampling at different times (A)	HIE-6h	ESI1	1	C5DC\C6OH	sample0013_134346	8000086563	Initial	MRM+	276.20/85.00	Qualifier	C5DC\C6OH IS	0	0.053	4006	153	0	0	113091	3305	Savitzky-Golay,7,2	0.13/0.80	0.528	NBS: ISConc=1.49; Initial: LimitLow=0, LimitHigh=0.3; Retest: LimitLow=0, LimitHigh=0.3; Recall: LimitLow=0, LimitHigh=0.3; Recall retest: LimitLow=0, LimitHigh=0.3; LC: TargetConc=0.39, Stdev=0.09; HC: TargetConc=1.98, Stdev=0.24	Peak Area	0.15	0	0.3
HIE with sampling at different times (A)	HIE-6h	ESI1	1	C5DC\C6OH IS	sample0013_134346	8000086563	Initial	MRM+	282.20/85.00	IS		1.49	0	113091	3305	0	0	0	0	Savitzky-Golay,7,2	0.13/0.80	0.352	NBS: Internal Standard;	Peak Area	0	0	0
HIE with sampling at different times (A)	HIE-6h	ESI1	1	C6	sample0013_134346	8000086563	Initial	MRM+	260.20/85.00	Qualifier	C6 IS	0	0.004	1123	84	0	0	290949	7984	Savitzky-Golay,7,2	0.13/0.80	0.147	NBS: ISConc=1.03; Initial: LimitLow=0, LimitHigh=0.2; Retest: LimitLow=0, LimitHigh=0.2; Recall: LimitLow=0, LimitHigh=0.2; Recall retest: LimitLow=0, LimitHigh=0.2; LC: TargetConc=0.29, Stdev=0.09; HC: TargetConc=1.4, Stdev=0.17	Peak Area	0.1	0	0.2
HIE with sampling at different times (A)	HIE-6h	ESI1	1	C6 IS	sample0013_134346	8000086563	Initial	MRM+	263.20/85.00	IS		1.03	0	290949	7984	0	0	0	0	Savitzky-Golay,7,2	0.13/0.80	0.205	NBS: Internal Standard;	Peak Area	0	0	0
HIE with sampling at different times (A)	HIE-6h	ESI1	1	C6DC	sample0013_134346	8000086563	Initial	MRM+	290.20/85.00	Qualifier	C5DC\C6OH IS	0	0.041	3088	142	0	0	113091	3305	Savitzky-Golay,7,2	0.13/0.80	0.176	NBS: ISConc=-1;	Peak Area	0	0	0
HIE with sampling at different times (A)	HIE-6h	ESI1	1	C8	sample0013_134346	8000086563	Initial	MRM+	288.20/85.00	Qualifier	C8 IS	0	0.075	19960	729	0	0	281238	8970	Savitzky-Golay,7,2	0.13/0.80	0.733	NBS: ISConc=1.04; Initial: LimitLow=0, LimitHigh=0.4; Retest: LimitLow=0, LimitHigh=0.4; Recall: LimitLow=0, LimitHigh=0.4; Recall retest: LimitLow=0, LimitHigh=0.4; LC: TargetConc=0.55, Stdev=0.08; HC: TargetConc=2.76, Stdev=0.33	Peak Area	0.2	0	0.4
HIE with sampling at different times (A)	HIE-6h	ESI1	1	C8 IS	sample0013_134346	8000086563	Initial	MRM+	291.20/85.00	IS		1.04	0	281238	8970	0	0	0	0	Savitzky-Golay,7,2	0.13/0.80	0.205	NBS: Internal Standard;	Peak Area	0	0	0
HIE with sampling at different times (A)	HIE-6h	ESI1	1	C8:1	sample0013_134346	8000086563	Initial	MRM+	286.20/85.00	Qualifier	C8 IS	0	0.013	3570	160	0	0	281238	8970	Savitzky-Golay,7,2	0.13/0.80	0.645	NBS: ISConc=-1;	Peak Area	0	0	0
HIE with sampling at different times (A)	HIE-6h	ESI1	1	C10	sample0013_134346	8000086563	Initial	MRM+	316.20/85.00	Qualifier	C10 IS	0	0.149	44443	1541	0	0	325740	10297	Savitzky-Golay,7,2	0.13/0.80	0.205	NBS: ISConc=0.91; Initial: LimitLow=0, LimitHigh=0.29; Retest: LimitLow=0, LimitHigh=0.29; Recall: LimitLow=0, LimitHigh=0.29; Recall retest: LimitLow=0, LimitHigh=0.29; LC: TargetConc=0.31, Stdev=0.09; HC: TargetConc=2.02, Stdev=0.24	Peak Area	0.145	0	0.29
HIE with sampling at different times (A)	HIE-6h	ESI1	1	C10 IS	sample0013_134346	8000086563	Initial	MRM+	319.30/85.00	IS		0.91	0	325740	10297	0	0	0	0	Savitzky-Golay,7,2	0.13/0.80	0.176	NBS: Internal Standard;	Peak Area	0	0	0
HIE with sampling at different times (A)	HIE-6h	ESI1	1	C10:1	sample0013_134346	8000086563	Initial	MRM+	314.20/85.00	Qualifier	C10 IS	0	0.038	13563	629	0	0	325740	10297	Savitzky-Golay,7,2	0.13/0.80	0.293	NBS: ISConc=-1; Initial: LimitLow=0, LimitHigh=0.3; Retest: LimitLow=0, LimitHigh=0.3; Recall: LimitLow=0, LimitHigh=0.3; Recall retest: LimitLow=0, LimitHigh=0.3	Peak Area	0.15	0	0.3
HIE with sampling at different times (A)	HIE-6h	ESI1	1	C10:2	sample0013_134346	8000086563	Initial	MRM+	312.20/85.00	Qualifier	C10 IS	0	0.005	1727	76	0	0	325740	10297	Savitzky-Golay,7,2	0.13/0.80	0.352	NBS: ISConc=-1; Initial: LimitLow=0, LimitHigh=100; Retest: LimitLow=0, LimitHigh=100; Recall: LimitLow=0, LimitHigh=100; Recall retest: LimitLow=0, LimitHigh=100	Peak Area	50	0	100
HIE with sampling at different times (A)	HIE-6h	ESI1	1	C12	sample0013_134346	8000086563	Initial	MRM+	344.30/85.00	Qualifier	C12 IS	0	0.279	109482	3745	0	0	408499	12545	Savitzky-Golay,7,2	0.13/0.80	0.176	NBS: ISConc=1; Initial: LimitLow=0, LimitHigh=0.33; Retest: LimitLow=0, LimitHigh=0.33; Recall: LimitLow=0, LimitHigh=0.33; Recall retest: LimitLow=0, LimitHigh=0.33; LC: TargetConc=0.28, Stdev=0.09; HC: TargetConc=1.36, Stdev=0.16	Peak Area	0.165	0	0.33
HIE with sampling at different times (A)	HIE-6h	ESI1	1	C12 IS	sample0013_134346	8000086563	Initial	MRM+	347.30/85.00	IS		1	0	408499	12545	0	0	0	0	Savitzky-Golay,7,2	0.13/0.80	0.176	NBS: Internal Standard;	Peak Area	0	0	0
HIE with sampling at different times (A)	HIE-6h	ESI1	1	C12:1	sample0013_134346	8000086563	Initial	MRM+	342.30/85.00	Qualifier	C12 IS	0	0.018	7175	288	0	0	408499	12545	Savitzky-Golay,7,2	0.13/0.80	0.616	NBS: ISConc=-1; Initial: LimitLow=0, LimitHigh=1000; Retest: LimitLow=0, LimitHigh=1000; Recall: LimitLow=0, LimitHigh=1000; Recall retest: LimitLow=0, LimitHigh=10000	Peak Area	500	0	1000
HIE with sampling at different times (A)	HIE-6h	ESI1	1	C14	sample0013_134346	8000086563	Initial	MRM+	372.30/85.00	Qualifier	C14 IS	0	0.57	285146	7969	0	0	546228	16425	Savitzky-Golay,7,2	0.13/0.80	0.381	NBS: ISConc=1.02; Initial: LimitLow=0, LimitHigh=0.59; Retest: LimitLow=0, LimitHigh=0.59; Recall: LimitLow=0, LimitHigh=0.59; Recall retest: LimitLow=0, LimitHigh=0.59; LC: TargetConc=0.33, Stdev=0.09; HC: TargetConc=1.9, Stdev=0.23	Peak Area	0.295	0	0.59
HIE with sampling at different times (A)	HIE-6h	ESI1	1	C14 IS	sample0013_134346	8000086563	Initial	MRM+	375.30/85.00	IS		1.02	0	546228	16425	0	0	0	0	Savitzky-Golay,7,2	0.13/0.80	0.176	NBS: Internal Standard;	Peak Area	0	0	0
HIE with sampling at different times (A)	HIE-6h	ESI1	1	C14:1	sample0013_134346	8000086563	Initial	MRM+	370.30/85.00	Qualifier	C14 IS	0	0.074	39460	1233	0	0	546228	16425	Savitzky-Golay,7,2	0.13/0.80	0.528	NBS: ISConc=-1; Initial: LimitLow=0, LimitHigh=0.32; Retest: LimitLow=0, LimitHigh=0.32; Recall: LimitLow=0, LimitHigh=0.32; Recall retest: LimitLow=0, LimitHigh=0.32	Peak Area	0.16	0	0.32
HIE with sampling at different times (A)	HIE-6h	ESI1	1	C14:2	sample0013_134346	8000086563	Initial	MRM+	368.30/85.00	Qualifier	C14 IS	0	0.007	3661	180	0	0	546228	16425	Savitzky-Golay,7,2	0.13/0.80	0.587	NBS: ISConc=-1;	Peak Area	0	0	0
HIE with sampling at different times (A)	HIE-6h	ESI1	1	C14OH	sample0013_134346	8000086563	Initial	MRM+	388.30/85.00	Qualifier	C14 IS	0	0	0	0	0	0	546228	16425	Savitzky-Golay,7,2	0.13/0.80	0.763	NBS: ISConc=-1; Initial: LimitLow=0, LimitHigh=0.2; Retest: LimitLow=0, LimitHigh=0.2; Recall: LimitLow=0, LimitHigh=0.2; Recall retest: LimitLow=0, LimitHigh=0.2	Peak Area	0.1	0	0.2
HIE with sampling at different times (A)	HIE-6h	ESI1	1	C16	sample0013_134346	8000086563	Initial	MRM+	400.30/85.00	Qualifier	C16 IS	0	2.38	1323865	37941	0	0	529629	15405	Savitzky-Golay,7,2	0.13/0.80	0.176	NBS: ISConc=0.89; Initial: LimitLow=0.3, LimitHigh=8.5; Retest: LimitLow=0.3, LimitHigh=8.5; Recall: LimitLow=0.3, LimitHigh=8.5; Recall retest: LimitLow=0.3, LimitHigh=8.5; LC: TargetConc=2.02, Stdev=0.24; HC: TargetConc=11.7, Stdev=1.4	Peak Area	4.4	0.3	8.5
HIE with sampling at different times (A)	HIE-6h	ESI1	1	C16 IS	sample0013_134346	8000086563	Initial	MRM+	403.40/85.00	IS		0.89	0	529629	15405	0	0	0	0	Savitzky-Golay,7,2	0.13/0.80	0.176	NBS: Internal Standard;	Peak Area	0	0	0
HIE with sampling at different times (A)	HIE-6h	ESI1	1	C16:1	sample0013_134346	8000086563	Initial	MRM+	398.30/85.00	Qualifier	C16 IS	0	0.118	69968	2193	0	0	529629	15405	Savitzky-Golay,7,2	0.13/0.80	0.205	NBS: ISConc=-1;	Peak Area	0	0	0
HIE with sampling at different times (A)	HIE-6h	ESI1	1	C16OH	sample0013_134346	8000086563	Initial	MRM+	416.30/85.00	Qualifier	C16 IS	0	0.03	17776	681	0	0	529629	15405	Savitzky-Golay,7,2	0.13/0.80	0.264	NBS: ISConc=-1; Initial: LimitLow=0, LimitHigh=0.19; Retest: LimitLow=0, LimitHigh=0.19; Recall: LimitLow=0, LimitHigh=0.19; Recall retest: LimitLow=0, LimitHigh=0.19	Peak Area	0.095	0	0.19
HIE with sampling at different times (A)	HIE-6h	ESI1	1	C16:1OH\C17	sample0013_134346	8000086563	Initial	MRM+	414.30/85.00	Qualifier	C16 IS	0	0.08	47390	1549	0	0	529629	15405	Savitzky-Golay,7,2	0.13/0.80	0.176	NBS: ISConc=-1; Initial: LimitLow=0, LimitHigh=0.22; Retest: LimitLow=0, LimitHigh=0.22; Recall: LimitLow=0, LimitHigh=0.22; Recall retest: LimitLow=0, LimitHigh=0.22	Peak Area	0.11	0	0.22
HIE with sampling at different times (A)	HIE-6h	ESI1	1	C18	sample0013_134346	8000086563	Initial	MRM+	428.40/85.00	Qualifier	C18 IS	0	0.613	356816	11077	0	0	648266	17293	Savitzky-Golay,7,2	0.13/0.80	0.176	NBS: ISConc=0.92; Initial: LimitLow=0.13, LimitHigh=2.5; Retest: LimitLow=0.13, LimitHigh=2.5; Recall: LimitLow=0.13, LimitHigh=2.5; Recall retest: LimitLow=0.13, LimitHigh=2.5; LC: TargetConc=1.14, Stdev=0.14; HC: TargetConc=4.32, Stdev=0.52	Peak Area	1.315	0.13	2.5
HIE with sampling at different times (A)	HIE-6h	ESI1	1	C18 IS	sample0013_134346	8000086563	Initial	MRM+	431.40/85.00	IS		0.92	0	648266	17293	0	0	0	0	Savitzky-Golay,7,2	0.13/0.80	0.293	NBS: Internal Standard;	Peak Area	0	0	0
HIE with sampling at different times (A)	HIE-6h	ESI1	1	C18:1	sample0013_134346	8000086563	Initial	MRM+	426.40/85.00	Qualifier	C18 IS	0	1.121	789958	21415	0	0	648266	17293	Savitzky-Golay,7,2	0.13/0.80	0.176	NBS: ISConc=-1; Initial: LimitLow=0.15, LimitHigh=3.35; Retest: LimitLow=0.15, LimitHigh=3.35; Recall: LimitLow=0.15, LimitHigh=3.35; Recall retest: LimitLow=0.15, LimitHigh=3.35	Peak Area	1.75	0.15	3.35
HIE with sampling at different times (A)	HIE-6h	ESI1	1	C18:2	sample0013_134346	8000086563	Initial	MRM+	424.30/85.00	Qualifier	C18 IS	0	0.009	6676	306	0	0	648266	17293	Savitzky-Golay,7,2	0.13/0.80	0.323	NBS: ISConc=-1;	Peak Area	0	0	0
HIE with sampling at different times (A)	HIE-6h	ESI1	1	C18OH	sample0013_134346	8000086563	Initial	MRM+	444.40/85.00	Qualifier	C18 IS	0	0.02	13832	525	0	0	648266	17293	Savitzky-Golay,7,2	0.13/0.80	0.264	NBS: ISConc=-1; Initial: LimitLow=0, LimitHigh=0.14; Retest: LimitLow=0, LimitHigh=0.14; Recall: LimitLow=0, LimitHigh=0.14; Recall retest: LimitLow=0, LimitHigh=0.14	Peak Area	0.07	0	0.14
HIE with sampling at different times (A)	HIE-6h	ESI1	1	C18:1OH	sample0013_134346	8000086563	Initial	MRM+	442.40/85.00	Qualifier	C18 IS	0	0.054	37744	1140	0	0	648266	17293	Savitzky-Golay,7,2	0.13/0.80	0.411	NBS: ISConc=-1; Initial: LimitLow=0, LimitHigh=0.16; Retest: LimitLow=0, LimitHigh=0.16; Recall: LimitLow=0, LimitHigh=0.16; Recall retest: LimitLow=0, LimitHigh=0.16	Peak Area	0.08	0	0.16
HIE with sampling at different times (A)	HIE-6h	ESI1	1	C18:2OH	sample0013_134346	8000086563	Initial	MRM+	440.30/85.00	Qualifier	C18 IS	0	0.103	72483	2228	0	0	648266	17293	Savitzky-Golay,7,2	0.13/0.80	0.411	NBS: ISConc=-1;	Peak Area	0	0	0
HIE with sampling at different times (A)	HIE-6h	ESI1	1	C20	sample0013_134346	8000086563	Initial	MRM+	456.40/85.00	Qualifier	C26 IS	0	0.033	30238	899	0	0	1005404	26933	Savitzky-Golay,7,2	0.13/0.80	0.733	NBS: ISConc=-1;	Peak Area	0	0	0
HIE with sampling at different times (A)	HIE-6h	ESI1	1	C22	sample0013_134346	8000086563	Initial	MRM+	484.40/85.00	Qualifier	C26 IS	0	0.015	13459	463	0	0	1005404	26933	Savitzky-Golay,7,2	0.13/0.80	0.235	NBS: ISConc=-1;	Peak Area	0	0	0
HIE with sampling at different times (A)	HIE-6h	ESI1	1	C24	sample0013_134346	8000086563	Initial	MRM+	512.50/85.00	Qualifier	C26 IS	0	0.044	40939	1319	0	0	1005404	26933	Savitzky-Golay,7,2	0.13/0.80	0.411	NBS: ISConc=-1;	Peak Area	0	0	0
HIE with sampling at different times (A)	HIE-6h	ESI1	1	C26	sample0013_134346	8000086563	Initial	MRM+	540.50/85.00	Qualifier	C26 IS	0	0.005	3912	190	0	0	1005404	26933	Savitzky-Golay,7,2	0.13/0.80	0.557	NBS: ISConc=1.09; LC: TargetConc=0.61, Stdev=0.09; HC: TargetConc=1.66, Stdev=0.2	Peak Area	0	0	0
HIE with sampling at different times (A)	HIE-6h	ESI1	1	C26 IS	sample0013_134346	8000086563	Initial	MRM+	543.50/85.00	IS		1.09	0	1005404	26933	0	0	0	0	Savitzky-Golay,7,2	0.13/0.80	0.733	NBS: Internal Standard;	Peak Area	0	0	0
HIE with sampling at different times (A)	HIE-6h	ESI1	1	SA	sample0013_134346	8000086563	Initial	MRM+	155.10/109.10	Qualifier	SA IS	0	0.435	11604	395	0	0	1550203	42665	Savitzky-Golay,7,2	0.13/0.80	0.147	NBS: ISConc=58.1; Initial: LimitLow=0, LimitHigh=2; Retest: LimitLow=0, LimitHigh=2; Recall: LimitLow=0, LimitHigh=2; Recall retest: LimitLow=0, LimitHigh=2; LC: TargetConc=2.57, Stdev=0.38; HC: TargetConc=10.4, Stdev=1.2	Peak Area	1	0	2
HIE with sampling at different times (A)	HIE-6h	ESI1	1	SA IS	sample0013_134346	8000086563	Initial	MRM+	160.10/114.10	IS		58.1	0	1550203	42665	0	0	0	0	Savitzky-Golay,7,2	0.13/0.80	0.205	NBS: Internal Standard;	Peak Area	0	0	0
HIE with sampling at different times (A)	HIE-6h	ESI1	1	ADO	sample0013_134346	8000086563	Initial	MRM+	268.10/136.10	Qualifier	ADO IS	0	0.445	33640	1000	0	0	499963	15992	Savitzky-Golay,7,2	0.13/0.80	0.616	NBS: ISConc=9.44; LC: TargetConc=2.51, Stdev=0.34; HC: TargetConc=6.91, Stdev=0.83	Peak Area	0	0	0
HIE with sampling at different times (A)	HIE-6h	ESI1	1	ADO IS	sample0013_134346	8000086563	Initial	MRM+	273.10/136.10	IS		9.44	0	499963	15992	0	0	0	0	Savitzky-Golay,7,2	0.13/0.80	0.176	NBS: Internal Standard;	Peak Area	0	0	0
HIE with sampling at different times (A)	HIE-6h	ESI1	1	D-ADO	sample0013_134346	8000086563	Initial	MRM+	252.10/136.10	Qualifier	D-ADO IS	0	0.019	1156	50	0	0	597470	17612	Savitzky-Golay,7,2	0.13/0.80	0.235	NBS: ISConc=9.82;	Peak Area	0	0	0
HIE with sampling at different times (A)	HIE-6h	ESI1	1	D-ADO IS	sample0013_134346	8000086563	Initial	MRM+	257.10/136.10	IS		9.82	0	597470	17612	0	0	0	0	Savitzky-Golay,7,2	0.13/0.80	0.176	NBS: Internal Standard;	Peak Area	0	0	0
HIE with sampling at different times (A)	HIE-6h	ESI1	1	C20:0-LPC	sample0013_134346	8000086563	Initial	MRM+	552.40/104.10	Qualifier	C26:0-LPC IS	0	1.662	100523	2827	0	0	266144	7784	Savitzky-Golay,7,2	0.13/0.80	0.176	NBS: ISConc=-1;	Peak Area	0	0	0
HIE with sampling at different times (A)	HIE-6h	ESI1	1	C22:0-LPC	sample0013_134346	8000086563	Initial	MRM+	580.40/104.10	Qualifier	C26:0-LPC IS	0	1.189	71929	2531	0	0	266144	7784	Savitzky-Golay,7,2	0.13/0.80	0.587	NBS: ISConc=-1;	Peak Area	0	0	0
HIE with sampling at different times (A)	HIE-6h	ESI1	1	C24:0-LPC	sample0013_134346	8000086563	Initial	MRM+	608.50/104.10	Qualifier	C26:0-LPC IS	0	1.927	116568	3250	0	0	266144	7784	Savitzky-Golay,7,2	0.13/0.80	0.469	NBS: ISConc=-1;	Peak Area	0	0	0
HIE with sampling at different times (A)	HIE-6h	ESI1	1	C26:0-LPC	sample0013_134346	8000086563	Initial	MRM+	636.50/104.10	Qualifier	C26:0-LPC IS	0	0.432	29026	1000	0	0	266144	7784	Savitzky-Golay,7,2	0.13/0.80	0.675	NBS: ISConc=4.4; LC: TargetConc=0.92, Stdev=0.11; HC: TargetConc=3.04, Stdev=0.36	Peak Area	0	0	0
HIE with sampling at different times (A)	HIE-6h	ESI1	1	C26:0-LPC IS	sample0013_134346	8000086563	Initial	MRM+	640.50/104.10	IS		4.4	0	266144	7784	0	0	0	0	Savitzky-Golay,7,2	0.13/0.80	0.381	NBS: Internal Standard;	Peak Area	0	0	0
HIE with sampling at different times (A)	HIE-6h	ESI1	1	ASA	sample0013_134346	8000086563	Initial	MRM+	291.10/70.10	Qualifier	Arg IS	0	1.832	34858	1495	0	0	901709	25639	Savitzky-Golay,7,2	0.13/0.80	0.235	NBS: --	Peak Area	0	0	0
HIE with sampling at different times (A)	HIE-6h	ESI1	1	ASA anhydride I + II	sample0013_134346	8000086563	Initial	MRM+	273.10/70.10	Qualifier	Arg IS	0	0.409	7782	325	0	0	901709	25639	Savitzky-Golay,7,2	0.13/0.80	0.411	NBS: --	Peak Area	0	0	0
HIE with sampling at different times (A)	HIE-6h			ASATotal	sample0013_134346	8000086563	Initial	N/A	0.00/0.00	Qualifier	Arg IS	0	2.264	42640	1820	0	0	901709	25639	Savitzky-Golay,7,2	0.13/0.80	0	NBS: ISConc=-1; Initial: LimitLow=0, LimitHigh=1.5; Retest: LimitLow=0, LimitHigh=1.5; Recall: LimitLow=0, LimitHigh=1.5; Recall retest: LimitLow=0, LimitHigh=1.5; LC: TargetConc=2.22, Stdev=0.38; HC: TargetConc=39, Stdev=4.7	Peak Area	0.75	0	1.5
HIE with sampling at different times (A)	HIE-6h	ESI1	1	Ala	sample0014_134530	8000086560	Initial	MRM+	90.10/44.00	Qualifier	Ala IS	0	310.618	658464	20108	0	0	290102	8769	Savitzky-Golay,7,2	0.13/0.80	0.176	NBS: ISConc=115; Initial: LimitLow=0, LimitHigh=10000; Retest: LimitLow=0, LimitHigh=10000; Recall: LimitLow=0, LimitHigh=10000; Recall retest: LimitLow=0, LimitHigh=10000; LC: TargetConc=479, Stdev=57; HC: TargetConc=967, Stdev=116	Peak Area	5000	0	10000
HIE with sampling at different times (A)	HIE-6h	ESI1	1	Ala IS	sample0014_134530	8000086560	Initial	MRM+	93.10/47.10	IS		115	0	290102	8769	0	0	0	0	Savitzky-Golay,7,2	0.13/0.80	0.205	NBS: Internal Standard;	Peak Area	0	0	0
HIE with sampling at different times (A)	HIE-6h	ESI1	1	Arg	sample0014_134530	8000086560	Initial	MRM+	175.10/70.10	Qualifier	Arg IS	0	120.852	2519556	69131	0	0	998090	26295	Savitzky-Golay,7,2	0.13/0.80	0.205	NBS: ISConc=47.4; Initial: LimitLow=0, LimitHigh=70; Retest: LimitLow=0, LimitHigh=70; Recall: LimitLow=0, LimitHigh=70; Recall retest: LimitLow=0, LimitHigh=70; LC: TargetConc=24.2, Stdev=2.9; HC: TargetConc=136, Stdev=16	Peak Area	35	0	70
HIE with sampling at different times (A)	HIE-6h	ESI1	1	Arg IS	sample0014_134530	8000086560	Initial	MRM+	180.10/75.10	IS		47.4	0	998090	26295	0	0	0	0	Savitzky-Golay,7,2	0.13/0.80	0.205	NBS: Internal Standard;	Peak Area	0	0	0
HIE with sampling at different times (A)	HIE-6h	ESI1	1	Cit	sample0014_134530	8000086560	Initial	MRM+	176.10/113.10	Qualifier	Cit IS	0	63.324	175695	4998	0	0	256463	7046	Savitzky-Golay,7,2	0.13/0.80	0.704	NBS: ISConc=81.8; Initial: LimitLow=0, LimitHigh=80; Retest: LimitLow=0, LimitHigh=80; Recall: LimitLow=0, LimitHigh=80; Recall retest: LimitLow=0, LimitHigh=80; LC: TargetConc=33.1, Stdev=4; HC: TargetConc=147, Stdev=18	Peak Area	40	0	80
HIE with sampling at different times (A)	HIE-6h	ESI1	1	Cit IS	sample0014_134530	8000086560	Initial	MRM+	178.10/115.10	IS		81.8	0	256463	7046	0	0	0	0	Savitzky-Golay,7,2	0.13/0.80	0.205	NBS: Internal Standard;	Peak Area	0	0	0
HIE with sampling at different times (A)	HIE-6h	ESI1	1	Gln\Lys	sample0014_134530	8000086560	Initial	MRM+	147.10/84.00	Qualifier	Gln\Lys IS	0	172.969	886626	25264	0	0	458104	12126	Savitzky-Golay,7,2	0.13/0.80	0.176	NBS: ISConc=99.3; LC: TargetConc=635, Stdev=76; HC: TargetConc=1350, Stdev=160	Peak Area	0	0	0
HIE with sampling at different times (A)	HIE-6h	ESI1	1	Gln\Lys IS	sample0014_134530	8000086560	Initial	MRM+	152.10/88.10	IS		99.3	0	458104	12126	0	0	0	0	Savitzky-Golay,7,2	0.13/0.80	0.469	NBS: Internal Standard;	Peak Area	0	0	0
HIE with sampling at different times (A)	HIE-6h	ESI1	1	Glu	sample0014_134530	8000086560	Initial	MRM+	148.10/84.00	Qualifier	Gln\Lys IS	0	217.691	1004279	28801	0	0	458104	12126	Savitzky-Golay,7,2	0.13/0.80	0.205	NBS: ISConc=-1;	Peak Area	0	0	0
HIE with sampling at different times (A)	HIE-6h	ESI1	1	Gly	sample0014_134530	8000086560	Initial	MRM+	76.00/30.00	Qualifier	Gly IS	0	482.698	354496	10522	0	0	438616	12347	Savitzky-Golay,7,2	0.13/0.80	0.205	NBS: ISConc=553; LC: TargetConc=549, Stdev=66; HC: TargetConc=1320, Stdev=160	Peak Area	0	0	0
HIE with sampling at different times (A)	HIE-6h	ESI1	1	Gly IS	sample0014_134530	8000086560	Initial	MRM+	78.00/32.00	IS		553	0	438616	12347	0	0	0	0	Savitzky-Golay,7,2	0.13/0.80	0.205	NBS: Internal Standard;	Peak Area	0	0	0
HIE with sampling at different times (A)	HIE-6h	ESI1	1	Leu\Ile\Pro-OH	sample0014_134530	8000086560	Initial	MRM+	132.10/86.10	Qualifier	Leu\Ile\Pro-OH IS	0	220.969	6297327	192203	0	0	2907150	91224	Savitzky-Golay,7,2	0.13/0.80	0.205	NBS: ISConc=101; Initial: LimitLow=0, LimitHigh=380; Retest: LimitLow=0, LimitHigh=380; Recall: LimitLow=0, LimitHigh=380; Recall retest: LimitLow=0, LimitHigh=380; LC: TargetConc=183, Stdev=22; HC: TargetConc=772, Stdev=93	Peak Area	190	0	380
HIE with sampling at different times (A)	HIE-6h	ESI1	1	Leu\Ile\Pro-OH IS	sample0014_134530	8000086560	Initial	MRM+	135.10/89.10	IS		101	0	2907150	91224	0	0	0	0	Savitzky-Golay,7,2	0.13/0.80	0.205	NBS: Internal Standard;	Peak Area	0	0	0
HIE with sampling at different times (A)	HIE-6h	ESI1	1	Met	sample0014_134530	8000086560	Initial	MRM+	150.10/104.10	Qualifier	Met IS	0	16.292	71304	2243	0	0	506151	14741	Savitzky-Golay,7,2	0.13/0.80	0.44	NBS: ISConc=99.7; Initial: LimitLow=7, LimitHigh=80; Retest: LimitLow=7, LimitHigh=80; Recall: LimitLow=7, LimitHigh=80; Recall retest: LimitLow=7, LimitHigh=80; LC: TargetConc=36, Stdev=4.3; HC: TargetConc=177, Stdev=21	Peak Area	43.5	7	80
HIE with sampling at different times (A)	HIE-6h	ESI1	1	Met IS	sample0014_134530	8000086560	Initial	MRM+	153.10/107.10	IS		99.7	0	506151	14741	0	0	0	0	Savitzky-Golay,7,2	0.13/0.80	0.176	NBS: Internal Standard;	Peak Area	0	0	0
HIE with sampling at different times (A)	HIE-6h	ESI1	1	Orn	sample0014_134530	8000086560	Initial	MRM+	133.10/70.10	Qualifier	Orn IS	0	19.279	120619	3711	0	0	681948	19407	Savitzky-Golay,7,2	0.13/0.80	0.176	NBS: ISConc=109; LC: TargetConc=154, Stdev=18; HC: TargetConc=488, Stdev=59	Peak Area	0	0	0
HIE with sampling at different times (A)	HIE-6h	ESI1	1	Orn IS	sample0014_134530	8000086560	Initial	MRM+	139.10/76.10	IS		109	0	681948	19407	0	0	0	0	Savitzky-Golay,7,2	0.13/0.80	0.205	NBS: Internal Standard;	Peak Area	0	0	0
HIE with sampling at different times (A)	HIE-6h	ESI1	1	Phe	sample0014_134530	8000086560	Initial	MRM+	166.10/120.10	Qualifier	Phe IS	0	75.259	2709482	78963	0	0	2791760	80485	Savitzky-Golay,7,2	0.13/0.80	0.205	NBS: ISConc=71.8; Initial: LimitLow=0, LimitHigh=120; Retest: LimitLow=0, LimitHigh=120; Recall: LimitLow=0, LimitHigh=120; Recall retest: LimitLow=0, LimitHigh=120; LC: TargetConc=79.4, Stdev=9.5; HC: TargetConc=264, Stdev=32	Peak Area	60	0	120
HIE with sampling at different times (A)	HIE-6h	ESI1	1	Phe IS	sample0014_134530	8000086560	Initial	MRM+	172.10/126.10	IS		71.8	0	2791760	80485	0	0	0	0	Savitzky-Golay,7,2	0.13/0.80	0.205	NBS: Internal Standard;	Peak Area	0	0	0
HIE with sampling at different times (A)	HIE-6h	ESI1	1	Pro	sample0014_134530	8000086560	Initial	MRM+	116.10/70.10	Qualifier	Pro IS	0	97.48	2168033	61187	0	0	1741892	50989	Savitzky-Golay,7,2	0.13/0.80	0.205	NBS: ISConc=88; LC: TargetConc=235, Stdev=28; HC: TargetConc=683, Stdev=82	Peak Area	0	0	0
HIE with sampling at different times (A)	HIE-6h	ESI1	1	Pro IS	sample0014_134530	8000086560	Initial	MRM+	121.10/74.10	IS		88	0	1741892	50989	0	0	0	0	Savitzky-Golay,7,2	0.13/0.80	0.205	NBS: Internal Standard;	Peak Area	0	0	0
HIE with sampling at different times (A)	HIE-6h	ESI1	1	Tyr	sample0014_134530	8000086560	Initial	MRM+	182.10/136.10	Qualifier	Tyr IS	0	91.38	622428	17378	0	0	962114	27493	Savitzky-Golay,7,2	0.13/0.80	0.205	NBS: ISConc=113; LC: TargetConc=136, Stdev=16; HC: TargetConc=549, Stdev=66	Peak Area	0	0	0
HIE with sampling at different times (A)	HIE-6h	ESI1	1	Tyr IS	sample0014_134530	8000086560	Initial	MRM+	188.10/142.10	IS		113	0	962114	27493	0	0	0	0	Savitzky-Golay,7,2	0.13/0.80	0.205	NBS: Internal Standard;	Peak Area	0	0	0
HIE with sampling at different times (A)	HIE-6h	ESI1	1	Val	sample0014_134530	8000086560	Initial	MRM+	118.10/72.10	Qualifier	Val IS	0	150.921	2473171	73593	0	0	1982194	59240	Savitzky-Golay,7,2	0.13/0.80	0.205	NBS: ISConc=108; LC: TargetConc=213, Stdev=26; HC: TargetConc=470, Stdev=56	Peak Area	0	0	0
HIE with sampling at different times (A)	HIE-6h	ESI1	1	Val IS	sample0014_134530	8000086560	Initial	MRM+	124.10/77.10	IS		108	0	1982194	59240	0	0	0	0	Savitzky-Golay,7,2	0.13/0.80	0.205	NBS: Internal Standard;	Peak Area	0	0	0
HIE with sampling at different times (A)	HIE-6h	ESI1	1	C0	sample0014_134530	8000086560	Initial	MRM+	162.10/103.00	Qualifier	C0 IS	0	27.221	713979	19981	0	0	386088	11346	Savitzky-Golay,7,2	0.13/0.80	0.469	NBS: ISConc=11.5; Initial: LimitLow=8, LimitHigh=90; Retest: LimitLow=8, LimitHigh=90; Recall: LimitLow=8, LimitHigh=90; Recall retest: LimitLow=8, LimitHigh=90; LC: TargetConc=41, Stdev=4.9; HC: TargetConc=151, Stdev=18	Peak Area	49	8	90
HIE with sampling at different times (A)	HIE-6h	ESI1	1	C0 IS	sample0014_134530	8000086560	Initial	MRM+	171.20/103.00	IS		11.5	0	386088	11346	0	0	0	0	Savitzky-Golay,7,2	0.13/0.80	0.763	NBS: Internal Standard;	Peak Area	0	0	0
HIE with sampling at different times (A)	HIE-6h	ESI1	1	C2	sample0014_134530	8000086560	Initial	MRM+	204.10/85.00	Qualifier	C2 IS	0	5.937	963332	26358	0	0	853173	23885	Savitzky-Golay,7,2	0.13/0.80	0.528	NBS: ISConc=4.78; Initial: LimitLow=0, LimitHigh=115; Retest: LimitLow=0, LimitHigh=115; Recall: LimitLow=0, LimitHigh=115; Recall retest: LimitLow=0, LimitHigh=115; LC: TargetConc=27.6, Stdev=3.3; HC: TargetConc=82.4, Stdev=9.9	Peak Area	57.5	0	115
HIE with sampling at different times (A)	HIE-6h	ESI1	1	C2 IS	sample0014_134530	8000086560	Initial	MRM+	207.10/85.00	IS		4.78	0	853173	23885	0	0	0	0	Savitzky-Golay,7,2	0.13/0.80	0.411	NBS: Internal Standard;	Peak Area	0	0	0
HIE with sampling at different times (A)	HIE-6h	ESI1	1	C3	sample0014_134530	8000086560	Initial	MRM+	218.10/85.00	Qualifier	C3 IS	0	0.279	51994	1532	0	0	378094	10268	Savitzky-Golay,7,2	0.13/0.80	0.293	NBS: ISConc=2.03; Initial: LimitLow=0, LimitHigh=6.8; Retest: LimitLow=0, LimitHigh=6.8; Recall: LimitLow=0, LimitHigh=6.8; Recall retest: LimitLow=0, LimitHigh=6.8; LC: TargetConc=4.63, Stdev=0.56; HC: TargetConc=13.3, Stdev=1.6	Peak Area	3.4	0	6.8
HIE with sampling at different times (A)	HIE-6h	ESI1	1	C3 IS	sample0014_134530	8000086560	Initial	MRM+	221.20/85.00	IS		2.03	0	378094	10268	0	0	0	0	Savitzky-Golay,7,2	0.13/0.80	0.381	NBS: Internal Standard;	Peak Area	0	0	0
HIE with sampling at different times (A)	HIE-6h	ESI1	1	C3DC\C4OH	sample0014_134530	8000086560	Initial	MRM+	248.10/85.00	Qualifier	C4 IS	0	0.181	41754	1435	0	0	334218	9094	Savitzky-Golay,7,2	0.13/0.80	0.733	NBS: ISConc=-1; Initial: LimitLow=0, LimitHigh=10; Retest: LimitLow=0.04, LimitHigh=10; Recall: LimitLow=0.04, LimitHigh=10; Recall retest: LimitLow=0.04, LimitHigh=10	Peak Area	5	0	10
HIE with sampling at different times (A)	HIE-6h	ESI1	1	C4	sample0014_134530	8000086560	Initial	MRM+	232.20/85.00	Qualifier	C4 IS	0	0.052	11900	413	0	0	334218	9094	Savitzky-Golay,7,2	0.13/0.80	0.587	NBS: ISConc=1.45; Initial: LimitLow=0, LimitHigh=1.5; Retest: LimitLow=0, LimitHigh=1.5; Recall: LimitLow=0, LimitHigh=1.5; Recall retest: LimitLow=0, LimitHigh=1.5; LC: TargetConc=0.74, Stdev=0.1; HC: TargetConc=2.74, Stdev=0.33	Peak Area	0.75	0	1.5
HIE with sampling at different times (A)	HIE-6h	ESI1	1	C4 IS	sample0014_134530	8000086560	Initial	MRM+	235.20/85.00	IS		1.45	0	334218	9094	0	0	0	0	Savitzky-Golay,7,2	0.13/0.80	0.381	NBS: Internal Standard;	Peak Area	0	0	0
HIE with sampling at different times (A)	HIE-6h	ESI1	1	C4DC\C5OH	sample0014_134530	8000086560	Initial	MRM+	262.20/85.00	Qualifier	C5 IS	0	0.032	8317	328	0	0	390735	10935	Savitzky-Golay,7,2	0.13/0.80	0.763	NBS: ISConc=-1; Initial: LimitLow=0, LimitHigh=0.5; Retest: LimitLow=0, LimitHigh=0.5; Recall: LimitLow=0, LimitHigh=0.5; Recall retest: LimitLow=0, LimitHigh=0.5	Peak Area	0.25	0	0.5
HIE with sampling at different times (A)	HIE-6h	ESI1	1	C5	sample0014_134530	8000086560	Initial	MRM+	246.20/85.00	Qualifier	C5 IS	0	0.039	10549	407	0	0	390735	10935	Savitzky-Golay,7,2	0.13/0.80	0.411	NBS: ISConc=1.52; Initial: LimitLow=0, LimitHigh=0.56; Retest: LimitLow=0, LimitHigh=0.56; Recall: LimitLow=0, LimitHigh=0.56; Recall retest: LimitLow=0, LimitHigh=0.56; LC: TargetConc=0.63, Stdev=0.08; HC: TargetConc=2.46, Stdev=0.3	Peak Area	0.28	0	0.56
HIE with sampling at different times (A)	HIE-6h	ESI1	1	C5 IS	sample0014_134530	8000086560	Initial	MRM+	255.20/85.00	IS		1.52	0	390735	10935	0	0	0	0	Savitzky-Golay,7,2	0.13/0.80	0.176	NBS: Internal Standard;	Peak Area	0	0	0
HIE with sampling at different times (A)	HIE-6h	ESI1	1	C5:1	sample0014_134530	8000086560	Initial	MRM+	244.20/85.00	Qualifier	C5 IS	0	0.024	6156	278	0	0	390735	10935	Savitzky-Golay,7,2	0.13/0.80	0.499	NBS: ISConc=-1; Initial: LimitLow=0, LimitHigh=0.15; Retest: LimitLow=0, LimitHigh=0.15; Recall: LimitLow=0, LimitHigh=0.15; Recall retest: LimitLow=0, LimitHigh=0.15	Peak Area	0.075	0	0.15
HIE with sampling at different times (A)	HIE-6h	ESI1	1	C5DC\C6OH	sample0014_134530	8000086560	Initial	MRM+	276.20/85.00	Qualifier	C5DC\C6OH IS	0	0.036	2940	187	0	0	122515	3612	Savitzky-Golay,7,2	0.13/0.80	0.616	NBS: ISConc=1.49; Initial: LimitLow=0, LimitHigh=0.3; Retest: LimitLow=0, LimitHigh=0.3; Recall: LimitLow=0, LimitHigh=0.3; Recall retest: LimitLow=0, LimitHigh=0.3; LC: TargetConc=0.39, Stdev=0.09; HC: TargetConc=1.98, Stdev=0.24	Peak Area	0.15	0	0.3
HIE with sampling at different times (A)	HIE-6h	ESI1	1	C5DC\C6OH IS	sample0014_134530	8000086560	Initial	MRM+	282.20/85.00	IS		1.49	0	122515	3612	0	0	0	0	Savitzky-Golay,7,2	0.13/0.80	0.205	NBS: Internal Standard;	Peak Area	0	0	0
HIE with sampling at different times (A)	HIE-6h	ESI1	1	C6	sample0014_134530	8000086560	Initial	MRM+	260.20/85.00	Qualifier	C6 IS	0	0.002	598	38	0	0	295299	7842	Savitzky-Golay,7,2	0.13/0.80	0.411	NBS: ISConc=1.03; Initial: LimitLow=0, LimitHigh=0.2; Retest: LimitLow=0, LimitHigh=0.2; Recall: LimitLow=0, LimitHigh=0.2; Recall retest: LimitLow=0, LimitHigh=0.2; LC: TargetConc=0.29, Stdev=0.09; HC: TargetConc=1.4, Stdev=0.17	Peak Area	0.1	0	0.2
HIE with sampling at different times (A)	HIE-6h	ESI1	1	C6 IS	sample0014_134530	8000086560	Initial	MRM+	263.20/85.00	IS		1.03	0	295299	7842	0	0	0	0	Savitzky-Golay,7,2	0.13/0.80	0.176	NBS: Internal Standard;	Peak Area	0	0	0
HIE with sampling at different times (A)	HIE-6h	ESI1	1	C6DC	sample0014_134530	8000086560	Initial	MRM+	290.20/85.00	Qualifier	C5DC\C6OH IS	0	0.032	2644	111	0	0	122515	3612	Savitzky-Golay,7,2	0.13/0.80	0.645	NBS: ISConc=-1;	Peak Area	0	0	0
HIE with sampling at different times (A)	HIE-6h	ESI1	1	C8	sample0014_134530	8000086560	Initial	MRM+	288.20/85.00	Qualifier	C8 IS	0	0.054	14769	490	0	0	284900	8816	Savitzky-Golay,7,2	0.13/0.80	0.176	NBS: ISConc=1.04; Initial: LimitLow=0, LimitHigh=0.4; Retest: LimitLow=0, LimitHigh=0.4; Recall: LimitLow=0, LimitHigh=0.4; Recall retest: LimitLow=0, LimitHigh=0.4; LC: TargetConc=0.55, Stdev=0.08; HC: TargetConc=2.76, Stdev=0.33	Peak Area	0.2	0	0.4
HIE with sampling at different times (A)	HIE-6h	ESI1	1	C8 IS	sample0014_134530	8000086560	Initial	MRM+	291.20/85.00	IS		1.04	0	284900	8816	0	0	0	0	Savitzky-Golay,7,2	0.13/0.80	0.205	NBS: Internal Standard;	Peak Area	0	0	0
HIE with sampling at different times (A)	HIE-6h	ESI1	1	C8:1	sample0014_134530	8000086560	Initial	MRM+	286.20/85.00	Qualifier	C8 IS	0	0.009	2527	166	0	0	284900	8816	Savitzky-Golay,7,2	0.13/0.80	0.147	NBS: ISConc=-1;	Peak Area	0	0	0
HIE with sampling at different times (A)	HIE-6h	ESI1	1	C10	sample0014_134530	8000086560	Initial	MRM+	316.20/85.00	Qualifier	C10 IS	0	0.103	30329	1037	0	0	322742	10216	Savitzky-Golay,7,2	0.13/0.80	0.733	NBS: ISConc=0.91; Initial: LimitLow=0, LimitHigh=0.29; Retest: LimitLow=0, LimitHigh=0.29; Recall: LimitLow=0, LimitHigh=0.29; Recall retest: LimitLow=0, LimitHigh=0.29; LC: TargetConc=0.31, Stdev=0.09; HC: TargetConc=2.02, Stdev=0.24	Peak Area	0.145	0	0.29
HIE with sampling at different times (A)	HIE-6h	ESI1	1	C10 IS	sample0014_134530	8000086560	Initial	MRM+	319.30/85.00	IS		0.91	0	322742	10216	0	0	0	0	Savitzky-Golay,7,2	0.13/0.80	0.176	NBS: Internal Standard;	Peak Area	0	0	0
HIE with sampling at different times (A)	HIE-6h	ESI1	1	C10:1	sample0014_134530	8000086560	Initial	MRM+	314.20/85.00	Qualifier	C10 IS	0	0.021	7506	270	0	0	322742	10216	Savitzky-Golay,7,2	0.13/0.80	0.704	NBS: ISConc=-1; Initial: LimitLow=0, LimitHigh=0.3; Retest: LimitLow=0, LimitHigh=0.3; Recall: LimitLow=0, LimitHigh=0.3; Recall retest: LimitLow=0, LimitHigh=0.3	Peak Area	0.15	0	0.3
HIE with sampling at different times (A)	HIE-6h	ESI1	1	C10:2	sample0014_134530	8000086560	Initial	MRM+	312.20/85.00	Qualifier	C10 IS	0	0.003	1004	49	0	0	322742	10216	Savitzky-Golay,7,2	0.13/0.80	0.352	NBS: ISConc=-1; Initial: LimitLow=0, LimitHigh=100; Retest: LimitLow=0, LimitHigh=100; Recall: LimitLow=0, LimitHigh=100; Recall retest: LimitLow=0, LimitHigh=100	Peak Area	50	0	100
HIE with sampling at different times (A)	HIE-6h	ESI1	1	C12	sample0014_134530	8000086560	Initial	MRM+	344.30/85.00	Qualifier	C12 IS	0	0.216	88119	2768	0	0	423543	12039	Savitzky-Golay,7,2	0.13/0.80	0.205	NBS: ISConc=1; Initial: LimitLow=0, LimitHigh=0.33; Retest: LimitLow=0, LimitHigh=0.33; Recall: LimitLow=0, LimitHigh=0.33; Recall retest: LimitLow=0, LimitHigh=0.33; LC: TargetConc=0.28, Stdev=0.09; HC: TargetConc=1.36, Stdev=0.16	Peak Area	0.165	0	0.33
HIE with sampling at different times (A)	HIE-6h	ESI1	1	C12 IS	sample0014_134530	8000086560	Initial	MRM+	347.30/85.00	IS		1	0	423543	12039	0	0	0	0	Savitzky-Golay,7,2	0.13/0.80	0.381	NBS: Internal Standard;	Peak Area	0	0	0
HIE with sampling at different times (A)	HIE-6h	ESI1	1	C12:1	sample0014_134530	8000086560	Initial	MRM+	342.30/85.00	Qualifier	C12 IS	0	0.011	4627	317	0	0	423543	12039	Savitzky-Golay,7,2	0.13/0.80	0.147	NBS: ISConc=-1; Initial: LimitLow=0, LimitHigh=1000; Retest: LimitLow=0, LimitHigh=1000; Recall: LimitLow=0, LimitHigh=1000; Recall retest: LimitLow=0, LimitHigh=10000	Peak Area	500	0	1000
HIE with sampling at different times (A)	HIE-6h	ESI1	1	C14	sample0014_134530	8000086560	Initial	MRM+	372.30/85.00	Qualifier	C14 IS	0	0.469	247043	7193	0	0	574947	17052	Savitzky-Golay,7,2	0.13/0.80	0.205	NBS: ISConc=1.02; Initial: LimitLow=0, LimitHigh=0.59; Retest: LimitLow=0, LimitHigh=0.59; Recall: LimitLow=0, LimitHigh=0.59; Recall retest: LimitLow=0, LimitHigh=0.59; LC: TargetConc=0.33, Stdev=0.09; HC: TargetConc=1.9, Stdev=0.23	Peak Area	0.295	0	0.59
HIE with sampling at different times (A)	HIE-6h	ESI1	1	C14 IS	sample0014_134530	8000086560	Initial	MRM+	375.30/85.00	IS		1.02	0	574947	17052	0	0	0	0	Savitzky-Golay,7,2	0.13/0.80	0.176	NBS: Internal Standard;	Peak Area	0	0	0
HIE with sampling at different times (A)	HIE-6h	ESI1	1	C14:1	sample0014_134530	8000086560	Initial	MRM+	370.30/85.00	Qualifier	C14 IS	0	0.049	27617	888	0	0	574947	17052	Savitzky-Golay,7,2	0.13/0.80	0.147	NBS: ISConc=-1; Initial: LimitLow=0, LimitHigh=0.32; Retest: LimitLow=0, LimitHigh=0.32; Recall: LimitLow=0, LimitHigh=0.32; Recall retest: LimitLow=0, LimitHigh=0.32	Peak Area	0.16	0	0.32
HIE with sampling at different times (A)	HIE-6h	ESI1	1	C14:2	sample0014_134530	8000086560	Initial	MRM+	368.30/85.00	Qualifier	C14 IS	0	0.006	3204	165	0	0	574947	17052	Savitzky-Golay,7,2	0.13/0.80	0.645	NBS: ISConc=-1;	Peak Area	0	0	0
HIE with sampling at different times (A)	HIE-6h	ESI1	1	C14OH	sample0014_134530	8000086560	Initial	MRM+	388.30/85.00	Qualifier	C14 IS	0	0	0	0	0	0	574947	17052	Savitzky-Golay,7,2	0.13/0.80	0.763	NBS: ISConc=-1; Initial: LimitLow=0, LimitHigh=0.2; Retest: LimitLow=0, LimitHigh=0.2; Recall: LimitLow=0, LimitHigh=0.2; Recall retest: LimitLow=0, LimitHigh=0.2	Peak Area	0.1	0	0.2
HIE with sampling at different times (A)	HIE-6h	ESI1	1	C16	sample0014_134530	8000086560	Initial	MRM+	400.30/85.00	Qualifier	C16 IS	0	2.087	1128862	32255	0	0	515193	14675	Savitzky-Golay,7,2	0.13/0.80	0.176	NBS: ISConc=0.89; Initial: LimitLow=0.3, LimitHigh=8.5; Retest: LimitLow=0.3, LimitHigh=8.5; Recall: LimitLow=0.3, LimitHigh=8.5; Recall retest: LimitLow=0.3, LimitHigh=8.5; LC: TargetConc=2.02, Stdev=0.24; HC: TargetConc=11.7, Stdev=1.4	Peak Area	4.4	0.3	8.5
HIE with sampling at different times (A)	HIE-6h	ESI1	1	C16 IS	sample0014_134530	8000086560	Initial	MRM+	403.40/85.00	IS		0.89	0	515193	14675	0	0	0	0	Savitzky-Golay,7,2	0.13/0.80	0.264	NBS: Internal Standard;	Peak Area	0	0	0
HIE with sampling at different times (A)	HIE-6h	ESI1	1	C16:1	sample0014_134530	8000086560	Initial	MRM+	398.30/85.00	Qualifier	C16 IS	0	0.1	57841	1765	0	0	515193	14675	Savitzky-Golay,7,2	0.13/0.80	0.205	NBS: ISConc=-1;	Peak Area	0	0	0
HIE with sampling at different times (A)	HIE-6h	ESI1	1	C16OH	sample0014_134530	8000086560	Initial	MRM+	416.30/85.00	Qualifier	C16 IS	0	0.033	19159	711	0	0	515193	14675	Savitzky-Golay,7,2	0.13/0.80	0.205	NBS: ISConc=-1; Initial: LimitLow=0, LimitHigh=0.19; Retest: LimitLow=0, LimitHigh=0.19; Recall: LimitLow=0, LimitHigh=0.19; Recall retest: LimitLow=0, LimitHigh=0.19	Peak Area	0.095	0	0.19
HIE with sampling at different times (A)	HIE-6h	ESI1	1	C16:1OH\C17	sample0014_134530	8000086560	Initial	MRM+	414.30/85.00	Qualifier	C16 IS	0	0.078	44905	1367	0	0	515193	14675	Savitzky-Golay,7,2	0.13/0.80	0.176	NBS: ISConc=-1; Initial: LimitLow=0, LimitHigh=0.22; Retest: LimitLow=0, LimitHigh=0.22; Recall: LimitLow=0, LimitHigh=0.22; Recall retest: LimitLow=0, LimitHigh=0.22	Peak Area	0.11	0	0.22
HIE with sampling at different times (A)	HIE-6h	ESI1	1	C18	sample0014_134530	8000086560	Initial	MRM+	428.40/85.00	Qualifier	C18 IS	0	0.635	368234	10193	0	0	645291	18164	Savitzky-Golay,7,2	0.13/0.80	0.176	NBS: ISConc=0.92; Initial: LimitLow=0.13, LimitHigh=2.5; Retest: LimitLow=0.13, LimitHigh=2.5; Recall: LimitLow=0.13, LimitHigh=2.5; Recall retest: LimitLow=0.13, LimitHigh=2.5; LC: TargetConc=1.14, Stdev=0.14; HC: TargetConc=4.32, Stdev=0.52	Peak Area	1.315	0.13	2.5
HIE with sampling at different times (A)	HIE-6h	ESI1	1	C18 IS	sample0014_134530	8000086560	Initial	MRM+	431.40/85.00	IS		0.92	0	645291	18164	0	0	0	0	Savitzky-Golay,7,2	0.13/0.80	0.176	NBS: Internal Standard;	Peak Area	0	0	0
HIE with sampling at different times (A)	HIE-6h	ESI1	1	C18:1	sample0014_134530	8000086560	Initial	MRM+	426.40/85.00	Qualifier	C18 IS	0	1.078	756288	20792	0	0	645291	18164	Savitzky-Golay,7,2	0.13/0.80	0.235	NBS: ISConc=-1; Initial: LimitLow=0.15, LimitHigh=3.35; Retest: LimitLow=0.15, LimitHigh=3.35; Recall: LimitLow=0.15, LimitHigh=3.35; Recall retest: LimitLow=0.15, LimitHigh=3.35	Peak Area	1.75	0.15	3.35
HIE with sampling at different times (A)	HIE-6h	ESI1	1	C18:2	sample0014_134530	8000086560	Initial	MRM+	424.30/85.00	Qualifier	C18 IS	0	0.011	7744	280	0	0	645291	18164	Savitzky-Golay,7,2	0.13/0.80	0.411	NBS: ISConc=-1;	Peak Area	0	0	0
HIE with sampling at different times (A)	HIE-6h	ESI1	1	C18OH	sample0014_134530	8000086560	Initial	MRM+	444.40/85.00	Qualifier	C18 IS	0	0.022	15775	634	0	0	645291	18164	Savitzky-Golay,7,2	0.13/0.80	0.352	NBS: ISConc=-1; Initial: LimitLow=0, LimitHigh=0.14; Retest: LimitLow=0, LimitHigh=0.14; Recall: LimitLow=0, LimitHigh=0.14; Recall retest: LimitLow=0, LimitHigh=0.14	Peak Area	0.07	0	0.14
HIE with sampling at different times (A)	HIE-6h	ESI1	1	C18:1OH	sample0014_134530	8000086560	Initial	MRM+	442.40/85.00	Qualifier	C18 IS	0	0.047	33249	953	0	0	645291	18164	Savitzky-Golay,7,2	0.13/0.80	0.44	NBS: ISConc=-1; Initial: LimitLow=0, LimitHigh=0.16; Retest: LimitLow=0, LimitHigh=0.16; Recall: LimitLow=0, LimitHigh=0.16; Recall retest: LimitLow=0, LimitHigh=0.16	Peak Area	0.08	0	0.16
HIE with sampling at different times (A)	HIE-6h	ESI1	1	C18:2OH	sample0014_134530	8000086560	Initial	MRM+	440.30/85.00	Qualifier	C18 IS	0	0.129	90401	2671	0	0	645291	18164	Savitzky-Golay,7,2	0.13/0.80	0.264	NBS: ISConc=-1;	Peak Area	0	0	0
HIE with sampling at different times (A)	HIE-6h	ESI1	1	C20	sample0014_134530	8000086560	Initial	MRM+	456.40/85.00	Qualifier	C26 IS	0	0.035	31415	970	0	0	970700	25796	Savitzky-Golay,7,2	0.13/0.80	0.499	NBS: ISConc=-1;	Peak Area	0	0	0
HIE with sampling at different times (A)	HIE-6h	ESI1	1	C22	sample0014_134530	8000086560	Initial	MRM+	484.40/85.00	Qualifier	C26 IS	0	0.016	14420	489	0	0	970700	25796	Savitzky-Golay,7,2	0.13/0.80	0.557	NBS: ISConc=-1;	Peak Area	0	0	0
HIE with sampling at different times (A)	HIE-6h	ESI1	1	C24	sample0014_134530	8000086560	Initial	MRM+	512.50/85.00	Qualifier	C26 IS	0	0.052	46724	1439	0	0	970700	25796	Savitzky-Golay,7,2	0.13/0.80	0.352	NBS: ISConc=-1;	Peak Area	0	0	0
HIE with sampling at different times (A)	HIE-6h	ESI1	1	C26	sample0014_134530	8000086560	Initial	MRM+	540.50/85.00	Qualifier	C26 IS	0	0.009	7721	278	0	0	970700	25796	Savitzky-Golay,7,2	0.13/0.80	0.176	NBS: ISConc=1.09; LC: TargetConc=0.61, Stdev=0.09; HC: TargetConc=1.66, Stdev=0.2	Peak Area	0	0	0
HIE with sampling at different times (A)	HIE-6h	ESI1	1	C26 IS	sample0014_134530	8000086560	Initial	MRM+	543.50/85.00	IS		1.09	0	970700	25796	0	0	0	0	Savitzky-Golay,7,2	0.13/0.80	0.733	NBS: Internal Standard;	Peak Area	0	0	0
HIE with sampling at different times (A)	HIE-6h	ESI1	1	SA	sample0014_134530	8000086560	Initial	MRM+	155.10/109.10	Qualifier	SA IS	0	0.351	9959	368	0	0	1647842	46242	Savitzky-Golay,7,2	0.13/0.80	0.147	NBS: ISConc=58.1; Initial: LimitLow=0, LimitHigh=2; Retest: LimitLow=0, LimitHigh=2; Recall: LimitLow=0, LimitHigh=2; Recall retest: LimitLow=0, LimitHigh=2; LC: TargetConc=2.57, Stdev=0.38; HC: TargetConc=10.4, Stdev=1.2	Peak Area	1	0	2
HIE with sampling at different times (A)	HIE-6h	ESI1	1	SA IS	sample0014_134530	8000086560	Initial	MRM+	160.10/114.10	IS		58.1	0	1647842	46242	0	0	0	0	Savitzky-Golay,7,2	0.13/0.80	0.205	NBS: Internal Standard;	Peak Area	0	0	0
HIE with sampling at different times (A)	HIE-6h	ESI1	1	ADO	sample0014_134530	8000086560	Initial	MRM+	268.10/136.10	Qualifier	ADO IS	0	0.372	26330	1078	0	0	467765	15036	Savitzky-Golay,7,2	0.13/0.80	0.176	NBS: ISConc=9.44; LC: TargetConc=2.51, Stdev=0.34; HC: TargetConc=6.91, Stdev=0.83	Peak Area	0	0	0
HIE with sampling at different times (A)	HIE-6h	ESI1	1	ADO IS	sample0014_134530	8000086560	Initial	MRM+	273.10/136.10	IS		9.44	0	467765	15036	0	0	0	0	Savitzky-Golay,7,2	0.13/0.80	0.205	NBS: Internal Standard;	Peak Area	0	0	0
HIE with sampling at different times (A)	HIE-6h	ESI1	1	D-ADO	sample0014_134530	8000086560	Initial	MRM+	252.10/136.10	Qualifier	D-ADO IS	0	0.033	1945	147	0	0	577756	17512	Savitzky-Golay,7,2	0.13/0.80	0.704	NBS: ISConc=9.82;	Peak Area	0	0	0
HIE with sampling at different times (A)	HIE-6h	ESI1	1	D-ADO IS	sample0014_134530	8000086560	Initial	MRM+	257.10/136.10	IS		9.82	0	577756	17512	0	0	0	0	Savitzky-Golay,7,2	0.13/0.80	0.205	NBS: Internal Standard;	Peak Area	0	0	0
HIE with sampling at different times (A)	HIE-6h	ESI1	1	C20:0-LPC	sample0014_134530	8000086560	Initial	MRM+	552.40/104.10	Qualifier	C26:0-LPC IS	0	1.835	107928	2907	0	0	258782	7246	Savitzky-Golay,7,2	0.13/0.80	0.147	NBS: ISConc=-1;	Peak Area	0	0	0
HIE with sampling at different times (A)	HIE-6h	ESI1	1	C22:0-LPC	sample0014_134530	8000086560	Initial	MRM+	580.40/104.10	Qualifier	C26:0-LPC IS	0	1.35	79420	2166	0	0	258782	7246	Savitzky-Golay,7,2	0.13/0.80	0.411	NBS: ISConc=-1;	Peak Area	0	0	0
HIE with sampling at different times (A)	HIE-6h	ESI1	1	C24:0-LPC	sample0014_134530	8000086560	Initial	MRM+	608.50/104.10	Qualifier	C26:0-LPC IS	0	1.822	107178	3080	0	0	258782	7246	Savitzky-Golay,7,2	0.13/0.80	0.616	NBS: ISConc=-1;	Peak Area	0	0	0
HIE with sampling at different times (A)	HIE-6h	ESI1	1	C26:0-LPC	sample0014_134530	8000086560	Initial	MRM+	636.50/104.10	Qualifier	C26:0-LPC IS	0	0.51	33359	1287	0	0	258782	7246	Savitzky-Golay,7,2	0.13/0.80	0.645	NBS: ISConc=4.4; LC: TargetConc=0.92, Stdev=0.11; HC: TargetConc=3.04, Stdev=0.36	Peak Area	0	0	0
HIE with sampling at different times (A)	HIE-6h	ESI1	1	C26:0-LPC IS	sample0014_134530	8000086560	Initial	MRM+	640.50/104.10	IS		4.4	0	258782	7246	0	0	0	0	Savitzky-Golay,7,2	0.13/0.80	0.704	NBS: Internal Standard;	Peak Area	0	0	0
HIE with sampling at different times (A)	HIE-6h	ESI1	1	ASA	sample0014_134530	8000086560	Initial	MRM+	291.10/70.10	Qualifier	Arg IS	0	1.429	30099	1150	0	0	998090	26295	Savitzky-Golay,7,2	0.13/0.80	0.235	NBS: --	Peak Area	0	0	0
HIE with sampling at different times (A)	HIE-6h	ESI1	1	ASA anhydride I + II	sample0014_134530	8000086560	Initial	MRM+	273.10/70.10	Qualifier	Arg IS	0	0.42	8835	321	0	0	998090	26295	Savitzky-Golay,7,2	0.13/0.80	0.293	NBS: --	Peak Area	0	0	0
HIE with sampling at different times (A)	HIE-6h			ASATotal	sample0014_134530	8000086560	Initial	N/A	0.00/0.00	Qualifier	Arg IS	0	1.867	38934	1471	0	0	998090	26295	Savitzky-Golay,7,2	0.13/0.80	0	NBS: ISConc=-1; Initial: LimitLow=0, LimitHigh=1.5; Retest: LimitLow=0, LimitHigh=1.5; Recall: LimitLow=0, LimitHigh=1.5; Recall retest: LimitLow=0, LimitHigh=1.5; LC: TargetConc=2.22, Stdev=0.38; HC: TargetConc=39, Stdev=4.7	Peak Area	0.75	0	1.5
HIE with sampling at different times (A)	HIE-6h	ESI1	1	Ala	sample0015_134714	8000086564	Initial	MRM+	90.10/44.00	Qualifier	Ala IS	0	264.807	503260	14134	0	0	260080	7594	Savitzky-Golay,7,2	0.13/0.80	0.205	NBS: ISConc=115; Initial: LimitLow=0, LimitHigh=10000; Retest: LimitLow=0, LimitHigh=10000; Recall: LimitLow=0, LimitHigh=10000; Recall retest: LimitLow=0, LimitHigh=10000; LC: TargetConc=479, Stdev=57; HC: TargetConc=967, Stdev=116	Peak Area	5000	0	10000
HIE with sampling at different times (A)	HIE-6h	ESI1	1	Ala IS	sample0015_134714	8000086564	Initial	MRM+	93.10/47.10	IS		115	0	260080	7594	0	0	0	0	Savitzky-Golay,7,2	0.13/0.80	0.205	NBS: Internal Standard;	Peak Area	0	0	0
HIE with sampling at different times (A)	HIE-6h	ESI1	1	Arg	sample0015_134714	8000086564	Initial	MRM+	175.10/70.10	Qualifier	Arg IS	0	129.22	2719068	73275	0	0	1007376	27712	Savitzky-Golay,7,2	0.13/0.80	0.499	NBS: ISConc=47.4; Initial: LimitLow=0, LimitHigh=70; Retest: LimitLow=0, LimitHigh=70; Recall: LimitLow=0, LimitHigh=70; Recall retest: LimitLow=0, LimitHigh=70; LC: TargetConc=24.2, Stdev=2.9; HC: TargetConc=136, Stdev=16	Peak Area	35	0	70
HIE with sampling at different times (A)	HIE-6h	ESI1	1	Arg IS	sample0015_134714	8000086564	Initial	MRM+	180.10/75.10	IS		47.4	0	1007376	27712	0	0	0	0	Savitzky-Golay,7,2	0.13/0.80	0.411	NBS: Internal Standard;	Peak Area	0	0	0
HIE with sampling at different times (A)	HIE-6h	ESI1	1	Cit	sample0015_134714	8000086564	Initial	MRM+	176.10/113.10	Qualifier	Cit IS	0	48.497	148161	4224	0	0	282393	7668	Savitzky-Golay,7,2	0.13/0.80	0.293	NBS: ISConc=81.8; Initial: LimitLow=0, LimitHigh=80; Retest: LimitLow=0, LimitHigh=80; Recall: LimitLow=0, LimitHigh=80; Recall retest: LimitLow=0, LimitHigh=80; LC: TargetConc=33.1, Stdev=4; HC: TargetConc=147, Stdev=18	Peak Area	40	0	80
HIE with sampling at different times (A)	HIE-6h	ESI1	1	Cit IS	sample0015_134714	8000086564	Initial	MRM+	178.10/115.10	IS		81.8	0	282393	7668	0	0	0	0	Savitzky-Golay,7,2	0.13/0.80	0.381	NBS: Internal Standard;	Peak Area	0	0	0
HIE with sampling at different times (A)	HIE-6h	ESI1	1	Gln\Lys	sample0015_134714	8000086564	Initial	MRM+	147.10/84.00	Qualifier	Gln\Lys IS	0	167.296	971745	27727	0	0	519108	14077	Savitzky-Golay,7,2	0.13/0.80	0.205	NBS: ISConc=99.3; LC: TargetConc=635, Stdev=76; HC: TargetConc=1350, Stdev=160	Peak Area	0	0	0
HIE with sampling at different times (A)	HIE-6h	ESI1	1	Gln\Lys IS	sample0015_134714	8000086564	Initial	MRM+	152.10/88.10	IS		99.3	0	519108	14077	0	0	0	0	Savitzky-Golay,7,2	0.13/0.80	0.205	NBS: Internal Standard;	Peak Area	0	0	0
HIE with sampling at different times (A)	HIE-6h	ESI1	1	Glu	sample0015_134714	8000086564	Initial	MRM+	148.10/84.00	Qualifier	Gln\Lys IS	0	153.39	801872	22824	0	0	519108	14077	Savitzky-Golay,7,2	0.13/0.80	0.176	NBS: ISConc=-1;	Peak Area	0	0	0
HIE with sampling at different times (A)	HIE-6h	ESI1	1	Gly	sample0015_134714	8000086564	Initial	MRM+	76.00/30.00	Qualifier	Gly IS	0	404.12	287862	8005	0	0	425425	13633	Savitzky-Golay,7,2	0.13/0.80	0.499	NBS: ISConc=553; LC: TargetConc=549, Stdev=66; HC: TargetConc=1320, Stdev=160	Peak Area	0	0	0
HIE with sampling at different times (A)	HIE-6h	ESI1	1	Gly IS	sample0015_134714	8000086564	Initial	MRM+	78.00/32.00	IS		553	0	425425	13633	0	0	0	0	Savitzky-Golay,7,2	0.13/0.80	0.205	NBS: Internal Standard;	Peak Area	0	0	0
HIE with sampling at different times (A)	HIE-6h	ESI1	1	Leu\Ile\Pro-OH	sample0015_134714	8000086564	Initial	MRM+	132.10/86.10	Qualifier	Leu\Ile\Pro-OH IS	0	229.989	6282223	191520	0	0	2786434	88650	Savitzky-Golay,7,2	0.13/0.80	0.176	NBS: ISConc=101; Initial: LimitLow=0, LimitHigh=380; Retest: LimitLow=0, LimitHigh=380; Recall: LimitLow=0, LimitHigh=380; Recall retest: LimitLow=0, LimitHigh=380; LC: TargetConc=183, Stdev=22; HC: TargetConc=772, Stdev=93	Peak Area	190	0	380
HIE with sampling at different times (A)	HIE-6h	ESI1	1	Leu\Ile\Pro-OH IS	sample0015_134714	8000086564	Initial	MRM+	135.10/89.10	IS		101	0	2786434	88650	0	0	0	0	Savitzky-Golay,7,2	0.13/0.80	0.176	NBS: Internal Standard;	Peak Area	0	0	0
HIE with sampling at different times (A)	HIE-6h	ESI1	1	Met	sample0015_134714	8000086564	Initial	MRM+	150.10/104.10	Qualifier	Met IS	0	10.924	47817	1450	0	0	506238	13965	Savitzky-Golay,7,2	0.13/0.80	0.528	NBS: ISConc=99.7; Initial: LimitLow=7, LimitHigh=80; Retest: LimitLow=7, LimitHigh=80; Recall: LimitLow=7, LimitHigh=80; Recall retest: LimitLow=7, LimitHigh=80; LC: TargetConc=36, Stdev=4.3; HC: TargetConc=177, Stdev=21	Peak Area	43.5	7	80
HIE with sampling at different times (A)	HIE-6h	ESI1	1	Met IS	sample0015_134714	8000086564	Initial	MRM+	153.10/107.10	IS		99.7	0	506238	13965	0	0	0	0	Savitzky-Golay,7,2	0.13/0.80	0.176	NBS: Internal Standard;	Peak Area	0	0	0
HIE with sampling at different times (A)	HIE-6h	ESI1	1	Orn	sample0015_134714	8000086564	Initial	MRM+	133.10/70.10	Qualifier	Orn IS	0	34.236	228847	6815	0	0	728604	20514	Savitzky-Golay,7,2	0.13/0.80	0.205	NBS: ISConc=109; LC: TargetConc=154, Stdev=18; HC: TargetConc=488, Stdev=59	Peak Area	0	0	0
HIE with sampling at different times (A)	HIE-6h	ESI1	1	Orn IS	sample0015_134714	8000086564	Initial	MRM+	139.10/76.10	IS		109	0	728604	20514	0	0	0	0	Savitzky-Golay,7,2	0.13/0.80	0.205	NBS: Internal Standard;	Peak Area	0	0	0
HIE with sampling at different times (A)	HIE-6h	ESI1	1	Phe	sample0015_134714	8000086564	Initial	MRM+	166.10/120.10	Qualifier	Phe IS	0	56.868	2090975	59226	0	0	2851197	78385	Savitzky-Golay,7,2	0.13/0.80	0.176	NBS: ISConc=71.8; Initial: LimitLow=0, LimitHigh=120; Retest: LimitLow=0, LimitHigh=120; Recall: LimitLow=0, LimitHigh=120; Recall retest: LimitLow=0, LimitHigh=120; LC: TargetConc=79.4, Stdev=9.5; HC: TargetConc=264, Stdev=32	Peak Area	60	0	120
HIE with sampling at different times (A)	HIE-6h	ESI1	1	Phe IS	sample0015_134714	8000086564	Initial	MRM+	172.10/126.10	IS		71.8	0	2851197	78385	0	0	0	0	Savitzky-Golay,7,2	0.13/0.80	0.205	NBS: Internal Standard;	Peak Area	0	0	0
HIE with sampling at different times (A)	HIE-6h	ESI1	1	Pro	sample0015_134714	8000086564	Initial	MRM+	116.10/70.10	Qualifier	Pro IS	0	94.825	2151917	60543	0	0	1777363	48973	Savitzky-Golay,7,2	0.13/0.80	0.205	NBS: ISConc=88; LC: TargetConc=235, Stdev=28; HC: TargetConc=683, Stdev=82	Peak Area	0	0	0
HIE with sampling at different times (A)	HIE-6h	ESI1	1	Pro IS	sample0015_134714	8000086564	Initial	MRM+	121.10/74.10	IS		88	0	1777363	48973	0	0	0	0	Savitzky-Golay,7,2	0.13/0.80	0.205	NBS: Internal Standard;	Peak Area	0	0	0
HIE with sampling at different times (A)	HIE-6h	ESI1	1	Tyr	sample0015_134714	8000086564	Initial	MRM+	182.10/136.10	Qualifier	Tyr IS	0	79.806	582478	16288	0	0	1030943	29057	Savitzky-Golay,7,2	0.13/0.80	0.557	NBS: ISConc=113; LC: TargetConc=136, Stdev=16; HC: TargetConc=549, Stdev=66	Peak Area	0	0	0
HIE with sampling at different times (A)	HIE-6h	ESI1	1	Tyr IS	sample0015_134714	8000086564	Initial	MRM+	188.10/142.10	IS		113	0	1030943	29057	0	0	0	0	Savitzky-Golay,7,2	0.13/0.80	0.205	NBS: Internal Standard;	Peak Area	0	0	0
HIE with sampling at different times (A)	HIE-6h	ESI1	1	Val	sample0015_134714	8000086564	Initial	MRM+	118.10/72.10	Qualifier	Val IS	0	153.066	2460494	74998	0	0	1944398	61007	Savitzky-Golay,7,2	0.13/0.80	0.176	NBS: ISConc=108; LC: TargetConc=213, Stdev=26; HC: TargetConc=470, Stdev=56	Peak Area	0	0	0
HIE with sampling at different times (A)	HIE-6h	ESI1	1	Val IS	sample0015_134714	8000086564	Initial	MRM+	124.10/77.10	IS		108	0	1944398	61007	0	0	0	0	Savitzky-Golay,7,2	0.13/0.80	0.176	NBS: Internal Standard;	Peak Area	0	0	0
HIE with sampling at different times (A)	HIE-6h	ESI1	1	C0	sample0015_134714	8000086564	Initial	MRM+	162.10/103.00	Qualifier	C0 IS	0	17.144	471303	13557	0	0	404661	12634	Savitzky-Golay,7,2	0.13/0.80	0.733	NBS: ISConc=11.5; Initial: LimitLow=8, LimitHigh=90; Retest: LimitLow=8, LimitHigh=90; Recall: LimitLow=8, LimitHigh=90; Recall retest: LimitLow=8, LimitHigh=90; LC: TargetConc=41, Stdev=4.9; HC: TargetConc=151, Stdev=18	Peak Area	49	8	90
HIE with sampling at different times (A)	HIE-6h	ESI1	1	C0 IS	sample0015_134714	8000086564	Initial	MRM+	171.20/103.00	IS		11.5	0	404661	12634	0	0	0	0	Savitzky-Golay,7,2	0.13/0.80	0.763	NBS: Internal Standard;	Peak Area	0	0	0
HIE with sampling at different times (A)	HIE-6h	ESI1	1	C2	sample0015_134714	8000086564	Initial	MRM+	204.10/85.00	Qualifier	C2 IS	0	5.039	839010	24921	0	0	875503	25145	Savitzky-Golay,7,2	0.13/0.80	0.733	NBS: ISConc=4.78; Initial: LimitLow=0, LimitHigh=115; Retest: LimitLow=0, LimitHigh=115; Recall: LimitLow=0, LimitHigh=115; Recall retest: LimitLow=0, LimitHigh=115; LC: TargetConc=27.6, Stdev=3.3; HC: TargetConc=82.4, Stdev=9.9	Peak Area	57.5	0	115
HIE with sampling at different times (A)	HIE-6h	ESI1	1	C2 IS	sample0015_134714	8000086564	Initial	MRM+	207.10/85.00	IS		4.78	0	875503	25145	0	0	0	0	Savitzky-Golay,7,2	0.13/0.80	0.763	NBS: Internal Standard;	Peak Area	0	0	0
HIE with sampling at different times (A)	HIE-6h	ESI1	1	C3	sample0015_134714	8000086564	Initial	MRM+	218.10/85.00	Qualifier	C3 IS	0	0.195	38983	1280	0	0	405767	11488	Savitzky-Golay,7,2	0.13/0.80	0.381	NBS: ISConc=2.03; Initial: LimitLow=0, LimitHigh=6.8; Retest: LimitLow=0, LimitHigh=6.8; Recall: LimitLow=0, LimitHigh=6.8; Recall retest: LimitLow=0, LimitHigh=6.8; LC: TargetConc=4.63, Stdev=0.56; HC: TargetConc=13.3, Stdev=1.6	Peak Area	3.4	0	6.8
HIE with sampling at different times (A)	HIE-6h	ESI1	1	C3 IS	sample0015_134714	8000086564	Initial	MRM+	221.20/85.00	IS		2.03	0	405767	11488	0	0	0	0	Savitzky-Golay,7,2	0.13/0.80	0.352	NBS: Internal Standard;	Peak Area	0	0	0
HIE with sampling at different times (A)	HIE-6h	ESI1	1	C3DC\C4OH	sample0015_134714	8000086564	Initial	MRM+	248.10/85.00	Qualifier	C4 IS	0	0.117	28655	965	0	0	354601	9483	Savitzky-Golay,7,2	0.13/0.80	0.675	NBS: ISConc=-1; Initial: LimitLow=0, LimitHigh=10; Retest: LimitLow=0.04, LimitHigh=10; Recall: LimitLow=0.04, LimitHigh=10; Recall retest: LimitLow=0.04, LimitHigh=10	Peak Area	5	0	10
HIE with sampling at different times (A)	HIE-6h	ESI1	1	C4	sample0015_134714	8000086564	Initial	MRM+	232.20/85.00	Qualifier	C4 IS	0	0.048	11646	436	0	0	354601	9483	Savitzky-Golay,7,2	0.13/0.80	0.587	NBS: ISConc=1.45; Initial: LimitLow=0, LimitHigh=1.5; Retest: LimitLow=0, LimitHigh=1.5; Recall: LimitLow=0, LimitHigh=1.5; Recall retest: LimitLow=0, LimitHigh=1.5; LC: TargetConc=0.74, Stdev=0.1; HC: TargetConc=2.74, Stdev=0.33	Peak Area	0.75	0	1.5
HIE with sampling at different times (A)	HIE-6h	ESI1	1	C4 IS	sample0015_134714	8000086564	Initial	MRM+	235.20/85.00	IS		1.45	0	354601	9483	0	0	0	0	Savitzky-Golay,7,2	0.13/0.80	0.411	NBS: Internal Standard;	Peak Area	0	0	0
HIE with sampling at different times (A)	HIE-6h	ESI1	1	C4DC\C5OH	sample0015_134714	8000086564	Initial	MRM+	262.20/85.00	Qualifier	C5 IS	0	0.024	6255	240	0	0	389824	10522	Savitzky-Golay,7,2	0.13/0.80	0.381	NBS: ISConc=-1; Initial: LimitLow=0, LimitHigh=0.5; Retest: LimitLow=0, LimitHigh=0.5; Recall: LimitLow=0, LimitHigh=0.5; Recall retest: LimitLow=0, LimitHigh=0.5	Peak Area	0.25	0	0.5
HIE with sampling at different times (A)	HIE-6h	ESI1	1	C5	sample0015_134714	8000086564	Initial	MRM+	246.20/85.00	Qualifier	C5 IS	0	0.028	7528	296	0	0	389824	10522	Savitzky-Golay,7,2	0.13/0.80	0.763	NBS: ISConc=1.52; Initial: LimitLow=0, LimitHigh=0.56; Retest: LimitLow=0, LimitHigh=0.56; Recall: LimitLow=0, LimitHigh=0.56; Recall retest: LimitLow=0, LimitHigh=0.56; LC: TargetConc=0.63, Stdev=0.08; HC: TargetConc=2.46, Stdev=0.3	Peak Area	0.28	0	0.56
HIE with sampling at different times (A)	HIE-6h	ESI1	1	C5 IS	sample0015_134714	8000086564	Initial	MRM+	255.20/85.00	IS		1.52	0	389824	10522	0	0	0	0	Savitzky-Golay,7,2	0.13/0.80	0.176	NBS: Internal Standard;	Peak Area	0	0	0
HIE with sampling at different times (A)	HIE-6h	ESI1	1	C5:1	sample0015_134714	8000086564	Initial	MRM+	244.20/85.00	Qualifier	C5 IS	0	0.025	6456	305	0	0	389824	10522	Savitzky-Golay,7,2	0.13/0.80	0.176	NBS: ISConc=-1; Initial: LimitLow=0, LimitHigh=0.15; Retest: LimitLow=0, LimitHigh=0.15; Recall: LimitLow=0, LimitHigh=0.15; Recall retest: LimitLow=0, LimitHigh=0.15	Peak Area	0.075	0	0.15
HIE with sampling at different times (A)	HIE-6h	ESI1	1	C5DC\C6OH	sample0015_134714	8000086564	Initial	MRM+	276.20/85.00	Qualifier	C5DC\C6OH IS	0	0.026	2264	171	0	0	127907	3768	Savitzky-Golay,7,2	0.13/0.80	0.411	NBS: ISConc=1.49; Initial: LimitLow=0, LimitHigh=0.3; Retest: LimitLow=0, LimitHigh=0.3; Recall: LimitLow=0, LimitHigh=0.3; Recall retest: LimitLow=0, LimitHigh=0.3; LC: TargetConc=0.39, Stdev=0.09; HC: TargetConc=1.98, Stdev=0.24	Peak Area	0.15	0	0.3
HIE with sampling at different times (A)	HIE-6h	ESI1	1	C5DC\C6OH IS	sample0015_134714	8000086564	Initial	MRM+	282.20/85.00	IS		1.49	0	127907	3768	0	0	0	0	Savitzky-Golay,7,2	0.13/0.80	0.763	NBS: Internal Standard;	Peak Area	0	0	0
HIE with sampling at different times (A)	HIE-6h	ESI1	1	C6	sample0015_134714	8000086564	Initial	MRM+	260.20/85.00	Qualifier	C6 IS	0	0.006	1481	91	0	0	293254	7717	Savitzky-Golay,7,2	0.13/0.80	0.763	NBS: ISConc=1.03; Initial: LimitLow=0, LimitHigh=0.2; Retest: LimitLow=0, LimitHigh=0.2; Recall: LimitLow=0, LimitHigh=0.2; Recall retest: LimitLow=0, LimitHigh=0.2; LC: TargetConc=0.29, Stdev=0.09; HC: TargetConc=1.4, Stdev=0.17	Peak Area	0.1	0	0.2
HIE with sampling at different times (A)	HIE-6h	ESI1	1	C6 IS	sample0015_134714	8000086564	Initial	MRM+	263.20/85.00	IS		1.03	0	293254	7717	0	0	0	0	Savitzky-Golay,7,2	0.13/0.80	0.205	NBS: Internal Standard;	Peak Area	0	0	0
HIE with sampling at different times (A)	HIE-6h	ESI1	1	C6DC	sample0015_134714	8000086564	Initial	MRM+	290.20/85.00	Qualifier	C5DC\C6OH IS	0	0.05	4308	182	0	0	127907	3768	Savitzky-Golay,7,2	0.13/0.80	0.469	NBS: ISConc=-1;	Peak Area	0	0	0
HIE with sampling at different times (A)	HIE-6h	ESI1	1	C8	sample0015_134714	8000086564	Initial	MRM+	288.20/85.00	Qualifier	C8 IS	0	0.056	14610	516	0	0	274119	8286	Savitzky-Golay,7,2	0.13/0.80	0.499	NBS: ISConc=1.04; Initial: LimitLow=0, LimitHigh=0.4; Retest: LimitLow=0, LimitHigh=0.4; Recall: LimitLow=0, LimitHigh=0.4; Recall retest: LimitLow=0, LimitHigh=0.4; LC: TargetConc=0.55, Stdev=0.08; HC: TargetConc=2.76, Stdev=0.33	Peak Area	0.2	0	0.4
HIE with sampling at different times (A)	HIE-6h	ESI1	1	C8 IS	sample0015_134714	8000086564	Initial	MRM+	291.20/85.00	IS		1.04	0	274119	8286	0	0	0	0	Savitzky-Golay,7,2	0.13/0.80	0.176	NBS: Internal Standard;	Peak Area	0	0	0
HIE with sampling at different times (A)	HIE-6h	ESI1	1	C8:1	sample0015_134714	8000086564	Initial	MRM+	286.20/85.00	Qualifier	C8 IS	0	0.004	1169	102	0	0	274119	8286	Savitzky-Golay,7,2	0.13/0.80	0.557	NBS: ISConc=-1;	Peak Area	0	0	0
HIE with sampling at different times (A)	HIE-6h	ESI1	1	C10	sample0015_134714	8000086564	Initial	MRM+	316.20/85.00	Qualifier	C10 IS	0	0.078	22546	762	0	0	314474	9143	Savitzky-Golay,7,2	0.13/0.80	0.763	NBS: ISConc=0.91; Initial: LimitLow=0, LimitHigh=0.29; Retest: LimitLow=0, LimitHigh=0.29; Recall: LimitLow=0, LimitHigh=0.29; Recall retest: LimitLow=0, LimitHigh=0.29; LC: TargetConc=0.31, Stdev=0.09; HC: TargetConc=2.02, Stdev=0.24	Peak Area	0.145	0	0.29
HIE with sampling at different times (A)	HIE-6h	ESI1	1	C10 IS	sample0015_134714	8000086564	Initial	MRM+	319.30/85.00	IS		0.91	0	314474	9143	0	0	0	0	Savitzky-Golay,7,2	0.13/0.80	0.205	NBS: Internal Standard;	Peak Area	0	0	0
HIE with sampling at different times (A)	HIE-6h	ESI1	1	C10:1	sample0015_134714	8000086564	Initial	MRM+	314.20/85.00	Qualifier	C10 IS	0	0.014	4682	304	0	0	314474	9143	Savitzky-Golay,7,2	0.13/0.80	0.704	NBS: ISConc=-1; Initial: LimitLow=0, LimitHigh=0.3; Retest: LimitLow=0, LimitHigh=0.3; Recall: LimitLow=0, LimitHigh=0.3; Recall retest: LimitLow=0, LimitHigh=0.3	Peak Area	0.15	0	0.3
HIE with sampling at different times (A)	HIE-6h	ESI1	1	C10:2	sample0015_134714	8000086564	Initial	MRM+	312.20/85.00	Qualifier	C10 IS	0	0.002	658	76	0	0	314474	9143	Savitzky-Golay,7,2	0.13/0.80	0.147	NBS: ISConc=-1; Initial: LimitLow=0, LimitHigh=100; Retest: LimitLow=0, LimitHigh=100; Recall: LimitLow=0, LimitHigh=100; Recall retest: LimitLow=0, LimitHigh=100	Peak Area	50	0	100
HIE with sampling at different times (A)	HIE-6h	ESI1	1	C12	sample0015_134714	8000086564	Initial	MRM+	344.30/85.00	Qualifier	C12 IS	0	0.139	53105	1700	0	0	397227	10973	Savitzky-Golay,7,2	0.13/0.80	0.147	NBS: ISConc=1; Initial: LimitLow=0, LimitHigh=0.33; Retest: LimitLow=0, LimitHigh=0.33; Recall: LimitLow=0, LimitHigh=0.33; Recall retest: LimitLow=0, LimitHigh=0.33; LC: TargetConc=0.28, Stdev=0.09; HC: TargetConc=1.36, Stdev=0.16	Peak Area	0.165	0	0.33
HIE with sampling at different times (A)	HIE-6h	ESI1	1	C12 IS	sample0015_134714	8000086564	Initial	MRM+	347.30/85.00	IS		1	0	397227	10973	0	0	0	0	Savitzky-Golay,7,2	0.13/0.80	0.176	NBS: Internal Standard;	Peak Area	0	0	0
HIE with sampling at different times (A)	HIE-6h	ESI1	1	C12:1	sample0015_134714	8000086564	Initial	MRM+	342.30/85.00	Qualifier	C12 IS	0	0.015	5802	225	0	0	397227	10973	Savitzky-Golay,7,2	0.13/0.80	0.323	NBS: ISConc=-1; Initial: LimitLow=0, LimitHigh=1000; Retest: LimitLow=0, LimitHigh=1000; Recall: LimitLow=0, LimitHigh=1000; Recall retest: LimitLow=0, LimitHigh=10000	Peak Area	500	0	1000
HIE with sampling at different times (A)	HIE-6h	ESI1	1	C14	sample0015_134714	8000086564	Initial	MRM+	372.30/85.00	Qualifier	C14 IS	0	0.373	168863	5004	0	0	494308	13858	Savitzky-Golay,7,2	0.13/0.80	0.176	NBS: ISConc=1.02; Initial: LimitLow=0, LimitHigh=0.59; Retest: LimitLow=0, LimitHigh=0.59; Recall: LimitLow=0, LimitHigh=0.59; Recall retest: LimitLow=0, LimitHigh=0.59; LC: TargetConc=0.33, Stdev=0.09; HC: TargetConc=1.9, Stdev=0.23	Peak Area	0.295	0	0.59
HIE with sampling at different times (A)	HIE-6h	ESI1	1	C14 IS	sample0015_134714	8000086564	Initial	MRM+	375.30/85.00	IS		1.02	0	494308	13858	0	0	0	0	Savitzky-Golay,7,2	0.13/0.80	0.176	NBS: Internal Standard;	Peak Area	0	0	0
HIE with sampling at different times (A)	HIE-6h	ESI1	1	C14:1	sample0015_134714	8000086564	Initial	MRM+	370.30/85.00	Qualifier	C14 IS	0	0.043	20913	663	0	0	494308	13858	Savitzky-Golay,7,2	0.13/0.80	0.733	NBS: ISConc=-1; Initial: LimitLow=0, LimitHigh=0.32; Retest: LimitLow=0, LimitHigh=0.32; Recall: LimitLow=0, LimitHigh=0.32; Recall retest: LimitLow=0, LimitHigh=0.32	Peak Area	0.16	0	0.32
HIE with sampling at different times (A)	HIE-6h	ESI1	1	C14:2	sample0015_134714	8000086564	Initial	MRM+	368.30/85.00	Qualifier	C14 IS	0	0.003	1578	87	0	0	494308	13858	Savitzky-Golay,7,2	0.13/0.80	0.264	NBS: ISConc=-1;	Peak Area	0	0	0
HIE with sampling at different times (A)	HIE-6h	ESI1	1	C14OH	sample0015_134714	8000086564	Initial	MRM+	388.30/85.00	Qualifier	C14 IS	0	0	0	0	0	0	494308	13858	Savitzky-Golay,7,2	0.13/0.80	0.763	NBS: ISConc=-1; Initial: LimitLow=0, LimitHigh=0.2; Retest: LimitLow=0, LimitHigh=0.2; Recall: LimitLow=0, LimitHigh=0.2; Recall retest: LimitLow=0, LimitHigh=0.2	Peak Area	0.1	0	0.2
HIE with sampling at different times (A)	HIE-6h	ESI1	1	C16	sample0015_134714	8000086564	Initial	MRM+	400.30/85.00	Qualifier	C16 IS	0	1.948	950722	24912	0	0	464795	13145	Savitzky-Golay,7,2	0.13/0.80	0.176	NBS: ISConc=0.89; Initial: LimitLow=0.3, LimitHigh=8.5; Retest: LimitLow=0.3, LimitHigh=8.5; Recall: LimitLow=0.3, LimitHigh=8.5; Recall retest: LimitLow=0.3, LimitHigh=8.5; LC: TargetConc=2.02, Stdev=0.24; HC: TargetConc=11.7, Stdev=1.4	Peak Area	4.4	0.3	8.5
HIE with sampling at different times (A)	HIE-6h	ESI1	1	C16 IS	sample0015_134714	8000086564	Initial	MRM+	403.40/85.00	IS		0.89	0	464795	13145	0	0	0	0	Savitzky-Golay,7,2	0.13/0.80	0.147	NBS: Internal Standard;	Peak Area	0	0	0
HIE with sampling at different times (A)	HIE-6h	ESI1	1	C16:1	sample0015_134714	8000086564	Initial	MRM+	398.30/85.00	Qualifier	C16 IS	0	0.065	33771	1111	0	0	464795	13145	Savitzky-Golay,7,2	0.13/0.80	0.235	NBS: ISConc=-1;	Peak Area	0	0	0
HIE with sampling at different times (A)	HIE-6h	ESI1	1	C16OH	sample0015_134714	8000086564	Initial	MRM+	416.30/85.00	Qualifier	C16 IS	0	0.022	11638	338	0	0	464795	13145	Savitzky-Golay,7,2	0.13/0.80	0.323	NBS: ISConc=-1; Initial: LimitLow=0, LimitHigh=0.19; Retest: LimitLow=0, LimitHigh=0.19; Recall: LimitLow=0, LimitHigh=0.19; Recall retest: LimitLow=0, LimitHigh=0.19	Peak Area	0.095	0	0.19
HIE with sampling at different times (A)	HIE-6h	ESI1	1	C16:1OH\C17	sample0015_134714	8000086564	Initial	MRM+	414.30/85.00	Qualifier	C16 IS	0	0.071	36961	1145	0	0	464795	13145	Savitzky-Golay,7,2	0.13/0.80	0.176	NBS: ISConc=-1; Initial: LimitLow=0, LimitHigh=0.22; Retest: LimitLow=0, LimitHigh=0.22; Recall: LimitLow=0, LimitHigh=0.22; Recall retest: LimitLow=0, LimitHigh=0.22	Peak Area	0.11	0	0.22
HIE with sampling at different times (A)	HIE-6h	ESI1	1	C18	sample0015_134714	8000086564	Initial	MRM+	428.40/85.00	Qualifier	C18 IS	0	0.569	282624	7783	0	0	553086	15467	Savitzky-Golay,7,2	0.13/0.80	0.323	NBS: ISConc=0.92; Initial: LimitLow=0.13, LimitHigh=2.5; Retest: LimitLow=0.13, LimitHigh=2.5; Recall: LimitLow=0.13, LimitHigh=2.5; Recall retest: LimitLow=0.13, LimitHigh=2.5; LC: TargetConc=1.14, Stdev=0.14; HC: TargetConc=4.32, Stdev=0.52	Peak Area	1.315	0.13	2.5
HIE with sampling at different times (A)	HIE-6h	ESI1	1	C18 IS	sample0015_134714	8000086564	Initial	MRM+	431.40/85.00	IS		0.92	0	553086	15467	0	0	0	0	Savitzky-Golay,7,2	0.13/0.80	0.205	NBS: Internal Standard;	Peak Area	0	0	0
HIE with sampling at different times (A)	HIE-6h	ESI1	1	C18:1	sample0015_134714	8000086564	Initial	MRM+	426.40/85.00	Qualifier	C18 IS	0	0.848	510095	14236	0	0	553086	15467	Savitzky-Golay,7,2	0.13/0.80	0.205	NBS: ISConc=-1; Initial: LimitLow=0.15, LimitHigh=3.35; Retest: LimitLow=0.15, LimitHigh=3.35; Recall: LimitLow=0.15, LimitHigh=3.35; Recall retest: LimitLow=0.15, LimitHigh=3.35	Peak Area	1.75	0.15	3.35
HIE with sampling at different times (A)	HIE-6h	ESI1	1	C18:2	sample0015_134714	8000086564	Initial	MRM+	424.30/85.00	Qualifier	C18 IS	0	0.007	4116	183	0	0	553086	15467	Savitzky-Golay,7,2	0.13/0.80	0.528	NBS: ISConc=-1;	Peak Area	0	0	0
HIE with sampling at different times (A)	HIE-6h	ESI1	1	C18OH	sample0015_134714	8000086564	Initial	MRM+	444.40/85.00	Qualifier	C18 IS	0	0.018	10605	414	0	0	553086	15467	Savitzky-Golay,7,2	0.13/0.80	0.645	NBS: ISConc=-1; Initial: LimitLow=0, LimitHigh=0.14; Retest: LimitLow=0, LimitHigh=0.14; Recall: LimitLow=0, LimitHigh=0.14; Recall retest: LimitLow=0, LimitHigh=0.14	Peak Area	0.07	0	0.14
HIE with sampling at different times (A)	HIE-6h	ESI1	1	C18:1OH	sample0015_134714	8000086564	Initial	MRM+	442.40/85.00	Qualifier	C18 IS	0	0.046	27466	887	0	0	553086	15467	Savitzky-Golay,7,2	0.13/0.80	0.176	NBS: ISConc=-1; Initial: LimitLow=0, LimitHigh=0.16; Retest: LimitLow=0, LimitHigh=0.16; Recall: LimitLow=0, LimitHigh=0.16; Recall retest: LimitLow=0, LimitHigh=0.16	Peak Area	0.08	0	0.16
HIE with sampling at different times (A)	HIE-6h	ESI1	1	C18:2OH	sample0015_134714	8000086564	Initial	MRM+	440.30/85.00	Qualifier	C18 IS	0	0.093	55806	1645	0	0	553086	15467	Savitzky-Golay,7,2	0.13/0.80	0.176	NBS: ISConc=-1;	Peak Area	0	0	0
HIE with sampling at different times (A)	HIE-6h	ESI1	1	C20	sample0015_134714	8000086564	Initial	MRM+	456.40/85.00	Qualifier	C26 IS	0	0.029	23843	898	0	0	882763	22664	Savitzky-Golay,7,2	0.13/0.80	0.147	NBS: ISConc=-1;	Peak Area	0	0	0
HIE with sampling at different times (A)	HIE-6h	ESI1	1	C22	sample0015_134714	8000086564	Initial	MRM+	484.40/85.00	Qualifier	C26 IS	0	0.014	11614	550	0	0	882763	22664	Savitzky-Golay,7,2	0.13/0.80	0.147	NBS: ISConc=-1;	Peak Area	0	0	0
HIE with sampling at different times (A)	HIE-6h	ESI1	1	C24	sample0015_134714	8000086564	Initial	MRM+	512.50/85.00	Qualifier	C26 IS	0	0.044	35601	1201	0	0	882763	22664	Savitzky-Golay,7,2	0.13/0.80	0.381	NBS: ISConc=-1;	Peak Area	0	0	0
HIE with sampling at different times (A)	HIE-6h	ESI1	1	C26	sample0015_134714	8000086564	Initial	MRM+	540.50/85.00	Qualifier	C26 IS	0	0.006	4543	218	0	0	882763	22664	Savitzky-Golay,7,2	0.13/0.80	0.147	NBS: ISConc=1.09; LC: TargetConc=0.61, Stdev=0.09; HC: TargetConc=1.66, Stdev=0.2	Peak Area	0	0	0
HIE with sampling at different times (A)	HIE-6h	ESI1	1	C26 IS	sample0015_134714	8000086564	Initial	MRM+	543.50/85.00	IS		1.09	0	882763	22664	0	0	0	0	Savitzky-Golay,7,2	0.13/0.80	0.557	NBS: Internal Standard;	Peak Area	0	0	0
HIE with sampling at different times (A)	HIE-6h	ESI1	1	SA	sample0015_134714	8000086564	Initial	MRM+	155.10/109.10	Qualifier	SA IS	0	0.379	10186	319	0	0	1563524	42046	Savitzky-Golay,7,2	0.13/0.80	0.147	NBS: ISConc=58.1; Initial: LimitLow=0, LimitHigh=2; Retest: LimitLow=0, LimitHigh=2; Recall: LimitLow=0, LimitHigh=2; Recall retest: LimitLow=0, LimitHigh=2; LC: TargetConc=2.57, Stdev=0.38; HC: TargetConc=10.4, Stdev=1.2	Peak Area	1	0	2
HIE with sampling at different times (A)	HIE-6h	ESI1	1	SA IS	sample0015_134714	8000086564	Initial	MRM+	160.10/114.10	IS		58.1	0	1563524	42046	0	0	0	0	Savitzky-Golay,7,2	0.13/0.80	0.528	NBS: Internal Standard;	Peak Area	0	0	0
HIE with sampling at different times (A)	HIE-6h	ESI1	1	ADO	sample0015_134714	8000086564	Initial	MRM+	268.10/136.10	Qualifier	ADO IS	0	0.216	17595	622	0	0	538429	16567	Savitzky-Golay,7,2	0.13/0.80	0.264	NBS: ISConc=9.44; LC: TargetConc=2.51, Stdev=0.34; HC: TargetConc=6.91, Stdev=0.83	Peak Area	0	0	0
HIE with sampling at different times (A)	HIE-6h	ESI1	1	ADO IS	sample0015_134714	8000086564	Initial	MRM+	273.10/136.10	IS		9.44	0	538429	16567	0	0	0	0	Savitzky-Golay,7,2	0.13/0.80	0.205	NBS: Internal Standard;	Peak Area	0	0	0
HIE with sampling at different times (A)	HIE-6h	ESI1	1	D-ADO	sample0015_134714	8000086564	Initial	MRM+	252.10/136.10	Qualifier	D-ADO IS	0	0.028	1805	150	0	0	630233	19821	Savitzky-Golay,7,2	0.13/0.80	0.675	NBS: ISConc=9.82;	Peak Area	0	0	0
HIE with sampling at different times (A)	HIE-6h	ESI1	1	D-ADO IS	sample0015_134714	8000086564	Initial	MRM+	257.10/136.10	IS		9.82	0	630233	19821	0	0	0	0	Savitzky-Golay,7,2	0.13/0.80	0.176	NBS: Internal Standard;	Peak Area	0	0	0
HIE with sampling at different times (A)	HIE-6h	ESI1	1	C20:0-LPC	sample0015_134714	8000086564	Initial	MRM+	552.40/104.10	Qualifier	C26:0-LPC IS	0	1.426	82954	2447	0	0	255998	7108	Savitzky-Golay,7,2	0.13/0.80	0.293	NBS: ISConc=-1;	Peak Area	0	0	0
HIE with sampling at different times (A)	HIE-6h	ESI1	1	C22:0-LPC	sample0015_134714	8000086564	Initial	MRM+	580.40/104.10	Qualifier	C26:0-LPC IS	0	1.09	63426	2091	0	0	255998	7108	Savitzky-Golay,7,2	0.13/0.80	0.352	NBS: ISConc=-1;	Peak Area	0	0	0
HIE with sampling at different times (A)	HIE-6h	ESI1	1	C24:0-LPC	sample0015_134714	8000086564	Initial	MRM+	608.50/104.10	Qualifier	C26:0-LPC IS	0	1.668	97023	2888	0	0	255998	7108	Savitzky-Golay,7,2	0.13/0.80	0.528	NBS: ISConc=-1;	Peak Area	0	0	0
HIE with sampling at different times (A)	HIE-6h	ESI1	1	C26:0-LPC	sample0015_134714	8000086564	Initial	MRM+	636.50/104.10	Qualifier	C26:0-LPC IS	0	0.352	22770	783	0	0	255998	7108	Savitzky-Golay,7,2	0.13/0.80	0.147	NBS: ISConc=4.4; LC: TargetConc=0.92, Stdev=0.11; HC: TargetConc=3.04, Stdev=0.36	Peak Area	0	0	0
HIE with sampling at different times (A)	HIE-6h	ESI1	1	C26:0-LPC IS	sample0015_134714	8000086564	Initial	MRM+	640.50/104.10	IS		4.4	0	255998	7108	0	0	0	0	Savitzky-Golay,7,2	0.13/0.80	0.352	NBS: Internal Standard;	Peak Area	0	0	0
HIE with sampling at different times (A)	HIE-6h	ESI1	1	ASA	sample0015_134714	8000086564	Initial	MRM+	291.10/70.10	Qualifier	Arg IS	0	1.232	26184	810	0	0	1007376	27712	Savitzky-Golay,7,2	0.13/0.80	0.205	NBS: --	Peak Area	0	0	0
HIE with sampling at different times (A)	HIE-6h	ESI1	1	ASA anhydride I + II	sample0015_134714	8000086564	Initial	MRM+	273.10/70.10	Qualifier	Arg IS	0	0.356	7573	358	0	0	1007376	27712	Savitzky-Golay,7,2	0.13/0.80	0.205	NBS: --	Peak Area	0	0	0
HIE with sampling at different times (A)	HIE-6h			ASATotal	sample0015_134714	8000086564	Initial	N/A	0.00/0.00	Qualifier	Arg IS	0	1.604	33757	1168	0	0	1007376	27712	Savitzky-Golay,7,2	0.13/0.80	0	NBS: ISConc=-1; Initial: LimitLow=0, LimitHigh=1.5; Retest: LimitLow=0, LimitHigh=1.5; Recall: LimitLow=0, LimitHigh=1.5; Recall retest: LimitLow=0, LimitHigh=1.5; LC: TargetConc=2.22, Stdev=0.38; HC: TargetConc=39, Stdev=4.7	Peak Area	0.75	0	1.5
HIE with sampling at different times (A)	HIE-3h	ESI1	1	Ala	sample0021_135739	8000086430	Initial	MRM+	90.10/44.00	Qualifier	Ala IS	0	509.577	1083874	31698	0	0	291081	8313	Savitzky-Golay,7,2	0.13/0.80	0.205	NBS: ISConc=115; Initial: LimitLow=0, LimitHigh=10000; Retest: LimitLow=0, LimitHigh=10000; Recall: LimitLow=0, LimitHigh=10000; Recall retest: LimitLow=0, LimitHigh=10000; LC: TargetConc=479, Stdev=57; HC: TargetConc=967, Stdev=116	Peak Area	5000	0	10000
HIE with sampling at different times (A)	HIE-3h	ESI1	1	Ala IS	sample0021_135739	8000086430	Initial	MRM+	93.10/47.10	IS		115	0	291081	8313	0	0	0	0	Savitzky-Golay,7,2	0.13/0.80	0.733	NBS: Internal Standard;	Peak Area	0	0	0
HIE with sampling at different times (A)	HIE-3h	ESI1	1	Arg	sample0021_135739	8000086430	Initial	MRM+	175.10/70.10	Qualifier	Arg IS	0	132.997	2772954	73953	0	0	998158	27093	Savitzky-Golay,7,2	0.13/0.80	0.557	NBS: ISConc=47.4; Initial: LimitLow=0, LimitHigh=70; Retest: LimitLow=0, LimitHigh=70; Recall: LimitLow=0, LimitHigh=70; Recall retest: LimitLow=0, LimitHigh=70; LC: TargetConc=24.2, Stdev=2.9; HC: TargetConc=136, Stdev=16	Peak Area	35	0	70
HIE with sampling at different times (A)	HIE-3h	ESI1	1	Arg IS	sample0021_135739	8000086430	Initial	MRM+	180.10/75.10	IS		47.4	0	998158	27093	0	0	0	0	Savitzky-Golay,7,2	0.13/0.80	0.381	NBS: Internal Standard;	Peak Area	0	0	0
HIE with sampling at different times (A)	HIE-3h	ESI1	1	Cit	sample0021_135739	8000086430	Initial	MRM+	176.10/113.10	Qualifier	Cit IS	0	48.411	150892	4139	0	0	288109	7942	Savitzky-Golay,7,2	0.13/0.80	0.557	NBS: ISConc=81.8; Initial: LimitLow=0, LimitHigh=80; Retest: LimitLow=0, LimitHigh=80; Recall: LimitLow=0, LimitHigh=80; Recall retest: LimitLow=0, LimitHigh=80; LC: TargetConc=33.1, Stdev=4; HC: TargetConc=147, Stdev=18	Peak Area	40	0	80
HIE with sampling at different times (A)	HIE-3h	ESI1	1	Cit IS	sample0021_135739	8000086430	Initial	MRM+	178.10/115.10	IS		81.8	0	288109	7942	0	0	0	0	Savitzky-Golay,7,2	0.13/0.80	0.528	NBS: Internal Standard;	Peak Area	0	0	0
HIE with sampling at different times (A)	HIE-3h	ESI1	1	Gln\Lys	sample0021_135739	8000086430	Initial	MRM+	147.10/84.00	Qualifier	Gln\Lys IS	0	189.232	1100471	32944	0	0	519727	14077	Savitzky-Golay,7,2	0.13/0.80	0.205	NBS: ISConc=99.3; LC: TargetConc=635, Stdev=76; HC: TargetConc=1350, Stdev=160	Peak Area	0	0	0
HIE with sampling at different times (A)	HIE-3h	ESI1	1	Gln\Lys IS	sample0021_135739	8000086430	Initial	MRM+	152.10/88.10	IS		99.3	0	519727	14077	0	0	0	0	Savitzky-Golay,7,2	0.13/0.80	0.499	NBS: Internal Standard;	Peak Area	0	0	0
HIE with sampling at different times (A)	HIE-3h	ESI1	1	Glu	sample0021_135739	8000086430	Initial	MRM+	148.10/84.00	Qualifier	Gln\Lys IS	0	162.753	851834	23810	0	0	519727	14077	Savitzky-Golay,7,2	0.13/0.80	0.176	NBS: ISConc=-1;	Peak Area	0	0	0
HIE with sampling at different times (A)	HIE-3h	ESI1	1	Gly	sample0021_135739	8000086430	Initial	MRM+	76.00/30.00	Qualifier	Gly IS	0	403.806	329471	9249	0	0	487296	15559	Savitzky-Golay,7,2	0.13/0.80	0.352	NBS: ISConc=553; LC: TargetConc=549, Stdev=66; HC: TargetConc=1320, Stdev=160	Peak Area	0	0	0
HIE with sampling at different times (A)	HIE-3h	ESI1	1	Gly IS	sample0021_135739	8000086430	Initial	MRM+	78.00/32.00	IS		553	0	487296	15559	0	0	0	0	Savitzky-Golay,7,2	0.13/0.80	0.205	NBS: Internal Standard;	Peak Area	0	0	0
HIE with sampling at different times (A)	HIE-3h	ESI1	1	Leu\Ile\Pro-OH	sample0021_135739	8000086430	Initial	MRM+	132.10/86.10	Qualifier	Leu\Ile\Pro-OH IS	0	242.542	7164159	209442	0	0	3013152	86648	Savitzky-Golay,7,2	0.13/0.80	0.205	NBS: ISConc=101; Initial: LimitLow=0, LimitHigh=380; Retest: LimitLow=0, LimitHigh=380; Recall: LimitLow=0, LimitHigh=380; Recall retest: LimitLow=0, LimitHigh=380; LC: TargetConc=183, Stdev=22; HC: TargetConc=772, Stdev=93	Peak Area	190	0	380
HIE with sampling at different times (A)	HIE-3h	ESI1	1	Leu\Ile\Pro-OH IS	sample0021_135739	8000086430	Initial	MRM+	135.10/89.10	IS		101	0	3013152	86648	0	0	0	0	Savitzky-Golay,7,2	0.13/0.80	0.205	NBS: Internal Standard;	Peak Area	0	0	0
HIE with sampling at different times (A)	HIE-3h	ESI1	1	Met	sample0021_135739	8000086430	Initial	MRM+	150.10/104.10	Qualifier	Met IS	0	15.946	71259	2148	0	0	516827	14013	Savitzky-Golay,7,2	0.13/0.80	0.176	NBS: ISConc=99.7; Initial: LimitLow=7, LimitHigh=80; Retest: LimitLow=7, LimitHigh=80; Recall: LimitLow=7, LimitHigh=80; Recall retest: LimitLow=7, LimitHigh=80; LC: TargetConc=36, Stdev=4.3; HC: TargetConc=177, Stdev=21	Peak Area	43.5	7	80
HIE with sampling at different times (A)	HIE-3h	ESI1	1	Met IS	sample0021_135739	8000086430	Initial	MRM+	153.10/107.10	IS		99.7	0	516827	14013	0	0	0	0	Savitzky-Golay,7,2	0.13/0.80	0.176	NBS: Internal Standard;	Peak Area	0	0	0
HIE with sampling at different times (A)	HIE-3h	ESI1	1	Orn	sample0021_135739	8000086430	Initial	MRM+	133.10/70.10	Qualifier	Orn IS	0	16.518	114269	3612	0	0	754068	21214	Savitzky-Golay,7,2	0.13/0.80	0.176	NBS: ISConc=109; LC: TargetConc=154, Stdev=18; HC: TargetConc=488, Stdev=59	Peak Area	0	0	0
HIE with sampling at different times (A)	HIE-3h	ESI1	1	Orn IS	sample0021_135739	8000086430	Initial	MRM+	139.10/76.10	IS		109	0	754068	21214	0	0	0	0	Savitzky-Golay,7,2	0.13/0.80	0.176	NBS: Internal Standard;	Peak Area	0	0	0
HIE with sampling at different times (A)	HIE-3h	ESI1	1	Phe	sample0021_135739	8000086430	Initial	MRM+	166.10/120.10	Qualifier	Phe IS	0	54.777	2075044	56836	0	0	2937497	82728	Savitzky-Golay,7,2	0.13/0.80	0.205	NBS: ISConc=71.8; Initial: LimitLow=0, LimitHigh=120; Retest: LimitLow=0, LimitHigh=120; Recall: LimitLow=0, LimitHigh=120; Recall retest: LimitLow=0, LimitHigh=120; LC: TargetConc=79.4, Stdev=9.5; HC: TargetConc=264, Stdev=32	Peak Area	60	0	120
HIE with sampling at different times (A)	HIE-3h	ESI1	1	Phe IS	sample0021_135739	8000086430	Initial	MRM+	172.10/126.10	IS		71.8	0	2937497	82728	0	0	0	0	Savitzky-Golay,7,2	0.13/0.80	0.205	NBS: Internal Standard;	Peak Area	0	0	0
HIE with sampling at different times (A)	HIE-3h	ESI1	1	Pro	sample0021_135739	8000086430	Initial	MRM+	116.10/70.10	Qualifier	Pro IS	0	156.992	3672988	99593	0	0	1832371	49798	Savitzky-Golay,7,2	0.13/0.80	0.499	NBS: ISConc=88; LC: TargetConc=235, Stdev=28; HC: TargetConc=683, Stdev=82	Peak Area	0	0	0
HIE with sampling at different times (A)	HIE-3h	ESI1	1	Pro IS	sample0021_135739	8000086430	Initial	MRM+	121.10/74.10	IS		88	0	1832371	49798	0	0	0	0	Savitzky-Golay,7,2	0.13/0.80	0.205	NBS: Internal Standard;	Peak Area	0	0	0
HIE with sampling at different times (A)	HIE-3h	ESI1	1	Tyr	sample0021_135739	8000086430	Initial	MRM+	182.10/136.10	Qualifier	Tyr IS	0	130.69	934464	25889	0	0	1009970	29472	Savitzky-Golay,7,2	0.13/0.80	0.499	NBS: ISConc=113; LC: TargetConc=136, Stdev=16; HC: TargetConc=549, Stdev=66	Peak Area	0	0	0
HIE with sampling at different times (A)	HIE-3h	ESI1	1	Tyr IS	sample0021_135739	8000086430	Initial	MRM+	188.10/142.10	IS		113	0	1009970	29472	0	0	0	0	Savitzky-Golay,7,2	0.13/0.80	0.205	NBS: Internal Standard;	Peak Area	0	0	0
HIE with sampling at different times (A)	HIE-3h	ESI1	1	Val	sample0021_135739	8000086430	Initial	MRM+	118.10/72.10	Qualifier	Val IS	0	161.282	2737612	77682	0	0	2053179	60625	Savitzky-Golay,7,2	0.13/0.80	0.176	NBS: ISConc=108; LC: TargetConc=213, Stdev=26; HC: TargetConc=470, Stdev=56	Peak Area	0	0	0
HIE with sampling at different times (A)	HIE-3h	ESI1	1	Val IS	sample0021_135739	8000086430	Initial	MRM+	124.10/77.10	IS		108	0	2053179	60625	0	0	0	0	Savitzky-Golay,7,2	0.13/0.80	0.205	NBS: Internal Standard;	Peak Area	0	0	0
HIE with sampling at different times (A)	HIE-3h	ESI1	1	C0	sample0021_135739	8000086430	Initial	MRM+	162.10/103.00	Qualifier	C0 IS	0	24.308	636966	17609	0	0	385717	11136	Savitzky-Golay,7,2	0.13/0.80	0.469	NBS: ISConc=11.5; Initial: LimitLow=8, LimitHigh=90; Retest: LimitLow=8, LimitHigh=90; Recall: LimitLow=8, LimitHigh=90; Recall retest: LimitLow=8, LimitHigh=90; LC: TargetConc=41, Stdev=4.9; HC: TargetConc=151, Stdev=18	Peak Area	49	8	90
HIE with sampling at different times (A)	HIE-3h	ESI1	1	C0 IS	sample0021_135739	8000086430	Initial	MRM+	171.20/103.00	IS		11.5	0	385717	11136	0	0	0	0	Savitzky-Golay,7,2	0.13/0.80	0.528	NBS: Internal Standard;	Peak Area	0	0	0
HIE with sampling at different times (A)	HIE-3h	ESI1	1	C2	sample0021_135739	8000086430	Initial	MRM+	204.10/85.00	Qualifier	C2 IS	0	4.687	749659	20913	0	0	840973	23361	Savitzky-Golay,7,2	0.13/0.80	0.528	NBS: ISConc=4.78; Initial: LimitLow=0, LimitHigh=115; Retest: LimitLow=0, LimitHigh=115; Recall: LimitLow=0, LimitHigh=115; Recall retest: LimitLow=0, LimitHigh=115; LC: TargetConc=27.6, Stdev=3.3; HC: TargetConc=82.4, Stdev=9.9	Peak Area	57.5	0	115
HIE with sampling at different times (A)	HIE-3h	ESI1	1	C2 IS	sample0021_135739	8000086430	Initial	MRM+	207.10/85.00	IS		4.78	0	840973	23361	0	0	0	0	Savitzky-Golay,7,2	0.13/0.80	0.733	NBS: Internal Standard;	Peak Area	0	0	0
HIE with sampling at different times (A)	HIE-3h	ESI1	1	C3	sample0021_135739	8000086430	Initial	MRM+	218.10/85.00	Qualifier	C3 IS	0	0.13	24990	776	0	0	388800	10673	Savitzky-Golay,7,2	0.13/0.80	0.352	NBS: ISConc=2.03; Initial: LimitLow=0, LimitHigh=6.8; Retest: LimitLow=0, LimitHigh=6.8; Recall: LimitLow=0, LimitHigh=6.8; Recall retest: LimitLow=0, LimitHigh=6.8; LC: TargetConc=4.63, Stdev=0.56; HC: TargetConc=13.3, Stdev=1.6	Peak Area	3.4	0	6.8
HIE with sampling at different times (A)	HIE-3h	ESI1	1	C3 IS	sample0021_135739	8000086430	Initial	MRM+	221.20/85.00	IS		2.03	0	388800	10673	0	0	0	0	Savitzky-Golay,7,2	0.13/0.80	0.763	NBS: Internal Standard;	Peak Area	0	0	0
HIE with sampling at different times (A)	HIE-3h	ESI1	1	C3DC\C4OH	sample0021_135739	8000086430	Initial	MRM+	248.10/85.00	Qualifier	C4 IS	0	0.156	38099	1074	0	0	354016	9765	Savitzky-Golay,7,2	0.13/0.80	0.469	NBS: ISConc=-1; Initial: LimitLow=0, LimitHigh=10; Retest: LimitLow=0.04, LimitHigh=10; Recall: LimitLow=0.04, LimitHigh=10; Recall retest: LimitLow=0.04, LimitHigh=10	Peak Area	5	0	10
HIE with sampling at different times (A)	HIE-3h	ESI1	1	C4	sample0021_135739	8000086430	Initial	MRM+	232.20/85.00	Qualifier	C4 IS	0	0.043	10513	417	0	0	354016	9765	Savitzky-Golay,7,2	0.13/0.80	0.528	NBS: ISConc=1.45; Initial: LimitLow=0, LimitHigh=1.5; Retest: LimitLow=0, LimitHigh=1.5; Recall: LimitLow=0, LimitHigh=1.5; Recall retest: LimitLow=0, LimitHigh=1.5; LC: TargetConc=0.74, Stdev=0.1; HC: TargetConc=2.74, Stdev=0.33	Peak Area	0.75	0	1.5
HIE with sampling at different times (A)	HIE-3h	ESI1	1	C4 IS	sample0021_135739	8000086430	Initial	MRM+	235.20/85.00	IS		1.45	0	354016	9765	0	0	0	0	Savitzky-Golay,7,2	0.13/0.80	0.499	NBS: Internal Standard;	Peak Area	0	0	0
HIE with sampling at different times (A)	HIE-3h	ESI1	1	C4DC\C5OH	sample0021_135739	8000086430	Initial	MRM+	262.20/85.00	Qualifier	C5 IS	0	0.03	7159	249	0	0	366196	10478	Savitzky-Golay,7,2	0.13/0.80	0.235	NBS: ISConc=-1; Initial: LimitLow=0, LimitHigh=0.5; Retest: LimitLow=0, LimitHigh=0.5; Recall: LimitLow=0, LimitHigh=0.5; Recall retest: LimitLow=0, LimitHigh=0.5	Peak Area	0.25	0	0.5
HIE with sampling at different times (A)	HIE-3h	ESI1	1	C5	sample0021_135739	8000086430	Initial	MRM+	246.20/85.00	Qualifier	C5 IS	0	0.029	7248	336	0	0	366196	10478	Savitzky-Golay,7,2	0.13/0.80	0.264	NBS: ISConc=1.52; Initial: LimitLow=0, LimitHigh=0.56; Retest: LimitLow=0, LimitHigh=0.56; Recall: LimitLow=0, LimitHigh=0.56; Recall retest: LimitLow=0, LimitHigh=0.56; LC: TargetConc=0.63, Stdev=0.08; HC: TargetConc=2.46, Stdev=0.3	Peak Area	0.28	0	0.56
HIE with sampling at different times (A)	HIE-3h	ESI1	1	C5 IS	sample0021_135739	8000086430	Initial	MRM+	255.20/85.00	IS		1.52	0	366196	10478	0	0	0	0	Savitzky-Golay,7,2	0.13/0.80	0.323	NBS: Internal Standard;	Peak Area	0	0	0
HIE with sampling at different times (A)	HIE-3h	ESI1	1	C5:1	sample0021_135739	8000086430	Initial	MRM+	244.20/85.00	Qualifier	C5 IS	0	0.024	5734	211	0	0	366196	10478	Savitzky-Golay,7,2	0.13/0.80	0.616	NBS: ISConc=-1; Initial: LimitLow=0, LimitHigh=0.15; Retest: LimitLow=0, LimitHigh=0.15; Recall: LimitLow=0, LimitHigh=0.15; Recall retest: LimitLow=0, LimitHigh=0.15	Peak Area	0.075	0	0.15
HIE with sampling at different times (A)	HIE-3h	ESI1	1	C5DC\C6OH	sample0021_135739	8000086430	Initial	MRM+	276.20/85.00	Qualifier	C5DC\C6OH IS	0	0.034	2679	120	0	0	118901	3502	Savitzky-Golay,7,2	0.13/0.80	0.235	NBS: ISConc=1.49; Initial: LimitLow=0, LimitHigh=0.3; Retest: LimitLow=0, LimitHigh=0.3; Recall: LimitLow=0, LimitHigh=0.3; Recall retest: LimitLow=0, LimitHigh=0.3; LC: TargetConc=0.39, Stdev=0.09; HC: TargetConc=1.98, Stdev=0.24	Peak Area	0.15	0	0.3
HIE with sampling at different times (A)	HIE-3h	ESI1	1	C5DC\C6OH IS	sample0021_135739	8000086430	Initial	MRM+	282.20/85.00	IS		1.49	0	118901	3502	0	0	0	0	Savitzky-Golay,7,2	0.13/0.80	0.763	NBS: Internal Standard;	Peak Area	0	0	0
HIE with sampling at different times (A)	HIE-3h	ESI1	1	C6	sample0021_135739	8000086430	Initial	MRM+	260.20/85.00	Qualifier	C6 IS	0	0.004	1187	76	0	0	301916	8421	Savitzky-Golay,7,2	0.13/0.80	0.528	NBS: ISConc=1.03; Initial: LimitLow=0, LimitHigh=0.2; Retest: LimitLow=0, LimitHigh=0.2; Recall: LimitLow=0, LimitHigh=0.2; Recall retest: LimitLow=0, LimitHigh=0.2; LC: TargetConc=0.29, Stdev=0.09; HC: TargetConc=1.4, Stdev=0.17	Peak Area	0.1	0	0.2
HIE with sampling at different times (A)	HIE-3h	ESI1	1	C6 IS	sample0021_135739	8000086430	Initial	MRM+	263.20/85.00	IS		1.03	0	301916	8421	0	0	0	0	Savitzky-Golay,7,2	0.13/0.80	0.205	NBS: Internal Standard;	Peak Area	0	0	0
HIE with sampling at different times (A)	HIE-3h	ESI1	1	C6DC	sample0021_135739	8000086430	Initial	MRM+	290.20/85.00	Qualifier	C5DC\C6OH IS	0	0.013	1049	98	0	0	118901	3502	Savitzky-Golay,7,2	0.13/0.80	0.411	NBS: ISConc=-1;	Peak Area	0	0	0
HIE with sampling at different times (A)	HIE-3h	ESI1	1	C8	sample0021_135739	8000086430	Initial	MRM+	288.20/85.00	Qualifier	C8 IS	0	0.061	15895	486	0	0	275771	7854	Savitzky-Golay,7,2	0.13/0.80	0.176	NBS: ISConc=1.04; Initial: LimitLow=0, LimitHigh=0.4; Retest: LimitLow=0, LimitHigh=0.4; Recall: LimitLow=0, LimitHigh=0.4; Recall retest: LimitLow=0, LimitHigh=0.4; LC: TargetConc=0.55, Stdev=0.08; HC: TargetConc=2.76, Stdev=0.33	Peak Area	0.2	0	0.4
HIE with sampling at different times (A)	HIE-3h	ESI1	1	C8 IS	sample0021_135739	8000086430	Initial	MRM+	291.20/85.00	IS		1.04	0	275771	7854	0	0	0	0	Savitzky-Golay,7,2	0.13/0.80	0.176	NBS: Internal Standard;	Peak Area	0	0	0
HIE with sampling at different times (A)	HIE-3h	ESI1	1	C8:1	sample0021_135739	8000086430	Initial	MRM+	286.20/85.00	Qualifier	C8 IS	0	0.009	2275	116	0	0	275771	7854	Savitzky-Golay,7,2	0.13/0.80	0.323	NBS: ISConc=-1;	Peak Area	0	0	0
HIE with sampling at different times (A)	HIE-3h	ESI1	1	C10	sample0021_135739	8000086430	Initial	MRM+	316.20/85.00	Qualifier	C10 IS	0	0.135	39587	1231	0	0	320336	9177	Savitzky-Golay,7,2	0.13/0.80	0.147	NBS: ISConc=0.91; Initial: LimitLow=0, LimitHigh=0.29; Retest: LimitLow=0, LimitHigh=0.29; Recall: LimitLow=0, LimitHigh=0.29; Recall retest: LimitLow=0, LimitHigh=0.29; LC: TargetConc=0.31, Stdev=0.09; HC: TargetConc=2.02, Stdev=0.24	Peak Area	0.145	0	0.29
HIE with sampling at different times (A)	HIE-3h	ESI1	1	C10 IS	sample0021_135739	8000086430	Initial	MRM+	319.30/85.00	IS		0.91	0	320336	9177	0	0	0	0	Savitzky-Golay,7,2	0.13/0.80	0.176	NBS: Internal Standard;	Peak Area	0	0	0
HIE with sampling at different times (A)	HIE-3h	ESI1	1	C10:1	sample0021_135739	8000086430	Initial	MRM+	314.20/85.00	Qualifier	C10 IS	0	0.025	8810	345	0	0	320336	9177	Savitzky-Golay,7,2	0.13/0.80	0.205	NBS: ISConc=-1; Initial: LimitLow=0, LimitHigh=0.3; Retest: LimitLow=0, LimitHigh=0.3; Recall: LimitLow=0, LimitHigh=0.3; Recall retest: LimitLow=0, LimitHigh=0.3	Peak Area	0.15	0	0.3
HIE with sampling at different times (A)	HIE-3h	ESI1	1	C10:2	sample0021_135739	8000086430	Initial	MRM+	312.20/85.00	Qualifier	C10 IS	0	0.005	1907	96	0	0	320336	9177	Savitzky-Golay,7,2	0.13/0.80	0.499	NBS: ISConc=-1; Initial: LimitLow=0, LimitHigh=100; Retest: LimitLow=0, LimitHigh=100; Recall: LimitLow=0, LimitHigh=100; Recall retest: LimitLow=0, LimitHigh=100	Peak Area	50	0	100
HIE with sampling at different times (A)	HIE-3h	ESI1	1	C12	sample0021_135739	8000086430	Initial	MRM+	344.30/85.00	Qualifier	C12 IS	0	0.222	83353	2463	0	0	391094	11073	Savitzky-Golay,7,2	0.13/0.80	0.176	NBS: ISConc=1; Initial: LimitLow=0, LimitHigh=0.33; Retest: LimitLow=0, LimitHigh=0.33; Recall: LimitLow=0, LimitHigh=0.33; Recall retest: LimitLow=0, LimitHigh=0.33; LC: TargetConc=0.28, Stdev=0.09; HC: TargetConc=1.36, Stdev=0.16	Peak Area	0.165	0	0.33
HIE with sampling at different times (A)	HIE-3h	ESI1	1	C12 IS	sample0021_135739	8000086430	Initial	MRM+	347.30/85.00	IS		1	0	391094	11073	0	0	0	0	Savitzky-Golay,7,2	0.13/0.80	0.176	NBS: Internal Standard;	Peak Area	0	0	0
HIE with sampling at different times (A)	HIE-3h	ESI1	1	C12:1	sample0021_135739	8000086430	Initial	MRM+	342.30/85.00	Qualifier	C12 IS	0	0.014	5615	268	0	0	391094	11073	Savitzky-Golay,7,2	0.13/0.80	0.205	NBS: ISConc=-1; Initial: LimitLow=0, LimitHigh=1000; Retest: LimitLow=0, LimitHigh=1000; Recall: LimitLow=0, LimitHigh=1000; Recall retest: LimitLow=0, LimitHigh=10000	Peak Area	500	0	1000
HIE with sampling at different times (A)	HIE-3h	ESI1	1	C14	sample0021_135739	8000086430	Initial	MRM+	372.30/85.00	Qualifier	C14 IS	0	0.503	246357	7112	0	0	534033	15488	Savitzky-Golay,7,2	0.13/0.80	0.176	NBS: ISConc=1.02; Initial: LimitLow=0, LimitHigh=0.59; Retest: LimitLow=0, LimitHigh=0.59; Recall: LimitLow=0, LimitHigh=0.59; Recall retest: LimitLow=0, LimitHigh=0.59; LC: TargetConc=0.33, Stdev=0.09; HC: TargetConc=1.9, Stdev=0.23	Peak Area	0.295	0	0.59
HIE with sampling at different times (A)	HIE-3h	ESI1	1	C14 IS	sample0021_135739	8000086430	Initial	MRM+	375.30/85.00	IS		1.02	0	534033	15488	0	0	0	0	Savitzky-Golay,7,2	0.13/0.80	0.176	NBS: Internal Standard;	Peak Area	0	0	0
HIE with sampling at different times (A)	HIE-3h	ESI1	1	C14:1	sample0021_135739	8000086430	Initial	MRM+	370.30/85.00	Qualifier	C14 IS	0	0.053	27555	848	0	0	534033	15488	Savitzky-Golay,7,2	0.13/0.80	0.176	NBS: ISConc=-1; Initial: LimitLow=0, LimitHigh=0.32; Retest: LimitLow=0, LimitHigh=0.32; Recall: LimitLow=0, LimitHigh=0.32; Recall retest: LimitLow=0, LimitHigh=0.32	Peak Area	0.16	0	0.32
HIE with sampling at different times (A)	HIE-3h	ESI1	1	C14:2	sample0021_135739	8000086430	Initial	MRM+	368.30/85.00	Qualifier	C14 IS	0	0.01	5244	240	0	0	534033	15488	Savitzky-Golay,7,2	0.13/0.80	0.44	NBS: ISConc=-1;	Peak Area	0	0	0
HIE with sampling at different times (A)	HIE-3h	ESI1	1	C14OH	sample0021_135739	8000086430	Initial	MRM+	388.30/85.00	Qualifier	C14 IS	0	0	142	21	0	0	534033	15488	Savitzky-Golay,7,2	0.13/0.80	0.381	NBS: ISConc=-1; Initial: LimitLow=0, LimitHigh=0.2; Retest: LimitLow=0, LimitHigh=0.2; Recall: LimitLow=0, LimitHigh=0.2; Recall retest: LimitLow=0, LimitHigh=0.2	Peak Area	0.1	0	0.2
HIE with sampling at different times (A)	HIE-3h	ESI1	1	C16	sample0021_135739	8000086430	Initial	MRM+	400.30/85.00	Qualifier	C16 IS	0	2.036	1037192	28978	0	0	485078	13492	Savitzky-Golay,7,2	0.13/0.80	0.176	NBS: ISConc=0.89; Initial: LimitLow=0.3, LimitHigh=8.5; Retest: LimitLow=0.3, LimitHigh=8.5; Recall: LimitLow=0.3, LimitHigh=8.5; Recall retest: LimitLow=0.3, LimitHigh=8.5; LC: TargetConc=2.02, Stdev=0.24; HC: TargetConc=11.7, Stdev=1.4	Peak Area	4.4	0.3	8.5
HIE with sampling at different times (A)	HIE-3h	ESI1	1	C16 IS	sample0021_135739	8000086430	Initial	MRM+	403.40/85.00	IS		0.89	0	485078	13492	0	0	0	0	Savitzky-Golay,7,2	0.13/0.80	0.205	NBS: Internal Standard;	Peak Area	0	0	0
HIE with sampling at different times (A)	HIE-3h	ESI1	1	C16:1	sample0021_135739	8000086430	Initial	MRM+	398.30/85.00	Qualifier	C16 IS	0	0.094	51092	1516	0	0	485078	13492	Savitzky-Golay,7,2	0.13/0.80	0.381	NBS: ISConc=-1;	Peak Area	0	0	0
HIE with sampling at different times (A)	HIE-3h	ESI1	1	C16OH	sample0021_135739	8000086430	Initial	MRM+	416.30/85.00	Qualifier	C16 IS	0	0.021	11342	420	0	0	485078	13492	Savitzky-Golay,7,2	0.13/0.80	0.411	NBS: ISConc=-1; Initial: LimitLow=0, LimitHigh=0.19; Retest: LimitLow=0, LimitHigh=0.19; Recall: LimitLow=0, LimitHigh=0.19; Recall retest: LimitLow=0, LimitHigh=0.19	Peak Area	0.095	0	0.19
HIE with sampling at different times (A)	HIE-3h	ESI1	1	C16:1OH\C17	sample0021_135739	8000086430	Initial	MRM+	414.30/85.00	Qualifier	C16 IS	0	0.069	37469	1260	0	0	485078	13492	Savitzky-Golay,7,2	0.13/0.80	0.616	NBS: ISConc=-1; Initial: LimitLow=0, LimitHigh=0.22; Retest: LimitLow=0, LimitHigh=0.22; Recall: LimitLow=0, LimitHigh=0.22; Recall retest: LimitLow=0, LimitHigh=0.22	Peak Area	0.11	0	0.22
HIE with sampling at different times (A)	HIE-3h	ESI1	1	C18	sample0021_135739	8000086430	Initial	MRM+	428.40/85.00	Qualifier	C18 IS	0	0.638	335085	9718	0	0	584345	15893	Savitzky-Golay,7,2	0.13/0.80	0.205	NBS: ISConc=0.92; Initial: LimitLow=0.13, LimitHigh=2.5; Retest: LimitLow=0.13, LimitHigh=2.5; Recall: LimitLow=0.13, LimitHigh=2.5; Recall retest: LimitLow=0.13, LimitHigh=2.5; LC: TargetConc=1.14, Stdev=0.14; HC: TargetConc=4.32, Stdev=0.52	Peak Area	1.315	0.13	2.5
HIE with sampling at different times (A)	HIE-3h	ESI1	1	C18 IS	sample0021_135739	8000086430	Initial	MRM+	431.40/85.00	IS		0.92	0	584345	15893	0	0	0	0	Savitzky-Golay,7,2	0.13/0.80	0.176	NBS: Internal Standard;	Peak Area	0	0	0
HIE with sampling at different times (A)	HIE-3h	ESI1	1	C18:1	sample0021_135739	8000086430	Initial	MRM+	426.40/85.00	Qualifier	C18 IS	0	0.913	579882	15845	0	0	584345	15893	Savitzky-Golay,7,2	0.13/0.80	0.352	NBS: ISConc=-1; Initial: LimitLow=0.15, LimitHigh=3.35; Retest: LimitLow=0.15, LimitHigh=3.35; Recall: LimitLow=0.15, LimitHigh=3.35; Recall retest: LimitLow=0.15, LimitHigh=3.35	Peak Area	1.75	0.15	3.35
HIE with sampling at different times (A)	HIE-3h	ESI1	1	C18:2	sample0021_135739	8000086430	Initial	MRM+	424.30/85.00	Qualifier	C18 IS	0	0.01	6144	197	0	0	584345	15893	Savitzky-Golay,7,2	0.13/0.80	0.323	NBS: ISConc=-1;	Peak Area	0	0	0
HIE with sampling at different times (A)	HIE-3h	ESI1	1	C18OH	sample0021_135739	8000086430	Initial	MRM+	444.40/85.00	Qualifier	C18 IS	0	0.017	10963	373	0	0	584345	15893	Savitzky-Golay,7,2	0.13/0.80	0.763	NBS: ISConc=-1; Initial: LimitLow=0, LimitHigh=0.14; Retest: LimitLow=0, LimitHigh=0.14; Recall: LimitLow=0, LimitHigh=0.14; Recall retest: LimitLow=0, LimitHigh=0.14	Peak Area	0.07	0	0.14
HIE with sampling at different times (A)	HIE-3h	ESI1	1	C18:1OH	sample0021_135739	8000086430	Initial	MRM+	442.40/85.00	Qualifier	C18 IS	0	0.044	28239	880	0	0	584345	15893	Savitzky-Golay,7,2	0.13/0.80	0.323	NBS: ISConc=-1; Initial: LimitLow=0, LimitHigh=0.16; Retest: LimitLow=0, LimitHigh=0.16; Recall: LimitLow=0, LimitHigh=0.16; Recall retest: LimitLow=0, LimitHigh=0.16	Peak Area	0.08	0	0.16
HIE with sampling at different times (A)	HIE-3h	ESI1	1	C18:2OH	sample0021_135739	8000086430	Initial	MRM+	440.30/85.00	Qualifier	C18 IS	0	0.084	53442	1620	0	0	584345	15893	Savitzky-Golay,7,2	0.13/0.80	0.44	NBS: ISConc=-1;	Peak Area	0	0	0
HIE with sampling at different times (A)	HIE-3h	ESI1	1	C20	sample0021_135739	8000086430	Initial	MRM+	456.40/85.00	Qualifier	C26 IS	0	0.035	30721	905	0	0	956159	24827	Savitzky-Golay,7,2	0.13/0.80	0.411	NBS: ISConc=-1;	Peak Area	0	0	0
HIE with sampling at different times (A)	HIE-3h	ESI1	1	C22	sample0021_135739	8000086430	Initial	MRM+	484.40/85.00	Qualifier	C26 IS	0	0.007	6003	216	0	0	956159	24827	Savitzky-Golay,7,2	0.13/0.80	0.44	NBS: ISConc=-1;	Peak Area	0	0	0
HIE with sampling at different times (A)	HIE-3h	ESI1	1	C24	sample0021_135739	8000086430	Initial	MRM+	512.50/85.00	Qualifier	C26 IS	0	0.031	27593	943	0	0	956159	24827	Savitzky-Golay,7,2	0.13/0.80	0.411	NBS: ISConc=-1;	Peak Area	0	0	0
HIE with sampling at different times (A)	HIE-3h	ESI1	1	C26	sample0021_135739	8000086430	Initial	MRM+	540.50/85.00	Qualifier	C26 IS	0	0.004	3502	148	0	0	956159	24827	Savitzky-Golay,7,2	0.13/0.80	0.205	NBS: ISConc=1.09; LC: TargetConc=0.61, Stdev=0.09; HC: TargetConc=1.66, Stdev=0.2	Peak Area	0	0	0
HIE with sampling at different times (A)	HIE-3h	ESI1	1	C26 IS	sample0021_135739	8000086430	Initial	MRM+	543.50/85.00	IS		1.09	0	956159	24827	0	0	0	0	Savitzky-Golay,7,2	0.13/0.80	0.44	NBS: Internal Standard;	Peak Area	0	0	0
HIE with sampling at different times (A)	HIE-3h	ESI1	1	SA	sample0021_135739	8000086430	Initial	MRM+	155.10/109.10	Qualifier	SA IS	0	0.332	9282	319	0	0	1625911	45447	Savitzky-Golay,7,2	0.13/0.80	0.616	NBS: ISConc=58.1; Initial: LimitLow=0, LimitHigh=2; Retest: LimitLow=0, LimitHigh=2; Recall: LimitLow=0, LimitHigh=2; Recall retest: LimitLow=0, LimitHigh=2; LC: TargetConc=2.57, Stdev=0.38; HC: TargetConc=10.4, Stdev=1.2	Peak Area	1	0	2
HIE with sampling at different times (A)	HIE-3h	ESI1	1	SA IS	sample0021_135739	8000086430	Initial	MRM+	160.10/114.10	IS		58.1	0	1625911	45447	0	0	0	0	Savitzky-Golay,7,2	0.13/0.80	0.528	NBS: Internal Standard;	Peak Area	0	0	0
HIE with sampling at different times (A)	HIE-3h	ESI1	1	ADO	sample0021_135739	8000086430	Initial	MRM+	268.10/136.10	Qualifier	ADO IS	0	0.158	11692	496	0	0	490239	15308	Savitzky-Golay,7,2	0.13/0.80	0.616	NBS: ISConc=9.44; LC: TargetConc=2.51, Stdev=0.34; HC: TargetConc=6.91, Stdev=0.83	Peak Area	0	0	0
HIE with sampling at different times (A)	HIE-3h	ESI1	1	ADO IS	sample0021_135739	8000086430	Initial	MRM+	273.10/136.10	IS		9.44	0	490239	15308	0	0	0	0	Savitzky-Golay,7,2	0.13/0.80	0.176	NBS: Internal Standard;	Peak Area	0	0	0
HIE with sampling at different times (A)	HIE-3h	ESI1	1	D-ADO	sample0021_135739	8000086430	Initial	MRM+	252.10/136.10	Qualifier	D-ADO IS	0	0.02	1141	68	0	0	565547	17482	Savitzky-Golay,7,2	0.13/0.80	0.763	NBS: ISConc=9.82;	Peak Area	0	0	0
HIE with sampling at different times (A)	HIE-3h	ESI1	1	D-ADO IS	sample0021_135739	8000086430	Initial	MRM+	257.10/136.10	IS		9.82	0	565547	17482	0	0	0	0	Savitzky-Golay,7,2	0.13/0.80	0.205	NBS: Internal Standard;	Peak Area	0	0	0
HIE with sampling at different times (A)	HIE-3h	ESI1	1	C20:0-LPC	sample0021_135739	8000086430	Initial	MRM+	552.40/104.10	Qualifier	C26:0-LPC IS	0	2.485	146108	4141	0	0	258700	7174	Savitzky-Golay,7,2	0.13/0.80	0.323	NBS: ISConc=-1;	Peak Area	0	0	0
HIE with sampling at different times (A)	HIE-3h	ESI1	1	C22:0-LPC	sample0021_135739	8000086430	Initial	MRM+	580.40/104.10	Qualifier	C26:0-LPC IS	0	1.219	71660	2074	0	0	258700	7174	Savitzky-Golay,7,2	0.13/0.80	0.293	NBS: ISConc=-1;	Peak Area	0	0	0
HIE with sampling at different times (A)	HIE-3h	ESI1	1	C24:0-LPC	sample0021_135739	8000086430	Initial	MRM+	608.50/104.10	Qualifier	C26:0-LPC IS	0	1.984	116635	3182	0	0	258700	7174	Savitzky-Golay,7,2	0.13/0.80	0.704	NBS: ISConc=-1;	Peak Area	0	0	0
HIE with sampling at different times (A)	HIE-3h	ESI1	1	C26:0-LPC	sample0021_135739	8000086430	Initial	MRM+	636.50/104.10	Qualifier	C26:0-LPC IS	0	0.499	32610	1146	0	0	258700	7174	Savitzky-Golay,7,2	0.13/0.80	0.205	NBS: ISConc=4.4; LC: TargetConc=0.92, Stdev=0.11; HC: TargetConc=3.04, Stdev=0.36	Peak Area	0	0	0
HIE with sampling at different times (A)	HIE-3h	ESI1	1	C26:0-LPC IS	sample0021_135739	8000086430	Initial	MRM+	640.50/104.10	IS		4.4	0	258700	7174	0	0	0	0	Savitzky-Golay,7,2	0.13/0.80	0.587	NBS: Internal Standard;	Peak Area	0	0	0
HIE with sampling at different times (A)	HIE-3h	ESI1	1	ASA	sample0021_135739	8000086430	Initial	MRM+	291.10/70.10	Qualifier	Arg IS	0	1.213	25552	981	0	0	998158	27093	Savitzky-Golay,7,2	0.13/0.80	0.235	NBS: --	Peak Area	0	0	0
HIE with sampling at different times (A)	HIE-3h	ESI1	1	ASA anhydride I + II	sample0021_135739	8000086430	Initial	MRM+	273.10/70.10	Qualifier	Arg IS	0	0.361	7599	291	0	0	998158	27093	Savitzky-Golay,7,2	0.13/0.80	0.205	NBS: --	Peak Area	0	0	0
HIE with sampling at different times (A)	HIE-3h			ASATotal	sample0021_135739	8000086430	Initial	N/A	0.00/0.00	Qualifier	Arg IS	0	1.59	33151	1272	0	0	998158	27093	Savitzky-Golay,7,2	0.13/0.80	0	NBS: ISConc=-1; Initial: LimitLow=0, LimitHigh=1.5; Retest: LimitLow=0, LimitHigh=1.5; Recall: LimitLow=0, LimitHigh=1.5; Recall retest: LimitLow=0, LimitHigh=1.5; LC: TargetConc=2.22, Stdev=0.38; HC: TargetConc=39, Stdev=4.7	Peak Area	0.75	0	1.5
HIE with sampling at different times (A)	HIE-3h	ESI1	1	Ala	sample0022_135922	8000086431	Initial	MRM+	90.10/44.00	Qualifier	Ala IS	0	561.301	1005936	28542	0	0	245256	6832	Savitzky-Golay,7,2	0.13/0.80	0.205	NBS: ISConc=115; Initial: LimitLow=0, LimitHigh=10000; Retest: LimitLow=0, LimitHigh=10000; Recall: LimitLow=0, LimitHigh=10000; Recall retest: LimitLow=0, LimitHigh=10000; LC: TargetConc=479, Stdev=57; HC: TargetConc=967, Stdev=116	Peak Area	5000	0	10000
HIE with sampling at different times (A)	HIE-3h	ESI1	1	Ala IS	sample0022_135922	8000086431	Initial	MRM+	93.10/47.10	IS		115	0	245256	6832	0	0	0	0	Savitzky-Golay,7,2	0.13/0.80	0.499	NBS: Internal Standard;	Peak Area	0	0	0
HIE with sampling at different times (A)	HIE-3h	ESI1	1	Arg	sample0022_135922	8000086431	Initial	MRM+	175.10/70.10	Qualifier	Arg IS	0	109.776	2213489	60940	0	0	965312	26355	Savitzky-Golay,7,2	0.13/0.80	0.205	NBS: ISConc=47.4; Initial: LimitLow=0, LimitHigh=70; Retest: LimitLow=0, LimitHigh=70; Recall: LimitLow=0, LimitHigh=70; Recall retest: LimitLow=0, LimitHigh=70; LC: TargetConc=24.2, Stdev=2.9; HC: TargetConc=136, Stdev=16	Peak Area	35	0	70
HIE with sampling at different times (A)	HIE-3h	ESI1	1	Arg IS	sample0022_135922	8000086431	Initial	MRM+	180.10/75.10	IS		47.4	0	965312	26355	0	0	0	0	Savitzky-Golay,7,2	0.13/0.80	0.411	NBS: Internal Standard;	Peak Area	0	0	0
HIE with sampling at different times (A)	HIE-3h	ESI1	1	Cit	sample0022_135922	8000086431	Initial	MRM+	176.10/113.10	Qualifier	Cit IS	0	52.915	164259	4646	0	0	286934	8610	Savitzky-Golay,7,2	0.13/0.80	0.411	NBS: ISConc=81.8; Initial: LimitLow=0, LimitHigh=80; Retest: LimitLow=0, LimitHigh=80; Recall: LimitLow=0, LimitHigh=80; Recall retest: LimitLow=0, LimitHigh=80; LC: TargetConc=33.1, Stdev=4; HC: TargetConc=147, Stdev=18	Peak Area	40	0	80
HIE with sampling at different times (A)	HIE-3h	ESI1	1	Cit IS	sample0022_135922	8000086431	Initial	MRM+	178.10/115.10	IS		81.8	0	286934	8610	0	0	0	0	Savitzky-Golay,7,2	0.13/0.80	0.352	NBS: Internal Standard;	Peak Area	0	0	0
HIE with sampling at different times (A)	HIE-3h	ESI1	1	Gln\Lys	sample0022_135922	8000086431	Initial	MRM+	147.10/84.00	Qualifier	Gln\Lys IS	0	203.781	1139972	31505	0	0	499944	13631	Savitzky-Golay,7,2	0.13/0.80	0.176	NBS: ISConc=99.3; LC: TargetConc=635, Stdev=76; HC: TargetConc=1350, Stdev=160	Peak Area	0	0	0
HIE with sampling at different times (A)	HIE-3h	ESI1	1	Gln\Lys IS	sample0022_135922	8000086431	Initial	MRM+	152.10/88.10	IS		99.3	0	499944	13631	0	0	0	0	Savitzky-Golay,7,2	0.13/0.80	0.264	NBS: Internal Standard;	Peak Area	0	0	0
HIE with sampling at different times (A)	HIE-3h	ESI1	1	Glu	sample0022_135922	8000086431	Initial	MRM+	148.10/84.00	Qualifier	Gln\Lys IS	0	210.621	1060411	29529	0	0	499944	13631	Savitzky-Golay,7,2	0.13/0.80	0.205	NBS: ISConc=-1;	Peak Area	0	0	0
HIE with sampling at different times (A)	HIE-3h	ESI1	1	Gly	sample0022_135922	8000086431	Initial	MRM+	76.00/30.00	Qualifier	Gly IS	0	382.201	280626	7650	0	0	438516	13090	Savitzky-Golay,7,2	0.13/0.80	0.176	NBS: ISConc=553; LC: TargetConc=549, Stdev=66; HC: TargetConc=1320, Stdev=160	Peak Area	0	0	0
HIE with sampling at different times (A)	HIE-3h	ESI1	1	Gly IS	sample0022_135922	8000086431	Initial	MRM+	78.00/32.00	IS		553	0	438516	13090	0	0	0	0	Savitzky-Golay,7,2	0.13/0.80	0.205	NBS: Internal Standard;	Peak Area	0	0	0
HIE with sampling at different times (A)	HIE-3h	ESI1	1	Leu\Ile\Pro-OH	sample0022_135922	8000086431	Initial	MRM+	132.10/86.10	Qualifier	Leu\Ile\Pro-OH IS	0	251.337	7040376	195875	0	0	2857473	83126	Savitzky-Golay,7,2	0.13/0.80	0.176	NBS: ISConc=101; Initial: LimitLow=0, LimitHigh=380; Retest: LimitLow=0, LimitHigh=380; Recall: LimitLow=0, LimitHigh=380; Recall retest: LimitLow=0, LimitHigh=380; LC: TargetConc=183, Stdev=22; HC: TargetConc=772, Stdev=93	Peak Area	190	0	380
HIE with sampling at different times (A)	HIE-3h	ESI1	1	Leu\Ile\Pro-OH IS	sample0022_135922	8000086431	Initial	MRM+	135.10/89.10	IS		101	0	2857473	83126	0	0	0	0	Savitzky-Golay,7,2	0.13/0.80	0.176	NBS: Internal Standard;	Peak Area	0	0	0
HIE with sampling at different times (A)	HIE-3h	ESI1	1	Met	sample0022_135922	8000086431	Initial	MRM+	150.10/104.10	Qualifier	Met IS	0	15.006	60977	1962	0	0	469965	13491	Savitzky-Golay,7,2	0.13/0.80	0.235	NBS: ISConc=99.7; Initial: LimitLow=7, LimitHigh=80; Retest: LimitLow=7, LimitHigh=80; Recall: LimitLow=7, LimitHigh=80; Recall retest: LimitLow=7, LimitHigh=80; LC: TargetConc=36, Stdev=4.3; HC: TargetConc=177, Stdev=21	Peak Area	43.5	7	80
HIE with sampling at different times (A)	HIE-3h	ESI1	1	Met IS	sample0022_135922	8000086431	Initial	MRM+	153.10/107.10	IS		99.7	0	469965	13491	0	0	0	0	Savitzky-Golay,7,2	0.13/0.80	0.323	NBS: Internal Standard;	Peak Area	0	0	0
HIE with sampling at different times (A)	HIE-3h	ESI1	1	Orn	sample0022_135922	8000086431	Initial	MRM+	133.10/70.10	Qualifier	Orn IS	0	26.621	179571	5386	0	0	735262	21467	Savitzky-Golay,7,2	0.13/0.80	0.499	NBS: ISConc=109; LC: TargetConc=154, Stdev=18; HC: TargetConc=488, Stdev=59	Peak Area	0	0	0
HIE with sampling at different times (A)	HIE-3h	ESI1	1	Orn IS	sample0022_135922	8000086431	Initial	MRM+	139.10/76.10	IS		109	0	735262	21467	0	0	0	0	Savitzky-Golay,7,2	0.13/0.80	0.176	NBS: Internal Standard;	Peak Area	0	0	0
HIE with sampling at different times (A)	HIE-3h	ESI1	1	Phe	sample0022_135922	8000086431	Initial	MRM+	166.10/120.10	Qualifier	Phe IS	0	46.337	1660849	45608	0	0	2779418	76785	Savitzky-Golay,7,2	0.13/0.80	0.205	NBS: ISConc=71.8; Initial: LimitLow=0, LimitHigh=120; Retest: LimitLow=0, LimitHigh=120; Recall: LimitLow=0, LimitHigh=120; Recall retest: LimitLow=0, LimitHigh=120; LC: TargetConc=79.4, Stdev=9.5; HC: TargetConc=264, Stdev=32	Peak Area	60	0	120
HIE with sampling at different times (A)	HIE-3h	ESI1	1	Phe IS	sample0022_135922	8000086431	Initial	MRM+	172.10/126.10	IS		71.8	0	2779418	76785	0	0	0	0	Savitzky-Golay,7,2	0.13/0.80	0.176	NBS: Internal Standard;	Peak Area	0	0	0
HIE with sampling at different times (A)	HIE-3h	ESI1	1	Pro	sample0022_135922	8000086431	Initial	MRM+	116.10/70.10	Qualifier	Pro IS	0	184.743	4023618	106515	0	0	1705778	45735	Savitzky-Golay,7,2	0.13/0.80	0.352	NBS: ISConc=88; LC: TargetConc=235, Stdev=28; HC: TargetConc=683, Stdev=82	Peak Area	0	0	0
HIE with sampling at different times (A)	HIE-3h	ESI1	1	Pro IS	sample0022_135922	8000086431	Initial	MRM+	121.10/74.10	IS		88	0	1705778	45735	0	0	0	0	Savitzky-Golay,7,2	0.13/0.80	0.528	NBS: Internal Standard;	Peak Area	0	0	0
HIE with sampling at different times (A)	HIE-3h	ESI1	1	Tyr	sample0022_135922	8000086431	Initial	MRM+	182.10/136.10	Qualifier	Tyr IS	0	174.678	1191706	32673	0	0	963652	26630	Savitzky-Golay,7,2	0.13/0.80	0.205	NBS: ISConc=113; LC: TargetConc=136, Stdev=16; HC: TargetConc=549, Stdev=66	Peak Area	0	0	0
HIE with sampling at different times (A)	HIE-3h	ESI1	1	Tyr IS	sample0022_135922	8000086431	Initial	MRM+	188.10/142.10	IS		113	0	963652	26630	0	0	0	0	Savitzky-Golay,7,2	0.13/0.80	0.499	NBS: Internal Standard;	Peak Area	0	0	0
HIE with sampling at different times (A)	HIE-3h	ESI1	1	Val	sample0022_135922	8000086431	Initial	MRM+	118.10/72.10	Qualifier	Val IS	0	173.182	2701077	81308	0	0	1886586	54705	Savitzky-Golay,7,2	0.13/0.80	0.205	NBS: ISConc=108; LC: TargetConc=213, Stdev=26; HC: TargetConc=470, Stdev=56	Peak Area	0	0	0
HIE with sampling at different times (A)	HIE-3h	ESI1	1	Val IS	sample0022_135922	8000086431	Initial	MRM+	124.10/77.10	IS		108	0	1886586	54705	0	0	0	0	Savitzky-Golay,7,2	0.13/0.80	0.176	NBS: Internal Standard;	Peak Area	0	0	0
HIE with sampling at different times (A)	HIE-3h	ESI1	1	C0	sample0022_135922	8000086431	Initial	MRM+	162.10/103.00	Qualifier	C0 IS	0	21.536	587448	15871	0	0	401522	10836	Savitzky-Golay,7,2	0.13/0.80	0.616	NBS: ISConc=11.5; Initial: LimitLow=8, LimitHigh=90; Retest: LimitLow=8, LimitHigh=90; Recall: LimitLow=8, LimitHigh=90; Recall retest: LimitLow=8, LimitHigh=90; LC: TargetConc=41, Stdev=4.9; HC: TargetConc=151, Stdev=18	Peak Area	49	8	90
HIE with sampling at different times (A)	HIE-3h	ESI1	1	C0 IS	sample0022_135922	8000086431	Initial	MRM+	171.20/103.00	IS		11.5	0	401522	10836	0	0	0	0	Savitzky-Golay,7,2	0.13/0.80	0.557	NBS: Internal Standard;	Peak Area	0	0	0
HIE with sampling at different times (A)	HIE-3h	ESI1	1	C2	sample0022_135922	8000086431	Initial	MRM+	204.10/85.00	Qualifier	C2 IS	0	5.991	977286	27636	0	0	857786	22512	Savitzky-Golay,7,2	0.13/0.80	0.469	NBS: ISConc=4.78; Initial: LimitLow=0, LimitHigh=115; Retest: LimitLow=0, LimitHigh=115; Recall: LimitLow=0, LimitHigh=115; Recall retest: LimitLow=0, LimitHigh=115; LC: TargetConc=27.6, Stdev=3.3; HC: TargetConc=82.4, Stdev=9.9	Peak Area	57.5	0	115
HIE with sampling at different times (A)	HIE-3h	ESI1	1	C2 IS	sample0022_135922	8000086431	Initial	MRM+	207.10/85.00	IS		4.78	0	857786	22512	0	0	0	0	Savitzky-Golay,7,2	0.13/0.80	0.411	NBS: Internal Standard;	Peak Area	0	0	0
HIE with sampling at different times (A)	HIE-3h	ESI1	1	C3	sample0022_135922	8000086431	Initial	MRM+	218.10/85.00	Qualifier	C3 IS	0	0.158	30349	1004	0	0	389124	10240	Savitzky-Golay,7,2	0.13/0.80	0.557	NBS: ISConc=2.03; Initial: LimitLow=0, LimitHigh=6.8; Retest: LimitLow=0, LimitHigh=6.8; Recall: LimitLow=0, LimitHigh=6.8; Recall retest: LimitLow=0, LimitHigh=6.8; LC: TargetConc=4.63, Stdev=0.56; HC: TargetConc=13.3, Stdev=1.6	Peak Area	3.4	0	6.8
HIE with sampling at different times (A)	HIE-3h	ESI1	1	C3 IS	sample0022_135922	8000086431	Initial	MRM+	221.20/85.00	IS		2.03	0	389124	10240	0	0	0	0	Savitzky-Golay,7,2	0.13/0.80	0.763	NBS: Internal Standard;	Peak Area	0	0	0
HIE with sampling at different times (A)	HIE-3h	ESI1	1	C3DC\C4OH	sample0022_135922	8000086431	Initial	MRM+	248.10/85.00	Qualifier	C4 IS	0	0.135	32343	1042	0	0	346793	9708	Savitzky-Golay,7,2	0.13/0.80	0.763	NBS: ISConc=-1; Initial: LimitLow=0, LimitHigh=10; Retest: LimitLow=0.04, LimitHigh=10; Recall: LimitLow=0.04, LimitHigh=10; Recall retest: LimitLow=0.04, LimitHigh=10	Peak Area	5	0	10
HIE with sampling at different times (A)	HIE-3h	ESI1	1	C4	sample0022_135922	8000086431	Initial	MRM+	232.20/85.00	Qualifier	C4 IS	0	0.075	17927	590	0	0	346793	9708	Savitzky-Golay,7,2	0.13/0.80	0.763	NBS: ISConc=1.45; Initial: LimitLow=0, LimitHigh=1.5; Retest: LimitLow=0, LimitHigh=1.5; Recall: LimitLow=0, LimitHigh=1.5; Recall retest: LimitLow=0, LimitHigh=1.5; LC: TargetConc=0.74, Stdev=0.1; HC: TargetConc=2.74, Stdev=0.33	Peak Area	0.75	0	1.5
HIE with sampling at different times (A)	HIE-3h	ESI1	1	C4 IS	sample0022_135922	8000086431	Initial	MRM+	235.20/85.00	IS		1.45	0	346793	9708	0	0	0	0	Savitzky-Golay,7,2	0.13/0.80	0.176	NBS: Internal Standard;	Peak Area	0	0	0
HIE with sampling at different times (A)	HIE-3h	ESI1	1	C4DC\C5OH	sample0022_135922	8000086431	Initial	MRM+	262.20/85.00	Qualifier	C5 IS	0	0.037	9386	295	0	0	387425	11523	Savitzky-Golay,7,2	0.13/0.80	0.235	NBS: ISConc=-1; Initial: LimitLow=0, LimitHigh=0.5; Retest: LimitLow=0, LimitHigh=0.5; Recall: LimitLow=0, LimitHigh=0.5; Recall retest: LimitLow=0, LimitHigh=0.5	Peak Area	0.25	0	0.5
HIE with sampling at different times (A)	HIE-3h	ESI1	1	C5	sample0022_135922	8000086431	Initial	MRM+	246.20/85.00	Qualifier	C5 IS	0	0.045	12019	493	0	0	387425	11523	Savitzky-Golay,7,2	0.13/0.80	0.293	NBS: ISConc=1.52; Initial: LimitLow=0, LimitHigh=0.56; Retest: LimitLow=0, LimitHigh=0.56; Recall: LimitLow=0, LimitHigh=0.56; Recall retest: LimitLow=0, LimitHigh=0.56; LC: TargetConc=0.63, Stdev=0.08; HC: TargetConc=2.46, Stdev=0.3	Peak Area	0.28	0	0.56
HIE with sampling at different times (A)	HIE-3h	ESI1	1	C5 IS	sample0022_135922	8000086431	Initial	MRM+	255.20/85.00	IS		1.52	0	387425	11523	0	0	0	0	Savitzky-Golay,7,2	0.13/0.80	0.147	NBS: Internal Standard;	Peak Area	0	0	0
HIE with sampling at different times (A)	HIE-3h	ESI1	1	C5:1	sample0022_135922	8000086431	Initial	MRM+	244.20/85.00	Qualifier	C5 IS	0	0.014	3599	182	0	0	387425	11523	Savitzky-Golay,7,2	0.13/0.80	0.499	NBS: ISConc=-1; Initial: LimitLow=0, LimitHigh=0.15; Retest: LimitLow=0, LimitHigh=0.15; Recall: LimitLow=0, LimitHigh=0.15; Recall retest: LimitLow=0, LimitHigh=0.15	Peak Area	0.075	0	0.15
HIE with sampling at different times (A)	HIE-3h	ESI1	1	C5DC\C6OH	sample0022_135922	8000086431	Initial	MRM+	276.20/85.00	Qualifier	C5DC\C6OH IS	0	0.047	4055	158	0	0	128376	4071	Savitzky-Golay,7,2	0.13/0.80	0.675	NBS: ISConc=1.49; Initial: LimitLow=0, LimitHigh=0.3; Retest: LimitLow=0, LimitHigh=0.3; Recall: LimitLow=0, LimitHigh=0.3; Recall retest: LimitLow=0, LimitHigh=0.3; LC: TargetConc=0.39, Stdev=0.09; HC: TargetConc=1.98, Stdev=0.24	Peak Area	0.15	0	0.3
HIE with sampling at different times (A)	HIE-3h	ESI1	1	C5DC\C6OH IS	sample0022_135922	8000086431	Initial	MRM+	282.20/85.00	IS		1.49	0	128376	4071	0	0	0	0	Savitzky-Golay,7,2	0.13/0.80	0.763	NBS: Internal Standard;	Peak Area	0	0	0
HIE with sampling at different times (A)	HIE-3h	ESI1	1	C6	sample0022_135922	8000086431	Initial	MRM+	260.20/85.00	Qualifier	C6 IS	0	0.005	1405	137	0	0	315423	9290	Savitzky-Golay,7,2	0.13/0.80	0.205	NBS: ISConc=1.03; Initial: LimitLow=0, LimitHigh=0.2; Retest: LimitLow=0, LimitHigh=0.2; Recall: LimitLow=0, LimitHigh=0.2; Recall retest: LimitLow=0, LimitHigh=0.2; LC: TargetConc=0.29, Stdev=0.09; HC: TargetConc=1.4, Stdev=0.17	Peak Area	0.1	0	0.2
HIE with sampling at different times (A)	HIE-3h	ESI1	1	C6 IS	sample0022_135922	8000086431	Initial	MRM+	263.20/85.00	IS		1.03	0	315423	9290	0	0	0	0	Savitzky-Golay,7,2	0.13/0.80	0.176	NBS: Internal Standard;	Peak Area	0	0	0
HIE with sampling at different times (A)	HIE-3h	ESI1	1	C6DC	sample0022_135922	8000086431	Initial	MRM+	290.20/85.00	Qualifier	C5DC\C6OH IS	0	0.028	2382	113	0	0	128376	4071	Savitzky-Golay,7,2	0.13/0.80	0.235	NBS: ISConc=-1;	Peak Area	0	0	0
HIE with sampling at different times (A)	HIE-3h	ESI1	1	C8	sample0022_135922	8000086431	Initial	MRM+	288.20/85.00	Qualifier	C8 IS	0	0.055	14822	571	0	0	280616	8671	Savitzky-Golay,7,2	0.13/0.80	0.147	NBS: ISConc=1.04; Initial: LimitLow=0, LimitHigh=0.4; Retest: LimitLow=0, LimitHigh=0.4; Recall: LimitLow=0, LimitHigh=0.4; Recall retest: LimitLow=0, LimitHigh=0.4; LC: TargetConc=0.55, Stdev=0.08; HC: TargetConc=2.76, Stdev=0.33	Peak Area	0.2	0	0.4
HIE with sampling at different times (A)	HIE-3h	ESI1	1	C8 IS	sample0022_135922	8000086431	Initial	MRM+	291.20/85.00	IS		1.04	0	280616	8671	0	0	0	0	Savitzky-Golay,7,2	0.13/0.80	0.147	NBS: Internal Standard;	Peak Area	0	0	0
HIE with sampling at different times (A)	HIE-3h	ESI1	1	C8:1	sample0022_135922	8000086431	Initial	MRM+	286.20/85.00	Qualifier	C8 IS	0	0.025	6811	330	0	0	280616	8671	Savitzky-Golay,7,2	0.13/0.80	0.352	NBS: ISConc=-1;	Peak Area	0	0	0
HIE with sampling at different times (A)	HIE-3h	ESI1	1	C10	sample0022_135922	8000086431	Initial	MRM+	316.20/85.00	Qualifier	C10 IS	0	0.123	35565	1166	0	0	315040	10474	Savitzky-Golay,7,2	0.13/0.80	0.264	NBS: ISConc=0.91; Initial: LimitLow=0, LimitHigh=0.29; Retest: LimitLow=0, LimitHigh=0.29; Recall: LimitLow=0, LimitHigh=0.29; Recall retest: LimitLow=0, LimitHigh=0.29; LC: TargetConc=0.31, Stdev=0.09; HC: TargetConc=2.02, Stdev=0.24	Peak Area	0.145	0	0.29
HIE with sampling at different times (A)	HIE-3h	ESI1	1	C10 IS	sample0022_135922	8000086431	Initial	MRM+	319.30/85.00	IS		0.91	0	315040	10474	0	0	0	0	Savitzky-Golay,7,2	0.13/0.80	0.176	NBS: Internal Standard;	Peak Area	0	0	0
HIE with sampling at different times (A)	HIE-3h	ESI1	1	C10:1	sample0022_135922	8000086431	Initial	MRM+	314.20/85.00	Qualifier	C10 IS	0	0.033	11352	514	0	0	315040	10474	Savitzky-Golay,7,2	0.13/0.80	0.147	NBS: ISConc=-1; Initial: LimitLow=0, LimitHigh=0.3; Retest: LimitLow=0, LimitHigh=0.3; Recall: LimitLow=0, LimitHigh=0.3; Recall retest: LimitLow=0, LimitHigh=0.3	Peak Area	0.15	0	0.3
HIE with sampling at different times (A)	HIE-3h	ESI1	1	C10:2	sample0022_135922	8000086431	Initial	MRM+	312.20/85.00	Qualifier	C10 IS	0	0.004	1415	83	0	0	315040	10474	Savitzky-Golay,7,2	0.13/0.80	0.616	NBS: ISConc=-1; Initial: LimitLow=0, LimitHigh=100; Retest: LimitLow=0, LimitHigh=100; Recall: LimitLow=0, LimitHigh=100; Recall retest: LimitLow=0, LimitHigh=100	Peak Area	50	0	100
HIE with sampling at different times (A)	HIE-3h	ESI1	1	C12	sample0022_135922	8000086431	Initial	MRM+	344.30/85.00	Qualifier	C12 IS	0	0.281	114111	3444	0	0	421748	13396	Savitzky-Golay,7,2	0.13/0.80	0.264	NBS: ISConc=1; Initial: LimitLow=0, LimitHigh=0.33; Retest: LimitLow=0, LimitHigh=0.33; Recall: LimitLow=0, LimitHigh=0.33; Recall retest: LimitLow=0, LimitHigh=0.33; LC: TargetConc=0.28, Stdev=0.09; HC: TargetConc=1.36, Stdev=0.16	Peak Area	0.165	0	0.33
HIE with sampling at different times (A)	HIE-3h	ESI1	1	C12 IS	sample0022_135922	8000086431	Initial	MRM+	347.30/85.00	IS		1	0	421748	13396	0	0	0	0	Savitzky-Golay,7,2	0.13/0.80	0.147	NBS: Internal Standard;	Peak Area	0	0	0
HIE with sampling at different times (A)	HIE-3h	ESI1	1	C12:1	sample0022_135922	8000086431	Initial	MRM+	342.30/85.00	Qualifier	C12 IS	0	0.019	7935	227	0	0	421748	13396	Savitzky-Golay,7,2	0.13/0.80	0.469	NBS: ISConc=-1; Initial: LimitLow=0, LimitHigh=1000; Retest: LimitLow=0, LimitHigh=1000; Recall: LimitLow=0, LimitHigh=1000; Recall retest: LimitLow=0, LimitHigh=10000	Peak Area	500	0	1000
HIE with sampling at different times (A)	HIE-3h	ESI1	1	C14	sample0022_135922	8000086431	Initial	MRM+	372.30/85.00	Qualifier	C14 IS	0	0.515	265075	9171	0	0	561834	16955	Savitzky-Golay,7,2	0.13/0.80	0.147	NBS: ISConc=1.02; Initial: LimitLow=0, LimitHigh=0.59; Retest: LimitLow=0, LimitHigh=0.59; Recall: LimitLow=0, LimitHigh=0.59; Recall retest: LimitLow=0, LimitHigh=0.59; LC: TargetConc=0.33, Stdev=0.09; HC: TargetConc=1.9, Stdev=0.23	Peak Area	0.295	0	0.59
HIE with sampling at different times (A)	HIE-3h	ESI1	1	C14 IS	sample0022_135922	8000086431	Initial	MRM+	375.30/85.00	IS		1.02	0	561834	16955	0	0	0	0	Savitzky-Golay,7,2	0.13/0.80	0.147	NBS: Internal Standard;	Peak Area	0	0	0
HIE with sampling at different times (A)	HIE-3h	ESI1	1	C14:1	sample0022_135922	8000086431	Initial	MRM+	370.30/85.00	Qualifier	C14 IS	0	0.044	23976	731	0	0	561834	16955	Savitzky-Golay,7,2	0.13/0.80	0.469	NBS: ISConc=-1; Initial: LimitLow=0, LimitHigh=0.32; Retest: LimitLow=0, LimitHigh=0.32; Recall: LimitLow=0, LimitHigh=0.32; Recall retest: LimitLow=0, LimitHigh=0.32	Peak Area	0.16	0	0.32
HIE with sampling at different times (A)	HIE-3h	ESI1	1	C14:2	sample0022_135922	8000086431	Initial	MRM+	368.30/85.00	Qualifier	C14 IS	0	0.008	4283	195	0	0	561834	16955	Savitzky-Golay,7,2	0.13/0.80	0.44	NBS: ISConc=-1;	Peak Area	0	0	0
HIE with sampling at different times (A)	HIE-3h	ESI1	1	C14OH	sample0022_135922	8000086431	Initial	MRM+	388.30/85.00	Qualifier	C14 IS	0	0	0	0	0	0	561834	16955	Savitzky-Golay,7,2	0.13/0.80	0.763	NBS: ISConc=-1; Initial: LimitLow=0, LimitHigh=0.2; Retest: LimitLow=0, LimitHigh=0.2; Recall: LimitLow=0, LimitHigh=0.2; Recall retest: LimitLow=0, LimitHigh=0.2	Peak Area	0.1	0	0.2
HIE with sampling at different times (A)	HIE-3h	ESI1	1	C16	sample0022_135922	8000086431	Initial	MRM+	400.30/85.00	Qualifier	C16 IS	0	1.724	986351	29557	0	0	544772	15863	Savitzky-Golay,7,2	0.13/0.80	0.147	NBS: ISConc=0.89; Initial: LimitLow=0.3, LimitHigh=8.5; Retest: LimitLow=0.3, LimitHigh=8.5; Recall: LimitLow=0.3, LimitHigh=8.5; Recall retest: LimitLow=0.3, LimitHigh=8.5; LC: TargetConc=2.02, Stdev=0.24; HC: TargetConc=11.7, Stdev=1.4	Peak Area	4.4	0.3	8.5
HIE with sampling at different times (A)	HIE-3h	ESI1	1	C16 IS	sample0022_135922	8000086431	Initial	MRM+	403.40/85.00	IS		0.89	0	544772	15863	0	0	0	0	Savitzky-Golay,7,2	0.13/0.80	0.176	NBS: Internal Standard;	Peak Area	0	0	0
HIE with sampling at different times (A)	HIE-3h	ESI1	1	C16:1	sample0022_135922	8000086431	Initial	MRM+	398.30/85.00	Qualifier	C16 IS	0	0.059	36261	1140	0	0	544772	15863	Savitzky-Golay,7,2	0.13/0.80	0.176	NBS: ISConc=-1;	Peak Area	0	0	0
HIE with sampling at different times (A)	HIE-3h	ESI1	1	C16OH	sample0022_135922	8000086431	Initial	MRM+	416.30/85.00	Qualifier	C16 IS	0	0.017	10235	379	0	0	544772	15863	Savitzky-Golay,7,2	0.13/0.80	0.176	NBS: ISConc=-1; Initial: LimitLow=0, LimitHigh=0.19; Retest: LimitLow=0, LimitHigh=0.19; Recall: LimitLow=0, LimitHigh=0.19; Recall retest: LimitLow=0, LimitHigh=0.19	Peak Area	0.095	0	0.19
HIE with sampling at different times (A)	HIE-3h	ESI1	1	C16:1OH\C17	sample0022_135922	8000086431	Initial	MRM+	414.30/85.00	Qualifier	C16 IS	0	0.06	36718	1281	0	0	544772	15863	Savitzky-Golay,7,2	0.13/0.80	0.176	NBS: ISConc=-1; Initial: LimitLow=0, LimitHigh=0.22; Retest: LimitLow=0, LimitHigh=0.22; Recall: LimitLow=0, LimitHigh=0.22; Recall retest: LimitLow=0, LimitHigh=0.22	Peak Area	0.11	0	0.22
HIE with sampling at different times (A)	HIE-3h	ESI1	1	C18	sample0022_135922	8000086431	Initial	MRM+	428.40/85.00	Qualifier	C18 IS	0	0.448	261028	7507	0	0	647919	20146	Savitzky-Golay,7,2	0.13/0.80	0.147	NBS: ISConc=0.92; Initial: LimitLow=0.13, LimitHigh=2.5; Retest: LimitLow=0.13, LimitHigh=2.5; Recall: LimitLow=0.13, LimitHigh=2.5; Recall retest: LimitLow=0.13, LimitHigh=2.5; LC: TargetConc=1.14, Stdev=0.14; HC: TargetConc=4.32, Stdev=0.52	Peak Area	1.315	0.13	2.5
HIE with sampling at different times (A)	HIE-3h	ESI1	1	C18 IS	sample0022_135922	8000086431	Initial	MRM+	431.40/85.00	IS		0.92	0	647919	20146	0	0	0	0	Savitzky-Golay,7,2	0.13/0.80	0.147	NBS: Internal Standard;	Peak Area	0	0	0
HIE with sampling at different times (A)	HIE-3h	ESI1	1	C18:1	sample0022_135922	8000086431	Initial	MRM+	426.40/85.00	Qualifier	C18 IS	0	0.729	513351	14777	0	0	647919	20146	Savitzky-Golay,7,2	0.13/0.80	0.147	NBS: ISConc=-1; Initial: LimitLow=0.15, LimitHigh=3.35; Retest: LimitLow=0.15, LimitHigh=3.35; Recall: LimitLow=0.15, LimitHigh=3.35; Recall retest: LimitLow=0.15, LimitHigh=3.35	Peak Area	1.75	0.15	3.35
HIE with sampling at different times (A)	HIE-3h	ESI1	1	C18:2	sample0022_135922	8000086431	Initial	MRM+	424.30/85.00	Qualifier	C18 IS	0	0.006	4423	265	0	0	647919	20146	Savitzky-Golay,7,2	0.13/0.80	0.205	NBS: ISConc=-1;	Peak Area	0	0	0
HIE with sampling at different times (A)	HIE-3h	ESI1	1	C18OH	sample0022_135922	8000086431	Initial	MRM+	444.40/85.00	Qualifier	C18 IS	0	0.014	9879	356	0	0	647919	20146	Savitzky-Golay,7,2	0.13/0.80	0.264	NBS: ISConc=-1; Initial: LimitLow=0, LimitHigh=0.14; Retest: LimitLow=0, LimitHigh=0.14; Recall: LimitLow=0, LimitHigh=0.14; Recall retest: LimitLow=0, LimitHigh=0.14	Peak Area	0.07	0	0.14
HIE with sampling at different times (A)	HIE-3h	ESI1	1	C18:1OH	sample0022_135922	8000086431	Initial	MRM+	442.40/85.00	Qualifier	C18 IS	0	0.037	25816	841	0	0	647919	20146	Savitzky-Golay,7,2	0.13/0.80	0.411	NBS: ISConc=-1; Initial: LimitLow=0, LimitHigh=0.16; Retest: LimitLow=0, LimitHigh=0.16; Recall: LimitLow=0, LimitHigh=0.16; Recall retest: LimitLow=0, LimitHigh=0.16	Peak Area	0.08	0	0.16
HIE with sampling at different times (A)	HIE-3h	ESI1	1	C18:2OH	sample0022_135922	8000086431	Initial	MRM+	440.30/85.00	Qualifier	C18 IS	0	0.036	25571	783	0	0	647919	20146	Savitzky-Golay,7,2	0.13/0.80	0.704	NBS: ISConc=-1;	Peak Area	0	0	0
HIE with sampling at different times (A)	HIE-3h	ESI1	1	C20	sample0022_135922	8000086431	Initial	MRM+	456.40/85.00	Qualifier	C26 IS	0	0.024	21734	758	0	0	1001879	27142	Savitzky-Golay,7,2	0.13/0.80	0.528	NBS: ISConc=-1;	Peak Area	0	0	0
HIE with sampling at different times (A)	HIE-3h	ESI1	1	C22	sample0022_135922	8000086431	Initial	MRM+	484.40/85.00	Qualifier	C26 IS	0	0.013	11737	481	0	0	1001879	27142	Savitzky-Golay,7,2	0.13/0.80	0.733	NBS: ISConc=-1;	Peak Area	0	0	0
HIE with sampling at different times (A)	HIE-3h	ESI1	1	C24	sample0022_135922	8000086431	Initial	MRM+	512.50/85.00	Qualifier	C26 IS	0	0.039	35933	1167	0	0	1001879	27142	Savitzky-Golay,7,2	0.13/0.80	0.499	NBS: ISConc=-1;	Peak Area	0	0	0
HIE with sampling at different times (A)	HIE-3h	ESI1	1	C26	sample0022_135922	8000086431	Initial	MRM+	540.50/85.00	Qualifier	C26 IS	0	0.005	3890	161	0	0	1001879	27142	Savitzky-Golay,7,2	0.13/0.80	0.499	NBS: ISConc=1.09; LC: TargetConc=0.61, Stdev=0.09; HC: TargetConc=1.66, Stdev=0.2	Peak Area	0	0	0
HIE with sampling at different times (A)	HIE-3h	ESI1	1	C26 IS	sample0022_135922	8000086431	Initial	MRM+	543.50/85.00	IS		1.09	0	1001879	27142	0	0	0	0	Savitzky-Golay,7,2	0.13/0.80	0.469	NBS: Internal Standard;	Peak Area	0	0	0
HIE with sampling at different times (A)	HIE-3h	ESI1	1	SA	sample0022_135922	8000086431	Initial	MRM+	155.10/109.10	Qualifier	SA IS	0	0.43	10756	508	0	0	1452166	39676	Savitzky-Golay,7,2	0.13/0.80	0.147	NBS: ISConc=58.1; Initial: LimitLow=0, LimitHigh=2; Retest: LimitLow=0, LimitHigh=2; Recall: LimitLow=0, LimitHigh=2; Recall retest: LimitLow=0, LimitHigh=2; LC: TargetConc=2.57, Stdev=0.38; HC: TargetConc=10.4, Stdev=1.2	Peak Area	1	0	2
HIE with sampling at different times (A)	HIE-3h	ESI1	1	SA IS	sample0022_135922	8000086431	Initial	MRM+	160.10/114.10	IS		58.1	0	1452166	39676	0	0	0	0	Savitzky-Golay,7,2	0.13/0.80	0.381	NBS: Internal Standard;	Peak Area	0	0	0
HIE with sampling at different times (A)	HIE-3h	ESI1	1	ADO	sample0022_135922	8000086431	Initial	MRM+	268.10/136.10	Qualifier	ADO IS	0	0.062	4043	225	0	0	434363	14727	Savitzky-Golay,7,2	0.13/0.80	0.381	NBS: ISConc=9.44; LC: TargetConc=2.51, Stdev=0.34; HC: TargetConc=6.91, Stdev=0.83	Peak Area	0	0	0
HIE with sampling at different times (A)	HIE-3h	ESI1	1	ADO IS	sample0022_135922	8000086431	Initial	MRM+	273.10/136.10	IS		9.44	0	434363	14727	0	0	0	0	Savitzky-Golay,7,2	0.13/0.80	0.176	NBS: Internal Standard;	Peak Area	0	0	0
HIE with sampling at different times (A)	HIE-3h	ESI1	1	D-ADO	sample0022_135922	8000086431	Initial	MRM+	252.10/136.10	Qualifier	D-ADO IS	0	0.023	1338	105	0	0	564393	17339	Savitzky-Golay,7,2	0.13/0.80	0.293	NBS: ISConc=9.82;	Peak Area	0	0	0
HIE with sampling at different times (A)	HIE-3h	ESI1	1	D-ADO IS	sample0022_135922	8000086431	Initial	MRM+	257.10/136.10	IS		9.82	0	564393	17339	0	0	0	0	Savitzky-Golay,7,2	0.13/0.80	0.176	NBS: Internal Standard;	Peak Area	0	0	0
HIE with sampling at different times (A)	HIE-3h	ESI1	1	C20:0-LPC	sample0022_135922	8000086431	Initial	MRM+	552.40/104.10	Qualifier	C26:0-LPC IS	0	2.499	158236	4709	0	0	278567	7601	Savitzky-Golay,7,2	0.13/0.80	0.176	NBS: ISConc=-1;	Peak Area	0	0	0
HIE with sampling at different times (A)	HIE-3h	ESI1	1	C22:0-LPC	sample0022_135922	8000086431	Initial	MRM+	580.40/104.10	Qualifier	C26:0-LPC IS	0	1.371	86777	2574	0	0	278567	7601	Savitzky-Golay,7,2	0.13/0.80	0.176	NBS: ISConc=-1;	Peak Area	0	0	0
HIE with sampling at different times (A)	HIE-3h	ESI1	1	C24:0-LPC	sample0022_135922	8000086431	Initial	MRM+	608.50/104.10	Qualifier	C26:0-LPC IS	0	1.792	113444	3455	0	0	278567	7601	Savitzky-Golay,7,2	0.13/0.80	0.411	NBS: ISConc=-1;	Peak Area	0	0	0
HIE with sampling at different times (A)	HIE-3h	ESI1	1	C26:0-LPC	sample0022_135922	8000086431	Initial	MRM+	636.50/104.10	Qualifier	C26:0-LPC IS	0	0.443	31168	1209	0	0	278567	7601	Savitzky-Golay,7,2	0.13/0.80	0.264	NBS: ISConc=4.4; LC: TargetConc=0.92, Stdev=0.11; HC: TargetConc=3.04, Stdev=0.36	Peak Area	0	0	0
HIE with sampling at different times (A)	HIE-3h	ESI1	1	C26:0-LPC IS	sample0022_135922	8000086431	Initial	MRM+	640.50/104.10	IS		4.4	0	278567	7601	0	0	0	0	Savitzky-Golay,7,2	0.13/0.80	0.704	NBS: Internal Standard;	Peak Area	0	0	0
HIE with sampling at different times (A)	HIE-3h	ESI1	1	ASA	sample0022_135922	8000086431	Initial	MRM+	291.10/70.10	Qualifier	Arg IS	0	1.045	21277	737	0	0	965312	26355	Savitzky-Golay,7,2	0.13/0.80	0.499	NBS: --	Peak Area	0	0	0
HIE with sampling at different times (A)	HIE-3h	ESI1	1	ASA anhydride I + II	sample0022_135922	8000086431	Initial	MRM+	273.10/70.10	Qualifier	Arg IS	0	0.295	6004	209	0	0	965312	26355	Savitzky-Golay,7,2	0.13/0.80	0.616	NBS: --	Peak Area	0	0	0
HIE with sampling at different times (A)	HIE-3h			ASATotal	sample0022_135922	8000086431	Initial	N/A	0.00/0.00	Qualifier	Arg IS	0	1.353	27281	946	0	0	965312	26355	Savitzky-Golay,7,2	0.13/0.80	0	NBS: ISConc=-1; Initial: LimitLow=0, LimitHigh=1.5; Retest: LimitLow=0, LimitHigh=1.5; Recall: LimitLow=0, LimitHigh=1.5; Recall retest: LimitLow=0, LimitHigh=1.5; LC: TargetConc=2.22, Stdev=0.38; HC: TargetConc=39, Stdev=4.7	Peak Area	0.75	0	1.5
HIE with sampling at different times (A)	HIE-3h	ESI1	1	Ala	sample0023_140106	8000086432	Initial	MRM+	90.10/44.00	Qualifier	Ala IS	0	538.905	1094333	30289	0	0	277896	7992	Savitzky-Golay,7,2	0.13/0.80	0.205	NBS: ISConc=115; Initial: LimitLow=0, LimitHigh=10000; Retest: LimitLow=0, LimitHigh=10000; Recall: LimitLow=0, LimitHigh=10000; Recall retest: LimitLow=0, LimitHigh=10000; LC: TargetConc=479, Stdev=57; HC: TargetConc=967, Stdev=116	Peak Area	5000	0	10000
HIE with sampling at different times (A)	HIE-3h	ESI1	1	Ala IS	sample0023_140106	8000086432	Initial	MRM+	93.10/47.10	IS		115	0	277896	7992	0	0	0	0	Savitzky-Golay,7,2	0.13/0.80	0.323	NBS: Internal Standard;	Peak Area	0	0	0
HIE with sampling at different times (A)	HIE-3h	ESI1	1	Arg	sample0023_140106	8000086432	Initial	MRM+	175.10/70.10	Qualifier	Arg IS	0	134.169	2654097	72065	0	0	947034	25892	Savitzky-Golay,7,2	0.13/0.80	0.205	NBS: ISConc=47.4; Initial: LimitLow=0, LimitHigh=70; Retest: LimitLow=0, LimitHigh=70; Recall: LimitLow=0, LimitHigh=70; Recall retest: LimitLow=0, LimitHigh=70; LC: TargetConc=24.2, Stdev=2.9; HC: TargetConc=136, Stdev=16	Peak Area	35	0	70
HIE with sampling at different times (A)	HIE-3h	ESI1	1	Arg IS	sample0023_140106	8000086432	Initial	MRM+	180.10/75.10	IS		47.4	0	947034	25892	0	0	0	0	Savitzky-Golay,7,2	0.13/0.80	0.469	NBS: Internal Standard;	Peak Area	0	0	0
HIE with sampling at different times (A)	HIE-3h	ESI1	1	Cit	sample0023_140106	8000086432	Initial	MRM+	176.10/113.10	Qualifier	Cit IS	0	45.821	152164	4361	0	0	306956	8522	Savitzky-Golay,7,2	0.13/0.80	0.264	NBS: ISConc=81.8; Initial: LimitLow=0, LimitHigh=80; Retest: LimitLow=0, LimitHigh=80; Recall: LimitLow=0, LimitHigh=80; Recall retest: LimitLow=0, LimitHigh=80; LC: TargetConc=33.1, Stdev=4; HC: TargetConc=147, Stdev=18	Peak Area	40	0	80
HIE with sampling at different times (A)	HIE-3h	ESI1	1	Cit IS	sample0023_140106	8000086432	Initial	MRM+	178.10/115.10	IS		81.8	0	306956	8522	0	0	0	0	Savitzky-Golay,7,2	0.13/0.80	0.557	NBS: Internal Standard;	Peak Area	0	0	0
HIE with sampling at different times (A)	HIE-3h	ESI1	1	Gln\Lys	sample0023_140106	8000086432	Initial	MRM+	147.10/84.00	Qualifier	Gln\Lys IS	0	191.987	1124962	36150	0	0	523671	13858	Savitzky-Golay,7,2	0.13/0.80	0.176	NBS: ISConc=99.3; LC: TargetConc=635, Stdev=76; HC: TargetConc=1350, Stdev=160	Peak Area	0	0	0
HIE with sampling at different times (A)	HIE-3h	ESI1	1	Gln\Lys IS	sample0023_140106	8000086432	Initial	MRM+	152.10/88.10	IS		99.3	0	523671	13858	0	0	0	0	Savitzky-Golay,7,2	0.13/0.80	0.205	NBS: Internal Standard;	Peak Area	0	0	0
HIE with sampling at different times (A)	HIE-3h	ESI1	1	Glu	sample0023_140106	8000086432	Initial	MRM+	148.10/84.00	Qualifier	Gln\Lys IS	0	191.834	1011662	28302	0	0	523671	13858	Savitzky-Golay,7,2	0.13/0.80	0.176	NBS: ISConc=-1;	Peak Area	0	0	0
HIE with sampling at different times (A)	HIE-3h	ESI1	1	Gly	sample0023_140106	8000086432	Initial	MRM+	76.00/30.00	Qualifier	Gly IS	0	273.577	220361	6660	0	0	481065	13358	Savitzky-Golay,7,2	0.13/0.80	0.235	NBS: ISConc=553; LC: TargetConc=549, Stdev=66; HC: TargetConc=1320, Stdev=160	Peak Area	0	0	0
HIE with sampling at different times (A)	HIE-3h	ESI1	1	Gly IS	sample0023_140106	8000086432	Initial	MRM+	78.00/32.00	IS		553	0	481065	13358	0	0	0	0	Savitzky-Golay,7,2	0.13/0.80	0.205	NBS: Internal Standard;	Peak Area	0	0	0
HIE with sampling at different times (A)	HIE-3h	ESI1	1	Leu\Ile\Pro-OH	sample0023_140106	8000086432	Initial	MRM+	132.10/86.10	Qualifier	Leu\Ile\Pro-OH IS	0	240.955	7324407	223388	0	0	3100837	91724	Savitzky-Golay,7,2	0.13/0.80	0.205	NBS: ISConc=101; Initial: LimitLow=0, LimitHigh=380; Retest: LimitLow=0, LimitHigh=380; Recall: LimitLow=0, LimitHigh=380; Recall retest: LimitLow=0, LimitHigh=380; LC: TargetConc=183, Stdev=22; HC: TargetConc=772, Stdev=93	Peak Area	190	0	380
HIE with sampling at different times (A)	HIE-3h	ESI1	1	Leu\Ile\Pro-OH IS	sample0023_140106	8000086432	Initial	MRM+	135.10/89.10	IS		101	0	3100837	91724	0	0	0	0	Savitzky-Golay,7,2	0.13/0.80	0.176	NBS: Internal Standard;	Peak Area	0	0	0
HIE with sampling at different times (A)	HIE-3h	ESI1	1	Met	sample0023_140106	8000086432	Initial	MRM+	150.10/104.10	Qualifier	Met IS	0	15.34	70192	2346	0	0	529186	16272	Savitzky-Golay,7,2	0.13/0.80	0.205	NBS: ISConc=99.7; Initial: LimitLow=7, LimitHigh=80; Retest: LimitLow=7, LimitHigh=80; Recall: LimitLow=7, LimitHigh=80; Recall retest: LimitLow=7, LimitHigh=80; LC: TargetConc=36, Stdev=4.3; HC: TargetConc=177, Stdev=21	Peak Area	43.5	7	80
HIE with sampling at different times (A)	HIE-3h	ESI1	1	Met IS	sample0023_140106	8000086432	Initial	MRM+	153.10/107.10	IS		99.7	0	529186	16272	0	0	0	0	Savitzky-Golay,7,2	0.13/0.80	0.205	NBS: Internal Standard;	Peak Area	0	0	0
HIE with sampling at different times (A)	HIE-3h	ESI1	1	Orn	sample0023_140106	8000086432	Initial	MRM+	133.10/70.10	Qualifier	Orn IS	0	15.197	105220	2935	0	0	754671	22442	Savitzky-Golay,7,2	0.13/0.80	0.557	NBS: ISConc=109; LC: TargetConc=154, Stdev=18; HC: TargetConc=488, Stdev=59	Peak Area	0	0	0
HIE with sampling at different times (A)	HIE-3h	ESI1	1	Orn IS	sample0023_140106	8000086432	Initial	MRM+	139.10/76.10	IS		109	0	754671	22442	0	0	0	0	Savitzky-Golay,7,2	0.13/0.80	0.205	NBS: Internal Standard;	Peak Area	0	0	0
HIE with sampling at different times (A)	HIE-3h	ESI1	1	Phe	sample0023_140106	8000086432	Initial	MRM+	166.10/120.10	Qualifier	Phe IS	0	65.054	2515667	72654	0	0	2998680	82255	Savitzky-Golay,7,2	0.13/0.80	0.205	NBS: ISConc=71.8; Initial: LimitLow=0, LimitHigh=120; Retest: LimitLow=0, LimitHigh=120; Recall: LimitLow=0, LimitHigh=120; Recall retest: LimitLow=0, LimitHigh=120; LC: TargetConc=79.4, Stdev=9.5; HC: TargetConc=264, Stdev=32	Peak Area	60	0	120
HIE with sampling at different times (A)	HIE-3h	ESI1	1	Phe IS	sample0023_140106	8000086432	Initial	MRM+	172.10/126.10	IS		71.8	0	2998680	82255	0	0	0	0	Savitzky-Golay,7,2	0.13/0.80	0.205	NBS: Internal Standard;	Peak Area	0	0	0
HIE with sampling at different times (A)	HIE-3h	ESI1	1	Pro	sample0023_140106	8000086432	Initial	MRM+	116.10/70.10	Qualifier	Pro IS	0	144.591	3371287	91422	0	0	1826115	48738	Savitzky-Golay,7,2	0.13/0.80	0.44	NBS: ISConc=88; LC: TargetConc=235, Stdev=28; HC: TargetConc=683, Stdev=82	Peak Area	0	0	0
HIE with sampling at different times (A)	HIE-3h	ESI1	1	Pro IS	sample0023_140106	8000086432	Initial	MRM+	121.10/74.10	IS		88	0	1826115	48738	0	0	0	0	Savitzky-Golay,7,2	0.13/0.80	0.205	NBS: Internal Standard;	Peak Area	0	0	0
HIE with sampling at different times (A)	HIE-3h	ESI1	1	Tyr	sample0023_140106	8000086432	Initial	MRM+	182.10/136.10	Qualifier	Tyr IS	0	154.955	1143712	31528	0	0	1042553	27842	Savitzky-Golay,7,2	0.13/0.80	0.469	NBS: ISConc=113; LC: TargetConc=136, Stdev=16; HC: TargetConc=549, Stdev=66	Peak Area	0	0	0
HIE with sampling at different times (A)	HIE-3h	ESI1	1	Tyr IS	sample0023_140106	8000086432	Initial	MRM+	188.10/142.10	IS		113	0	1042553	27842	0	0	0	0	Savitzky-Golay,7,2	0.13/0.80	0.469	NBS: Internal Standard;	Peak Area	0	0	0
HIE with sampling at different times (A)	HIE-3h	ESI1	1	Val	sample0023_140106	8000086432	Initial	MRM+	118.10/72.10	Qualifier	Val IS	0	152.939	2534670	74531	0	0	2004685	58209	Savitzky-Golay,7,2	0.13/0.80	0.205	NBS: ISConc=108; LC: TargetConc=213, Stdev=26; HC: TargetConc=470, Stdev=56	Peak Area	0	0	0
HIE with sampling at different times (A)	HIE-3h	ESI1	1	Val IS	sample0023_140106	8000086432	Initial	MRM+	124.10/77.10	IS		108	0	2004685	58209	0	0	0	0	Savitzky-Golay,7,2	0.13/0.80	0.176	NBS: Internal Standard;	Peak Area	0	0	0
HIE with sampling at different times (A)	HIE-3h	ESI1	1	C0	sample0023_140106	8000086432	Initial	MRM+	162.10/103.00	Qualifier	C0 IS	0	18.088	460942	13771	0	0	375122	10356	Savitzky-Golay,7,2	0.13/0.80	0.616	NBS: ISConc=11.5; Initial: LimitLow=8, LimitHigh=90; Retest: LimitLow=8, LimitHigh=90; Recall: LimitLow=8, LimitHigh=90; Recall retest: LimitLow=8, LimitHigh=90; LC: TargetConc=41, Stdev=4.9; HC: TargetConc=151, Stdev=18	Peak Area	49	8	90
HIE with sampling at different times (A)	HIE-3h	ESI1	1	C0 IS	sample0023_140106	8000086432	Initial	MRM+	171.20/103.00	IS		11.5	0	375122	10356	0	0	0	0	Savitzky-Golay,7,2	0.13/0.80	0.557	NBS: Internal Standard;	Peak Area	0	0	0
HIE with sampling at different times (A)	HIE-3h	ESI1	1	C2	sample0023_140106	8000086432	Initial	MRM+	204.10/85.00	Qualifier	C2 IS	0	4.272	652500	17499	0	0	803089	23112	Savitzky-Golay,7,2	0.13/0.80	0.381	NBS: ISConc=4.78; Initial: LimitLow=0, LimitHigh=115; Retest: LimitLow=0, LimitHigh=115; Recall: LimitLow=0, LimitHigh=115; Recall retest: LimitLow=0, LimitHigh=115; LC: TargetConc=27.6, Stdev=3.3; HC: TargetConc=82.4, Stdev=9.9	Peak Area	57.5	0	115
HIE with sampling at different times (A)	HIE-3h	ESI1	1	C2 IS	sample0023_140106	8000086432	Initial	MRM+	207.10/85.00	IS		4.78	0	803089	23112	0	0	0	0	Savitzky-Golay,7,2	0.13/0.80	0.44	NBS: Internal Standard;	Peak Area	0	0	0
HIE with sampling at different times (A)	HIE-3h	ESI1	1	C3	sample0023_140106	8000086432	Initial	MRM+	218.10/85.00	Qualifier	C3 IS	0	0.15	28038	945	0	0	378529	10623	Savitzky-Golay,7,2	0.13/0.80	0.675	NBS: ISConc=2.03; Initial: LimitLow=0, LimitHigh=6.8; Retest: LimitLow=0, LimitHigh=6.8; Recall: LimitLow=0, LimitHigh=6.8; Recall retest: LimitLow=0, LimitHigh=6.8; LC: TargetConc=4.63, Stdev=0.56; HC: TargetConc=13.3, Stdev=1.6	Peak Area	3.4	0	6.8
HIE with sampling at different times (A)	HIE-3h	ESI1	1	C3 IS	sample0023_140106	8000086432	Initial	MRM+	221.20/85.00	IS		2.03	0	378529	10623	0	0	0	0	Savitzky-Golay,7,2	0.13/0.80	0.763	NBS: Internal Standard;	Peak Area	0	0	0
HIE with sampling at different times (A)	HIE-3h	ESI1	1	C3DC\C4OH	sample0023_140106	8000086432	Initial	MRM+	248.10/85.00	Qualifier	C4 IS	0	0.162	38334	1263	0	0	342819	9980	Savitzky-Golay,7,2	0.13/0.80	0.763	NBS: ISConc=-1; Initial: LimitLow=0, LimitHigh=10; Retest: LimitLow=0.04, LimitHigh=10; Recall: LimitLow=0.04, LimitHigh=10; Recall retest: LimitLow=0.04, LimitHigh=10	Peak Area	5	0	10
HIE with sampling at different times (A)	HIE-3h	ESI1	1	C4	sample0023_140106	8000086432	Initial	MRM+	232.20/85.00	Qualifier	C4 IS	0	0.027	6466	273	0	0	342819	9980	Savitzky-Golay,7,2	0.13/0.80	0.264	NBS: ISConc=1.45; Initial: LimitLow=0, LimitHigh=1.5; Retest: LimitLow=0, LimitHigh=1.5; Recall: LimitLow=0, LimitHigh=1.5; Recall retest: LimitLow=0, LimitHigh=1.5; LC: TargetConc=0.74, Stdev=0.1; HC: TargetConc=2.74, Stdev=0.33	Peak Area	0.75	0	1.5
HIE with sampling at different times (A)	HIE-3h	ESI1	1	C4 IS	sample0023_140106	8000086432	Initial	MRM+	235.20/85.00	IS		1.45	0	342819	9980	0	0	0	0	Savitzky-Golay,7,2	0.13/0.80	0.763	NBS: Internal Standard;	Peak Area	0	0	0
HIE with sampling at different times (A)	HIE-3h	ESI1	1	C4DC\C5OH	sample0023_140106	8000086432	Initial	MRM+	262.20/85.00	Qualifier	C5 IS	0	0.039	9542	362	0	0	371231	10684	Savitzky-Golay,7,2	0.13/0.80	0.205	NBS: ISConc=-1; Initial: LimitLow=0, LimitHigh=0.5; Retest: LimitLow=0, LimitHigh=0.5; Recall: LimitLow=0, LimitHigh=0.5; Recall retest: LimitLow=0, LimitHigh=0.5	Peak Area	0.25	0	0.5
HIE with sampling at different times (A)	HIE-3h	ESI1	1	C5	sample0023_140106	8000086432	Initial	MRM+	246.20/85.00	Qualifier	C5 IS	0	0.042	10612	463	0	0	371231	10684	Savitzky-Golay,7,2	0.13/0.80	0.235	NBS: ISConc=1.52; Initial: LimitLow=0, LimitHigh=0.56; Retest: LimitLow=0, LimitHigh=0.56; Recall: LimitLow=0, LimitHigh=0.56; Recall retest: LimitLow=0, LimitHigh=0.56; LC: TargetConc=0.63, Stdev=0.08; HC: TargetConc=2.46, Stdev=0.3	Peak Area	0.28	0	0.56
HIE with sampling at different times (A)	HIE-3h	ESI1	1	C5 IS	sample0023_140106	8000086432	Initial	MRM+	255.20/85.00	IS		1.52	0	371231	10684	0	0	0	0	Savitzky-Golay,7,2	0.13/0.80	0.763	NBS: Internal Standard;	Peak Area	0	0	0
HIE with sampling at different times (A)	HIE-3h	ESI1	1	C5:1	sample0023_140106	8000086432	Initial	MRM+	244.20/85.00	Qualifier	C5 IS	0	0.024	5972	196	0	0	371231	10684	Savitzky-Golay,7,2	0.13/0.80	0.323	NBS: ISConc=-1; Initial: LimitLow=0, LimitHigh=0.15; Retest: LimitLow=0, LimitHigh=0.15; Recall: LimitLow=0, LimitHigh=0.15; Recall retest: LimitLow=0, LimitHigh=0.15	Peak Area	0.075	0	0.15
HIE with sampling at different times (A)	HIE-3h	ESI1	1	C5DC\C6OH	sample0023_140106	8000086432	Initial	MRM+	276.20/85.00	Qualifier	C5DC\C6OH IS	0	0.026	2036	96	0	0	118291	3356	Savitzky-Golay,7,2	0.13/0.80	0.645	NBS: ISConc=1.49; Initial: LimitLow=0, LimitHigh=0.3; Retest: LimitLow=0, LimitHigh=0.3; Recall: LimitLow=0, LimitHigh=0.3; Recall retest: LimitLow=0, LimitHigh=0.3; LC: TargetConc=0.39, Stdev=0.09; HC: TargetConc=1.98, Stdev=0.24	Peak Area	0.15	0	0.3
HIE with sampling at different times (A)	HIE-3h	ESI1	1	C5DC\C6OH IS	sample0023_140106	8000086432	Initial	MRM+	282.20/85.00	IS		1.49	0	118291	3356	0	0	0	0	Savitzky-Golay,7,2	0.13/0.80	0.293	NBS: Internal Standard;	Peak Area	0	0	0
HIE with sampling at different times (A)	HIE-3h	ESI1	1	C6	sample0023_140106	8000086432	Initial	MRM+	260.20/85.00	Qualifier	C6 IS	0	0.007	1719	101	0	0	291967	8398	Savitzky-Golay,7,2	0.13/0.80	0.176	NBS: ISConc=1.03; Initial: LimitLow=0, LimitHigh=0.2; Retest: LimitLow=0, LimitHigh=0.2; Recall: LimitLow=0, LimitHigh=0.2; Recall retest: LimitLow=0, LimitHigh=0.2; LC: TargetConc=0.29, Stdev=0.09; HC: TargetConc=1.4, Stdev=0.17	Peak Area	0.1	0	0.2
HIE with sampling at different times (A)	HIE-3h	ESI1	1	C6 IS	sample0023_140106	8000086432	Initial	MRM+	263.20/85.00	IS		1.03	0	291967	8398	0	0	0	0	Savitzky-Golay,7,2	0.13/0.80	0.176	NBS: Internal Standard;	Peak Area	0	0	0
HIE with sampling at different times (A)	HIE-3h	ESI1	1	C6DC	sample0023_140106	8000086432	Initial	MRM+	290.20/85.00	Qualifier	C5DC\C6OH IS	0	0.05	3950	166	0	0	118291	3356	Savitzky-Golay,7,2	0.13/0.80	0.763	NBS: ISConc=-1;	Peak Area	0	0	0
HIE with sampling at different times (A)	HIE-3h	ESI1	1	C8	sample0023_140106	8000086432	Initial	MRM+	288.20/85.00	Qualifier	C8 IS	0	0.059	16353	568	0	0	291176	8586	Savitzky-Golay,7,2	0.13/0.80	0.235	NBS: ISConc=1.04; Initial: LimitLow=0, LimitHigh=0.4; Retest: LimitLow=0, LimitHigh=0.4; Recall: LimitLow=0, LimitHigh=0.4; Recall retest: LimitLow=0, LimitHigh=0.4; LC: TargetConc=0.55, Stdev=0.08; HC: TargetConc=2.76, Stdev=0.33	Peak Area	0.2	0	0.4
HIE with sampling at different times (A)	HIE-3h	ESI1	1	C8 IS	sample0023_140106	8000086432	Initial	MRM+	291.20/85.00	IS		1.04	0	291176	8586	0	0	0	0	Savitzky-Golay,7,2	0.13/0.80	0.176	NBS: Internal Standard;	Peak Area	0	0	0
HIE with sampling at different times (A)	HIE-3h	ESI1	1	C8:1	sample0023_140106	8000086432	Initial	MRM+	286.20/85.00	Qualifier	C8 IS	0	0.019	5262	182	0	0	291176	8586	Savitzky-Golay,7,2	0.13/0.80	0.205	NBS: ISConc=-1;	Peak Area	0	0	0
HIE with sampling at different times (A)	HIE-3h	ESI1	1	C10	sample0023_140106	8000086432	Initial	MRM+	316.20/85.00	Qualifier	C10 IS	0	0.116	34655	1123	0	0	327317	9034	Savitzky-Golay,7,2	0.13/0.80	0.176	NBS: ISConc=0.91; Initial: LimitLow=0, LimitHigh=0.29; Retest: LimitLow=0, LimitHigh=0.29; Recall: LimitLow=0, LimitHigh=0.29; Recall retest: LimitLow=0, LimitHigh=0.29; LC: TargetConc=0.31, Stdev=0.09; HC: TargetConc=2.02, Stdev=0.24	Peak Area	0.145	0	0.29
HIE with sampling at different times (A)	HIE-3h	ESI1	1	C10 IS	sample0023_140106	8000086432	Initial	MRM+	319.30/85.00	IS		0.91	0	327317	9034	0	0	0	0	Savitzky-Golay,7,2	0.13/0.80	0.176	NBS: Internal Standard;	Peak Area	0	0	0
HIE with sampling at different times (A)	HIE-3h	ESI1	1	C10:1	sample0023_140106	8000086432	Initial	MRM+	314.20/85.00	Qualifier	C10 IS	0	0.026	9390	338	0	0	327317	9034	Savitzky-Golay,7,2	0.13/0.80	0.147	NBS: ISConc=-1; Initial: LimitLow=0, LimitHigh=0.3; Retest: LimitLow=0, LimitHigh=0.3; Recall: LimitLow=0, LimitHigh=0.3; Recall retest: LimitLow=0, LimitHigh=0.3	Peak Area	0.15	0	0.3
HIE with sampling at different times (A)	HIE-3h	ESI1	1	C10:2	sample0023_140106	8000086432	Initial	MRM+	312.20/85.00	Qualifier	C10 IS	0	0.005	1804	120	0	0	327317	9034	Savitzky-Golay,7,2	0.13/0.80	0.205	NBS: ISConc=-1; Initial: LimitLow=0, LimitHigh=100; Retest: LimitLow=0, LimitHigh=100; Recall: LimitLow=0, LimitHigh=100; Recall retest: LimitLow=0, LimitHigh=100	Peak Area	50	0	100
HIE with sampling at different times (A)	HIE-3h	ESI1	1	C12	sample0023_140106	8000086432	Initial	MRM+	344.30/85.00	Qualifier	C12 IS	0	0.187	73420	2298	0	0	408206	11283	Savitzky-Golay,7,2	0.13/0.80	0.499	NBS: ISConc=1; Initial: LimitLow=0, LimitHigh=0.33; Retest: LimitLow=0, LimitHigh=0.33; Recall: LimitLow=0, LimitHigh=0.33; Recall retest: LimitLow=0, LimitHigh=0.33; LC: TargetConc=0.28, Stdev=0.09; HC: TargetConc=1.36, Stdev=0.16	Peak Area	0.165	0	0.33
HIE with sampling at different times (A)	HIE-3h	ESI1	1	C12 IS	sample0023_140106	8000086432	Initial	MRM+	347.30/85.00	IS		1	0	408206	11283	0	0	0	0	Savitzky-Golay,7,2	0.13/0.80	0.176	NBS: Internal Standard;	Peak Area	0	0	0
HIE with sampling at different times (A)	HIE-3h	ESI1	1	C12:1	sample0023_140106	8000086432	Initial	MRM+	342.30/85.00	Qualifier	C12 IS	0	0.019	7907	279	0	0	408206	11283	Savitzky-Golay,7,2	0.13/0.80	0.557	NBS: ISConc=-1; Initial: LimitLow=0, LimitHigh=1000; Retest: LimitLow=0, LimitHigh=1000; Recall: LimitLow=0, LimitHigh=1000; Recall retest: LimitLow=0, LimitHigh=10000	Peak Area	500	0	1000
HIE with sampling at different times (A)	HIE-3h	ESI1	1	C14	sample0023_140106	8000086432	Initial	MRM+	372.30/85.00	Qualifier	C14 IS	0	0.44	227154	6722	0	0	563560	15288	Savitzky-Golay,7,2	0.13/0.80	0.205	NBS: ISConc=1.02; Initial: LimitLow=0, LimitHigh=0.59; Retest: LimitLow=0, LimitHigh=0.59; Recall: LimitLow=0, LimitHigh=0.59; Recall retest: LimitLow=0, LimitHigh=0.59; LC: TargetConc=0.33, Stdev=0.09; HC: TargetConc=1.9, Stdev=0.23	Peak Area	0.295	0	0.59
HIE with sampling at different times (A)	HIE-3h	ESI1	1	C14 IS	sample0023_140106	8000086432	Initial	MRM+	375.30/85.00	IS		1.02	0	563560	15288	0	0	0	0	Savitzky-Golay,7,2	0.13/0.80	0.235	NBS: Internal Standard;	Peak Area	0	0	0
HIE with sampling at different times (A)	HIE-3h	ESI1	1	C14:1	sample0023_140106	8000086432	Initial	MRM+	370.30/85.00	Qualifier	C14 IS	0	0.053	29094	997	0	0	563560	15288	Savitzky-Golay,7,2	0.13/0.80	0.587	NBS: ISConc=-1; Initial: LimitLow=0, LimitHigh=0.32; Retest: LimitLow=0, LimitHigh=0.32; Recall: LimitLow=0, LimitHigh=0.32; Recall retest: LimitLow=0, LimitHigh=0.32	Peak Area	0.16	0	0.32
HIE with sampling at different times (A)	HIE-3h	ESI1	1	C14:2	sample0023_140106	8000086432	Initial	MRM+	368.30/85.00	Qualifier	C14 IS	0	0.006	3187	150	0	0	563560	15288	Savitzky-Golay,7,2	0.13/0.80	0.205	NBS: ISConc=-1;	Peak Area	0	0	0
HIE with sampling at different times (A)	HIE-3h	ESI1	1	C14OH	sample0023_140106	8000086432	Initial	MRM+	388.30/85.00	Qualifier	C14 IS	0	0	0	0	0	0	563560	15288	Savitzky-Golay,7,2	0.13/0.80	0.763	NBS: ISConc=-1; Initial: LimitLow=0, LimitHigh=0.2; Retest: LimitLow=0, LimitHigh=0.2; Recall: LimitLow=0, LimitHigh=0.2; Recall retest: LimitLow=0, LimitHigh=0.2	Peak Area	0.1	0	0.2
HIE with sampling at different times (A)	HIE-3h	ESI1	1	C16	sample0023_140106	8000086432	Initial	MRM+	400.30/85.00	Qualifier	C16 IS	0	1.899	1047817	28770	0	0	525497	14549	Savitzky-Golay,7,2	0.13/0.80	0.176	NBS: ISConc=0.89; Initial: LimitLow=0.3, LimitHigh=8.5; Retest: LimitLow=0.3, LimitHigh=8.5; Recall: LimitLow=0.3, LimitHigh=8.5; Recall retest: LimitLow=0.3, LimitHigh=8.5; LC: TargetConc=2.02, Stdev=0.24; HC: TargetConc=11.7, Stdev=1.4	Peak Area	4.4	0.3	8.5
HIE with sampling at different times (A)	HIE-3h	ESI1	1	C16 IS	sample0023_140106	8000086432	Initial	MRM+	403.40/85.00	IS		0.89	0	525497	14549	0	0	0	0	Savitzky-Golay,7,2	0.13/0.80	0.176	NBS: Internal Standard;	Peak Area	0	0	0
HIE with sampling at different times (A)	HIE-3h	ESI1	1	C16:1	sample0023_140106	8000086432	Initial	MRM+	398.30/85.00	Qualifier	C16 IS	0	0.073	43082	1445	0	0	525497	14549	Savitzky-Golay,7,2	0.13/0.80	0.205	NBS: ISConc=-1;	Peak Area	0	0	0
HIE with sampling at different times (A)	HIE-3h	ESI1	1	C16OH	sample0023_140106	8000086432	Initial	MRM+	416.30/85.00	Qualifier	C16 IS	0	0.022	12856	382	0	0	525497	14549	Savitzky-Golay,7,2	0.13/0.80	0.44	NBS: ISConc=-1; Initial: LimitLow=0, LimitHigh=0.19; Retest: LimitLow=0, LimitHigh=0.19; Recall: LimitLow=0, LimitHigh=0.19; Recall retest: LimitLow=0, LimitHigh=0.19	Peak Area	0.095	0	0.19
HIE with sampling at different times (A)	HIE-3h	ESI1	1	C16:1OH\C17	sample0023_140106	8000086432	Initial	MRM+	414.30/85.00	Qualifier	C16 IS	0	0.074	43751	1404	0	0	525497	14549	Savitzky-Golay,7,2	0.13/0.80	0.147	NBS: ISConc=-1; Initial: LimitLow=0, LimitHigh=0.22; Retest: LimitLow=0, LimitHigh=0.22; Recall: LimitLow=0, LimitHigh=0.22; Recall retest: LimitLow=0, LimitHigh=0.22	Peak Area	0.11	0	0.22
HIE with sampling at different times (A)	HIE-3h	ESI1	1	C18	sample0023_140106	8000086432	Initial	MRM+	428.40/85.00	Qualifier	C18 IS	0	0.68	379335	10318	0	0	621135	16949	Savitzky-Golay,7,2	0.13/0.80	0.176	NBS: ISConc=0.92; Initial: LimitLow=0.13, LimitHigh=2.5; Retest: LimitLow=0.13, LimitHigh=2.5; Recall: LimitLow=0.13, LimitHigh=2.5; Recall retest: LimitLow=0.13, LimitHigh=2.5; LC: TargetConc=1.14, Stdev=0.14; HC: TargetConc=4.32, Stdev=0.52	Peak Area	1.315	0.13	2.5
HIE with sampling at different times (A)	HIE-3h	ESI1	1	C18 IS	sample0023_140106	8000086432	Initial	MRM+	431.40/85.00	IS		0.92	0	621135	16949	0	0	0	0	Savitzky-Golay,7,2	0.13/0.80	0.147	NBS: Internal Standard;	Peak Area	0	0	0
HIE with sampling at different times (A)	HIE-3h	ESI1	1	C18:1	sample0023_140106	8000086432	Initial	MRM+	426.40/85.00	Qualifier	C18 IS	0	0.781	527260	14488	0	0	621135	16949	Savitzky-Golay,7,2	0.13/0.80	0.176	NBS: ISConc=-1; Initial: LimitLow=0.15, LimitHigh=3.35; Retest: LimitLow=0.15, LimitHigh=3.35; Recall: LimitLow=0.15, LimitHigh=3.35; Recall retest: LimitLow=0.15, LimitHigh=3.35	Peak Area	1.75	0.15	3.35
HIE with sampling at different times (A)	HIE-3h	ESI1	1	C18:2	sample0023_140106	8000086432	Initial	MRM+	424.30/85.00	Qualifier	C18 IS	0	0.012	8190	272	0	0	621135	16949	Savitzky-Golay,7,2	0.13/0.80	0.235	NBS: ISConc=-1;	Peak Area	0	0	0
HIE with sampling at different times (A)	HIE-3h	ESI1	1	C18OH	sample0023_140106	8000086432	Initial	MRM+	444.40/85.00	Qualifier	C18 IS	0	0.02	13337	424	0	0	621135	16949	Savitzky-Golay,7,2	0.13/0.80	0.44	NBS: ISConc=-1; Initial: LimitLow=0, LimitHigh=0.14; Retest: LimitLow=0, LimitHigh=0.14; Recall: LimitLow=0, LimitHigh=0.14; Recall retest: LimitLow=0, LimitHigh=0.14	Peak Area	0.07	0	0.14
HIE with sampling at different times (A)	HIE-3h	ESI1	1	C18:1OH	sample0023_140106	8000086432	Initial	MRM+	442.40/85.00	Qualifier	C18 IS	0	0.048	32670	927	0	0	621135	16949	Savitzky-Golay,7,2	0.13/0.80	0.147	NBS: ISConc=-1; Initial: LimitLow=0, LimitHigh=0.16; Retest: LimitLow=0, LimitHigh=0.16; Recall: LimitLow=0, LimitHigh=0.16; Recall retest: LimitLow=0, LimitHigh=0.16	Peak Area	0.08	0	0.16
HIE with sampling at different times (A)	HIE-3h	ESI1	1	C18:2OH	sample0023_140106	8000086432	Initial	MRM+	440.30/85.00	Qualifier	C18 IS	0	0.055	36839	1328	0	0	621135	16949	Savitzky-Golay,7,2	0.13/0.80	0.205	NBS: ISConc=-1;	Peak Area	0	0	0
HIE with sampling at different times (A)	HIE-3h	ESI1	1	C20	sample0023_140106	8000086432	Initial	MRM+	456.40/85.00	Qualifier	C26 IS	0	0.035	31001	941	0	0	978191	26572	Savitzky-Golay,7,2	0.13/0.80	0.264	NBS: ISConc=-1;	Peak Area	0	0	0
HIE with sampling at different times (A)	HIE-3h	ESI1	1	C22	sample0023_140106	8000086432	Initial	MRM+	484.40/85.00	Qualifier	C26 IS	0	0.016	14550	586	0	0	978191	26572	Savitzky-Golay,7,2	0.13/0.80	0.235	NBS: ISConc=-1;	Peak Area	0	0	0
HIE with sampling at different times (A)	HIE-3h	ESI1	1	C24	sample0023_140106	8000086432	Initial	MRM+	512.50/85.00	Qualifier	C26 IS	0	0.039	35051	986	0	0	978191	26572	Savitzky-Golay,7,2	0.13/0.80	0.352	NBS: ISConc=-1;	Peak Area	0	0	0
HIE with sampling at different times (A)	HIE-3h	ESI1	1	C26	sample0023_140106	8000086432	Initial	MRM+	540.50/85.00	Qualifier	C26 IS	0	0.006	5350	237	0	0	978191	26572	Savitzky-Golay,7,2	0.13/0.80	0.499	NBS: ISConc=1.09; LC: TargetConc=0.61, Stdev=0.09; HC: TargetConc=1.66, Stdev=0.2	Peak Area	0	0	0
HIE with sampling at different times (A)	HIE-3h	ESI1	1	C26 IS	sample0023_140106	8000086432	Initial	MRM+	543.50/85.00	IS		1.09	0	978191	26572	0	0	0	0	Savitzky-Golay,7,2	0.13/0.80	0.616	NBS: Internal Standard;	Peak Area	0	0	0
HIE with sampling at different times (A)	HIE-3h	ESI1	1	SA	sample0023_140106	8000086432	Initial	MRM+	155.10/109.10	Qualifier	SA IS	0	0.444	11472	377	0	0	1502313	40772	Savitzky-Golay,7,2	0.13/0.80	0.645	NBS: ISConc=58.1; Initial: LimitLow=0, LimitHigh=2; Retest: LimitLow=0, LimitHigh=2; Recall: LimitLow=0, LimitHigh=2; Recall retest: LimitLow=0, LimitHigh=2; LC: TargetConc=2.57, Stdev=0.38; HC: TargetConc=10.4, Stdev=1.2	Peak Area	1	0	2
HIE with sampling at different times (A)	HIE-3h	ESI1	1	SA IS	sample0023_140106	8000086432	Initial	MRM+	160.10/114.10	IS		58.1	0	1502313	40772	0	0	0	0	Savitzky-Golay,7,2	0.13/0.80	0.205	NBS: Internal Standard;	Peak Area	0	0	0
HIE with sampling at different times (A)	HIE-3h	ESI1	1	ADO	sample0023_140106	8000086432	Initial	MRM+	268.10/136.10	Qualifier	ADO IS	0	0.111	8400	420	0	0	500583	15979	Savitzky-Golay,7,2	0.13/0.80	0.235	NBS: ISConc=9.44; LC: TargetConc=2.51, Stdev=0.34; HC: TargetConc=6.91, Stdev=0.83	Peak Area	0	0	0
HIE with sampling at different times (A)	HIE-3h	ESI1	1	ADO IS	sample0023_140106	8000086432	Initial	MRM+	273.10/136.10	IS		9.44	0	500583	15979	0	0	0	0	Savitzky-Golay,7,2	0.13/0.80	0.205	NBS: Internal Standard;	Peak Area	0	0	0
HIE with sampling at different times (A)	HIE-3h	ESI1	1	D-ADO	sample0023_140106	8000086432	Initial	MRM+	252.10/136.10	Qualifier	D-ADO IS	0	0.037	2116	112	0	0	556233	16779	Savitzky-Golay,7,2	0.13/0.80	0.469	NBS: ISConc=9.82;	Peak Area	0	0	0
HIE with sampling at different times (A)	HIE-3h	ESI1	1	D-ADO IS	sample0023_140106	8000086432	Initial	MRM+	257.10/136.10	IS		9.82	0	556233	16779	0	0	0	0	Savitzky-Golay,7,2	0.13/0.80	0.176	NBS: Internal Standard;	Peak Area	0	0	0
HIE with sampling at different times (A)	HIE-3h	ESI1	1	C20:0-LPC	sample0023_140106	8000086432	Initial	MRM+	552.40/104.10	Qualifier	C26:0-LPC IS	0	2.852	176213	5011	0	0	271893	8339	Savitzky-Golay,7,2	0.13/0.80	0.176	NBS: ISConc=-1;	Peak Area	0	0	0
HIE with sampling at different times (A)	HIE-3h	ESI1	1	C22:0-LPC	sample0023_140106	8000086432	Initial	MRM+	580.40/104.10	Qualifier	C26:0-LPC IS	0	1.487	91909	2690	0	0	271893	8339	Savitzky-Golay,7,2	0.13/0.80	0.293	NBS: ISConc=-1;	Peak Area	0	0	0
HIE with sampling at different times (A)	HIE-3h	ESI1	1	C24:0-LPC	sample0023_140106	8000086432	Initial	MRM+	608.50/104.10	Qualifier	C26:0-LPC IS	0	2.359	145802	4040	0	0	271893	8339	Savitzky-Golay,7,2	0.13/0.80	0.704	NBS: ISConc=-1;	Peak Area	0	0	0
HIE with sampling at different times (A)	HIE-3h	ESI1	1	C26:0-LPC	sample0023_140106	8000086432	Initial	MRM+	636.50/104.10	Qualifier	C26:0-LPC IS	0	0.64	43922	1531	0	0	271893	8339	Savitzky-Golay,7,2	0.13/0.80	0.176	NBS: ISConc=4.4; LC: TargetConc=0.92, Stdev=0.11; HC: TargetConc=3.04, Stdev=0.36	Peak Area	0	0	0
HIE with sampling at different times (A)	HIE-3h	ESI1	1	C26:0-LPC IS	sample0023_140106	8000086432	Initial	MRM+	640.50/104.10	IS		4.4	0	271893	8339	0	0	0	0	Savitzky-Golay,7,2	0.13/0.80	0.704	NBS: Internal Standard;	Peak Area	0	0	0
HIE with sampling at different times (A)	HIE-3h	ESI1	1	ASA	sample0023_140106	8000086432	Initial	MRM+	291.10/70.10	Qualifier	Arg IS	0	1.035	20676	808	0	0	947034	25892	Savitzky-Golay,7,2	0.13/0.80	0.205	NBS: --	Peak Area	0	0	0
HIE with sampling at different times (A)	HIE-3h	ESI1	1	ASA anhydride I + II	sample0023_140106	8000086432	Initial	MRM+	273.10/70.10	Qualifier	Arg IS	0	0.325	6487	310	0	0	947034	25892	Savitzky-Golay,7,2	0.13/0.80	0.733	NBS: --	Peak Area	0	0	0
HIE with sampling at different times (A)	HIE-3h			ASATotal	sample0023_140106	8000086432	Initial	N/A	0.00/0.00	Qualifier	Arg IS	0	1.373	27163	1118	0	0	947034	25892	Savitzky-Golay,7,2	0.13/0.80	0	NBS: ISConc=-1; Initial: LimitLow=0, LimitHigh=1.5; Retest: LimitLow=0, LimitHigh=1.5; Recall: LimitLow=0, LimitHigh=1.5; Recall retest: LimitLow=0, LimitHigh=1.5; LC: TargetConc=2.22, Stdev=0.38; HC: TargetConc=39, Stdev=4.7	Peak Area	0.75	0	1.5
HIE with sampling at different times (A)	HIE-3h	ESI1	1	Ala	sample0024_140250	8000086433	Initial	MRM+	90.10/44.00	Qualifier	Ala IS	0	507.896	865799	24780	0	0	233285	6670	Savitzky-Golay,7,2	0.13/0.80	0.205	NBS: ISConc=115; Initial: LimitLow=0, LimitHigh=10000; Retest: LimitLow=0, LimitHigh=10000; Recall: LimitLow=0, LimitHigh=10000; Recall retest: LimitLow=0, LimitHigh=10000; LC: TargetConc=479, Stdev=57; HC: TargetConc=967, Stdev=116	Peak Area	5000	0	10000
HIE with sampling at different times (A)	HIE-3h	ESI1	1	Ala IS	sample0024_140250	8000086433	Initial	MRM+	93.10/47.10	IS		115	0	233285	6670	0	0	0	0	Savitzky-Golay,7,2	0.13/0.80	0.176	NBS: Internal Standard;	Peak Area	0	0	0
HIE with sampling at different times (A)	HIE-3h	ESI1	1	Arg	sample0024_140250	8000086433	Initial	MRM+	175.10/70.10	Qualifier	Arg IS	0	115.627	2122285	58227	0	0	878706	24133	Savitzky-Golay,7,2	0.13/0.80	0.44	NBS: ISConc=47.4; Initial: LimitLow=0, LimitHigh=70; Retest: LimitLow=0, LimitHigh=70; Recall: LimitLow=0, LimitHigh=70; Recall retest: LimitLow=0, LimitHigh=70; LC: TargetConc=24.2, Stdev=2.9; HC: TargetConc=136, Stdev=16	Peak Area	35	0	70
HIE with sampling at different times (A)	HIE-3h	ESI1	1	Arg IS	sample0024_140250	8000086433	Initial	MRM+	180.10/75.10	IS		47.4	0	878706	24133	0	0	0	0	Savitzky-Golay,7,2	0.13/0.80	0.44	NBS: Internal Standard;	Peak Area	0	0	0
HIE with sampling at different times (A)	HIE-3h	ESI1	1	Cit	sample0024_140250	8000086433	Initial	MRM+	176.10/113.10	Qualifier	Cit IS	0	48.299	144952	4040	0	0	277407	7587	Savitzky-Golay,7,2	0.13/0.80	0.44	NBS: ISConc=81.8; Initial: LimitLow=0, LimitHigh=80; Retest: LimitLow=0, LimitHigh=80; Recall: LimitLow=0, LimitHigh=80; Recall retest: LimitLow=0, LimitHigh=80; LC: TargetConc=33.1, Stdev=4; HC: TargetConc=147, Stdev=18	Peak Area	40	0	80
HIE with sampling at different times (A)	HIE-3h	ESI1	1	Cit IS	sample0024_140250	8000086433	Initial	MRM+	178.10/115.10	IS		81.8	0	277407	7587	0	0	0	0	Savitzky-Golay,7,2	0.13/0.80	0.264	NBS: Internal Standard;	Peak Area	0	0	0
HIE with sampling at different times (A)	HIE-3h	ESI1	1	Gln\Lys	sample0024_140250	8000086433	Initial	MRM+	147.10/84.00	Qualifier	Gln\Lys IS	0	187.229	1008270	28577	0	0	481277	13350	Savitzky-Golay,7,2	0.13/0.80	0.176	NBS: ISConc=99.3; LC: TargetConc=635, Stdev=76; HC: TargetConc=1350, Stdev=160	Peak Area	0	0	0
HIE with sampling at different times (A)	HIE-3h	ESI1	1	Gln\Lys IS	sample0024_140250	8000086433	Initial	MRM+	152.10/88.10	IS		99.3	0	481277	13350	0	0	0	0	Savitzky-Golay,7,2	0.13/0.80	0.264	NBS: Internal Standard;	Peak Area	0	0	0
HIE with sampling at different times (A)	HIE-3h	ESI1	1	Glu	sample0024_140250	8000086433	Initial	MRM+	148.10/84.00	Qualifier	Gln\Lys IS	0	176.263	854292	23663	0	0	481277	13350	Savitzky-Golay,7,2	0.13/0.80	0.381	NBS: ISConc=-1;	Peak Area	0	0	0
HIE with sampling at different times (A)	HIE-3h	ESI1	1	Gly	sample0024_140250	8000086433	Initial	MRM+	76.00/30.00	Qualifier	Gly IS	0	294.764	205804	6119	0	0	416992	12039	Savitzky-Golay,7,2	0.13/0.80	0.352	NBS: ISConc=553; LC: TargetConc=549, Stdev=66; HC: TargetConc=1320, Stdev=160	Peak Area	0	0	0
HIE with sampling at different times (A)	HIE-3h	ESI1	1	Gly IS	sample0024_140250	8000086433	Initial	MRM+	78.00/32.00	IS		553	0	416992	12039	0	0	0	0	Savitzky-Golay,7,2	0.13/0.80	0.352	NBS: Internal Standard;	Peak Area	0	0	0
HIE with sampling at different times (A)	HIE-3h	ESI1	1	Leu\Ile\Pro-OH	sample0024_140250	8000086433	Initial	MRM+	132.10/86.10	Qualifier	Leu\Ile\Pro-OH IS	0	255.25	6310393	175583	0	0	2521932	70140	Savitzky-Golay,7,2	0.13/0.80	0.176	NBS: ISConc=101; Initial: LimitLow=0, LimitHigh=380; Retest: LimitLow=0, LimitHigh=380; Recall: LimitLow=0, LimitHigh=380; Recall retest: LimitLow=0, LimitHigh=380; LC: TargetConc=183, Stdev=22; HC: TargetConc=772, Stdev=93	Peak Area	190	0	380
HIE with sampling at different times (A)	HIE-3h	ESI1	1	Leu\Ile\Pro-OH IS	sample0024_140250	8000086433	Initial	MRM+	135.10/89.10	IS		101	0	2521932	70140	0	0	0	0	Savitzky-Golay,7,2	0.13/0.80	0.176	NBS: Internal Standard;	Peak Area	0	0	0
HIE with sampling at different times (A)	HIE-3h	ESI1	1	Met	sample0024_140250	8000086433	Initial	MRM+	150.10/104.10	Qualifier	Met IS	0	12.911	50074	1575	0	0	448528	12126	Savitzky-Golay,7,2	0.13/0.80	0.381	NBS: ISConc=99.7; Initial: LimitLow=7, LimitHigh=80; Retest: LimitLow=7, LimitHigh=80; Recall: LimitLow=7, LimitHigh=80; Recall retest: LimitLow=7, LimitHigh=80; LC: TargetConc=36, Stdev=4.3; HC: TargetConc=177, Stdev=21	Peak Area	43.5	7	80
HIE with sampling at different times (A)	HIE-3h	ESI1	1	Met IS	sample0024_140250	8000086433	Initial	MRM+	153.10/107.10	IS		99.7	0	448528	12126	0	0	0	0	Savitzky-Golay,7,2	0.13/0.80	0.176	NBS: Internal Standard;	Peak Area	0	0	0
HIE with sampling at different times (A)	HIE-3h	ESI1	1	Orn	sample0024_140250	8000086433	Initial	MRM+	133.10/70.10	Qualifier	Orn IS	0	32.883	207456	5678	0	0	687675	19573	Savitzky-Golay,7,2	0.13/0.80	0.264	NBS: ISConc=109; LC: TargetConc=154, Stdev=18; HC: TargetConc=488, Stdev=59	Peak Area	0	0	0
HIE with sampling at different times (A)	HIE-3h	ESI1	1	Orn IS	sample0024_140250	8000086433	Initial	MRM+	139.10/76.10	IS		109	0	687675	19573	0	0	0	0	Savitzky-Golay,7,2	0.13/0.80	0.235	NBS: Internal Standard;	Peak Area	0	0	0
HIE with sampling at different times (A)	HIE-3h	ESI1	1	Phe	sample0024_140250	8000086433	Initial	MRM+	166.10/120.10	Qualifier	Phe IS	0	49.024	1598467	46020	0	0	2528374	67822	Savitzky-Golay,7,2	0.13/0.80	0.205	NBS: ISConc=71.8; Initial: LimitLow=0, LimitHigh=120; Retest: LimitLow=0, LimitHigh=120; Recall: LimitLow=0, LimitHigh=120; Recall retest: LimitLow=0, LimitHigh=120; LC: TargetConc=79.4, Stdev=9.5; HC: TargetConc=264, Stdev=32	Peak Area	60	0	120
HIE with sampling at different times (A)	HIE-3h	ESI1	1	Phe IS	sample0024_140250	8000086433	Initial	MRM+	172.10/126.10	IS		71.8	0	2528374	67822	0	0	0	0	Savitzky-Golay,7,2	0.13/0.80	0.176	NBS: Internal Standard;	Peak Area	0	0	0
HIE with sampling at different times (A)	HIE-3h	ESI1	1	Pro	sample0024_140250	8000086433	Initial	MRM+	116.10/70.10	Qualifier	Pro IS	0	161.212	3246076	88994	0	0	1577012	44466	Savitzky-Golay,7,2	0.13/0.80	0.205	NBS: ISConc=88; LC: TargetConc=235, Stdev=28; HC: TargetConc=683, Stdev=82	Peak Area	0	0	0
HIE with sampling at different times (A)	HIE-3h	ESI1	1	Pro IS	sample0024_140250	8000086433	Initial	MRM+	121.10/74.10	IS		88	0	1577012	44466	0	0	0	0	Savitzky-Golay,7,2	0.13/0.80	0.176	NBS: Internal Standard;	Peak Area	0	0	0
HIE with sampling at different times (A)	HIE-3h	ESI1	1	Tyr	sample0024_140250	8000086433	Initial	MRM+	182.10/136.10	Qualifier	Tyr IS	0	164.02	1104687	31645	0	0	951329	26353	Savitzky-Golay,7,2	0.13/0.80	0.469	NBS: ISConc=113; LC: TargetConc=136, Stdev=16; HC: TargetConc=549, Stdev=66	Peak Area	0	0	0
HIE with sampling at different times (A)	HIE-3h	ESI1	1	Tyr IS	sample0024_140250	8000086433	Initial	MRM+	188.10/142.10	IS		113	0	951329	26353	0	0	0	0	Savitzky-Golay,7,2	0.13/0.80	0.352	NBS: Internal Standard;	Peak Area	0	0	0
HIE with sampling at different times (A)	HIE-3h	ESI1	1	Val	sample0024_140250	8000086433	Initial	MRM+	118.10/72.10	Qualifier	Val IS	0	168.04	2410020	69603	0	0	1734802	49345	Savitzky-Golay,7,2	0.13/0.80	0.176	NBS: ISConc=108; LC: TargetConc=213, Stdev=26; HC: TargetConc=470, Stdev=56	Peak Area	0	0	0
HIE with sampling at different times (A)	HIE-3h	ESI1	1	Val IS	sample0024_140250	8000086433	Initial	MRM+	124.10/77.10	IS		108	0	1734802	49345	0	0	0	0	Savitzky-Golay,7,2	0.13/0.80	0.176	NBS: Internal Standard;	Peak Area	0	0	0
HIE with sampling at different times (A)	HIE-3h	ESI1	1	C0	sample0024_140250	8000086433	Initial	MRM+	162.10/103.00	Qualifier	C0 IS	0	17.245	407105	12209	0	0	347490	9306	Savitzky-Golay,7,2	0.13/0.80	0.763	NBS: ISConc=11.5; Initial: LimitLow=8, LimitHigh=90; Retest: LimitLow=8, LimitHigh=90; Recall: LimitLow=8, LimitHigh=90; Recall retest: LimitLow=8, LimitHigh=90; LC: TargetConc=41, Stdev=4.9; HC: TargetConc=151, Stdev=18	Peak Area	49	8	90
HIE with sampling at different times (A)	HIE-3h	ESI1	1	C0 IS	sample0024_140250	8000086433	Initial	MRM+	171.20/103.00	IS		11.5	0	347490	9306	0	0	0	0	Savitzky-Golay,7,2	0.13/0.80	0.616	NBS: Internal Standard;	Peak Area	0	0	0
HIE with sampling at different times (A)	HIE-3h	ESI1	1	C2	sample0024_140250	8000086433	Initial	MRM+	204.10/85.00	Qualifier	C2 IS	0	5.712	831352	22363	0	0	765337	21014	Savitzky-Golay,7,2	0.13/0.80	0.499	NBS: ISConc=4.78; Initial: LimitLow=0, LimitHigh=115; Retest: LimitLow=0, LimitHigh=115; Recall: LimitLow=0, LimitHigh=115; Recall retest: LimitLow=0, LimitHigh=115; LC: TargetConc=27.6, Stdev=3.3; HC: TargetConc=82.4, Stdev=9.9	Peak Area	57.5	0	115
HIE with sampling at different times (A)	HIE-3h	ESI1	1	C2 IS	sample0024_140250	8000086433	Initial	MRM+	207.10/85.00	IS		4.78	0	765337	21014	0	0	0	0	Savitzky-Golay,7,2	0.13/0.80	0.411	NBS: Internal Standard;	Peak Area	0	0	0
HIE with sampling at different times (A)	HIE-3h	ESI1	1	C3	sample0024_140250	8000086433	Initial	MRM+	218.10/85.00	Qualifier	C3 IS	0	0.235	42601	1439	0	0	368209	10082	Savitzky-Golay,7,2	0.13/0.80	0.557	NBS: ISConc=2.03; Initial: LimitLow=0, LimitHigh=6.8; Retest: LimitLow=0, LimitHigh=6.8; Recall: LimitLow=0, LimitHigh=6.8; Recall retest: LimitLow=0, LimitHigh=6.8; LC: TargetConc=4.63, Stdev=0.56; HC: TargetConc=13.3, Stdev=1.6	Peak Area	3.4	0	6.8
HIE with sampling at different times (A)	HIE-3h	ESI1	1	C3 IS	sample0024_140250	8000086433	Initial	MRM+	221.20/85.00	IS		2.03	0	368209	10082	0	0	0	0	Savitzky-Golay,7,2	0.13/0.80	0.733	NBS: Internal Standard;	Peak Area	0	0	0
HIE with sampling at different times (A)	HIE-3h	ESI1	1	C3DC\C4OH	sample0024_140250	8000086433	Initial	MRM+	248.10/85.00	Qualifier	C4 IS	0	0.177	38596	1210	0	0	316652	8398	Savitzky-Golay,7,2	0.13/0.80	0.381	NBS: ISConc=-1; Initial: LimitLow=0, LimitHigh=10; Retest: LimitLow=0.04, LimitHigh=10; Recall: LimitLow=0.04, LimitHigh=10; Recall retest: LimitLow=0.04, LimitHigh=10	Peak Area	5	0	10
HIE with sampling at different times (A)	HIE-3h	ESI1	1	C4	sample0024_140250	8000086433	Initial	MRM+	232.20/85.00	Qualifier	C4 IS	0	0.062	13522	466	0	0	316652	8398	Savitzky-Golay,7,2	0.13/0.80	0.381	NBS: ISConc=1.45; Initial: LimitLow=0, LimitHigh=1.5; Retest: LimitLow=0, LimitHigh=1.5; Recall: LimitLow=0, LimitHigh=1.5; Recall retest: LimitLow=0, LimitHigh=1.5; LC: TargetConc=0.74, Stdev=0.1; HC: TargetConc=2.74, Stdev=0.33	Peak Area	0.75	0	1.5
HIE with sampling at different times (A)	HIE-3h	ESI1	1	C4 IS	sample0024_140250	8000086433	Initial	MRM+	235.20/85.00	IS		1.45	0	316652	8398	0	0	0	0	Savitzky-Golay,7,2	0.13/0.80	0.44	NBS: Internal Standard;	Peak Area	0	0	0
HIE with sampling at different times (A)	HIE-3h	ESI1	1	C4DC\C5OH	sample0024_140250	8000086433	Initial	MRM+	262.20/85.00	Qualifier	C5 IS	0	0.043	9459	383	0	0	337874	9739	Savitzky-Golay,7,2	0.13/0.80	0.293	NBS: ISConc=-1; Initial: LimitLow=0, LimitHigh=0.5; Retest: LimitLow=0, LimitHigh=0.5; Recall: LimitLow=0, LimitHigh=0.5; Recall retest: LimitLow=0, LimitHigh=0.5	Peak Area	0.25	0	0.5
HIE with sampling at different times (A)	HIE-3h	ESI1	1	C5	sample0024_140250	8000086433	Initial	MRM+	246.20/85.00	Qualifier	C5 IS	0	0.055	12665	511	0	0	337874	9739	Savitzky-Golay,7,2	0.13/0.80	0.499	NBS: ISConc=1.52; Initial: LimitLow=0, LimitHigh=0.56; Retest: LimitLow=0, LimitHigh=0.56; Recall: LimitLow=0, LimitHigh=0.56; Recall retest: LimitLow=0, LimitHigh=0.56; LC: TargetConc=0.63, Stdev=0.08; HC: TargetConc=2.46, Stdev=0.3	Peak Area	0.28	0	0.56
HIE with sampling at different times (A)	HIE-3h	ESI1	1	C5 IS	sample0024_140250	8000086433	Initial	MRM+	255.20/85.00	IS		1.52	0	337874	9739	0	0	0	0	Savitzky-Golay,7,2	0.13/0.80	0.763	NBS: Internal Standard;	Peak Area	0	0	0
HIE with sampling at different times (A)	HIE-3h	ESI1	1	C5:1	sample0024_140250	8000086433	Initial	MRM+	244.20/85.00	Qualifier	C5 IS	0	0.023	5220	231	0	0	337874	9739	Savitzky-Golay,7,2	0.13/0.80	0.411	NBS: ISConc=-1; Initial: LimitLow=0, LimitHigh=0.15; Retest: LimitLow=0, LimitHigh=0.15; Recall: LimitLow=0, LimitHigh=0.15; Recall retest: LimitLow=0, LimitHigh=0.15	Peak Area	0.075	0	0.15
HIE with sampling at different times (A)	HIE-3h	ESI1	1	C5DC\C6OH	sample0024_140250	8000086433	Initial	MRM+	276.20/85.00	Qualifier	C5DC\C6OH IS	0	0.042	3269	161	0	0	117234	3359	Savitzky-Golay,7,2	0.13/0.80	0.293	NBS: ISConc=1.49; Initial: LimitLow=0, LimitHigh=0.3; Retest: LimitLow=0, LimitHigh=0.3; Recall: LimitLow=0, LimitHigh=0.3; Recall retest: LimitLow=0, LimitHigh=0.3; LC: TargetConc=0.39, Stdev=0.09; HC: TargetConc=1.98, Stdev=0.24	Peak Area	0.15	0	0.3
HIE with sampling at different times (A)	HIE-3h	ESI1	1	C5DC\C6OH IS	sample0024_140250	8000086433	Initial	MRM+	282.20/85.00	IS		1.49	0	117234	3359	0	0	0	0	Savitzky-Golay,7,2	0.13/0.80	0.264	NBS: Internal Standard;	Peak Area	0	0	0
HIE with sampling at different times (A)	HIE-3h	ESI1	1	C6	sample0024_140250	8000086433	Initial	MRM+	260.20/85.00	Qualifier	C6 IS	0	0.003	658	69	0	0	281134	7702	Savitzky-Golay,7,2	0.13/0.80	0.147	NBS: ISConc=1.03; Initial: LimitLow=0, LimitHigh=0.2; Retest: LimitLow=0, LimitHigh=0.2; Recall: LimitLow=0, LimitHigh=0.2; Recall retest: LimitLow=0, LimitHigh=0.2; LC: TargetConc=0.29, Stdev=0.09; HC: TargetConc=1.4, Stdev=0.17	Peak Area	0.1	0	0.2
HIE with sampling at different times (A)	HIE-3h	ESI1	1	C6 IS	sample0024_140250	8000086433	Initial	MRM+	263.20/85.00	IS		1.03	0	281134	7702	0	0	0	0	Savitzky-Golay,7,2	0.13/0.80	0.147	NBS: Internal Standard;	Peak Area	0	0	0
HIE with sampling at different times (A)	HIE-3h	ESI1	1	C6DC	sample0024_140250	8000086433	Initial	MRM+	290.20/85.00	Qualifier	C5DC\C6OH IS	0	0.059	4651	179	0	0	117234	3359	Savitzky-Golay,7,2	0.13/0.80	0.587	NBS: ISConc=-1;	Peak Area	0	0	0
HIE with sampling at different times (A)	HIE-3h	ESI1	1	C8	sample0024_140250	8000086433	Initial	MRM+	288.20/85.00	Qualifier	C8 IS	0	0.037	7612	278	0	0	218934	7692	Savitzky-Golay,7,2	0.13/0.80	0.147	NBS: ISConc=1.04; Initial: LimitLow=0, LimitHigh=0.4; Retest: LimitLow=0, LimitHigh=0.4; Recall: LimitLow=0, LimitHigh=0.4; Recall retest: LimitLow=0, LimitHigh=0.4; LC: TargetConc=0.55, Stdev=0.08; HC: TargetConc=2.76, Stdev=0.33	Peak Area	0.2	0	0.4
HIE with sampling at different times (A)	HIE-3h	ESI1	1	C8 IS	sample0024_140250	8000086433	Initial	MRM+	291.20/85.00	IS		1.04	0	218934	7692	0	0	0	0	Savitzky-Golay,7,2	0.13/0.80	0.147	NBS: Internal Standard;	Peak Area	0	0	0
HIE with sampling at different times (A)	HIE-3h	ESI1	1	C8:1	sample0024_140250	8000086433	Initial	MRM+	286.20/85.00	Qualifier	C8 IS	0	0.019	4075	158	0	0	218934	7692	Savitzky-Golay,7,2	0.13/0.80	0.352	NBS: ISConc=-1;	Peak Area	0	0	0
HIE with sampling at different times (A)	HIE-3h	ESI1	1	C10	sample0024_140250	8000086433	Initial	MRM+	316.20/85.00	Qualifier	C10 IS	0	0.067	18238	733	0	0	295164	8728	Savitzky-Golay,7,2	0.13/0.80	0.147	NBS: ISConc=0.91; Initial: LimitLow=0, LimitHigh=0.29; Retest: LimitLow=0, LimitHigh=0.29; Recall: LimitLow=0, LimitHigh=0.29; Recall retest: LimitLow=0, LimitHigh=0.29; LC: TargetConc=0.31, Stdev=0.09; HC: TargetConc=2.02, Stdev=0.24	Peak Area	0.145	0	0.29
HIE with sampling at different times (A)	HIE-3h	ESI1	1	C10 IS	sample0024_140250	8000086433	Initial	MRM+	319.30/85.00	IS		0.91	0	295164	8728	0	0	0	0	Savitzky-Golay,7,2	0.13/0.80	0.147	NBS: Internal Standard;	Peak Area	0	0	0
HIE with sampling at different times (A)	HIE-3h	ESI1	1	C10:1	sample0024_140250	8000086433	Initial	MRM+	314.20/85.00	Qualifier	C10 IS	0	0.014	4484	223	0	0	295164	8728	Savitzky-Golay,7,2	0.13/0.80	0.176	NBS: ISConc=-1; Initial: LimitLow=0, LimitHigh=0.3; Retest: LimitLow=0, LimitHigh=0.3; Recall: LimitLow=0, LimitHigh=0.3; Recall retest: LimitLow=0, LimitHigh=0.3	Peak Area	0.15	0	0.3
HIE with sampling at different times (A)	HIE-3h	ESI1	1	C10:2	sample0024_140250	8000086433	Initial	MRM+	312.20/85.00	Qualifier	C10 IS	0	0.005	1626	111	0	0	295164	8728	Savitzky-Golay,7,2	0.13/0.80	0.44	NBS: ISConc=-1; Initial: LimitLow=0, LimitHigh=100; Retest: LimitLow=0, LimitHigh=100; Recall: LimitLow=0, LimitHigh=100; Recall retest: LimitLow=0, LimitHigh=100	Peak Area	50	0	100
HIE with sampling at different times (A)	HIE-3h	ESI1	1	C12	sample0024_140250	8000086433	Initial	MRM+	344.30/85.00	Qualifier	C12 IS	0	0.127	42311	1359	0	0	345217	10461	Savitzky-Golay,7,2	0.13/0.80	0.264	NBS: ISConc=1; Initial: LimitLow=0, LimitHigh=0.33; Retest: LimitLow=0, LimitHigh=0.33; Recall: LimitLow=0, LimitHigh=0.33; Recall retest: LimitLow=0, LimitHigh=0.33; LC: TargetConc=0.28, Stdev=0.09; HC: TargetConc=1.36, Stdev=0.16	Peak Area	0.165	0	0.33
HIE with sampling at different times (A)	HIE-3h	ESI1	1	C12 IS	sample0024_140250	8000086433	Initial	MRM+	347.30/85.00	IS		1	0	345217	10461	0	0	0	0	Savitzky-Golay,7,2	0.13/0.80	0.176	NBS: Internal Standard;	Peak Area	0	0	0
HIE with sampling at different times (A)	HIE-3h	ESI1	1	C12:1	sample0024_140250	8000086433	Initial	MRM+	342.30/85.00	Qualifier	C12 IS	0	0.012	4240	167	0	0	345217	10461	Savitzky-Golay,7,2	0.13/0.80	0.645	NBS: ISConc=-1; Initial: LimitLow=0, LimitHigh=1000; Retest: LimitLow=0, LimitHigh=1000; Recall: LimitLow=0, LimitHigh=1000; Recall retest: LimitLow=0, LimitHigh=10000	Peak Area	500	0	1000
HIE with sampling at different times (A)	HIE-3h	ESI1	1	C14	sample0024_140250	8000086433	Initial	MRM+	372.30/85.00	Qualifier	C14 IS	0	0.284	125183	4061	0	0	481142	14287	Savitzky-Golay,7,2	0.13/0.80	0.205	NBS: ISConc=1.02; Initial: LimitLow=0, LimitHigh=0.59; Retest: LimitLow=0, LimitHigh=0.59; Recall: LimitLow=0, LimitHigh=0.59; Recall retest: LimitLow=0, LimitHigh=0.59; LC: TargetConc=0.33, Stdev=0.09; HC: TargetConc=1.9, Stdev=0.23	Peak Area	0.295	0	0.59
HIE with sampling at different times (A)	HIE-3h	ESI1	1	C14 IS	sample0024_140250	8000086433	Initial	MRM+	375.30/85.00	IS		1.02	0	481142	14287	0	0	0	0	Savitzky-Golay,7,2	0.13/0.80	0.147	NBS: Internal Standard;	Peak Area	0	0	0
HIE with sampling at different times (A)	HIE-3h	ESI1	1	C14:1	sample0024_140250	8000086433	Initial	MRM+	370.30/85.00	Qualifier	C14 IS	0	0.029	13769	546	0	0	481142	14287	Savitzky-Golay,7,2	0.13/0.80	0.528	NBS: ISConc=-1; Initial: LimitLow=0, LimitHigh=0.32; Retest: LimitLow=0, LimitHigh=0.32; Recall: LimitLow=0, LimitHigh=0.32; Recall retest: LimitLow=0, LimitHigh=0.32	Peak Area	0.16	0	0.32
HIE with sampling at different times (A)	HIE-3h	ESI1	1	C14:2	sample0024_140250	8000086433	Initial	MRM+	368.30/85.00	Qualifier	C14 IS	0	0.004	2050	140	0	0	481142	14287	Savitzky-Golay,7,2	0.13/0.80	0.411	NBS: ISConc=-1;	Peak Area	0	0	0
HIE with sampling at different times (A)	HIE-3h	ESI1	1	C14OH	sample0024_140250	8000086433	Initial	MRM+	388.30/85.00	Qualifier	C14 IS	0	0	0	0	0	0	481142	14287	Savitzky-Golay,7,2	0.13/0.80	0.763	NBS: ISConc=-1; Initial: LimitLow=0, LimitHigh=0.2; Retest: LimitLow=0, LimitHigh=0.2; Recall: LimitLow=0, LimitHigh=0.2; Recall retest: LimitLow=0, LimitHigh=0.2	Peak Area	0.1	0	0.2
HIE with sampling at different times (A)	HIE-3h	ESI1	1	C16	sample0024_140250	8000086433	Initial	MRM+	400.30/85.00	Qualifier	C16 IS	0	1.338	651507	20052	0	0	463549	13358	Savitzky-Golay,7,2	0.13/0.80	0.147	NBS: ISConc=0.89; Initial: LimitLow=0.3, LimitHigh=8.5; Retest: LimitLow=0.3, LimitHigh=8.5; Recall: LimitLow=0.3, LimitHigh=8.5; Recall retest: LimitLow=0.3, LimitHigh=8.5; LC: TargetConc=2.02, Stdev=0.24; HC: TargetConc=11.7, Stdev=1.4	Peak Area	4.4	0.3	8.5
HIE with sampling at different times (A)	HIE-3h	ESI1	1	C16 IS	sample0024_140250	8000086433	Initial	MRM+	403.40/85.00	IS		0.89	0	463549	13358	0	0	0	0	Savitzky-Golay,7,2	0.13/0.80	0.352	NBS: Internal Standard;	Peak Area	0	0	0
HIE with sampling at different times (A)	HIE-3h	ESI1	1	C16:1	sample0024_140250	8000086433	Initial	MRM+	398.30/85.00	Qualifier	C16 IS	0	0.04	20684	732	0	0	463549	13358	Savitzky-Golay,7,2	0.13/0.80	0.352	NBS: ISConc=-1;	Peak Area	0	0	0
HIE with sampling at different times (A)	HIE-3h	ESI1	1	C16OH	sample0024_140250	8000086433	Initial	MRM+	416.30/85.00	Qualifier	C16 IS	0	0.017	8989	259	0	0	463549	13358	Savitzky-Golay,7,2	0.13/0.80	0.352	NBS: ISConc=-1; Initial: LimitLow=0, LimitHigh=0.19; Retest: LimitLow=0, LimitHigh=0.19; Recall: LimitLow=0, LimitHigh=0.19; Recall retest: LimitLow=0, LimitHigh=0.19	Peak Area	0.095	0	0.19
HIE with sampling at different times (A)	HIE-3h	ESI1	1	C16:1OH\C17	sample0024_140250	8000086433	Initial	MRM+	414.30/85.00	Qualifier	C16 IS	0	0.048	25020	890	0	0	463549	13358	Savitzky-Golay,7,2	0.13/0.80	0.293	NBS: ISConc=-1; Initial: LimitLow=0, LimitHigh=0.22; Retest: LimitLow=0, LimitHigh=0.22; Recall: LimitLow=0, LimitHigh=0.22; Recall retest: LimitLow=0, LimitHigh=0.22	Peak Area	0.11	0	0.22
HIE with sampling at different times (A)	HIE-3h	ESI1	1	C18	sample0024_140250	8000086433	Initial	MRM+	428.40/85.00	Qualifier	C18 IS	0	0.461	238650	6567	0	0	575829	17917	Savitzky-Golay,7,2	0.13/0.80	0.293	NBS: ISConc=0.92; Initial: LimitLow=0.13, LimitHigh=2.5; Retest: LimitLow=0.13, LimitHigh=2.5; Recall: LimitLow=0.13, LimitHigh=2.5; Recall retest: LimitLow=0.13, LimitHigh=2.5; LC: TargetConc=1.14, Stdev=0.14; HC: TargetConc=4.32, Stdev=0.52	Peak Area	1.315	0.13	2.5
HIE with sampling at different times (A)	HIE-3h	ESI1	1	C18 IS	sample0024_140250	8000086433	Initial	MRM+	431.40/85.00	IS		0.92	0	575829	17917	0	0	0	0	Savitzky-Golay,7,2	0.13/0.80	0.147	NBS: Internal Standard;	Peak Area	0	0	0
HIE with sampling at different times (A)	HIE-3h	ESI1	1	C18:1	sample0024_140250	8000086433	Initial	MRM+	426.40/85.00	Qualifier	C18 IS	0	0.499	312162	9195	0	0	575829	17917	Savitzky-Golay,7,2	0.13/0.80	0.205	NBS: ISConc=-1; Initial: LimitLow=0.15, LimitHigh=3.35; Retest: LimitLow=0.15, LimitHigh=3.35; Recall: LimitLow=0.15, LimitHigh=3.35; Recall retest: LimitLow=0.15, LimitHigh=3.35	Peak Area	1.75	0.15	3.35
HIE with sampling at different times (A)	HIE-3h	ESI1	1	C18:2	sample0024_140250	8000086433	Initial	MRM+	424.30/85.00	Qualifier	C18 IS	0	0.005	3233	133	0	0	575829	17917	Savitzky-Golay,7,2	0.13/0.80	0.264	NBS: ISConc=-1;	Peak Area	0	0	0
HIE with sampling at different times (A)	HIE-3h	ESI1	1	C18OH	sample0024_140250	8000086433	Initial	MRM+	444.40/85.00	Qualifier	C18 IS	0	0.014	8518	287	0	0	575829	17917	Savitzky-Golay,7,2	0.13/0.80	0.499	NBS: ISConc=-1; Initial: LimitLow=0, LimitHigh=0.14; Retest: LimitLow=0, LimitHigh=0.14; Recall: LimitLow=0, LimitHigh=0.14; Recall retest: LimitLow=0, LimitHigh=0.14	Peak Area	0.07	0	0.14
HIE with sampling at different times (A)	HIE-3h	ESI1	1	C18:1OH	sample0024_140250	8000086433	Initial	MRM+	442.40/85.00	Qualifier	C18 IS	0	0.034	21223	657	0	0	575829	17917	Savitzky-Golay,7,2	0.13/0.80	0.616	NBS: ISConc=-1; Initial: LimitLow=0, LimitHigh=0.16; Retest: LimitLow=0, LimitHigh=0.16; Recall: LimitLow=0, LimitHigh=0.16; Recall retest: LimitLow=0, LimitHigh=0.16	Peak Area	0.08	0	0.16
HIE with sampling at different times (A)	HIE-3h	ESI1	1	C18:2OH	sample0024_140250	8000086433	Initial	MRM+	440.30/85.00	Qualifier	C18 IS	0	0.038	23687	807	0	0	575829	17917	Savitzky-Golay,7,2	0.13/0.80	0.381	NBS: ISConc=-1;	Peak Area	0	0	0
HIE with sampling at different times (A)	HIE-3h	ESI1	1	C20	sample0024_140250	8000086433	Initial	MRM+	456.40/85.00	Qualifier	C26 IS	0	0.02	16368	545	0	0	893302	23891	Savitzky-Golay,7,2	0.13/0.80	0.763	NBS: ISConc=-1;	Peak Area	0	0	0
HIE with sampling at different times (A)	HIE-3h	ESI1	1	C22	sample0024_140250	8000086433	Initial	MRM+	484.40/85.00	Qualifier	C26 IS	0	0.01	8325	303	0	0	893302	23891	Savitzky-Golay,7,2	0.13/0.80	0.352	NBS: ISConc=-1;	Peak Area	0	0	0
HIE with sampling at different times (A)	HIE-3h	ESI1	1	C24	sample0024_140250	8000086433	Initial	MRM+	512.50/85.00	Qualifier	C26 IS	0	0.032	26155	784	0	0	893302	23891	Savitzky-Golay,7,2	0.13/0.80	0.528	NBS: ISConc=-1;	Peak Area	0	0	0
HIE with sampling at different times (A)	HIE-3h	ESI1	1	C26	sample0024_140250	8000086433	Initial	MRM+	540.50/85.00	Qualifier	C26 IS	0	0.005	3840	220	0	0	893302	23891	Savitzky-Golay,7,2	0.13/0.80	0.411	NBS: ISConc=1.09; LC: TargetConc=0.61, Stdev=0.09; HC: TargetConc=1.66, Stdev=0.2	Peak Area	0	0	0
HIE with sampling at different times (A)	HIE-3h	ESI1	1	C26 IS	sample0024_140250	8000086433	Initial	MRM+	543.50/85.00	IS		1.09	0	893302	23891	0	0	0	0	Savitzky-Golay,7,2	0.13/0.80	0.587	NBS: Internal Standard;	Peak Area	0	0	0
HIE with sampling at different times (A)	HIE-3h	ESI1	1	SA	sample0024_140250	8000086433	Initial	MRM+	155.10/109.10	Qualifier	SA IS	0	0.384	8768	319	0	0	1327634	36751	Savitzky-Golay,7,2	0.13/0.80	0.293	NBS: ISConc=58.1; Initial: LimitLow=0, LimitHigh=2; Retest: LimitLow=0, LimitHigh=2; Recall: LimitLow=0, LimitHigh=2; Recall retest: LimitLow=0, LimitHigh=2; LC: TargetConc=2.57, Stdev=0.38; HC: TargetConc=10.4, Stdev=1.2	Peak Area	1	0	2
HIE with sampling at different times (A)	HIE-3h	ESI1	1	SA IS	sample0024_140250	8000086433	Initial	MRM+	160.10/114.10	IS		58.1	0	1327634	36751	0	0	0	0	Savitzky-Golay,7,2	0.13/0.80	0.469	NBS: Internal Standard;	Peak Area	0	0	0
[truncated: 6,064 more rows]
